# Supplementary material for: Organocatalytic enantioselective desymmetrization of enal-tethered cyclohexane-1,3-diones
Source: Royal Society of Chemistry journal article supplement (doi:10.1039/d4cc00487f), 2024-01-01

## Supplementary Information

### Organocatalytic Enantioselective Desymmetrization of Enal-Tethered Cyclohexane-1,3-diones

Lakshmi Revati Magham,<sup>a,c</sup> Abdus Samad<sup>a,c</sup> Satish B. Thopate,<sup>a,c</sup> Jagadeesh Babu Nanubolu<sup>b,c</sup> and Rambabu Chegondi<sup>\*,a,c</sup>

<sup>a</sup>Department of Organic Synthesis & Process Chemistry, <sup>b</sup>Department of Analytical and Structural Chemistry, CSIR-Indian Institute of Chemical Technology (CSIR-IICT), Hyderabad 500007, India.

<sup>c</sup>Academy of Scientific and Innovative Research (AcSIR), Ghaziabad 201002, India.

E-mail: [rchegondi@iict.res.in/cramhcu@gmail.com](mailto:rchegondi@iict.res.in/cramhcu@gmail.com)

|                                                                | Pages     |
|----------------------------------------------------------------|-----------|
| I. General details                                             | 02        |
| II. Experimental procedures and analytical data                |           |
| IIa. Experimental procedures and analytical data of products   | 03 to 36  |
| IIb. One millimole-scale reaction and Synthetic utility        | 36 to 41  |
| IIc. Labelling studies                                         | 41 to 42  |
| IId. Experimental procedures and analytical data of substrates | 43 to 53  |
| III. References                                                | 54        |
| IV. X-ray crystallographic data                                | 55 to 56  |
| V. <sup>1</sup> H NMR and <sup>13</sup> C NMR spectra          | 57 to 114 |

## I. General details:

Unless otherwise noted, all reagents were used as received from commercial suppliers. TMS-Prolinol catalysts were purchased from Sigma-Aldrich and used without further purification. All reactions were performed under a nitrogen atmosphere and in flame-dried or oven-dried glassware with magnetic stirring. Unless otherwise noted, all solvents were purchased from Merk, Finar, or Spectrochem, and used without further purification. Reactions were monitored using thin-layer chromatography (SiO<sub>2</sub>). TLC plates were visualized with UV light (254 nm), iodine treatment, or using *p*-anisaldehyde stain or  $\beta$ -naphthol stain. Column chromatography was carried out using silica gel (60-120 mesh & 100-200 mesh) packed in glass columns. NMR spectra were recorded at 300, 400, 500 MHz (H) and 75, 100, 125 MHz (C), respectively. Chemical shifts ( $\delta$ ) are reported in ppm, using the residual solvent peak in CDCl<sub>3</sub> (H:  $\delta$  = 7.26 and C:  $\delta$  = 77.16 ppm) as internal standard, and coupling constants (*J*) are given in Hz. The following abbreviations were used to designate the multiplicities: s = singlet; d = doublet; t = triplet; q = quartet; dd = doublet of doublet; dt = doublet of triplet; dq = doublet of quartet; m = multiplet; br.s = broad singlet; qd = quartet of doublet. HRMS were recorded using ESI-TOF techniques. Enantiomeric ratio (*er*) values were determined by chiral HPLC of the purified product with hexane and *i*-PrOH as solvents and diastereomer ratio (*dr*) values were determined by <sup>1</sup>H NMR analysis. All chiral compound's optical rotation was measured on a Horiba SEPA-300.

## II. Experimental Procedures and Analytical Data

### IIa. Experimental procedures and analytical data of products:

#### General Procedure for organocatalytic enantioselective desymmetrization:

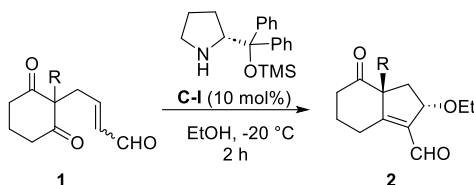

To a stirred solution of enal-tethered cyclohexane 1,3-dione **1** (0.3 mmol) in EtOH (1.5 mL, 0.2 M) at -20 °C was added Jørgensen-Hayashi catalyst **C-I** (10.2 mg, 0.03 mmol, 10 mol%) under nitrogen atmosphere. The reaction was allowed to stir at the same temperature until complete consumption of starting material (monitored by TLC). Afterward, the solvent was evaporated under reduced pressure at 40-45°C (rotary evaporator water bath) and the crude residue was directly purified by column chromatography on silica gel (EtOAc in Hexane) to give the desired product **2** with from 5:1 to >20:1 ratio of diastereoselectivity (*dr*). [**Note:** For racemic products, Piperidine catalyst (10 mol%) was used at room temperature and followed the same procedure as above]. The enantiomeric excess was determined by chiral HPLC analysis. Here, diastereoselectivity (*dr*) was measured from <sup>1</sup>H NMR analysis of crude product and reported the NMR data for major isomer of product **2**.

#### (2*S*,7*aR*)-2-Methoxy-7*a*-methyl-7-oxo-2,4,5,6,7,7*a*-hexahydro-1*H*-indene-3-carbaldehyde (**2a**):

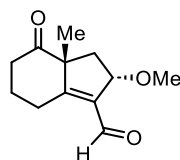

Prepared according to the general procedure as described above in 82% yield (51 mg; *dr* = >20:1). It was purified by flash chromatography (30% EtOAc/hexane; *R<sub>f</sub>* = 0.4) to afford yellow liquid; <sup>1</sup>H NMR (400 MHz, CDCl<sub>3</sub>) δ 9.92 (s, 1H), 4.72 (ddd, *J* = 7.5, 5.2, 2.6 Hz, 1H), 3.42 – 3.39 (m, 1H), 3.37 (d, *J* = 0.8 Hz, 3H), 2.70 (ddd, *J* = 15.4, 13.6, 6.1 Hz, 1H), 2.55 – 2.45 (m, 2H), 2.41 (dd, *J* = 14.0, 5.1 Hz, 1H), 2.29 – 2.18 (m, 1H), 2.08 (dd, *J* = 14.1, 7.3 Hz, 1H), 1.81 – 1.67 (m, 1H), 1.37 (s, 3H); <sup>13</sup>C NMR (101 MHz, CDCl<sub>3</sub>) δ 210.3, 188.5, 166.8, 135.6, 81.3, 62.3, 57.0, 38.1, 37.5, 26.4, 24.1, 23.0; HRMS (ESI) calcd for C<sub>12</sub>H<sub>17</sub>O<sub>3</sub> [M+H]<sup>+</sup>: 209.1178; found: 209.1226; [α]<sub>D</sub><sup>20</sup> = -125.22° (*c* 1.0, CHCl<sub>3</sub>); 85:15*er*; Chiral HPLC analysis of the product: Daicel Chiralpak IC 250X4.6 mm 5μ column; hexane/2-propanol = 80:20, detected at 280 nm, Flow rate = 1 mL/min, Retention times: 18.64 min (minor), 20.37 min (major).

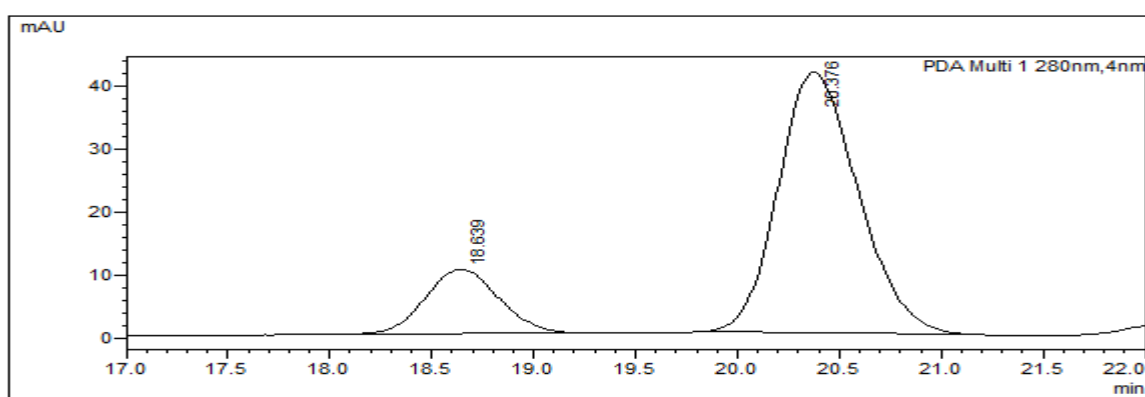

<Peak Table>

| PDACh1 280nm |           |         |        |         |         |
|--------------|-----------|---------|--------|---------|---------|
| Peak#        | Ret. Time | Area    | Height | Area%   | Height% |
| 1            | 18.639    | 207841  | 9498   | 15.001  | 18.459  |
| 2            | 20.376    | 1177659 | 41956  | 84.999  | 81.541  |
| Total        |           | 1385500 | 51453  | 100.000 | 100.000 |

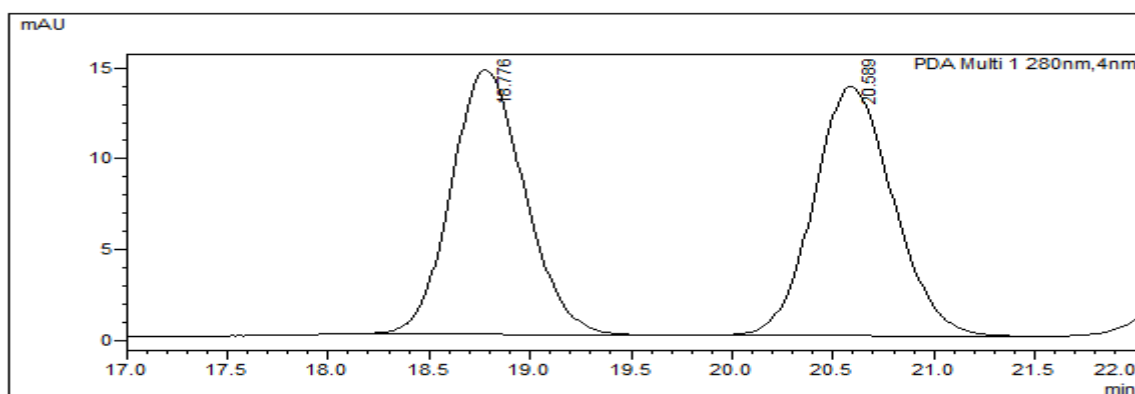

<Peak Table>

| PDACh1 280nm |           |        |        |         |         |
|--------------|-----------|--------|--------|---------|---------|
| Peak#        | Ret. Time | Area   | Height | Area%   | Height% |
| 1            | 18.776    | 367629 | 14570  | 49.537  | 51.453  |
| 2            | 20.589    | 374508 | 13747  | 50.463  | 48.547  |
| Total        |           | 742137 | 28317  | 100.000 | 100.000 |

(2*S*,7*aR*)2-Ethoxy-7*a*-methyl-7-oxo-2,4,5,6,7*a*-hexahydro-1*H*-indene-3-carbaldehyde (2b):

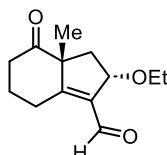

Prepared according to the general procedure as described above in 94% yield (62 mg; *dr* = 10:1). It was purified by flash chromatography (30% EtOAc/hexane; *R<sub>f</sub>* = 0.5) to afford yellow liquid; <sup>1</sup>H NMR (400 MHz, CDCl<sub>3</sub>) δ 9.91 (s, 1H), 4.79 (ddd, *J* = 8.0, 5.5, 2.7 Hz, 1H), 3.59 (q, *J* = 7.0 Hz, 2H), 3.39 (dt, *J* = 14.7, 4.3 Hz, 1H), 2.69 (ddd, *J* = 15.5, 13.3, 6.1 Hz, 1H), 2.54 – 2.47 (m, 1H), 2.47 – 2.41 (m, 1H), 2.38 (dd, *J* = 14.0, 5.6 Hz, 1H), 2.27 – 2.17 (m, 1H), 2.13 (dd, *J* = 14.0, 7.3 Hz, 1H), 1.82 – 1.66

(m, 1H), 1.35 (s, 3H), 1.18 (t,  $J = 7.0$  Hz, 3H);  $^{13}\text{C}$  NMR (101 MHz,  $\text{CDCl}_3$ )  $\delta$  210.7, 188.8, 166.1, 135.7, 79.8, 65.2, 62.1, 39.2, 37.5, 26.4, 23.9, 22.9, 15.7; HRMS (ESI) calcd for  $\text{C}_{13}\text{H}_{19}\text{O}_3$   $[\text{M}+\text{H}]^+$ : 223.1328; found: 223.1320;  $[\alpha]^{20}_{\text{D}} = -137.20^\circ$  ( $c$  1.0,  $\text{CHCl}_3$ ); 99:1er; Chiral HPLC analysis of the product: Daicel Chiralpak IC 250X4.6 mm 5 $\mu$  column; hexane/2-propanol = 80:20, detected at 240 nm, Flow rate = 1 mL/min, Retention times: 8.75 min (minor), 11.75 min (major).

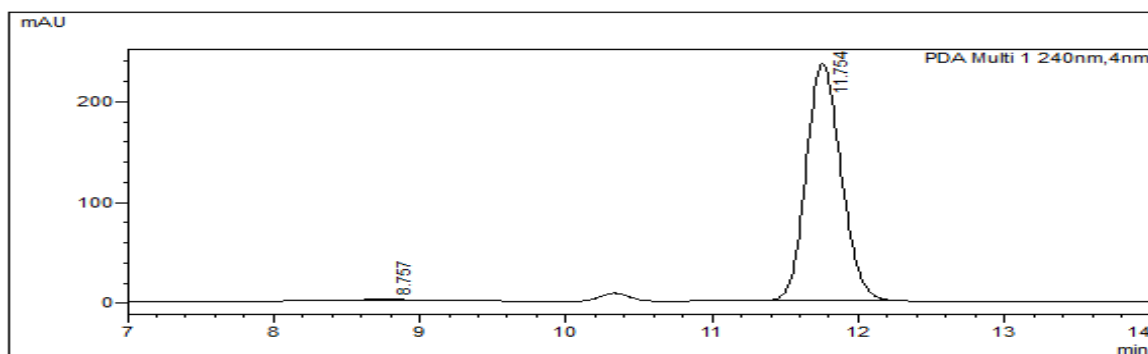

<Peak Table>

| PDACh1 240nm |           |         |        |         |         |
|--------------|-----------|---------|--------|---------|---------|
| Peak#        | Ret. Time | Area    | Height | Area%   | Height% |
| 1            | 8.757     | 52116   | 1194   | 1.317   | 0.505   |
| 2            | 11.754    | 3903953 | 235268 | 98.683  | 99.495  |
| Total        |           | 3956069 | 236462 | 100.000 | 100.000 |

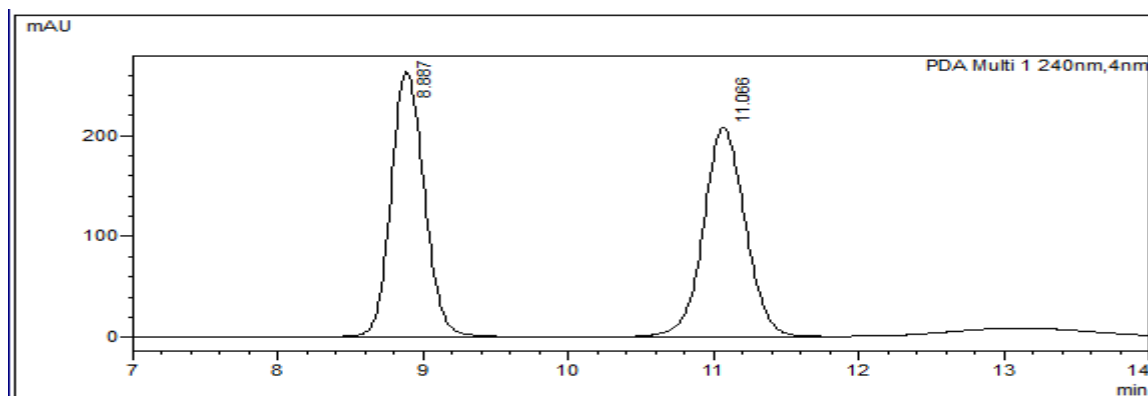

<Peak Table>

| PDACh1 240nm |           |         |        |         |         |
|--------------|-----------|---------|--------|---------|---------|
| Peak#        | Ret. Time | Area    | Height | Area%   | Height% |
| 1            | 8.887     | 4192839 | 263403 | 49.958  | 55.883  |
| 2            | 11.066    | 4199831 | 207940 | 50.042  | 44.117  |
| Total        |           | 8392670 | 471343 | 100.000 | 100.000 |

(2S,7aR)-2-Isopropoxy-7a-methyl-7-oxo-2,4,5,6,7,7a-hexahydro-1H-indene-3-carbaldehyde (2c):

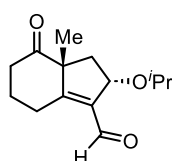

Prepared according to the general procedure as described above in 52% yield (36 mg;  $dr = >20:1$ ). It was purified by flash chromatography (20% EtOAc/hexane;  $R_f = 0.5$ ) to afford yellow liquid;  $^1\text{H}$  NMR (400 MHz,  $\text{CDCl}_3$ )  $\delta$  9.90 (s, 1H), 4.85 – 4.77 (m, 1H), 3.90 – 3.78 (m, 1H), 3.38 (d,  $J = 14.7$  Hz, 1H), 2.74 – 2.62 (m, 1H), 2.54 – 2.39 (m, 2H), 2.33 (dd,  $J = 13.9, 5.7$  Hz, 1H), 2.23 – 2.11 (m, 2H), 1.85 – 1.70 (m, 1H), 1.34 (s, 3H), 1.17 (d,  $J = 6.0$  Hz, 3H), 1.16 (d,  $J = 6.1$  Hz, 3H);  $^{13}\text{C}$  NMR (101 MHz,  $\text{CDCl}_3$ )  $\delta$  210.9, 188.8, 165.4, 136.1, 78.2, 72.1, 61.9, 40.7, 37.6, 26.4, 23.8, 23.3, 22.9, 22.4; HRMS (ESI) calcd for  $\text{C}_{14}\text{H}_{20}\text{O}_3$  [M] $^+$ : 236.1412; found: 236.1413;  $[\alpha]_D^{20} = -110.30^\circ$  ( $c$  1.0,  $\text{CHCl}_3$ ); 95:5 $er$ ; Chiral HPLC analysis of the product: Daicel Chiralpak IC 250X4.6 mm  $5\mu$  column; hexane/2-propanol = 80:20, detected at 247 nm, Flow rate = 1 mL/min, Retention times: 8.48 min (major), 11.12 min (minor).

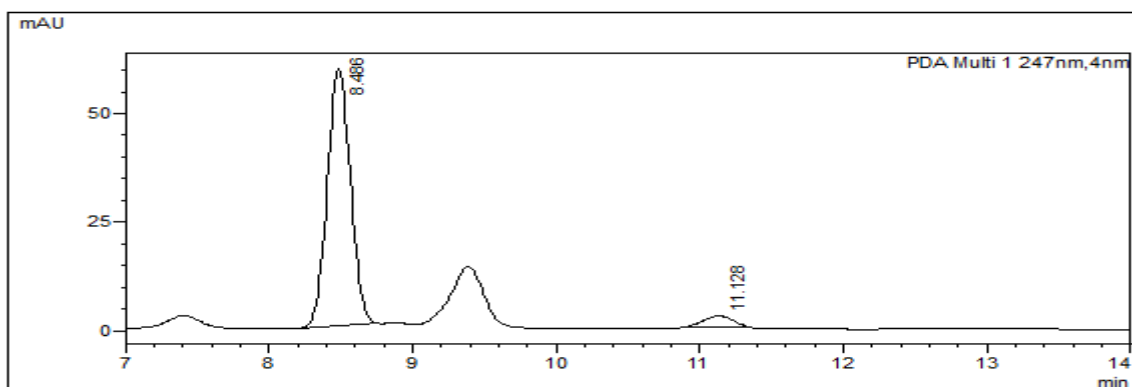

<Peak Table>

| PDA Ch1 247nm |           |        |        |         |         |
|---------------|-----------|--------|--------|---------|---------|
| Peak#         | Ret. Time | Area   | Height | Area%   | Height% |
| 1             | 8.486     | 664557 | 59254  | 94.987  | 95.963  |
| 2             | 11.128    | 35072  | 2493   | 5.013   | 4.037   |
| Total         |           | 699630 | 61747  | 100.000 | 100.000 |

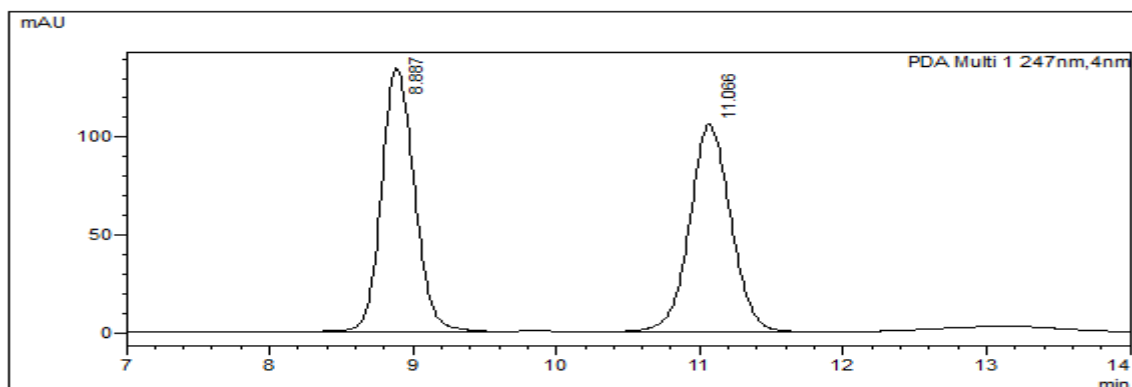

<Peak Table>

| PDA Ch1 247nm |           |         |        |         |         |
|---------------|-----------|---------|--------|---------|---------|
| Peak#         | Ret. Time | Area    | Height | Area%   | Height% |
| 1             | 8.887     | 2153812 | 134881 | 50.404  | 56.007  |
| 2             | 11.066    | 2119308 | 105947 | 49.596  | 43.993  |
| Total         |           | 4273120 | 240828 | 100.000 | 100.000 |

**(2*S*,7*aR*)2-Ethoxy-7-oxo-7*a*-propyl-2,4,5,6,7,7*a*-hexahydro-1*H*-indene-3-carbaldehyde (2d):**

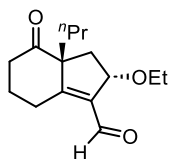

Prepared according to the general procedure as described above in 76% yield (57 mg; *dr* = 18:1). It was purified by flash chromatography (40% EtOAc/hexane; *R<sub>f</sub>* = 0.4) to afford yellow liquid; <sup>1</sup>H NMR (400 MHz, CDCl<sub>3</sub>) δ 9.92 (s, 1H), 4.75 (ddd, *J* = 7.7, 5.3, 2.7 Hz, 1H), 3.58 (qd, *J* = 7.0, 1.6 Hz, 2H), 3.39 (dt, *J* = 14.5, 4.1 Hz, 1H), 2.67 (ddd, *J* = 15.2, 13.5, 6.2 Hz, 1H), 2.50 – 2.40 (m, 2H), 2.35 (dd, *J* = 14.3, 5.3 Hz, 1H), 2.26 – 2.11 (m, 2H), 1.81 – 1.67 (m, 2H), 1.55 – 1.47 (m, 1H), 1.35 – 1.21 (m, 1H), 1.18 (t, *J* = 7.0 Hz, 3H), 1.13 – 1.03 (m, 1H), 0.90 (t, *J* = 7.3 Hz, 3H); <sup>13</sup>C NMR (101 MHz, CDCl<sub>3</sub>) δ 210.2, 187.9, 168.5, 136.3, 79.1, 68.3, 65.5, 41.0, 38.1, 34.5, 24.4, 23.2, 18.4, 15.7, 14.5; HRMS (ESI) calcd for C<sub>15</sub>H<sub>23</sub>O<sub>3</sub> [M+H]<sup>+</sup>: 251.1641; found: 251.1634; [α]<sub>D</sub><sup>20</sup> = +87.60° (*c* 1.0, CHCl<sub>3</sub>); 93:7% *er*; Chiral HPLC analysis of the product: Daicel Chiralpak OD-H 250X4.6 mm 5μ column; hexane/2-propanol = 80:20, detected at 254 nm, Flow rate = 1 mL/min, Retention times: 5.45 min (major), 5.97 min (minor).

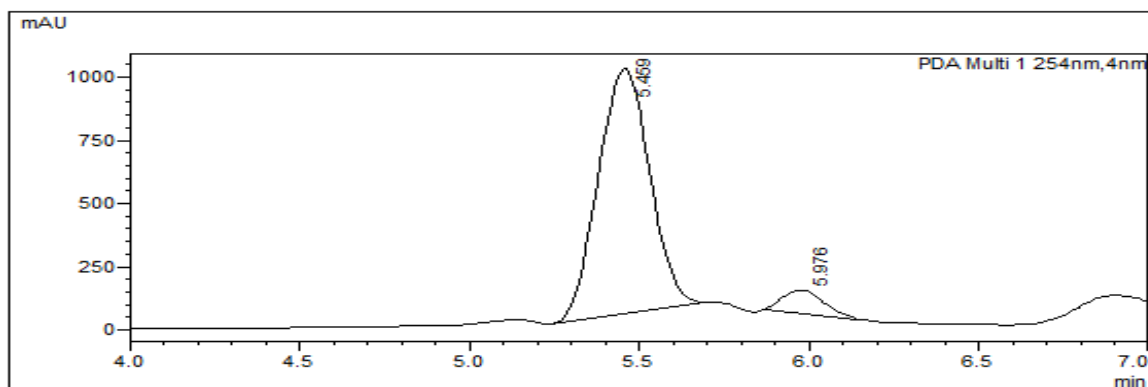

**<Peak Table>**

| PDA Ch1 254nm |           |          |         |         |         |
|---------------|-----------|----------|---------|---------|---------|
| Peak#         | Ret. Time | Area     | Height  | Area%   | Height% |
| 1             | 5.459     | 10319502 | 968758  | 92.982  | 91.158  |
| 2             | 5.976     | 778895   | 93966   | 7.018   | 8.842   |
| Total         |           | 11098397 | 1062725 | 100.000 | 100.000 |

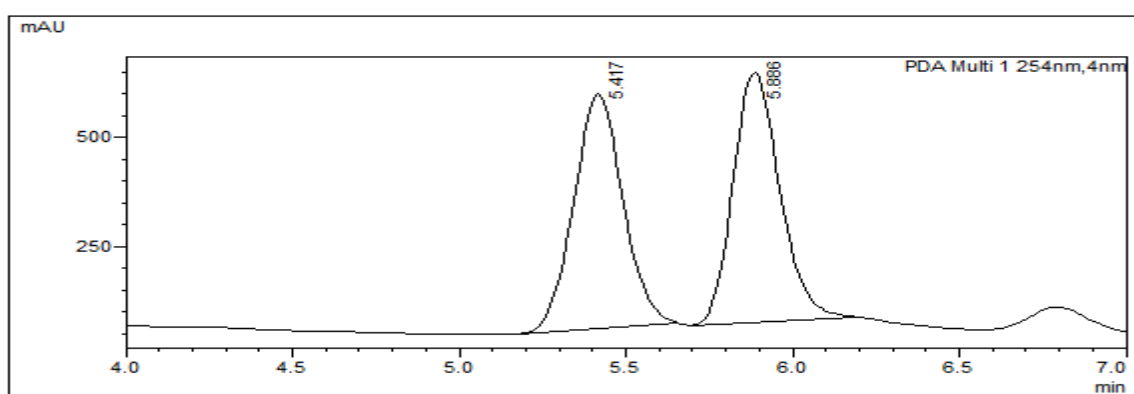

<Peak Table>

| PDA Ch1 254nm |           |          |         |         |         |
|---------------|-----------|----------|---------|---------|---------|
| Peak#         | Ret. Time | Area     | Height  | Area%   | Height% |
| 1             | 5.417     | 5520956  | 539871  | 49.754  | 48.546  |
| 2             | 5.886     | 5575543  | 572203  | 50.246  | 51.454  |
| Total         |           | 11096499 | 1112073 | 100.000 | 100.000 |

**(2*S*,7*aR*) 7a-(Cyclohexylmethyl)-2-ethoxy-7-oxo-2,4,5,6,7,7a-hexahydro-1*H*-indene-3-carbaldehyde (2e):**

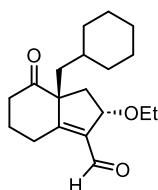

Prepared according to the general procedure as described above in 72% yield (65 mg; *dr* = >20:1). It was purified by flash chromatography (30% EtOAc/hexane; *R<sub>f</sub>* = 0.5) to afford colourless liquid; <sup>1</sup>H NMR (400 MHz, CDCl<sub>3</sub>) δ 9.90 (s, 1H), 4.75 (ddd, *J* = 7.6, 5.1, 2.6 Hz, 1H), 3.62 – 3.53 (m, 2H), 3.37 (dt, *J* = 14.5, 2.7 Hz, 1H), 2.70 (ddd, *J* = 14.8, 13.7, 6.2 Hz, 1H), 2.55 – 2.43 (m, 2H), 2.40 (dd, *J* = 14.3, 5.1 Hz, 1H), 2.24 – 2.15 (m, 1H), 2.18 (dd, *J* = 14.3, 7.5 Hz, 1H), 1.80 (dd, *J* = 14.0, 5.3 Hz, 1H), 1.72 (ddd, *J* = 13.4, 11.2, 6.7 Hz, 1H), 1.66 – 1.52 (m, 5H), 1.34 (dd, *J* = 14.1, 6.0 Hz, 1H), 1.30 – 1.20 (m, 2H), 1.17 (t, *J* = 7.0 Hz, 3H), 1.14 – 1.00 (m, 2H), 0.97 – 0.83 (m, 2H); <sup>13</sup>C NMR (101 MHz, CDCl<sub>3</sub>) δ 209.9, 188.6, 166.3, 136.0, 80.1, 67.3, 65.1, 46.1, 38.2, 36.2, 35.0, 34.8, 34.7, 26.3 (2C), 26.1, 24.7, 23.2, 15.7; HRMS (ESI) calcd for C<sub>19</sub>H<sub>29</sub>O<sub>3</sub> [M+H]<sup>+</sup>: 305.2111; found: 305.2110; [α]<sub>D</sub><sup>20</sup> = -127.79° (*c* 1.0, CHCl<sub>3</sub>); 91:9*er*; Chiral HPLC analysis of the product: Daicel Chiralpak IC 250X4.6 mm 5μ column; hexane/2-propanol = 98:02, detected at 254 nm, Flow rate = 1 mL/min, Retention times: 32.77 min (minor), 45.37 min (major).

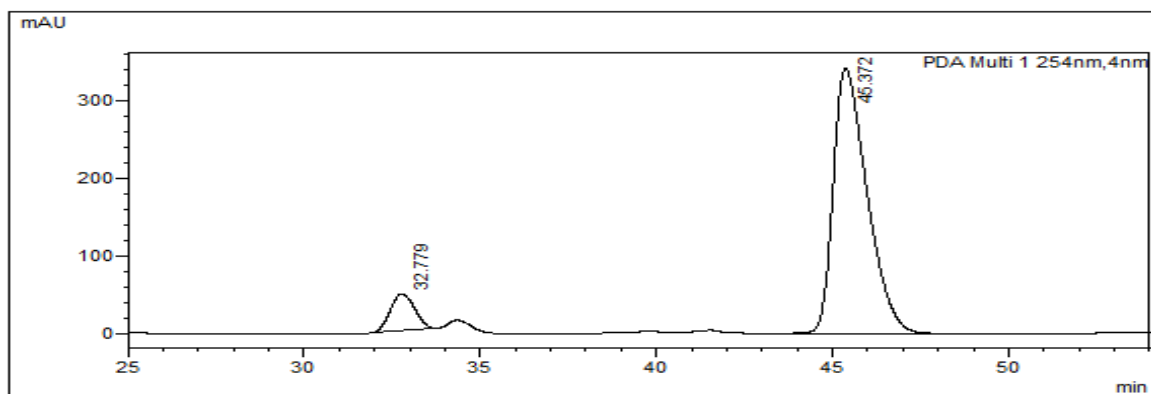

<Peak Table>

| PDA Ch1 254nm |           |          |        |         |         |
|---------------|-----------|----------|--------|---------|---------|
| Peak#         | Ret. Time | Area     | Height | Area%   | Height% |
| 1             | 32.779    | 2266247  | 47407  | 9.071   | 12.218  |
| 2             | 45.372    | 22718224 | 340589 | 90.929  | 87.782  |
| Total         |           | 24984471 | 387996 | 100.000 | 100.000 |

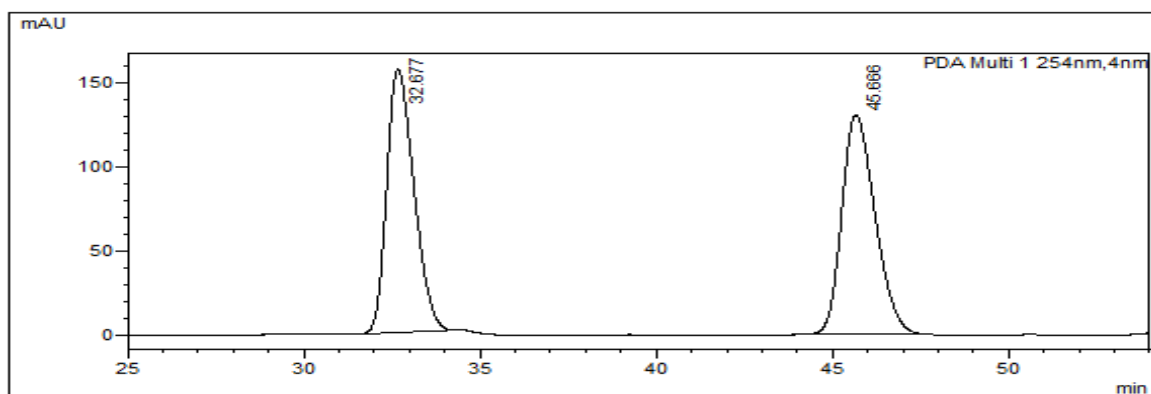

<Peak Table>

| PDA Ch1 254nm |           |          |        |         |         |
|---------------|-----------|----------|--------|---------|---------|
| Peak#         | Ret. Time | Area     | Height | Area%   | Height% |
| 1             | 32.677    | 8358339  | 155933 | 49.695  | 54.601  |
| 2             | 45.666    | 8460942  | 129655 | 50.305  | 45.399  |
| Total         |           | 16819280 | 285588 | 100.000 | 100.000 |

(2*S*,7*aR*)-7*a*-Allyl-2-ethoxy-7-oxo-2,4,5,6,7,7*a*-hexahydro-1*H*-indene-3-carbaldehyde (**2f**):

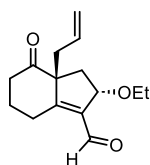

Prepared according to the general procedure as described above in 78% yield (58 mg; *dr* = >5:1). It was purified by flash chromatography (30% EtOAc/hexane; *R<sub>f</sub>* = 0.4) to afford yellow liquid; <sup>1</sup>H NMR (400 MHz, CDCl<sub>3</sub>) δ 9.91 (s, 1H), 5.59 – 5.44 (m, 1H), 5.17 – 5.08 (m, 1H), 4.74 – 4.67 (m, 1H), 3.58 (qd, *J* = 7.0, 1.0 Hz, 2H), 3.42 (dt, *J* = 14.7, 2.6 Hz, 1H), 2.72 – 2.61 (m, 1H), 2.53 – 2.36 (m, 5H), 2.35 – 2.19 (m, 3H), 1.85 – 1.66 (m, 1H), 1.18 (t, *J* = 7.0 Hz, 3H); <sup>13</sup>C NMR (101 MHz, CDCl<sub>3</sub>) δ

209.3, 188.5, 164.2, 136.8, 131.3, 119.9, 80.1, 66.8, 65.3, 42.4, 37.9, 36.1, 24.0, 23.0, 15.7; HRMS (ESI) calcd for  $C_{15}H_{21}O_3$   $[M+H]^+$ : 249.1485; found: 249.1493;  $[\alpha]^{20}_D = +61.00^\circ$  (*c* 1.0,  $CHCl_3$ ); 97:3*er*; Chiral HPLC analysis of the product: Daicel Chiralpak OD-H 250X4.6 mm 5 $\mu$  column; hexane/2-propanol = 80:20, detected at 254 nm, Flow rate = 1 mL/min, Retention times: 6.14 min (major), 7.07 min (minor).

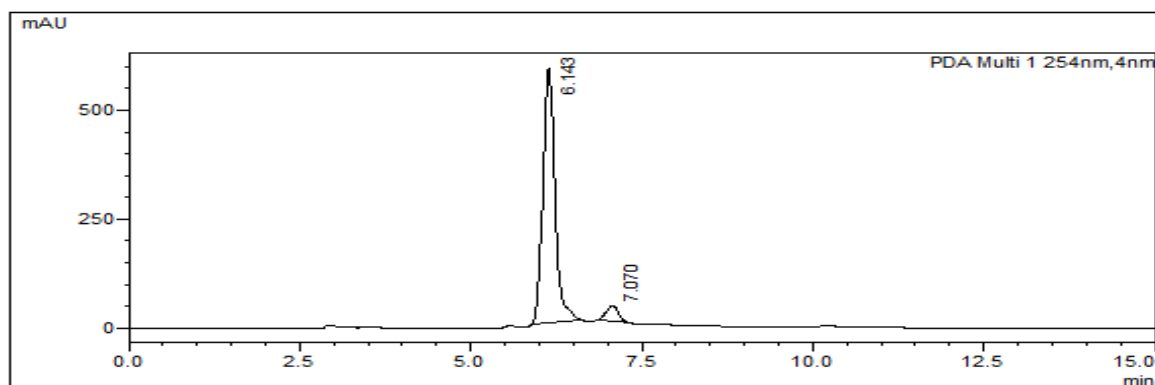

<Peak Table>

| PDACH1 254nm |           |         |        |         |         |
|--------------|-----------|---------|--------|---------|---------|
| Peak#        | Ret. Time | Area    | Height | Area%   | Height% |
| 1            | 6.143     | 7241744 | 585854 | 96.729  | 95.754  |
| 2            | 7.070     | 244910  | 25981  | 3.271   | 4.246   |
| Total        |           | 7486654 | 611835 | 100.000 | 100.000 |

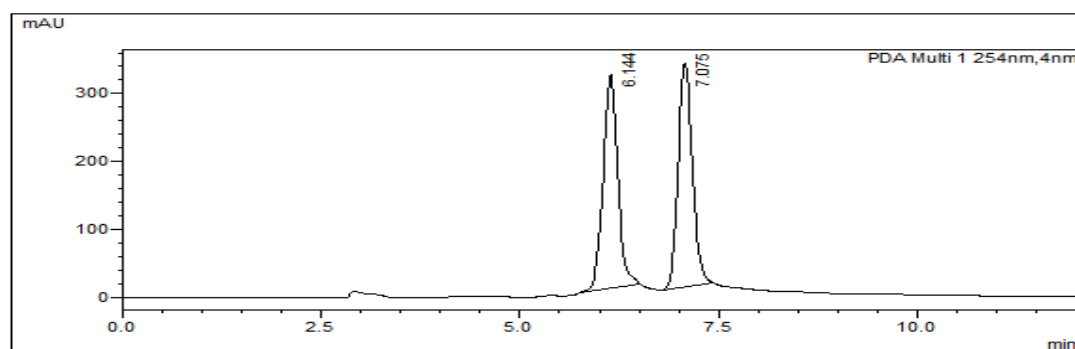

<Peak Table>

| PDACH1 254nm |           |         |        |         |         |
|--------------|-----------|---------|--------|---------|---------|
| Peak#        | Ret. Time | Area    | Height | Area%   | Height% |
| 1            | 6.144     | 4033603 | 314394 | 49.579  | 48.855  |
| 2            | 7.075     | 4102059 | 329132 | 50.421  | 51.145  |
| Total        |           | 8135662 | 643526 | 100.000 | 100.000 |

**(2*S*,7*aR*)-7*a*-Benzyl-2-ethoxy-7-oxo-2,4,5,6,7,7*a*-hexahydro-1*H*-indene-3-carbaldehyde (2g):**

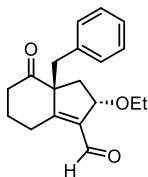

Prepared according to the general procedure as described above in 88% yield (78 mg; *dr* = >5:1). It was purified by column chromatography (30% EtOAc/hexane; *R<sub>f</sub>* = 0.5) to afford brown liquid; <sup>1</sup>H NMR (400 MHz, CDCl<sub>3</sub>) δ 9.80 (s, 1H), 7.26 – 7.23 (m, 3H), 7.02 – 6.98 (m, 2H), 3.78 (td, *J* = 6.9, 2.8 Hz, 1H), 3.56 – 3.49 (m, 1H), 3.45 – 3.35 (m, 2H), 3.06 (d, *J* = 13.3 Hz, 1H), 2.86 (d, *J* = 13.3 Hz, 1H), 2.78 (ddd, *J* = 15.5, 10.2, 4.7 Hz, 1H), 2.69 – 2.59 (m, 1H), 2.54 (dt, *J* = 15.5, 3.8 Hz, 1H), 2.35 (dd, *J* = 14.0, 7.2 Hz, 1H), 2.31 – 2.22 (m, 1H), 2.14 (dd, *J* = 14.0, 6.2 Hz, 1H), 1.82 (ddt, *J* = 26.2, 13.2, 4.4 Hz, 1H), 1.08 (t, *J* = 7.0 Hz, 3H); <sup>13</sup>C NMR (101 MHz, CDCl<sub>3</sub>) δ 210.2, 188.7, 162.8, 138.0, 135.2, 130.1, 128.5, 127.6, 79.7, 67.4, 65.2, 43.5, 38.4, 36.8, 24.0, 23.5, 15.6; HRMS (ESI) calcd for C<sub>19</sub>H<sub>23</sub>O<sub>3</sub> [M+H]<sup>+</sup>: 299.1641; found: 299.1634; [α]<sub>D</sub><sup>20</sup> = -73.43° (c 1.0, CHCl<sub>3</sub>); 96:4 *er*; Chiral HPLC analysis of the product: Daicel Chiralpak IC 250X4.6 mm 5μ column; hexane/2-propanol = 70:30, detected at 254 nm, Flow rate = 1 mL/min, Retention times: 7.97 min (minor), 8.32 min (major).

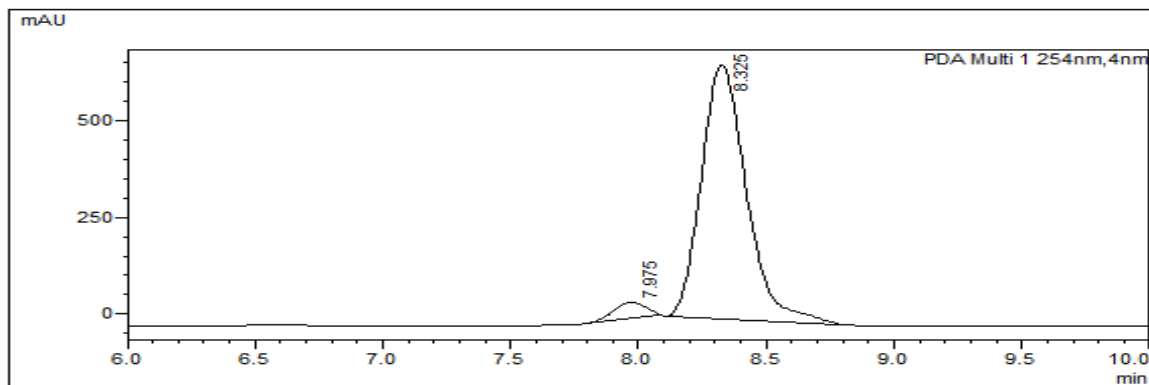

<Peak Table>

| PDA Ch1 254nm |           |         |        |         |         |
|---------------|-----------|---------|--------|---------|---------|
| Peak#         | Ret. Time | Area    | Height | Area%   | Height% |
| 1             | 7.975     | 370640  | 41426  | 4.437   | 5.959   |
| 2             | 8.325     | 7982312 | 653727 | 95.563  | 94.041  |
| Total         |           | 8352952 | 695153 | 100.000 | 100.000 |

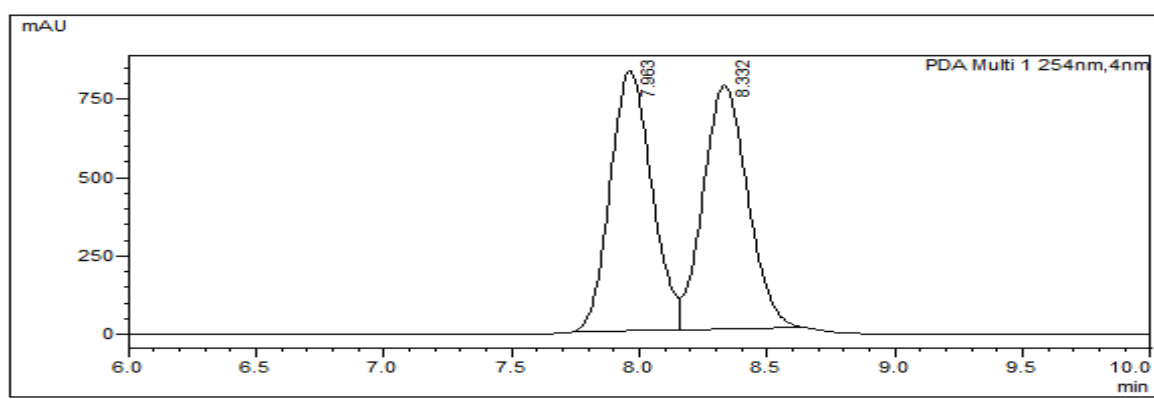

<Peak Table>

| Peak# | Ret. Time | Area     | Height  | Area%   | Height% |
|-------|-----------|----------|---------|---------|---------|
| 1     | 7.963     | 9436081  | 829354  | 50.061  | 51.525  |
| 2     | 8.332     | 9413034  | 780260  | 49.939  | 48.475  |
| Total |           | 18849114 | 1609614 | 100.000 | 100.000 |

**(2*S*,7*aR*)-2-Ethoxy-7*a*-(4-methylbenzyl)-7-oxo-2,4,5,6,7,7*a*-hexahydro-1*H*-indene-3-carbaldehyde (2h):**

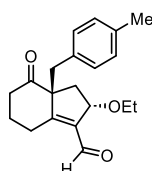

Prepared according to the general procedure as described above in 80% yield (74 mg; *dr* = >20:1). It was purified by column chromatography (40% EtOAc/hexane;  $R_f$  = 0.4) to afford colourless liquid;  $^1\text{H}$  NMR (400 MHz,  $\text{CDCl}_3$ )  $\delta$  9.81 (s, 1H), 7.05 (d,  $J$  = 7.8 Hz, 2H), 6.88 (d,  $J$  = 8.0 Hz, 2H), 3.85 (td,  $J$  = 7.0, 2.8 Hz, 1H), 3.51 (dt,  $J$  = 16.6, 4.0 Hz, 1H), 3.41 (tdd,  $J$  = 9.1, 7.0, 2.1 Hz, 2H), 3.02 (d,  $J$  = 13.3 Hz, 1H), 2.83 (d,  $J$  = 13.3 Hz, 1H), 2.78 (ddd,  $J$  = 15.5, 13.2, 6.0 Hz, 1H), 2.63 (dddd,  $J$  = 15.3, 12.7, 5.4, 2.9 Hz, 1H), 2.53 (dt,  $J$  = 15.5, 3.2 Hz, 1H), 2.34 (dd,  $J$  = 14.0, 7.2 Hz, 1H), 2.31 (s, 3H), 2.29 – 2.21 (m, 1H), 2.13 (dd,  $J$  = 14.0, 6.2 Hz, 1H), 1.81 (ddt,  $J$  = 26.3, 13.2, 4.4 Hz, 1H), 1.09 (t,  $J$  = 7.0 Hz, 3H);  $^{13}\text{C}$  NMR (101 MHz,  $\text{CDCl}_3$ )  $\delta$  210.3, 188.7, 163.2, 137.9, 137.3, 132.0, 129.9, 129.2, 79.8, 67.6, 65.1, 43.2, 38.4, 36.7, 24.0, 23.5, 21.2, 15.6; HRMS (ESI) calcd for  $\text{C}_{20}\text{H}_{25}\text{O}_3$   $[\text{M}+\text{H}]^+$ : 313.1798; found: 313.1792;  $[\alpha]_D^{20}$  = -23.39° (*c* 1.0,  $\text{CHCl}_3$ ); 96:4*er*; Chiral HPLC analysis of the product: Daicel Chiralpak IC 250X4.6 mm 5 $\mu$  column; hexane/2-propanol = 80:20, detected at 254 nm, Flow rate = 1 mL/min, Retention times: 11.66 min (minor), 12.38 min(major).

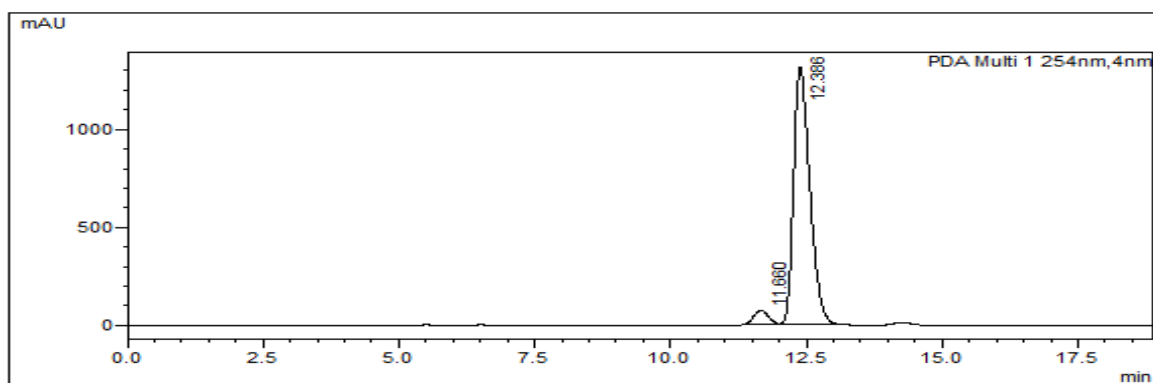

<Peak Table>

| PDA Ch1 254nm |           |          |         |         |         |
|---------------|-----------|----------|---------|---------|---------|
| Peak#         | Ret. Time | Area     | Height  | Area%   | Height% |
| 1             | 11.660    | 1273753  | 72038   | 4.486   | 5.217   |
| 2             | 12.386    | 27119496 | 1308764 | 95.514  | 94.783  |
| Total         |           | 28393249 | 1380802 | 100.000 | 100.000 |

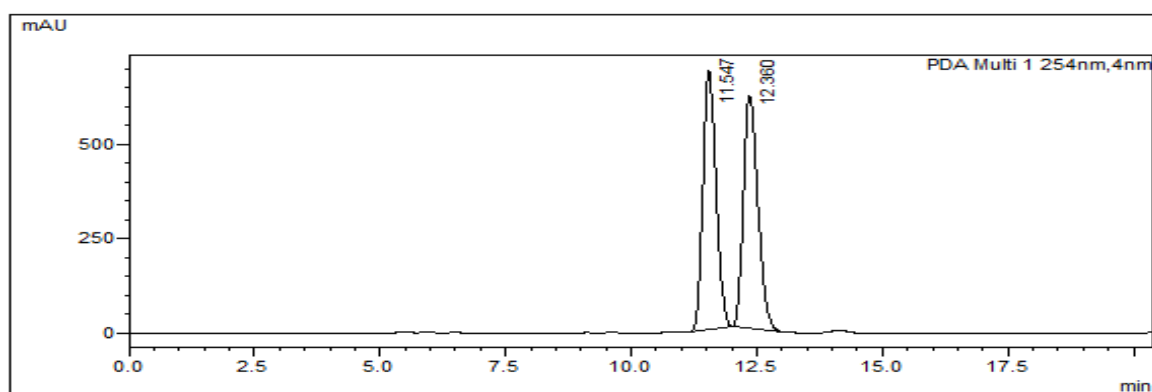

<Peak Table>

| PDA Ch1 254nm |           |          |         |         |         |
|---------------|-----------|----------|---------|---------|---------|
| Peak#         | Ret. Time | Area     | Height  | Area%   | Height% |
| 1             | 11.547    | 12497808 | 685877  | 50.319  | 52.681  |
| 2             | 12.360    | 12339592 | 616061  | 49.681  | 47.319  |
| Total         |           | 24837399 | 1301938 | 100.000 | 100.000 |

(2*S*,7*aR*)-2-Ehoxy-7*a*-(4-fluorobenzyl)-7-oxo-2,4,5,6,7,7*a*-hexahydro-1*H*-indene-3-carbaldehyde (2i):

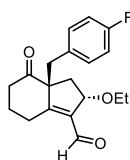

Prepared according to the general procedure as described above in 71% yield (67 mg; *dr* = >20:1). It was purified by flash chromatography (40% EtOAc/hexane; *R<sub>f</sub>* = 0.3) to afford yellow liquid; <sup>1</sup>H NMR (500 MHz, CDCl<sub>3</sub>) δ 9.81 (s, 1H), 7.00 – 6.91 (m, 4H), 3.84 (td, *J* = 6.9, 2.9 Hz, 1H), 3.53 (dt, *J* = 13.7, 3.1 Hz, 1H), 3.48 – 3.37 (m, 2H), 3.02 (d, *J* = 13.5 Hz, 1H), 2.85 (d, *J* = 13.5 Hz, 1H), 2.76 (ddd, *J* = 15.5, 13.2, 6.0 Hz, 1H), 2.65 – 2.57 (m, 1H), 2.57 – 2.52 (m, 1H), 2.30 (dd, *J* = 14.1, 7.2 Hz, 1H),

2.28 – 2.23 (m, 1H), 2.15 (dd,  $J = 14.1, 6.2$  Hz, 1H), 1.83 (ddt,  $J = 26.3, 13.2, 4.4$  Hz, 1H), 1.10 (t,  $J = 7.0$  Hz, 3H);  $^{13}\text{C}$  NMR (126 MHz,  $\text{CDCl}_3$ )  $\delta$  209.6, 187.9, 168.4, 162.19 (d,  $J_{\text{CF}} = 247.23$  Hz), 137.1, 132.2 (d,  $J_{\text{CF}} = 2.7$  Hz), 131.5 (d,  $J_{\text{CF}} = 7.42$  Hz), 115.5 (d,  $J_{\text{CF}} = 21.33$  Hz), 78.7, 68.7, 65.6, 44.1, 38.9, 34.7, 24.4, 23.7, 15.7;  $^{19}\text{F}$  NMR (471 MHz,  $\text{CDCl}_3$ )  $\delta$  -113.21. HRMS (ESI) calcd for  $\text{C}_{19}\text{H}_{22}\text{O}_3\text{F}$   $[\text{M}+\text{H}]^+$ : 317.1547; found: 317.1552;  $[\alpha]^{20}_{\text{D}} = +62.09^\circ$  (c1.0,  $\text{CHCl}_3$ ); 91:9er; Chiral HPLC analysis of the product: Daicel Chiralpak IC 250X4.6 mm  $5\mu$  column; hexane/2-propanol = 90:10, detected at 254 nm, Flow rate = 1 mL/min, Retention times: 16.88 min (major), 24.52 min (minor).

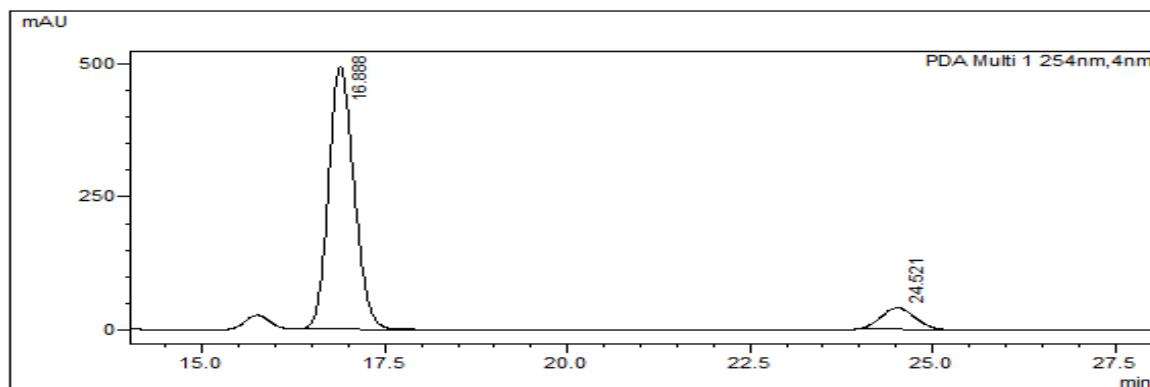

<Peak Table>

| PDA Ch1 254nm |           |          |        |         |         |
|---------------|-----------|----------|--------|---------|---------|
| Peak#         | Ret. Time | Area     | Height | Area%   | Height% |
| 1             | 16.888    | 12000018 | 492343 | 91.383  | 92.873  |
| 2             | 24.521    | 1131562  | 37780  | 8.617   | 7.127   |
| Total         |           | 13131580 | 530123 | 100.000 | 100.000 |

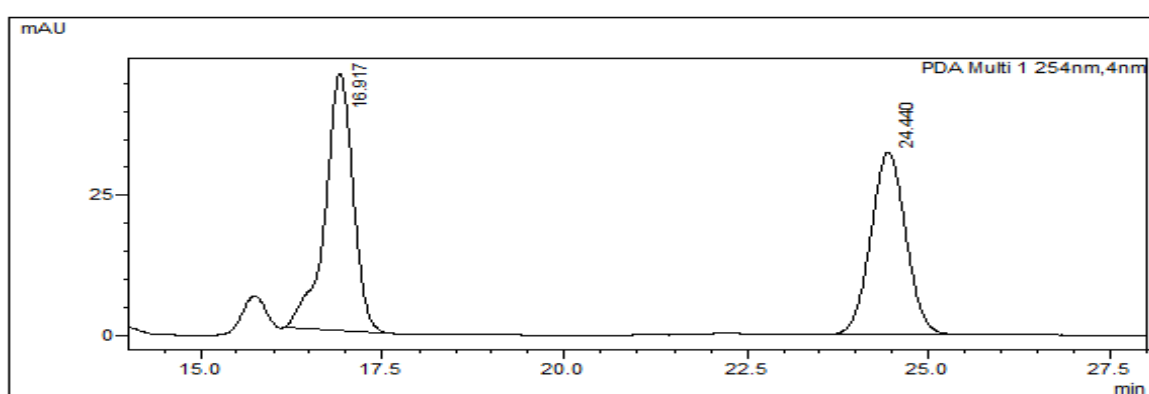

<Peak Table>

| PDA Ch1 254nm |           |         |        |         |         |
|---------------|-----------|---------|--------|---------|---------|
| Peak#         | Ret. Time | Area    | Height | Area%   | Height% |
| 1             | 16.917    | 1104225 | 44343  | 50.471  | 57.679  |
| 2             | 24.440    | 1083618 | 32536  | 49.529  | 42.321  |
| Total         |           | 2187843 | 76879  | 100.000 | 100.000 |

**(2*S*,7*aR*)-7*a*-(4-Chlorobenzyl)-2-ethoxy-7-oxo-2,4,5,6,7,7*a*-hexahydro-1*H*-indene-3-carbaldehyde (2j):**

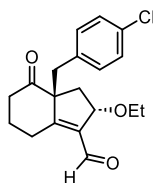

Prepared according to the general procedure as described above in 77% yield (76 mg; *dr* = >20:1). It was purified by flash chromatography (30% EtOAc/hexane; *R<sub>f</sub>* = 0.4) to afford colourless liquid; <sup>1</sup>H NMR (500 MHz, CDCl<sub>3</sub>) δ 9.81 (s, 1H), 7.24 (d, *J* = 8.2 Hz, 2H), 6.94 (d, *J* = 8.3 Hz, 2H), 3.90 (td, *J* = 6.9, 2.7 Hz, 1H), 3.54 (dt, *J* = 14.7, 3.7 Hz, 1H), 3.49 – 3.37 (m, 2H), 3.01 (d, *J* = 13.4 Hz, 1H), 2.86 (d, *J* = 13.5 Hz, 1H), 2.76 (ddd, *J* = 15.4, 13.2, 5.9 Hz, 1H), 2.65 – 2.58 (m, 1H), 2.58 – 2.51 (m, 1H), 2.29 (dd, *J* = 14.1, 7.2 Hz, 1H), 2.26 – 2.22 (m, 1H), 2.16 (dd, *J* = 14.2, 6.1 Hz, 1H), 1.82 (tdd, *J* = 17.3, 8.8, 4.2 Hz, 1H), 1.10 (t, *J* = 7.0 Hz, 3H); <sup>13</sup>C NMR (101 MHz, CDCl<sub>3</sub>) δ 209.9, 188.9, 162.3, 137.9, 133.8, 133.7, 131.3, 128.7, 79.8, 67.3, 65.2, 42.7, 38.3, 36.7, 24.0, 23.5, 15.6; HRMS (ESI) calcd for C<sub>19</sub>H<sub>22</sub>O<sub>3</sub>Cl [M+H]<sup>+</sup>: 333.1252; found: 333.1263; [α]<sub>D</sub><sup>20</sup> = +17.33° (*c* 1.0, CHCl<sub>3</sub>); 93:7*er*; Chiral HPLC analysis of the product: Daicel Chiralpak AD-H 250X4.6 mm 5μ column; hexane/2-propanol = 90:10, detected at 254 nm, Flow rate = 1mL/min, Retention times: 17.21 min (major), 19.48 min (minor).

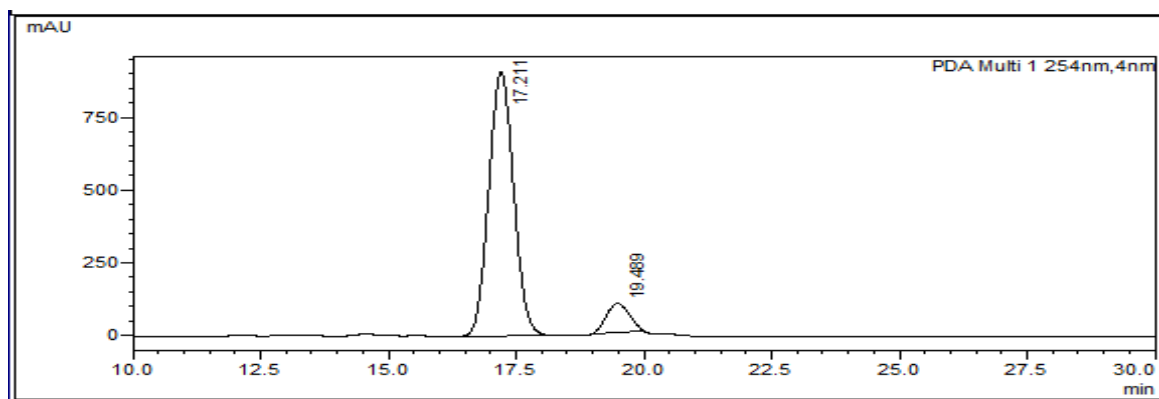

**Peak Table**

| PDA Ch1 254nm |           |          |        |         |         |
|---------------|-----------|----------|--------|---------|---------|
| Peak#         | Ret. Time | Area     | Height | Area%   | Height% |
| 1             | 17.211    | 30694502 | 906895 | 92.912  | 91.483  |
| 2             | 19.489    | 2341462  | 84432  | 7.088   | 8.517   |
| Total         |           | 33035963 | 991327 | 100.000 | 100.000 |

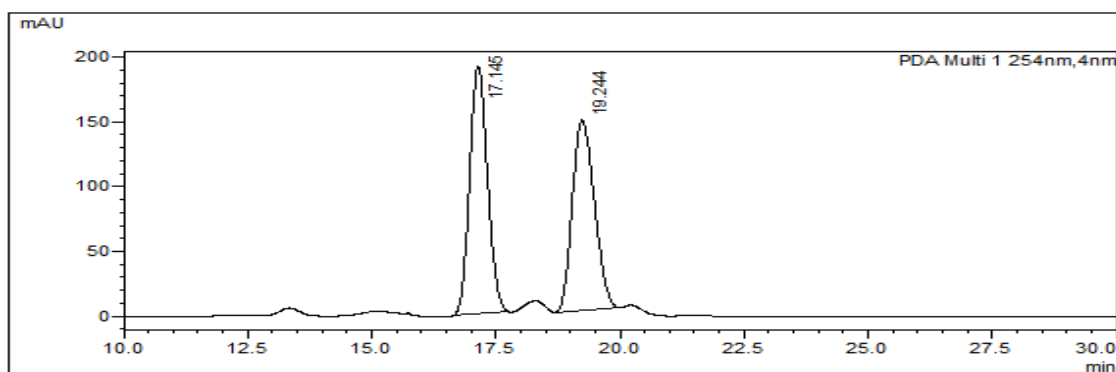

<Peak Table>

| Peak# | Ret. Time | Area    | Height | Area%   | Height% |
|-------|-----------|---------|--------|---------|---------|
| 1     | 17.145    | 4750826 | 190721 | 50.417  | 56.199  |
| 2     | 19.244    | 4672206 | 148645 | 49.583  | 43.801  |
| Total |           | 9423032 | 339366 | 100.000 | 100.000 |

(2*S*,7*aR*)-7*a*-(4-Bromobenzyl)-2-ethoxy-7-oxo-2,4,5,6,7,7*a*-hexahydro-1*H*-indene-3-carbaldehyde (**2k**):

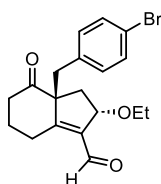

Prepared according to the general procedure as described above in 81% yield (91mg; *dr* = >20:1). It was purified by flash chromatography (30% EtOAc/hexane; *R<sub>f</sub>* = 0.4) to afford colourless liquid; <sup>1</sup>H NMR (400 MHz, CDCl<sub>3</sub>) δ 9.81 (s, 1H), 7.39 (d, *J* = 8.4 Hz, 2H), 6.88 (d, *J* = 8.4 Hz, 2H), 3.91 (td, *J* = 7.0, 2.8 Hz, 1H), 3.54 (dt, *J* = 6.3, 3.7 Hz, 1H), 3.43 (dddd, *J* = 16.1, 9.1, 7.0, 2.1 Hz, 2H), 2.99 (d, *J* = 13.4 Hz, 1H), 2.84 (d, *J* = 13.4 Hz, 1H), 2.76 (ddd, *J* = 15.5, 13.1, 6.0 Hz, 1H), 2.62 (ddd, *J* = 12.2, 5.3, 2.8 Hz, 1H), 2.54 (dt, *J* = 8.8, 4.0 Hz, 1H), 2.28 (dd, *J* = 14.1, 7.2 Hz, 1H), 2.26 – 2.21 (m, 1H), 2.16 (dd, *J* = 14.2, 6.1 Hz, 1H), 1.82 (dddd, *J* = 22.0, 13.2, 9.0, 4.5 Hz, 1H), 1.11 (t, *J* = 7.0 Hz, 3H); <sup>13</sup>C NMR (101 MHz, CDCl<sub>3</sub>) δ 209.5, 187.8, 168.2, 137.2, 135.4, 131.7, 131.3, 121.5, 78.7, 68.5, 65.6, 44.3, 38.9, 34.6, 24.4, 23.7, 15.7; HRMS (ESI) calcd for C<sub>19</sub>H<sub>22</sub>O<sub>3</sub>Br [M+H]<sup>+</sup>: 377.0746; found: 377.0750; [α]<sub>D</sub><sup>20</sup> = -26.19° (*c* 1.0, CHCl<sub>3</sub>); 98:2*er*, Chiral HPLC analysis of the product: Daicel Chiralpak AD-H 250X4.6 mm 5μ column; hexane/2-propanol = 90:10, detected at 254 nm, Flow rate = 1 mL/min, Retention times: 10.86 min (major), 12.02 min (minor).

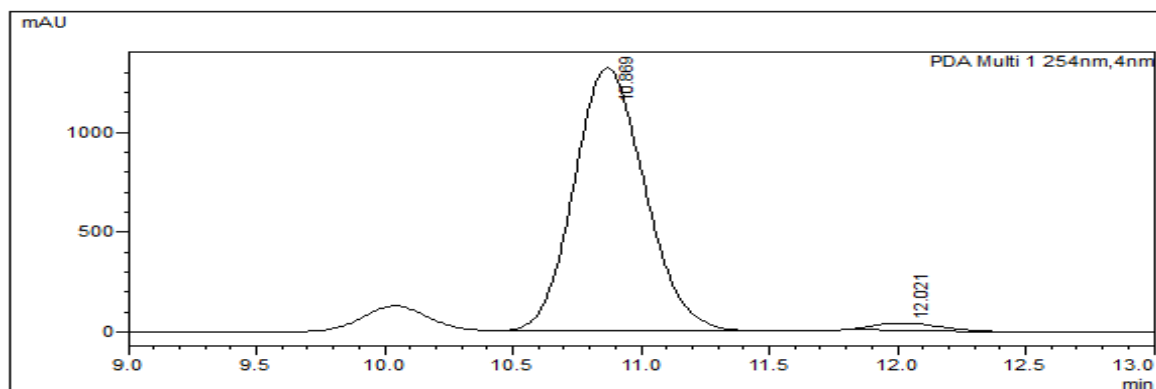

<Peak Table>

| PDA Ch1 254nm |           |          |         |         |         |
|---------------|-----------|----------|---------|---------|---------|
| Peak#         | Ret. Time | Area     | Height  | Area%   | Height% |
| 1             | 10.869    | 25211989 | 1317765 | 97.532  | 97.295  |
| 2             | 12.021    | 638009   | 36630   | 2.468   | 2.705   |
| Total         |           | 25849998 | 1354395 | 100.000 | 100.000 |

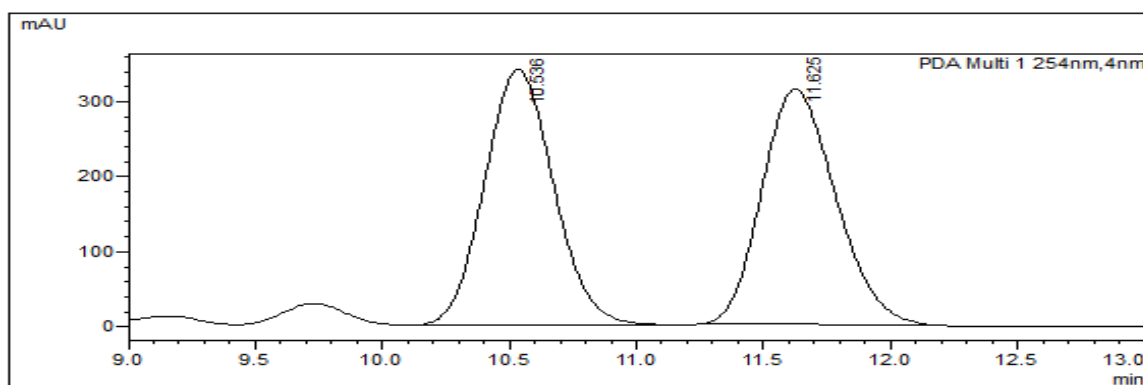

<Peak Table>

| PDA Ch1 254nm |           |          |        |         |         |
|---------------|-----------|----------|--------|---------|---------|
| Peak#         | Ret. Time | Area     | Height | Area%   | Height% |
| 1             | 10.536    | 6424947  | 340644 | 50.268  | 52.110  |
| 2             | 11.625    | 6356404  | 313062 | 49.732  | 47.890  |
| Total         |           | 12781350 | 653706 | 100.000 | 100.000 |

(2*S*,7*aR*)-7a-([1,1'-Biphenyl]-4-ylmethyl)-2-ethoxy-7-oxo-2,4,5,6,7,7*a*-hexahydro-1*H*-indene-3-carbaldehyde (2l):

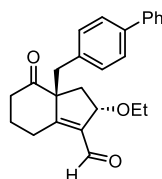

Prepared according to the general procedure as described above in 70% yield (78 mg;  $dr = >20:1$ ). It was purified by flash chromatography (50% EtOAc/hexane;  $R_f = 0.3$ ) to afford colourless liquid;  $^1\text{H}$  NMR (400 MHz,  $\text{CDCl}_3$ )  $\delta$  9.83 (s, 1H), 7.57 (dd,  $J = 8.3, 1.2$  Hz, 2H), 7.50 (d,  $J = 8.2$  Hz, 2H), 7.43 (t,  $J = 7.5$  Hz, 2H), 7.37 – 7.32 (m, 1H), 7.08 (d,  $J = 8.2$  Hz, 2H), 3.93 (td,  $J = 7.0, 2.8$  Hz, 1H), 3.55 (dt,  $J = 14.9, 2.9$  Hz, 1H), 3.50 – 3.35 (m, 2H), 3.09 (d,  $J = 13.3$  Hz, 1H), 2.93 (d,  $J = 13.3$  Hz, 1H), 2.81 (ddd,  $J = 15.4, 13.2, 6.0$  Hz, 1H), 2.67 (dddd,  $J = 15.4, 12.3, 5.2, 2.7$  Hz, 1H), 2.56 (dt,  $J = 15.4, 3.2$  Hz, 1H), 2.39 (dd,  $J = 14.0, 7.2$  Hz, 1H), 2.33 – 2.23 (m, 1H), 2.18 (dd,  $J = 14.1, 6.1$  Hz, 1H), 1.84 (dddd,  $J = 22.0, 13.2, 8.9, 4.5$  Hz, 1H), 1.09 (t,  $J = 7.0$  Hz, 3H);  $^{13}\text{C}$  NMR (101 MHz,  $\text{CDCl}_3$ )  $\delta$  210.1, 188.7, 162.8, 140.5, 140.4, 137.9, 134.3, 130.5, 129.0, 127.6, 127.1, 127.1, 79.8, 67.5, 65.2, 43.2, 38.4, 36.8, 24.1, 23.6, 15.6; HRMS (ESI) calcd for  $\text{C}_{25}\text{H}_{27}\text{O}_3\text{N}$   $[\text{M}+\text{H}]^+$ : 375.1954; found: 375.1947;  $[\alpha]^{20}_{\text{D}} = -6.99^\circ$  (c 1.0,  $\text{CHCl}_3$ ); 91:9 $er$ ; Chiral HPLC analysis of the product: Daicel Chiralpak AD-H 250X4.6 mm  $5\mu$  column; hexane/2-propanol = 90:10, detected at 290 nm, Flow rate = 1 mL/min, Retention times: 11.40 min (minor), 12.80 min (major).

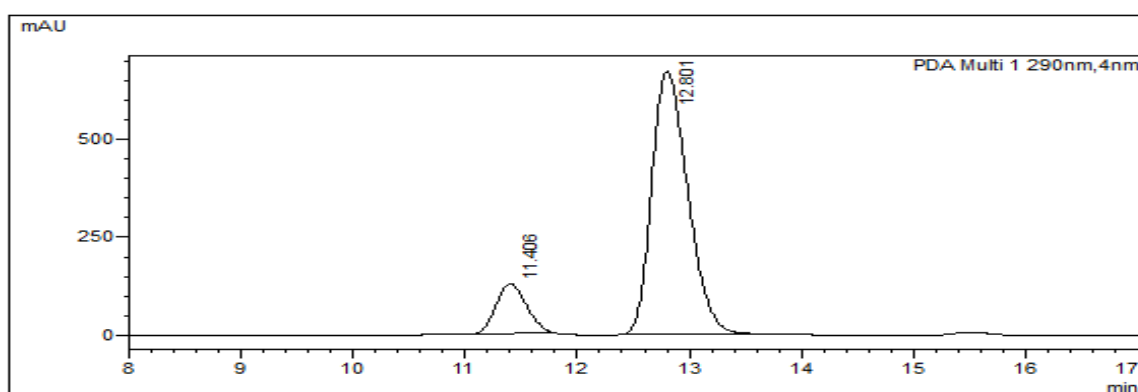

| <Peak Table>  |           |          |        |         |         |
|---------------|-----------|----------|--------|---------|---------|
| PDA Ch1 290nm |           |          |        |         |         |
| Peak#         | Ret. Time | Area     | Height | Area%   | Height% |
| 1             | 11.406    | 1521547  | 98478  | 9.269   | 12.798  |
| 2             | 12.801    | 14894219 | 671023 | 90.731  | 87.202  |
| Total         |           | 16415766 | 769501 | 100.000 | 100.000 |

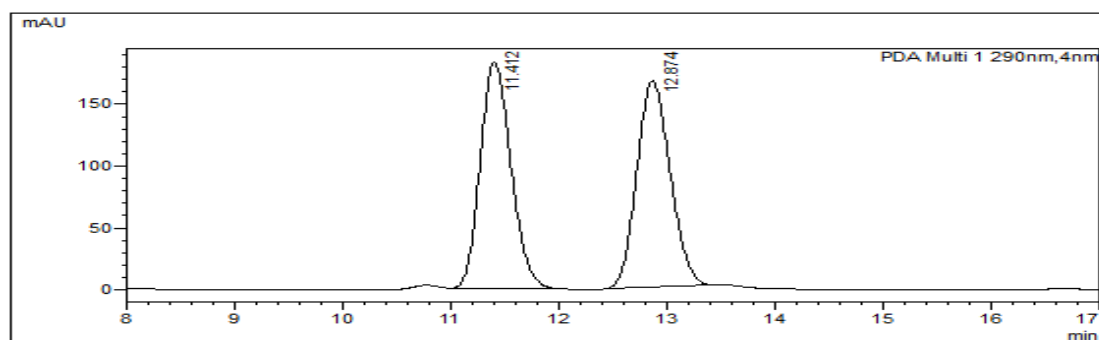

<Peak Table>

| Peak# | Ret. Time | Area    | Height | Area%   | Height% |
|-------|-----------|---------|--------|---------|---------|
| 1     | 11.412    | 3611368 | 182784 | 50.179  | 52.283  |
| 2     | 12.874    | 3585663 | 166822 | 49.821  | 47.717  |
| Total |           | 7197030 | 349606 | 100.000 | 100.000 |

**(2*S*,7*aR*)-2-Methoxy-7*a*-(4-nitrobenzyl)-7-oxo-2,4,5,6,7,7*a*-hexahydro-1*H*-indene-3-carbaldehyde (2*m*):**

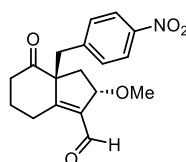

Prepared according to the general procedure as described above in 66% yield (67 mg; *dr* = 7:1). It was purified by flash chromatography (50% EtOAc/hexane; *R<sub>f</sub>* = 0.3) to afford red liquid; <sup>1</sup>H NMR (500 MHz, CDCl<sub>3</sub>) δ 9.82 (s, 1H), 8.14 (d, *J* = 8.7 Hz, 2H), 7.19 (d, *J* = 8.7 Hz, 2H), 3.96 (td, *J* = 6.9, 2.8 Hz, 1H), 3.58 (dt, *J* = 14.8, 3.1 Hz, 1H), 3.49 – 3.37 (m, 2H), 3.10 (d, *J* = 13.4 Hz, 1H), 3.04 (d, *J* = 13.4 Hz, 1H), 2.78 (ddd, *J* = 15.5, 13.1, 6.0 Hz, 1H), 2.66 – 2.56 (m, 2H), 2.33 – 2.21 (m, 1H), 2.24 (ddd, *J* = 20.3, 14.3, 6.6 Hz, 2H), 1.85 (ddt, *J* = 26.5, 13.1, 4.5 Hz, 1H), 1.10 (t, *J* = 7.0 Hz, 3H); <sup>13</sup>C NMR (126 MHz, CDCl<sub>3</sub>) δ 209.1, 188.6, 161.6, 147.4, 142.5, 138.0, 130.9, 123.7, 79.7, 67.0, 65.4, 42.9, 38.3, 36.5, 24.0, 23.5, 15.6; HRMS (ESI) calcd for C<sub>19</sub>H<sub>20</sub>O<sub>5</sub>N [M-H]<sup>+</sup>: 342.1336; found: 342.1339; [α]<sub>D</sub><sup>20</sup> = -73.30° (*c* 1.0, CHCl<sub>3</sub>); 89:11*er*; Chiral HPLC analysis of the product: Daicel Chiralpak IC 250X4.6 mm 5μ column; hexane/2-propanol = 80:20, detected at 254 nm, Flow rate = 1 mL/min, Retention times: 12.39 min (major), 18.48 min (minor).

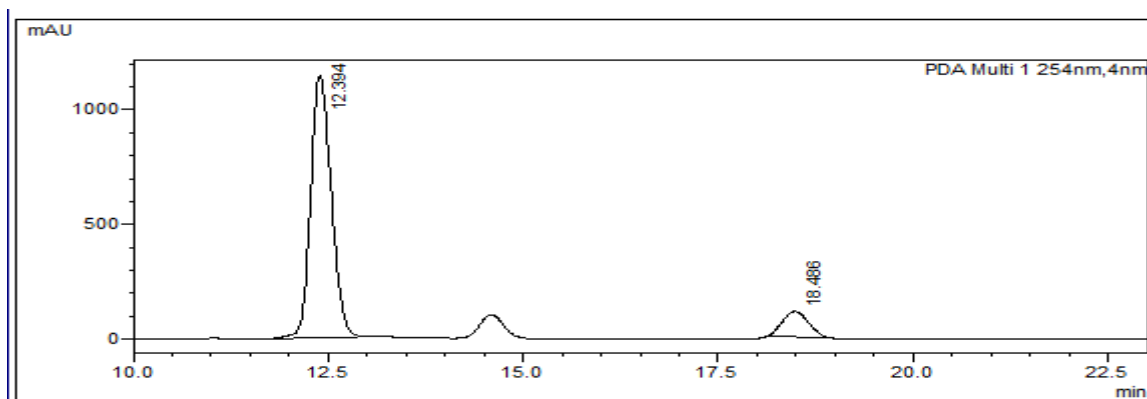

<Peak Table>

| Peak# | Ret. Time | Area     | Height  | Area%   | Height% |
|-------|-----------|----------|---------|---------|---------|
| 1     | 12.394    | 21095539 | 1145248 | 89.199  | 91.226  |
| 2     | 18.486    | 2554360  | 110150  | 10.801  | 8.774   |
| Total |           | 23649899 | 1255398 | 100.000 | 100.000 |

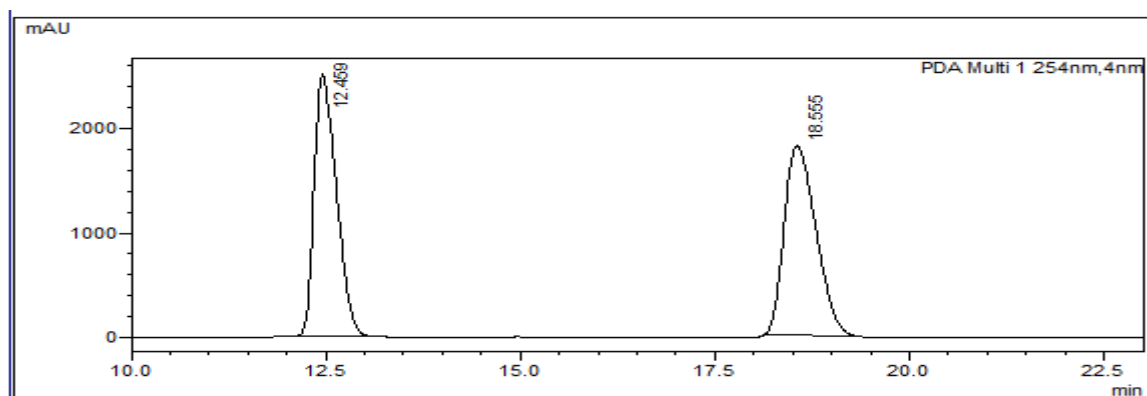

<Peak Table>

| Peak# | Ret. Time | Area      | Height  | Area%   | Height% |
|-------|-----------|-----------|---------|---------|---------|
| 1     | 12.459    | 50073819  | 2513895 | 49.205  | 58.074  |
| 2     | 18.555    | 51692391  | 1814904 | 50.795  | 41.926  |
| Total |           | 101766210 | 4328799 | 100.000 | 100.000 |

(2*S*,7*aR*)-2-Ethoxy-7*a*-(3-methoxybenzyl)-7-oxo-2,4,5,6,7,7*a*-hexahydro-1*H*-indene-3-carbaldehyde (2n):

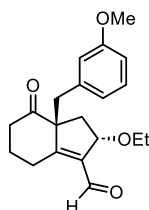

Prepared according to the general procedure as described above in 78% yield (76 mg; *dr* = >20:1). It was purified by flash chromatography (40% EtOAc/hexane; *R<sub>f</sub>* = 0.4) to afford colourless liquid; <sup>1</sup>H NMR (400 MHz, CDCl<sub>3</sub>) δ 9.82 (s, 1H), 7.17 (t, *J* = 7.9 Hz, 1H), 6.79 (dd, *J* = 8.2, 2.2 Hz, 1H), 6.59 (d, *J* = 7.6 Hz, 1H), 6.54 (d, *J* = 1.9 Hz, 1H), 3.92 (td, *J* = 6.8, 2.8 Hz, 1H), 3.75 (s, 3H), 3.52 (dt, *J* =

14.7, 3.7 Hz, 1H), 3.47 – 3.38 (m, 2H), 3.03 (d,  $J = 13.3$  Hz, 1H), 2.84 (d,  $J = 13.3$  Hz, 1H), 2.78 (ddd,  $J = 15.5, 13.2, 6.1$  Hz, 1H), 2.68 – 2.58 (m, 1H), 2.54 (dt,  $J = 15.5, 3.2$  Hz, 1H), 2.36 (dd,  $J = 14.0, 7.2$  Hz, 1H), 2.30 – 2.21 (m, 1H), 2.15 (dd,  $J = 14.2, 6.1$  Hz, 1H), 1.82 (tdd,  $J = 17.6, 8.9, 4.4$  Hz, 1H), 1.10 (t,  $J = 7.0$  Hz, 3H);  $^{13}\text{C}$  NMR (101 MHz,  $\text{CDCl}_3$ )  $\delta$  210.1, 188.7, 162.9, 159.5, 138.0, 136.7, 129.5, 122.5, 116.2, 112.6, 79.8, 67.4, 65.2, 55.4, 43.5, 38.4, 36.8, 24.0, 23.5, 15.6; HRMS (ESI) calcd for  $\text{C}_{20}\text{H}_{24}\text{O}_4\text{Na}$   $[\text{M}+\text{Na}]^+$ : 351.1566 found: 351.1555;  $[\alpha]_D^{20} = -25.50^\circ$  ( $c$  1.0,  $\text{CHCl}_3$ ); >99:1 *er*; Chiral HPLC analysis of the product: Daicel Chiralpak IC 250X 4.6 mm  $5\mu$  column; hexane/2-propanol = 80:20, detected at 254 nm, Flow rate = 1 mL/min, Retention times: 15.31 min (major), 17.98 min (minor).

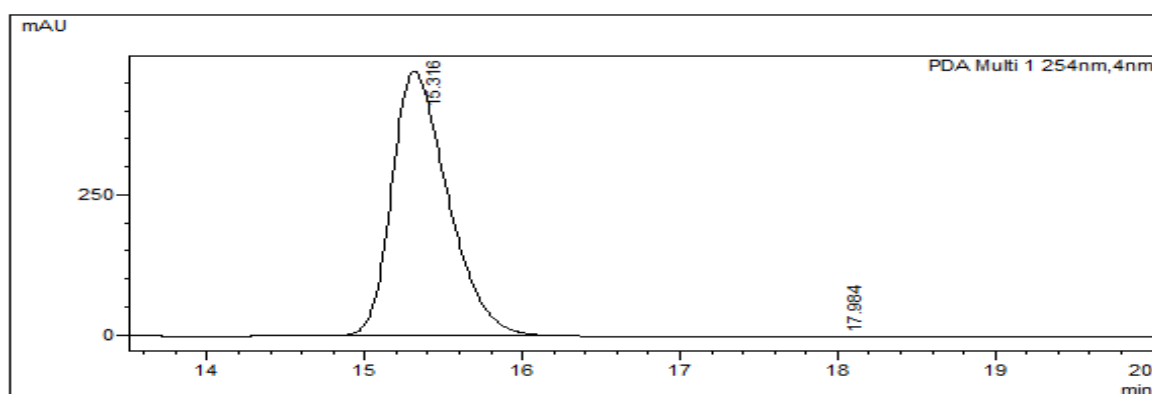

<Peak Table>

| PDA Ch1 254nm |           |          |        |         |         |
|---------------|-----------|----------|--------|---------|---------|
| Peak#         | Ret. Time | Area     | Height | Area%   | Height% |
| 1             | 15.316    | 11668212 | 471236 | 99.680  | 99.840  |
| 2             | 17.984    | 37460    | 755    | 0.320   | 0.160   |
| Total         |           | 11705672 | 471991 | 100.000 | 100.000 |

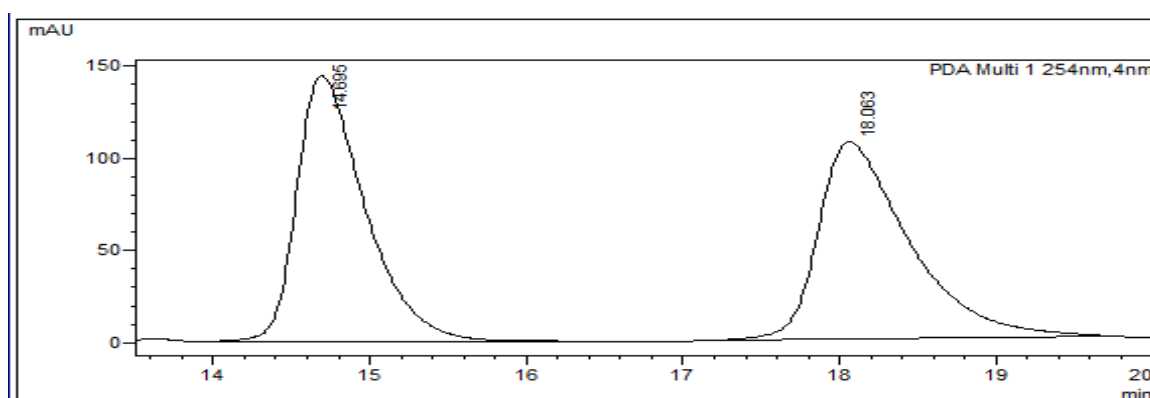

<Peak Table>

| PDA Ch1 254nm |           |         |        |         |         |
|---------------|-----------|---------|--------|---------|---------|
| Peak#         | Ret. Time | Area    | Height | Area%   | Height% |
| 1             | 14.695    | 4420731 | 144588 | 50.285  | 57.466  |
| 2             | 18.063    | 4370622 | 107017 | 49.715  | 42.534  |
| Total         |           | 8791353 | 251605 | 100.000 | 100.000 |

**(2*S*,7*aR*)-2-Ethoxy-7*a*-(3-fluorobenzyl)-7-oxo-2,4,5,6,7,7*a*-hexahydro-1*H*-indene-3-carbaldehyde (2o):**

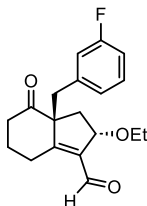

Prepared according to the general procedure as described above in 70% yield (66 mg; *dr* = >20:1). It was purified by flash chromatography (30% EtOAc/hexane; *R<sub>f</sub>* = 0.4) to afford red liquid; <sup>1</sup>H NMR (500 MHz, CDCl<sub>3</sub>) δ 9.83 (s, 1H), 7.23 (td, *J* = 8.0, 6.0 Hz, 1H), 6.96 (tdd, *J* = 8.5, 2.5, 0.6 Hz, 1H), 6.78 (d, *J* = 7.7 Hz, 1H), 6.73 (dt, *J* = 9.6, 1.9 Hz, 1H), 3.92 (td, *J* = 7.0, 2.8 Hz, 1H), 3.53 (dt, *J* = 14.8, 3.1 Hz, 1H), 3.49 – 3.38 (m, 2H), 3.03 (d, *J* = 13.4 Hz, 1H), 2.88 (d, *J* = 13.4 Hz, 1H), 2.77 (ddd, *J* = 15.5, 13.2, 6.0 Hz, 1H), 2.66 – 2.58 (m, 1H), 2.55 (dt, *J* = 15.6, 4.2 Hz, 1H), 2.32 (dd, *J* = 14.2, 7.2 Hz, 1H), 2.26 (dddd, *J* = 11.8, 8.9, 5.9, 3.1 Hz, 1H), 2.17 (dd, *J* = 14.2, 6.1 Hz, 1H), 1.83 (ddt, *J* = 26.3, 13.2, 4.4 Hz, 1H), 1.10 (t, *J* = 7.0 Hz, 3H); <sup>13</sup>C NMR (101 MHz, CDCl<sub>3</sub>) δ 209.7, 188.6, 162.6 (d, *J<sub>CF</sub>* = 248.08 Hz), 162.4, 138.0, 137.7 (d, *J<sub>CF</sub>* = 7.38 Hz), 129.96 (d, *J<sub>CF</sub>* = 8.2 Hz), 125.75 (d, *J<sub>CF</sub>* = 2.2 Hz), 117.0 (d, *J<sub>CF</sub>* = 21.18 Hz), 114.59 (d, *J<sub>CF</sub>* = 29.21 Hz), 79.7, 67.2, 65.3, 43.0, 38.3, 36.6, 24.0, 23.5, 15.6; <sup>19</sup>F NMR (376 MHz, CDCl<sub>3</sub>) δ -112.7; HRMS (ESI) calcd for C<sub>19</sub>H<sub>22</sub>O<sub>3</sub>F [M+H]<sup>+</sup>: 317.1547; found: 317.1542; [α]<sub>D</sub><sup>20</sup> = +47.80° (c 1.0, CHCl<sub>3</sub>); 91:9*er*; Chiral HPLC analysis of the product: Daicel Chiralpak IC 250X4.6 mm 5μ column; hexane/2-propanol = 90:10, detected at 290 nm, Flow rate = 1 mL/min, Retention times: 16.72 min (major), 18.38 min (minor).

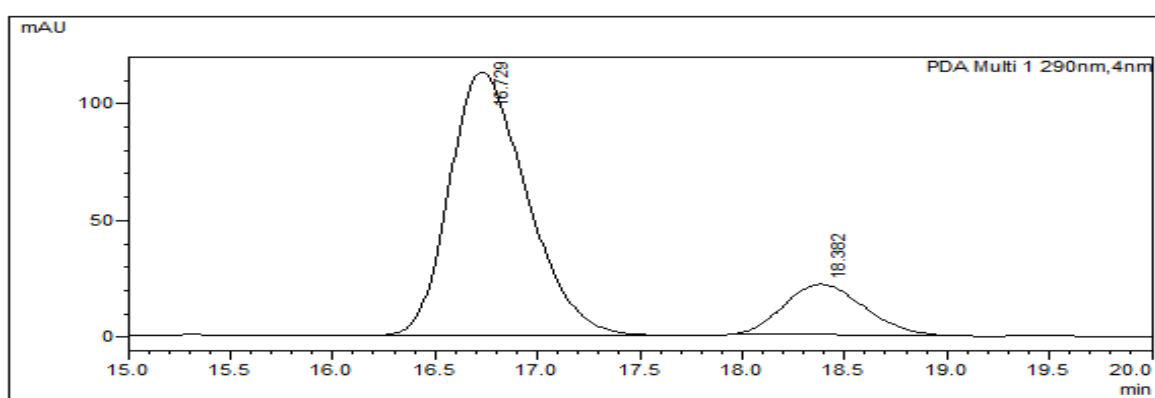

**Peak Table**

| PDA Ch1 290nm |           |         |        |         |         |
|---------------|-----------|---------|--------|---------|---------|
| Peak#         | Ret. Time | Area    | Height | Area%   | Height% |
| 1             | 16.729    | 2966201 | 112569 | 91.036  | 88.596  |
| 2             | 18.382    | 292058  | 14490  | 8.964   | 11.404  |
| Total         |           | 3258259 | 127059 | 100.000 | 100.000 |

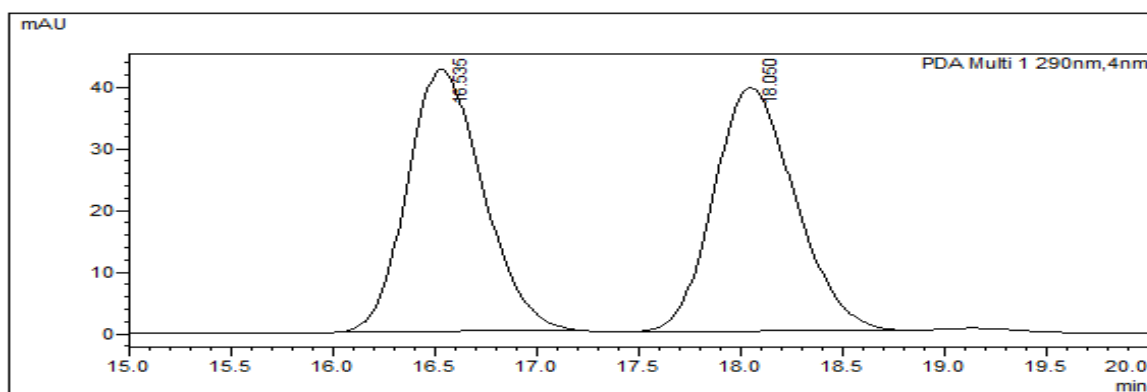

<Peak Table>

| PDA Ch1 290nm |           |         |        |         |         |
|---------------|-----------|---------|--------|---------|---------|
| Peak#         | Ret. Time | Area    | Height | Area%   | Height% |
| 1             | 16.535    | 1103006 | 42544  | 50.158  | 51.923  |
| 2             | 18.050    | 1096036 | 39392  | 49.842  | 48.077  |
| Total         |           | 2199041 | 81936  | 100.000 | 100.000 |

(2*S*,7*aR*)-7*a*-(3-Chlorobenzyl)-2-ethoxy-7-oxo-2,4,5,6,7,7*a*-hexahydro-1*H*-indene-3-carbaldehyde (2*p*):

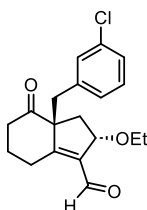

Prepared according to the general procedure as described above in 71% yield (70 mg; *dr* = >20:1). It was purified by flash chromatography (30% EtOAc/hexane; *R<sub>f</sub>* = 0.4) to afford colourless liquid; <sup>1</sup>H NMR (400 MHz, CDCl<sub>3</sub>) δ 9.82 (s, 1H), 7.23 (t, *J* = 1.5 Hz, 1H), 7.19 (t, *J* = 7.7 Hz, 1H), 7.01 (t, *J* = 1.7 Hz, 1H), 6.88 (d, *J* = 7.5 Hz, 1H), 3.92 (td, *J* = 7.0, 2.8 Hz, 1H), 3.53 (dt, *J* = 14.8, 3.2 Hz, 1H), 3.48 – 3.39 (m, 2H), 3.00 (d, *J* = 13.4 Hz, 1H), 2.86 (d, *J* = 13.4 Hz, 1H), 2.76 (ddd, *J* = 15.5, 13.1, 6.0 Hz, 1H), 2.66 – 2.58 (m, 1H), 2.55 (dt, *J* = 6.6, 4.0 Hz, 1H), 2.30 (dd, *J* = 14.2, 7.2 Hz, 1H), 2.26 – 2.21 (m, 1H), 2.17 (dd, *J* = 14.2, 6.1 Hz, 1H), 1.86 (ddt, *J* = 26.2, 13.0, 4.5 Hz, 1H), 1.10 (t, *J* = 7.0 Hz, 3H); <sup>13</sup>C NMR (101 MHz, CDCl<sub>3</sub>) δ 209.7, 188.5, 162.4, 138.0, 137.3, 134.3, 130.1, 129.7, 128.1, 127.8, 79.7, 67.2, 65.3, 42.9, 38.3, 36.6, 24.0, 23.5, 15.5; HRMS (ESI) calcd for C<sub>19</sub>H<sub>22</sub>O<sub>3</sub>Cl [M+H]<sup>+</sup>: 333.1252; found: 333.1243; [α]<sub>D</sub><sup>20</sup> = -26.60° (*c* 1.0, CHCl<sub>3</sub>); 93:7*er*; Chiral HPLC analysis of the product: Daicel Chiralpak IC 250X4.6 mm 5μ column; hexane/2-propanol = 80:20, detected at 254 nm, Flow rate = 1 mL/min, Retention times: 23.62 min (major), 30.21 min (minor).

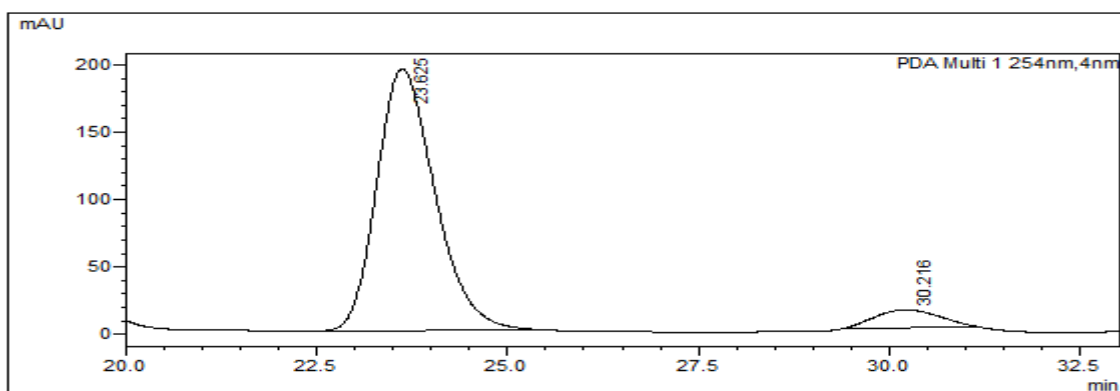

<Peak Table>

| PDA Ch1 254nm |           |          |        |         |         |
|---------------|-----------|----------|--------|---------|---------|
| Peak#         | Ret. Time | Area     | Height | Area%   | Height% |
| 1             | 23.625    | 10258262 | 193997 | 92.643  | 93.439  |
| 2             | 30.216    | 814646   | 13621  | 7.357   | 6.561   |
| Total         |           | 11072908 | 207618 | 100.000 | 100.000 |

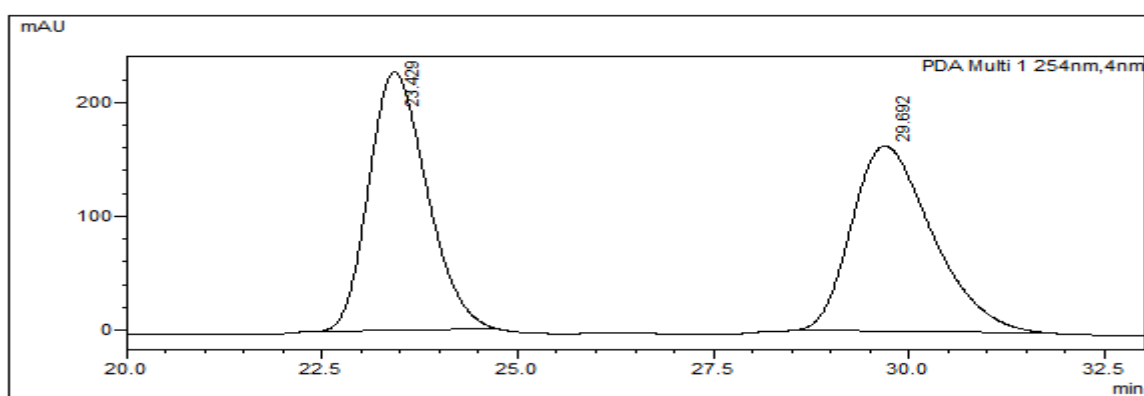

<Peak Table>

| PDA Ch1 254nm |           |          |        |         |         |
|---------------|-----------|----------|--------|---------|---------|
| Peak#         | Ret. Time | Area     | Height | Area%   | Height% |
| 1             | 23.429    | 11689697 | 227057 | 50.134  | 58.289  |
| 2             | 29.692    | 11627119 | 162477 | 49.866  | 41.711  |
| Total         |           | 23316816 | 389534 | 100.000 | 100.000 |

(2*S*,7*aR*)-7*a*-(3-Bromobenzyl)-2-ethoxy-7-oxo-2,4,5,6,7,7*a*-hexahydro-1*H*-indene-3-carbaldehyde (2q):

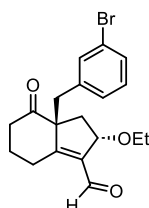

Prepared according to the general procedure as described above in 75% yield (84 mg; *dr* = >20:1). It was purified by flash chromatography (40% EtOAc/hexane; *R<sub>f</sub>* = 0.5) to afford colourless liquid; <sup>1</sup>H NMR (500 MHz, CDCl<sub>3</sub>) δ 9.83 (s, 1H), 7.40 (ddd, *J* = 8.0, 1.8, 0.9 Hz, 1H), 7.17 (t, *J* = 1.7 Hz, 1H),

7.13 (t,  $J = 7.8$  Hz, 1H), 6.92 (d,  $J = 7.7$  Hz, 1H), 3.89 (td,  $J = 7.0, 2.9$  Hz, 1H), 3.53 (dt,  $J = 14.8, 3.1$  Hz, 1H), 3.49 – 3.38 (m, 2H), 2.99 (d,  $J = 13.4$  Hz, 1H), 2.85 (d,  $J = 13.4$  Hz, 1H), 2.76 (ddd,  $J = 15.5, 13.1, 6.0$  Hz, 1H), 2.64 – 2.59 (m, 1H), 2.55 (dt,  $J = 8.6, 3.7$  Hz, 1H), 2.29 (dd,  $J = 14.2, 7.2$  Hz, 1H), 2.27 – 2.22 (m, 1H), 2.17 (dd,  $J = 14.2, 6.1$  Hz, 1H), 1.88 – 1.77 (m, 1H), 1.10 (t,  $J = 7.0$  Hz, 3H);  $^{13}\text{C}$  NMR (101 MHz,  $\text{CDCl}_3$ )  $\delta$  209.7, 188.5, 162.3, 138.1, 137.5, 133.1, 130.7, 130.0, 128.6, 122.5, 79.7, 67.2, 65.2, 42.8, 38.3, 36.6, 24.0, 23.5, 15.5; HRMS (ESI) calcd for  $\text{C}_{19}\text{H}_{22}\text{O}_3\text{NBr}$   $[\text{M}+\text{H}]^+$ : 377.0746; found: 377.0751;  $[\alpha]_{\text{D}}^{20} = -24.00^\circ$  ( $c$  1.0,  $\text{CHCl}_3$ ); >99:1er; Chiral HPLC analysis of the product: Daicel Chiralpak AD-H 250X4.6 mm  $5\mu$  column; hexane/2-propanol = 90:10, detected at 254 nm, Flow rate = 1 mL/min, Retention times: 13.42 min (major), 14.54 min (minor).

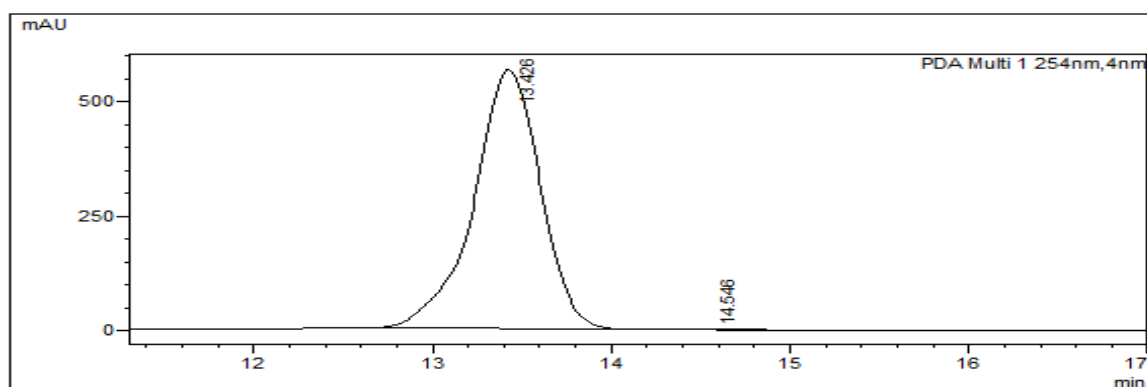

<Peak Table>

| PDA Ch1 254nm |           |          |        |         |         |
|---------------|-----------|----------|--------|---------|---------|
| Peak#         | Ret. Time | Area     | Height | Area%   | Height% |
| 1             | 13.426    | 14680946 | 566644 | 99.540  | 99.552  |
| 2             | 14.546    | 67879    | 2551   | 0.460   | 0.448   |
| Total         |           | 14748825 | 569195 | 100.000 | 100.000 |

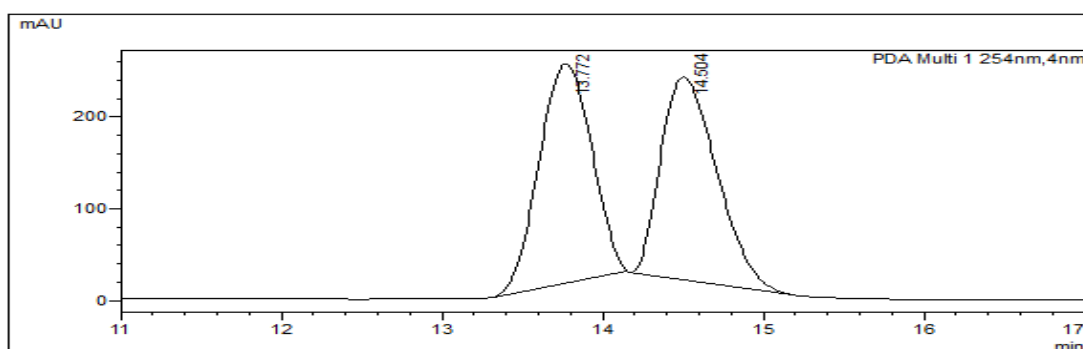

<Peak Table>

| PDA Ch1 254nm |           |          |        |         |         |
|---------------|-----------|----------|--------|---------|---------|
| Peak#         | Ret. Time | Area     | Height | Area%   | Height% |
| 1             | 13.772    | 5452842  | 238604 | 50.410  | 51.926  |
| 2             | 14.504    | 5364092  | 220900 | 49.590  | 48.074  |
| Total         |           | 10816934 | 459504 | 100.000 | 100.000 |

**(2*S*,7*aR*)-2-Ethoxy-7*a*-(3-nitrobenzyl)-7-oxo-2,4,5,6,7,7*a*-hexahydro-1*H*-indene-3-carbaldehyde (2*r*):**

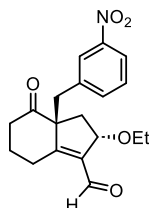

Prepared according to the general procedure as described above in 62% yield (63 mg; *dr* = >20:1). It was purified by flash chromatography (50% EtOAc/hexane; *R<sub>f</sub>* = 0.3) to afford yellow liquid; <sup>1</sup>H NMR (400 MHz, CDCl<sub>3</sub>) δ 9.84 (s, 1H), 8.14 (ddd, *J* = 8.2, 2.2, 0.9 Hz, 1H), 7.91 (t, *J* = 1.9 Hz, 1H), 7.47 (t, *J* = 7.9 Hz, 1H), 7.34 (d, *J* = 7.8 Hz, 1H), 3.94 (td, *J* = 6.7, 2.8 Hz, 1H), 3.57 (dt, *J* = 14.9, 3.2 Hz, 1H), 3.43 (qq, *J* = 9.1, 7.0 Hz, 2H), 3.08 (q, *J* = 13.6 Hz, 2H), 2.80 (ddd, *J* = 15.6, 13.1, 6.0 Hz, 1H), 2.71 – 2.63 (m, 1H), 2.60 (dt, *J* = 15.8, 3.1 Hz, 1H), 2.36 – 2.28 (m, 1H), 2.25 (qd, *J* = 14.4, 6.6 Hz, 2H), 1.86 (ddt, *J* = 26.3, 13.2, 4.5 Hz, 1H), 1.10 (t, *J* = 7.0 Hz, 3H); <sup>13</sup>C NMR (101 MHz, CDCl<sub>3</sub>) δ 209.1, 188.3, 162.0, 148.2, 138.2, 137.3, 135.9, 129.5, 124.8, 122.7, 79.6, 67.1, 65.4, 42.7, 38.3, 36.3, 24.1, 23.4, 15.5; HRMS (ESI) calcd for C<sub>19</sub>H<sub>22</sub>O<sub>5</sub>N [M+H]<sup>+</sup>: 344.1492; found: 344.1496; [α]<sub>D</sub><sup>20</sup> = -3.20° (*c* 1.0, CHCl<sub>3</sub>); 86:14*er*; Chiral HPLC analysis of the product: Daicel Chiralpak AD-H 250X4.6 mm 5μ column; hexane/2-propanol = 90:10, detected at 254 nm, Flow rate = 1 mL/min, Retention times: 34.59 min (minor), 37.23 min (major).

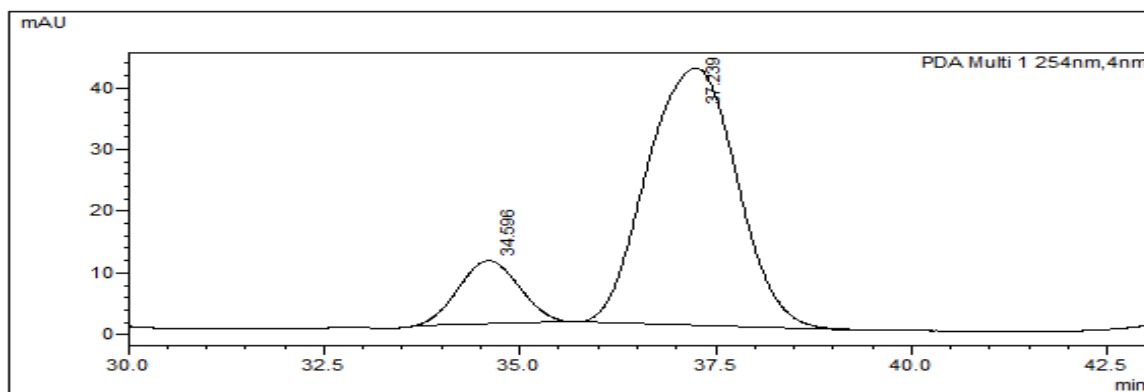

<Peak Table>

| PDA Ch1 254nm |           |         |        |         |         |
|---------------|-----------|---------|--------|---------|---------|
| Peak#         | Ret. Time | Area    | Height | Area%   | Height% |
| 1             | 34.596    | 554398  | 10253  | 14.271  | 19.721  |
| 2             | 37.239    | 3330323 | 41736  | 85.729  | 80.279  |
| Total         |           | 3884721 | 51988  | 100.000 | 100.000 |

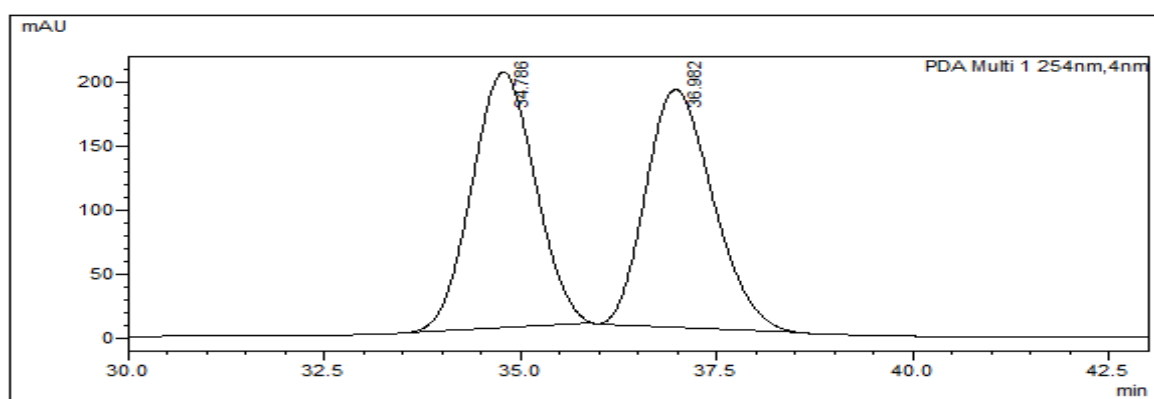

<Peak Table>

| PDA Ch1 254nm |           |          |        |         |         |
|---------------|-----------|----------|--------|---------|---------|
| Peak#         | Ret. Time | Area     | Height | Area%   | Height% |
| 1             | 34.786    | 11268378 | 199923 | 50.388  | 51.800  |
| 2             | 36.982    | 11094868 | 186027 | 49.612  | 48.200  |
| Total         |           | 22363247 | 385950 | 100.000 | 100.000 |

(2*S*,7*aR*)-7*a*-(2-Chlorobenzyl)-2-ethoxy-7-oxo-2,4,5,6,7,7*a*-hexahydro-1*H*-indene-3-carbaldehyde (2*s*):

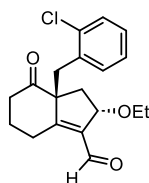

Prepared according to the general procedure as described above in 82% yield (81 mg; *dr* = >20:1). It was purified by flash chromatography (30% EtOAc/hexane; *R<sub>f</sub>* = 0.5) to afford colourless liquid; <sup>1</sup>H NMR (400 MHz, CDCl<sub>3</sub>) δ 9.86 (s, 1H), 7.36 (dd, *J* = 7.7, 1.6 Hz, 1H), 7.18 (dtd, *J* = 16.8, 7.4, 1.6 Hz, 2H), 6.98 (dd, *J* = 7.4, 1.8 Hz, 1H), 4.09 (td, *J* = 6.8, 2.9 Hz, 1H), 3.53 – 3.42 (m, 3H), 3.22 (d, *J* = 13.7 Hz, 1H), 3.09 (d, *J* = 13.8 Hz, 1H), 2.79 (ddd, *J* = 15.4, 13.1, 5.9 Hz, 1H), 2.66 (dddd, *J* = 15.3, 12.6, 5.3, 3.0 Hz, 1H), 2.55 (dt, *J* = 15.4, 3.3 Hz, 1H), 2.42 (dd, *J* = 14.1, 7.0 Hz, 1H), 2.29 – 2.19 (m, 1H), 2.06 (dd, *J* = 14.1, 6.5 Hz, 1H), 1.87 – 1.73 (m, 1H), 1.10 (t, *J* = 7.0 Hz, 3H); <sup>13</sup>C NMR (101 MHz, CDCl<sub>3</sub>) δ 209.9, 188.7, 163.4, 137.8, 135.0, 133.6, 131.9, 130.1, 129.0, 126.8, 80.0, 66.8, 65.2, 39.7, 38.6, 36.5, 24.0, 23.8, 15.6; HRMS (ESI) calcd for C<sub>19</sub>H<sub>22</sub>O<sub>3</sub>Cl [M+H]<sup>+</sup>: 333.1252; found: 333.1266; [α]<sub>D</sub><sup>20</sup> = -68.92° (*c* 1.0, CHCl<sub>3</sub>); 91:9*er*; Chiral HPLC analysis of the product: Daicel Chiralpak AD-H 250X4.6 mm 5μ column; hexane/2-propanol = 90:10, detected at 254 nm, Flow rate = 1 mL/min, Retention times: 8.21 (minor), 10.50 min (major).

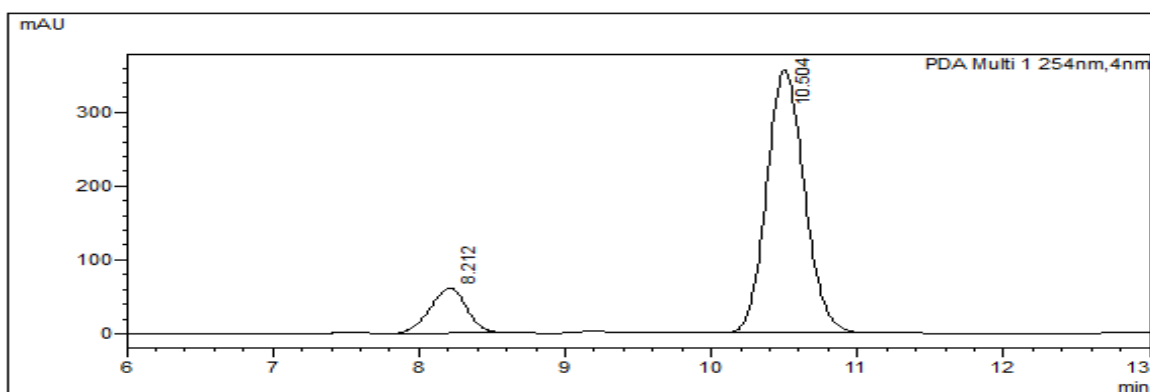

<Peak Table>

| PDA Ch1 254nm |           |         |        |         |         |
|---------------|-----------|---------|--------|---------|---------|
| Peak#         | Ret. Time | Area    | Height | Area%   | Height% |
| 1             | 8.212     | 651781  | 46661  | 9.230   | 11.584  |
| 2             | 10.504    | 6409914 | 356158 | 90.770  | 88.416  |
| Total         |           | 7061695 | 402820 | 100.000 | 100.000 |

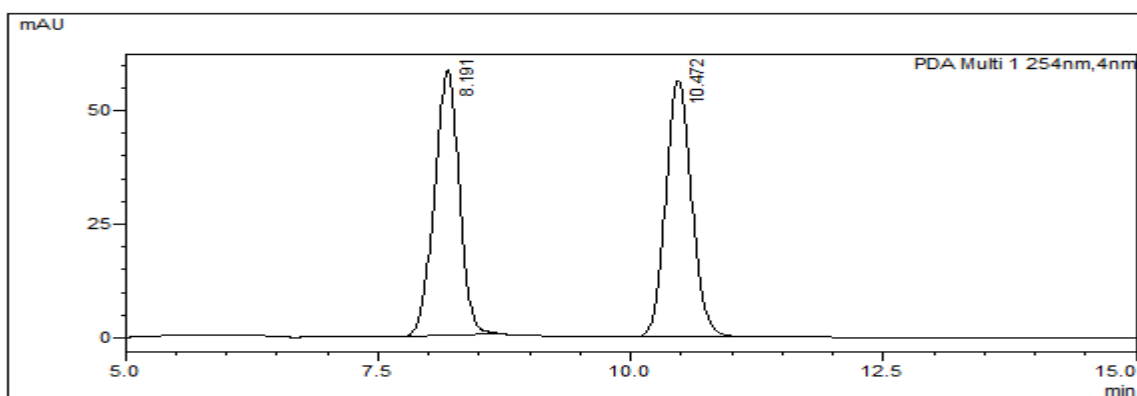

<Peak Table>

| PDA Ch1 254nm |           |         |        |         |         |
|---------------|-----------|---------|--------|---------|---------|
| Peak#         | Ret. Time | Area    | Height | Area%   | Height% |
| 1             | 8.191     | 991847  | 58271  | 49.785  | 50.863  |
| 2             | 10.472    | 1000396 | 56292  | 50.215  | 49.137  |
| Total         |           | 1992243 | 114563 | 100.000 | 100.000 |

(2*S*,7*aR*)-7*a*-(2-Bromobenzyl)-2-ethoxy-7-oxo-2,4,5,6,7,7*a*-hexahydro-1*H*-indene-3-carbaldehyde (2t):

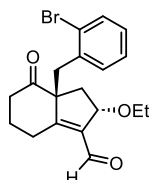

Prepared according to the general procedure as described above in 86% yield (97 mg; *dr* = 11:1). It was purified by flash chromatography (30% EtOAc/hexane; *R<sub>f</sub>* = 0.4) to afford colourless liquid; <sup>1</sup>H NMR (400 MHz, CDCl<sub>3</sub>) δ = 9.88 (s, 1H), 7.56 (d, *J*=8.0, 1H), 7.26 (d, *J*=0.9, 1H), 7.20 (t, *J*=7.5, 1H), 7.12 (t, *J*=7.6, 1H), 6.96 (d, *J*=7.6, 1H), 4.17 (td, *J*=6.6, 2.7, 1H), 3.55 – 3.43 (m, 3H), 3.29 (d, *J*=13.9,

1H), 3.11 (d,  $J=13.9$ , 1H), 2.79 (ddd,  $J=14.9$ , 13.6, 5.9, 1H), 2.71 – 2.60 (m, 1H), 2.60 – 2.52 (m, 1H), 2.43 (dd,  $J=14.1$ , 7.1, 1H), 2.29 – 2.19 (m, 1H), 2.08 (dd,  $J=14.1$ , 6.4, 1H), 1.87 – 1.74 (m, 1H), 1.12 (t,  $J=7.0$ , 3H);  $^{13}\text{C}$  NMR (101 MHz,  $\text{CDCl}_3$ )  $\delta$  209.9, 188.8, 163.3, 137.8, 135.4, 133.5, 131.6, 129.2, 127.4, 126.0, 80.1, 66.9, 65.3, 42.1, 38.7, 36.4, 24.0, 23.8, 15.6; HRMS(ESI) calcd for  $\text{C}_{19}\text{H}_{22}\text{O}_3\text{Br}$   $[\text{M}+\text{H}]^+$ : 377.0746; found: 377.0751;  $[\alpha]^{20}_{\text{D}} = +48.50^\circ$  ( $c$  1.0,  $\text{CHCl}_3$ ); 97:3 $er$ ; Chiral HPLC analysis of the product: Daicel Chiralpak AD-H 250X4.6 mm 5 $\mu$  column; hexane/2-propanol = 90:10, detected at 254 nm, Flow rate = 1 mL/min, Retention time: 8.11 min (major), 10.77 min(minor).

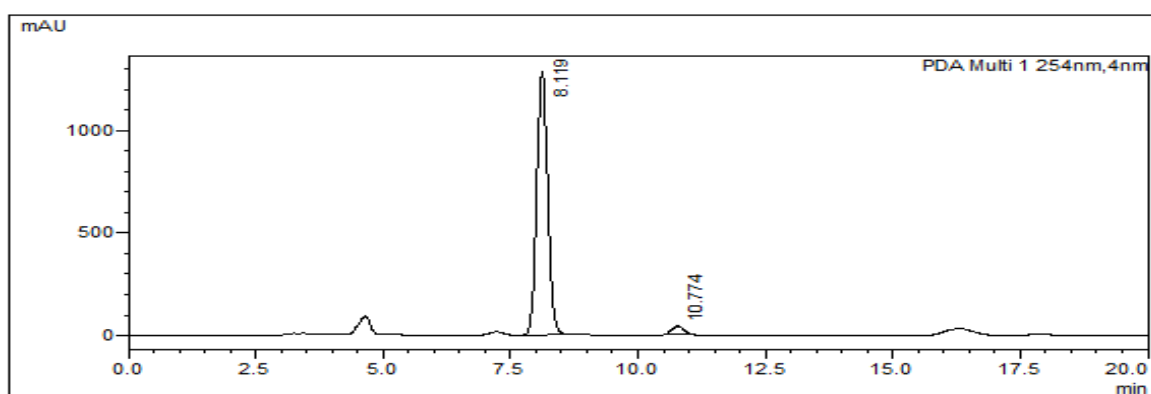

<Peak Table>

| PDACh1 254nm |           |          |         |         |         |
|--------------|-----------|----------|---------|---------|---------|
| Peak#        | Ret. Time | Area     | Height  | Area%   | Height% |
| 1            | 8.119     | 19189186 | 1283651 | 96.569  | 96.853  |
| 2            | 10.774    | 681671   | 41711   | 3.431   | 3.147   |
| Total        |           | 19870857 | 1325362 | 100.000 | 100.000 |

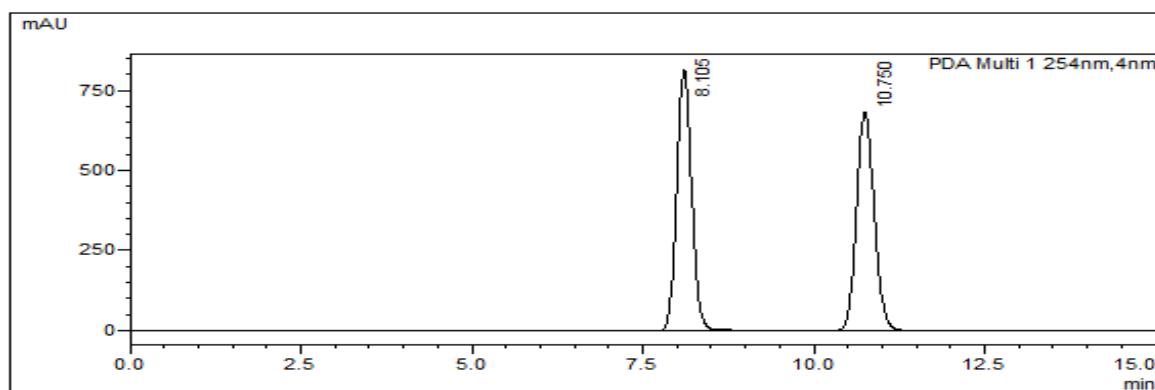

<Peak Table>

| PDACh1 254nm |           |          |         |         |         |
|--------------|-----------|----------|---------|---------|---------|
| Peak#        | Ret. Time | Area     | Height  | Area%   | Height% |
| 1            | 8.105     | 12412304 | 816438  | 50.200  | 54.397  |
| 2            | 10.750    | 12313202 | 684455  | 49.800  | 45.603  |
| Total        |           | 24725506 | 1500893 | 100.000 | 100.000 |

**(2*S*,7*aR*)-7*a*-(3,4-Dimethoxybenzyl)-2-ethoxy-7-oxo-2,4,5,6,7,7*a*-hexahydro-1*H*-indene-3-carbaldehyde (2*u*):**

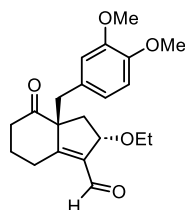

Prepared according to the general procedure as described above in 76% yield (81mg; *dr*= 14:1). It was purified by flash chromatography (50% EtOAc/hexane;  $R_f$  = 0.3) to afford yellow liquid;  $^1\text{H}$  NMR (400 MHz,  $\text{CDCl}_3$ )  $\delta$  9.80 (s, 1H), 6.75 (d,  $J$  = 8.2 Hz, 1H), 6.56 (dd,  $J$  = 8.2, 2.0 Hz, 1H), 6.49 (d,  $J$  = 1.9 Hz, 1H), 3.89 (dd,  $J$  = 11.3, 5.0 Hz, 1H), 3.85 (s, 3H), 3.80 (s, 3H), 3.54 (dt,  $J$  = 6.4, 3.6 Hz, 1H), 3.49 – 3.35 (m, 2H), 3.04 (d,  $J$  = 13.5 Hz, 1H), 2.80 (d,  $J$  = 13.4 Hz, 1H), 2.77 – 2.69 (m, 1H), 2.67 – 2.57 (m, 1H), 2.53 (dt,  $J$  = 15.6, 3.4 Hz, 1H), 2.35 (dd,  $J$  = 14.0, 7.2 Hz, 1H), 2.29 – 2.20 (m, 1H), 2.14 (dd,  $J$  = 13.9, 6.1 Hz, 1H), 1.90 – 1.73 (m, 1H), 1.10 (t,  $J$  = 7.0 Hz, 3H);  $^{13}\text{C}$  NMR (101 MHz,  $\text{CDCl}_3$ )  $\delta$  210.5, 188.9, 162.7, 148.7, 148.6, 137.8, 127.6, 122.5, 113.3, 111.1, 79.9, 67.5, 65.1, 56.1, 56.0, 43.3, 38.4, 37.0, 23.9, 23.6, 15.6; HRMS (ESI) calcd for  $\text{C}_{21}\text{H}_{27}\text{O}_5$   $[\text{M}+\text{H}]^+$ : 359.1853; found: 359.1847;  $[\alpha]_{\text{D}}^{20}$  =  $-40.66^\circ$  ( $c$  1.0,  $\text{CHCl}_3$ ); 90:10*er*; Chiral HPLC analysis of the product: Daicel Chiralpak AD-H 250X4.6 mm 5 $\mu$  column; hexane/2-propanol = 92:08, detected at 254 nm, Flow rate = 1 mL/min, Retention times: 17.19 min (major), 18.35 min (minor).

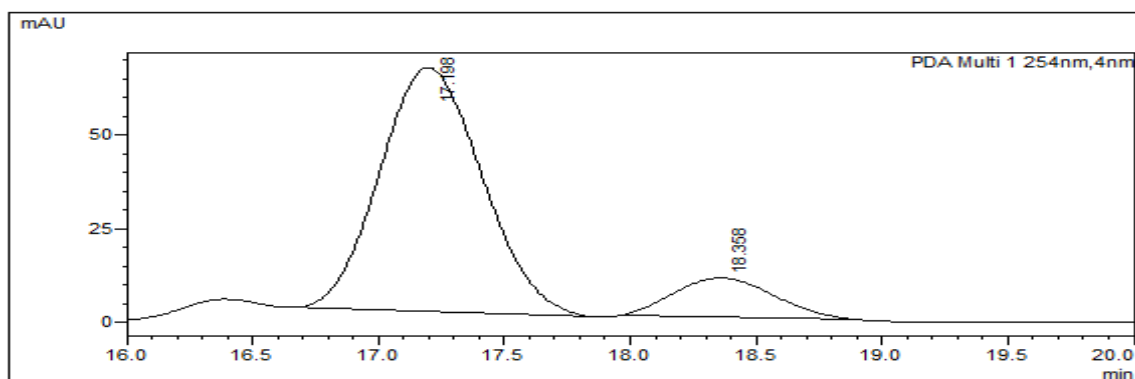

**<Peak Table>**

| PDA Ch1 254nm |           |         |        |         |         |
|---------------|-----------|---------|--------|---------|---------|
| Peak#         | Ret. Time | Area    | Height | Area%   | Height% |
| 1             | 17.198    | 1820446 | 64945  | 89.769  | 88.146  |
| 2             | 18.358    | 207480  | 8734   | 10.231  | 11.854  |
| Total         |           | 2027926 | 73679  | 100.000 | 100.000 |

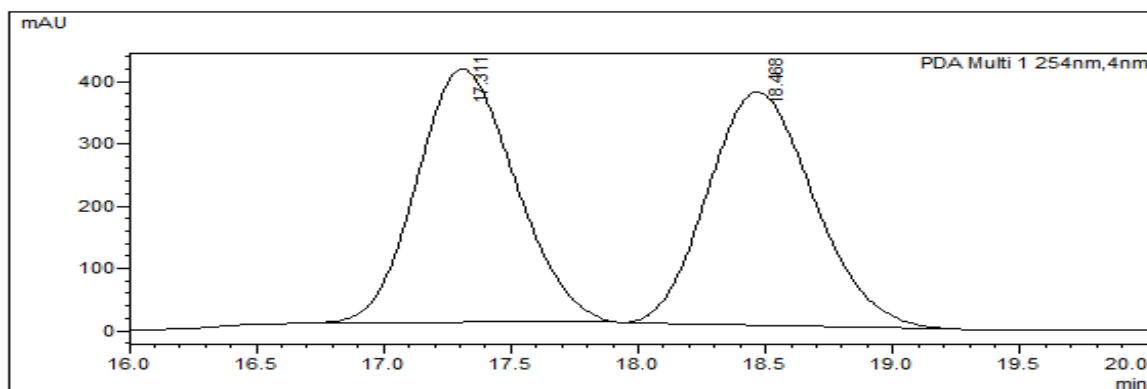

<Peak Table>

| PDA Ch1 254nm |           |          |        |         |         |
|---------------|-----------|----------|--------|---------|---------|
| Peak#         | Ret. Time | Area     | Height | Area%   | Height% |
| 1             | 17.311    | 10926119 | 407111 | 50.410  | 52.180  |
| 2             | 18.468    | 10748341 | 373093 | 49.590  | 47.820  |
| Total         |           | 21674460 | 780203 | 100.000 | 100.000 |

(2*S*,7*aR*)-7*a*-(2,3-Dichlorobenzyl)-2-ethoxy-7-oxo-2,4,5,6,7,7*a*-hexahydro-1*H*-indene-3-carbaldehyde (2*v*):

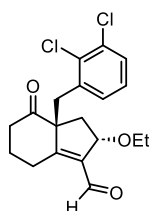

Prepared according to the general procedure as described above in 85% yield (93mg; *dr* = >20:1, with inseparable impurities). It was purified by flash chromatography (50% EtOAc/hexane; *R<sub>f</sub>* = 0.4) to afford colourless liquid; <sup>1</sup>H NMR (400 MHz, CDCl<sub>3</sub>) δ 9.88 (s, 1H), 7.39 (dd, *J* = 8.0, 1.5 Hz, 1H), 7.11 (t, *J* = 7.9 Hz, 1H), 6.89 (dd, *J* = 7.8, 1.5 Hz, 1H), 4.23 (td, *J* = 6.7, 2.9 Hz, 1H), 3.55 – 3.44 (m, 3H), 3.31 (d, *J* = 14.0 Hz, 1H), 3.12 (d, *J* = 14.0 Hz, 1H), 2.78 (ddd, *J* = 15.4, 13.0, 6.0 Hz, 1H), 2.68 – 2.60 (m, 1H), 2.59 – 2.53 (m, 1H), 2.35 (dd, *J* = 14.2, 7.0 Hz, 1H), 2.31 – 2.18 (m, 1H), 2.10 (dd, *J* = 14.2, 6.4 Hz, 1H), 1.81 (ddt, *J* = 26.1, 13.1, 4.4 Hz, 1H), 1.12 (t, *J* = 7.0 Hz, 3H); <sup>13</sup>C NMR (101 MHz, CDCl<sub>3</sub>) δ 209.8, 187.9, 167.9, 137.5, 137.1, 133.7, 133.2, 130.8, 129.6, 127.1, 78.9, 67.8, 65.7, 42.2, 39.3, 35.4, 24.1, 23.9, 15.6; HRMS (ESI) calcd for C<sub>19</sub>H<sub>21</sub>O<sub>3</sub>Cl<sub>2</sub> [M+H]<sup>+</sup>: 367.0862; found: 367.0859; [α]<sub>D</sub><sup>20</sup> = -81.65° (*c* 1.0, CHCl<sub>3</sub>); 98:2*er*; Chiral HPLC analysis of the product: Daicel Chiralpak AD-H 250X4.6 mm 5μ column; hexane/2-propanol = 90:10, detected at 254 nm, Flow rate = 1 mL/min, Retention times: 8.42 min (major), 10.29 min (minor).

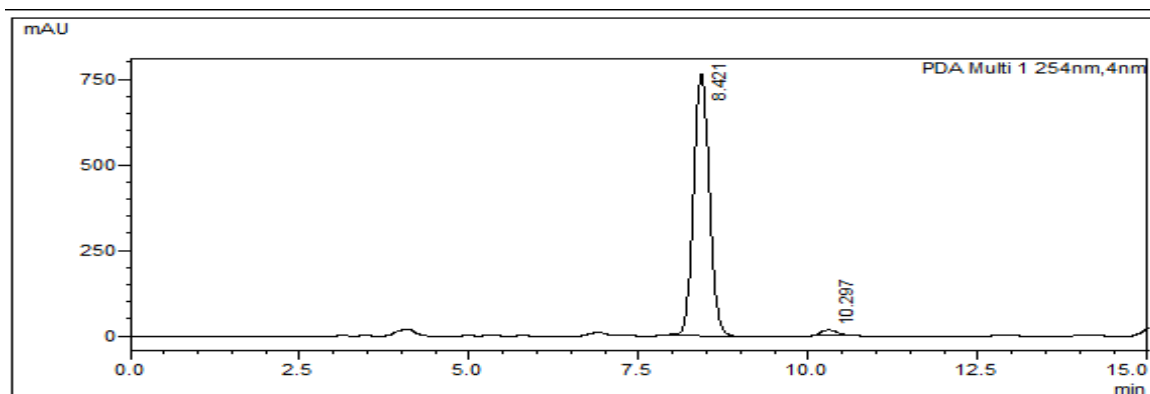

<Peak Table>

| PDA Ch1 254nm |           |          |        |         |         |
|---------------|-----------|----------|--------|---------|---------|
| Peak#         | Ret. Time | Area     | Height | Area%   | Height% |
| 1             | 8.421     | 12417949 | 765351 | 97.983  | 97.955  |
| 2             | 10.297    | 255603   | 15982  | 2.017   | 2.045   |
| Total         |           | 12673552 | 781333 | 100.000 | 100.000 |

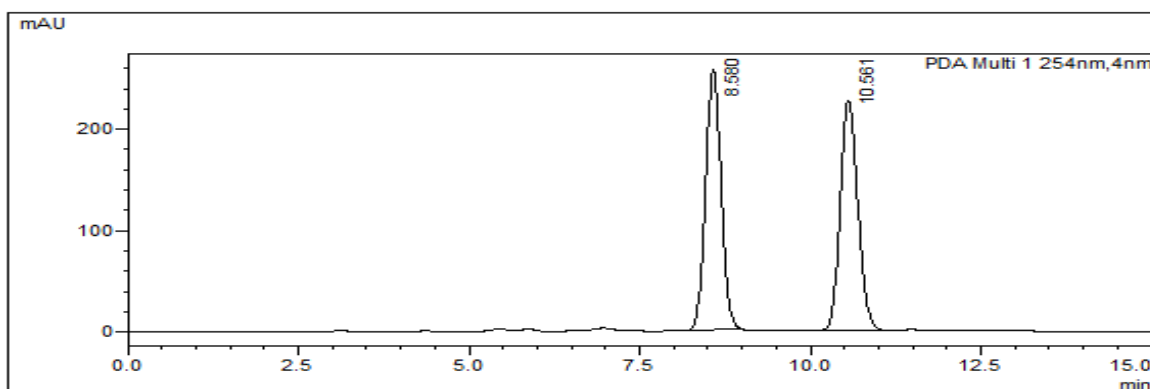

<Peak Table>

| PDA Ch1 254nm |           |         |        |         |         |
|---------------|-----------|---------|--------|---------|---------|
| Peak#         | Ret. Time | Area    | Height | Area%   | Height% |
| 1             | 8.580     | 4070035 | 257172 | 50.095  | 53.274  |
| 2             | 10.561    | 4054650 | 225563 | 49.905  | 46.726  |
| Total         |           | 8124685 | 482735 | 100.000 | 100.000 |

(2*S*,7*aR*)-2-Ethoxy-7*a*-(naphthalen-1-ylmethyl)-7-oxo-2,4,5,6,7,7*a*-hexahydro-1*H*-indene-3-carbaldehyde (2w):

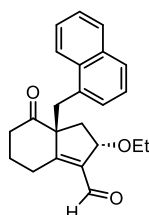

Prepared according to the general procedure as described above in 72% yield (75 mg; *dr* = >20:1). It was purified by flash chromatography (50% EtOAc/hexane; *R<sub>f</sub>* = 0.3) to afford yellow liquid; <sup>1</sup>H NMR

(400 MHz, CDCl<sub>3</sub>)  $\delta$  10.02 (s, 1H), 8.21 – 8.17 (m, 1H), 7.86 – 7.83 (m, 1H), 7.76 (d,  $J$  = 8.2 Hz, 1H), 7.52 – 7.45 (m, 2H), 7.38 (dd,  $J$  = 8.2, 7.2 Hz, 1H), 7.18 (dd,  $J$  = 7.1, 0.8 Hz, 1H), 4.63 (dd,  $J$  = 5.0, 2.0 Hz, 1H), 3.95 (d,  $J$  = 14.2 Hz, 1H), 3.70 (d,  $J$  = 14.2 Hz, 1H), 3.66 – 3.55 (m, 2H), 3.24 (dt,  $J$  = 14.6, 3.0 Hz, 1H), 2.59 – 2.43 (m, 2H), 2.18 – 2.15 (m, 2H), 2.09 (ddd,  $J$  = 14.6, 12.9, 5.3 Hz, 1H), 2.03 – 1.94 (m, 1H), 1.57 – 1.41 (m, 1H), 1.27 (t,  $J$  = 7.0 Hz, 3H); <sup>13</sup>C NMR (101 MHz, CDCl<sub>3</sub>)  $\delta$  211.2, 187.9, 169.1, 137.8, 134.1, 133.4, 132.9, 128.9, 128.2, 128.0, 126.2, 125.9, 125.3, 124.5, 78.8, 69.1, 65.9, 42.0, 40.0, 37.0, 24.2, 23.7, 15.7; HRMS:(ESI) calcd for C<sub>23</sub>H<sub>25</sub>O<sub>3</sub>[M+H]<sup>+</sup>: 349.1798; found: 349.1791;  $[\alpha]_D^{20}$  = +45.50° ( $c$  1.0, CHCl<sub>3</sub>); 83:17*er*; Chiral HPLC analysis of the product: Daicel Chiralpak AD-H 250X4.6 mm 5 $\mu$  column; hexane/2-propanol = 90:10, detected at 290 nm, Flow rate = 1 mL/min, Retention times: 9.00 min (major), 9.93 min (minor).

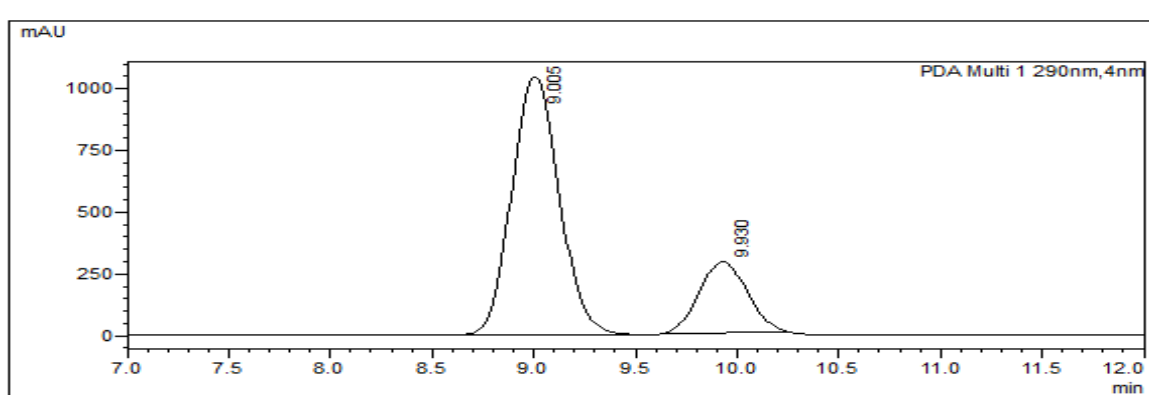

<Peak Table>

| Peak# | Ret. Time | Area     | Height  | Area%   | Height% |
|-------|-----------|----------|---------|---------|---------|
| 1     | 9.005     | 16937764 | 1042415 | 82.889  | 80.948  |
| 2     | 9.930     | 3496579  | 245351  | 17.111  | 19.052  |
| Total |           | 20434342 | 1287766 | 100.000 | 100.000 |

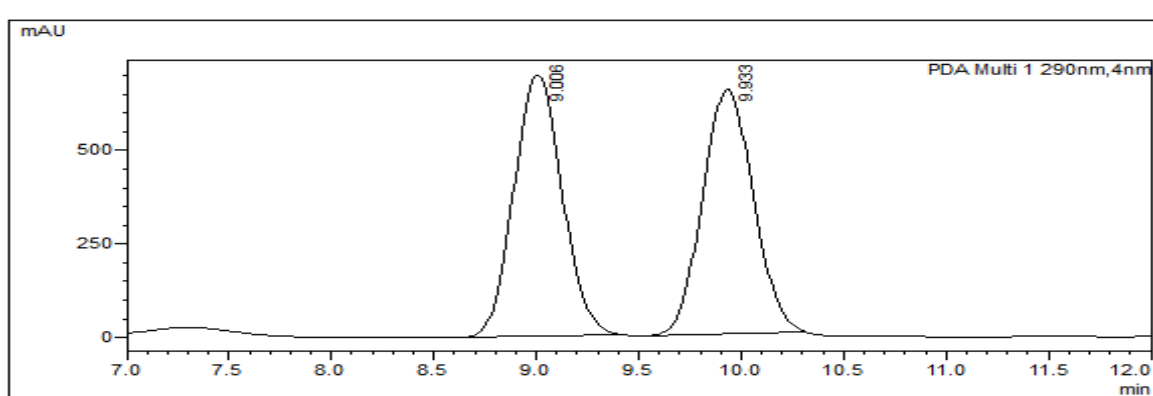

<Peak Table>

| Peak# | Ret. Time | Area     | Height  | Area%   | Height% |
|-------|-----------|----------|---------|---------|---------|
| 1     | 9.006     | 11495496 | 696312  | 50.457  | 51.615  |
| 2     | 9.933     | 11287181 | 652744  | 49.543  | 48.385  |
| Total |           | 22782677 | 1349055 | 100.000 | 100.000 |

**(2*S*,7*aR*)-2-Ethoxy-7-oxo-7a-(thiophen-2-ylmethyl)-2,4,5,6,7,7a-hexahydro-1*H*-indene-3-carbaldehyde (2x):**

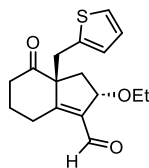

Prepared according to the general procedure as described above in 84% yield (76 mg; *dr* = >20:1). It was purified by flash chromatography (40% EtOAc/hexane; *R<sub>f</sub>* = 0.3) to afford red liquid; <sup>1</sup>H NMR (400 MHz, CDCl<sub>3</sub>) δ 9.85 (s, 1H), 7.17 (dd, *J* = 5.2, 1.1 Hz, 1H), 6.92 (dd, *J* = 5.2, 3.5 Hz, 1H), 6.75 (d, *J* = 2.7 Hz, 1H), 4.14 (ddd, *J* = 7.4, 5.7, 2.8 Hz, 1H), 3.54 – 3.43 (m, 3H), 3.25 (d, *J* = 14.5 Hz, 1H), 3.15 (d, *J* = 14.5 Hz, 1H), 2.76 (ddd, *J* = 15.5, 13.1, 6.1 Hz, 1H), 2.65 – 2.58 (m, 1H), 2.54 (dt, *J* = 15.2, 3.8 Hz, 1H), 2.39 (dd, *J* = 14.3, 7.3 Hz, 1H), 2.30 (dd, *J* = 14.3, 5.6 Hz, 1H), 2.31 – 2.22 (m, 1H), 1.90 – 1.76 (m, 1H), 1.12 (t, *J* = 7.0 Hz, 3H); <sup>13</sup>C NMR (101 MHz, CDCl<sub>3</sub>) δ 209.4, 188.5, 162.6, 138.2, 136.4, 127.7, 127.0, 125.4, 80.0, 67.8, 65.3, 38.2, 37.8, 36.8, 24.0, 23.3, 15.6; HRMS (ESI) calcd for C<sub>17</sub>H<sub>21</sub>O<sub>3</sub>S [M+H]<sup>+</sup>: 305.1205; found: 305.1216; [α]<sub>D</sub><sup>20</sup> = -18.09° (*c* 1.0, CHCl<sub>3</sub>); 91:9*er*; Chiral HPLC analysis of the product: Daicel Chiralpak OD-H 250X4.6 mm 5μ column; hexane/2-propanol = 80:20, detected at 254nm, Flow rate = 1 mL/min, Retention times: 13.40 min (minor), 19.69 min (major).

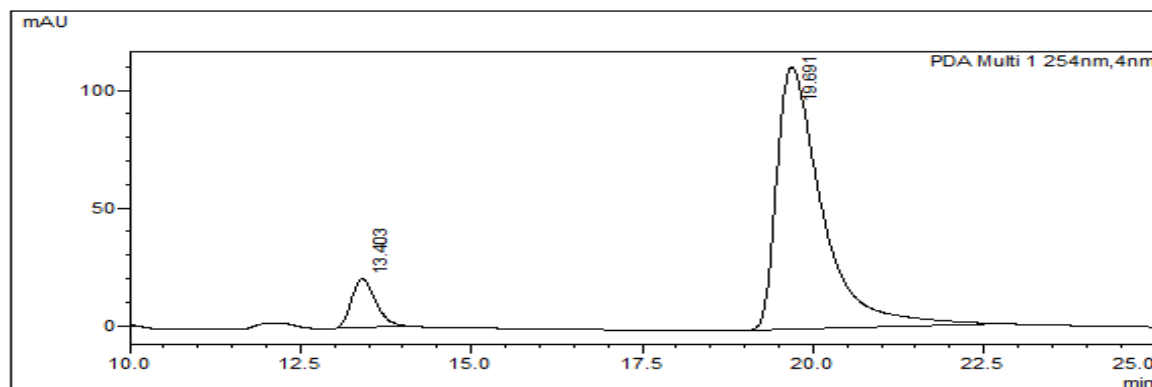

<Peak Table>

| PDACH1 254nm |           |         |        |         |         |
|--------------|-----------|---------|--------|---------|---------|
| Peak#        | Ret. Time | Area    | Height | Area%   | Height% |
| 1            | 13.403    | 511536  | 20684  | 8.972   | 15.647  |
| 2            | 19.691    | 5190222 | 111508 | 91.028  | 84.353  |
| Total        |           | 5701758 | 132192 | 100.000 | 100.000 |

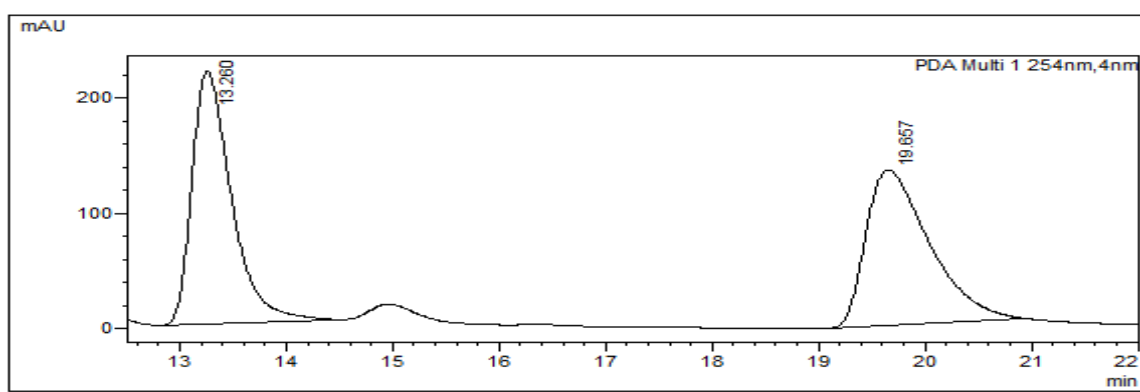

<Peak Table>

| Peak# | Ret. Time | Area     | Height | Area%   | Height% |
|-------|-----------|----------|--------|---------|---------|
| 1     | 13.260    | 5652903  | 219248 | 50.419  | 61.948  |
| 2     | 19.657    | 5558929  | 134676 | 49.581  | 38.052  |
| Total |           | 11211832 | 353924 | 100.000 | 100.000 |

**(2*S*,7*aR*)-2-Ethoxy-7*a*-(furan-2-ylmethyl)-7-oxo-2,4,5,6,7,7*a*-hexahydro-1*H*-indene-3-carbaldehyde(2y):**

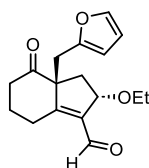

Prepared according to the general procedure as described above in 82% yield (70 mg; *dr* = >20:1). It was purified by flash chromatography (40% EtOAc/hexane; *R<sub>f</sub>* = 0.3) to red liquid; <sup>1</sup>H NMR (400 MHz, CDCl<sub>3</sub>) δ 9.85 (s, 1H), 7.28 (dd, *J* = 1.9, 0.8 Hz, 1H), 6.27 (dd, *J* = 3.2, 1.9 Hz, 1H), 6.05 (d, *J* = 3.6 Hz, 1H), 4.33 (ddd, *J* = 7.4, 5.7, 2.8 Hz, 1H), 3.57 – 3.48 (m, 2H), 3.45 (dt, *J* = 6.2, 3.7 Hz, 1H), 3.02 (s, 2H), 2.76 (ddd, *J* = 15.5, 13.2, 6.1 Hz, 1H), 2.64 – 2.57 (m, 1H), 2.52 (dt, *J* = 15.5, 4.0 Hz, 1H), 2.39 (dd, *J* = 14.2, 7.3 Hz, 1H), 2.29 (dd, *J* = 14.3, 5.6 Hz, 1H), 2.25 – 2.20 (m, 1H), 1.79 (ddt, *J* = 26.2, 13.2, 4.5 Hz, 1H), 1.14 (t, *J* = 7.0 Hz, 3H); <sup>13</sup>C NMR (101 MHz, CDCl<sub>3</sub>) δ 209.2, 188.5, 163.4, 149.8, 142.5, 137.4, 110.7, 108.9, 79.8, 66.8, 65.2, 38.1, 36.9, 36.5, 24.0, 23.2, 15.6; HRMS (ESI) calcd for C<sub>17</sub>H<sub>21</sub>O<sub>4</sub> [M+H]<sup>+</sup>: 289.1434; found: 289.1425; [α]<sub>D</sub><sup>20</sup> = +12.62° (*c* 0.5, CHCl<sub>3</sub>); 94:6 *er*; Chiral HPLC analysis of the product: Daicel Chiralpak OD-H 250X4.6 mm 5μ column; hexane/2-propanol = 80:20, detected at 254 nm, Flow rate = 1 mL/min, Retention times: 8.87 min (minor), 10.12 min (major).

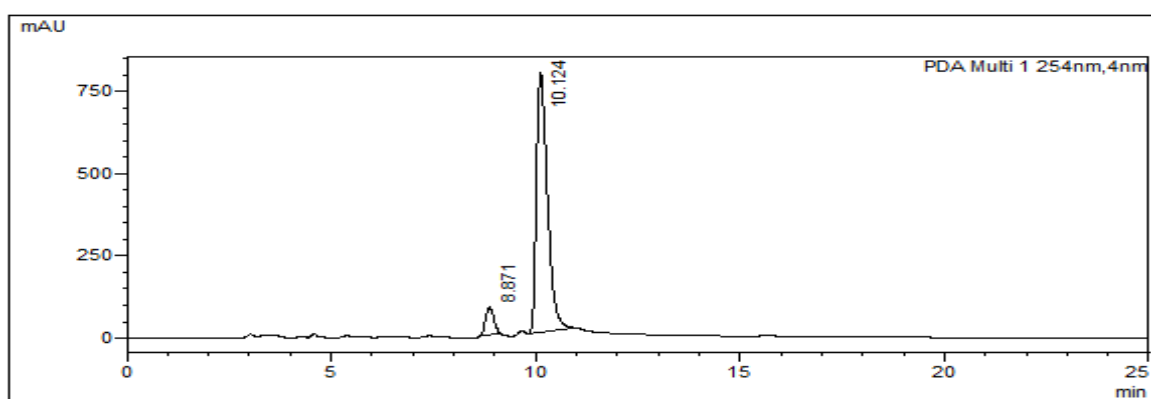

<Peak Table>

| PDACh1 254nm |           |          |        |         |         |
|--------------|-----------|----------|--------|---------|---------|
| Peak#        | Ret. Time | Area     | Height | Area%   | Height% |
| 1            | 8.871     | 926721   | 74391  | 5.883   | 8.599   |
| 2            | 10.124    | 14826207 | 790681 | 94.117  | 91.401  |
| Total        |           | 15752928 | 865072 | 100.000 | 100.000 |

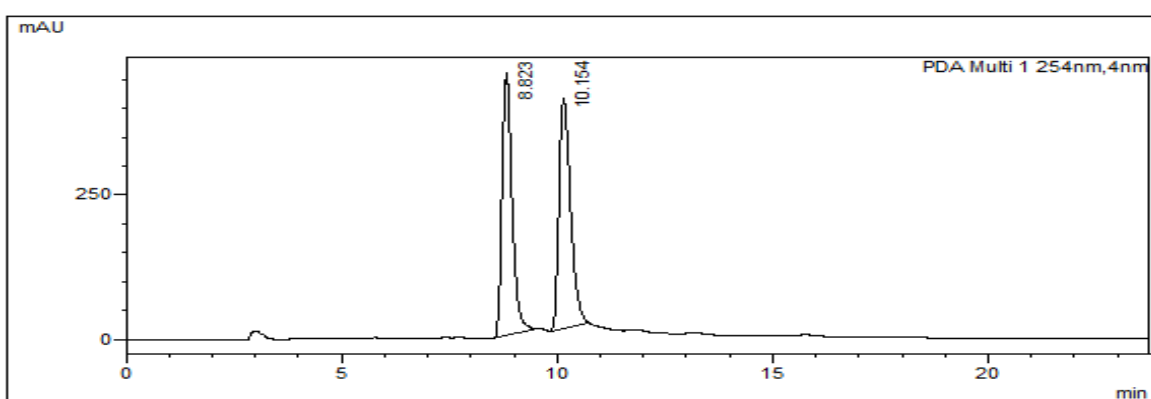

<Peak Table>

| PDACh1 254nm |           |          |        |         |         |
|--------------|-----------|----------|--------|---------|---------|
| Peak#        | Ret. Time | Area     | Height | Area%   | Height% |
| 1            | 8.823     | 7305066  | 453432 | 49.613  | 53.318  |
| 2            | 10.154    | 7418895  | 396992 | 50.387  | 46.682  |
| Total        |           | 14723961 | 850424 | 100.000 | 100.000 |

## IIb. One mmol-Scale reaction and Synthetic utility

### IIba. One-mmol Scale reaction:

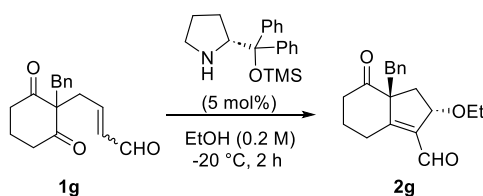

To a stirred solution of enal-tethered Cyclohexane 1,3-dione **1g** (270 mg, 1.0 mmol) in EtOH (5 mL, 0.2 M) at -20 °C was added Jørgensen-Hayashi catalyst **C-I** (16 mg, 0.05 mmol, 5 mol%) under nitrogen atmosphere. The reaction was allowed to stir at the same temperature until complete

consumption of starting material (monitored by TLC). Afterward, the solvent was evaporated under reduced pressure and the crude residue was directly purified by column chromatography on silica gel (EtOAc in Hexane) to give the desired product **2g** in 82% yield (244 mg);  $[\alpha]_{20}^D = -85.91^\circ$  ( $c$  1.0,  $\text{CHCl}_3$ ); 96:4 *er*.

## IIbb. Synthetic utility:

**(2*S*,3*aR*)-3*a*-Benzyl-1-((*Z*)-3-(4-bromophenyl)-3-oxoprop-1-en-1-yl)-2-ethoxy-2,3,3*a*,5,6,7-hexahydro-4*H*-inden-4-one (5):**

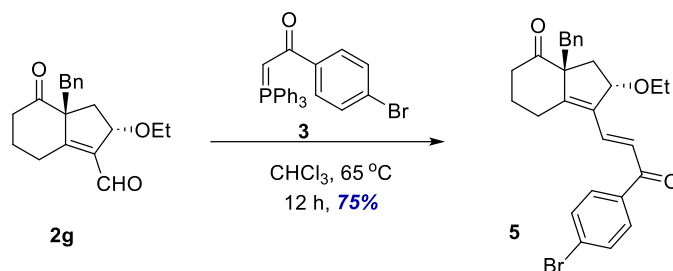

The solution of aldehyde **2g** (60 mg, 0.2 mmol, 1 equiv) in  $\text{CH}_2\text{Cl}_2$  (4 mL, 0.05 M) was added 4-bromo phenyl phosphorene **3** (138 mg, 0.30 mmol, 1.5 equiv) in one portion at room temperature under a nitrogen atmosphere. The reaction mixture was stirred at 65 °C using preheated oil bath for 12h and then concentrated in vacuo. The crude reaction mixture was purified by flash column chromatography (20% EtOAc/hexane;  $R_f = 0.4$ ) to give dienone **5** in 75% yields (72 mg, *dr* = >20:1) as a yellow oil;  $^1\text{H}$  NMR (500 MHz,  $\text{CDCl}_3$ )  $\delta$  7.77 (d,  $J = 8.6$  Hz, 2H), 7.60 (d,  $J = 15.3$  Hz, 1H), 7.60 (d,  $J = 8.7$  Hz, 2H), 7.24 – 7.21 (m, 3H), 7.13 (d,  $J = 15.3$  Hz, 1H), 6.99 (dd,  $J = 6.5, 2.9$  Hz, 2H), 3.73 (td,  $J = 6.8, 2.6$  Hz, 1H), 3.44 (dq,  $J = 9.0, 7.0$  Hz, 1H), 3.25 (dq,  $J = 9.1, 7.0$  Hz, 1H), 3.12 – 3.05 (m, 2H), 2.85 – 2.74 (m, 2H), 2.65 – 2.56 (m, 1H), 2.53 (dt,  $J = 15.2, 3.0$  Hz, 1H), 2.36 (dd,  $J = 13.7, 7.2$  Hz, 1H), 2.30 – 2.23 (m, 1H), 2.19 (dd,  $J = 13.8, 6.7$  Hz, 1H), 1.75 (dt,  $J = 26.2, 13.2, 4.4$  Hz, 1H), 1.16 (t,  $J = 7.0$  Hz, 3H);  $^{13}\text{C}$  NMR (101 MHz,  $\text{CDCl}_3$ )  $\delta$  211.0, 189.9, 155.0, 137.2, 135.8, 135.7, 135.3, 132.0, 130.1, 130.0, 128.3, 127.9, 127.3, 123.0, 80.9, 66.8, 63.1, 43.3, 38.5, 35.8, 24.7, 23.8, 15.7; HRMS (ESI) calcd for  $\text{C}_{27}\text{H}_{27}\text{O}_3\text{BrNa}$   $[\text{M}+\text{Na}]^+$ : 501.1035; found: 501.1048;  $[\alpha]_{20}^D = -101.99^\circ$  ( $c$  1.0,  $\text{CHCl}_3$ ).

**Ethyl (*E*)-3-((2*S*,7*aR*)-7*a*-benzyl-2-ethoxy-7-oxo-2,4,5,6,7,7*a*-hexahydro-1*H*-inden-3-yl)acrylate(6):**

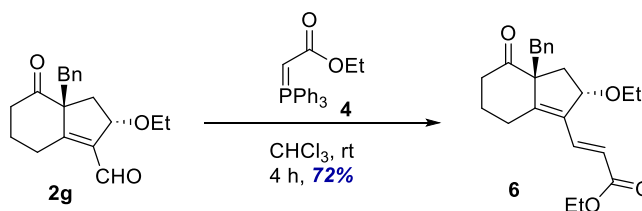

The solution of aldehyde **2g** (60 mg, 0.2 mmol, 1 equiv) in CH<sub>2</sub>Cl<sub>2</sub> (3 mL, 0.1 M) was added desired phosphorene (105 mg, 0.30 mmol, 1.5 equiv) in one portion at room temperature under a nitrogen atmosphere. The reaction mixture was stirred at room temperature for 2h and then concentrated in vacuo. The crude reaction mixture was purified by flash column chromatography (20% EtOAc/hexane; *R<sub>f</sub>* = 0.5) to give bicyclic ester **6** in 72% yield (53 mg, *dr* = >20:1) as an yellow oil; <sup>1</sup>H NMR (500 MHz, CDCl<sub>3</sub>) δ 7.43 (d, *J* = 15.8 Hz, 1H), 7.24 – 7.19 (m, 3H), 6.99 – 6.95 (m, 2H), 5.97 (d, *J* = 15.7 Hz, 1H), 4.27 – 4.12 (m, 2H), 3.60 (td, *J* = 6.7, 2.7 Hz, 1H), 3.37 (dq, *J* = 9.0, 7.0 Hz, 1H), 3.19 (dq, *J* = 9.0, 7.0 Hz, 1H), 3.06 (d, *J* = 13.2 Hz, 1H), 3.00 (dt, *J* = 14.5, 2.9 Hz, 1H), 2.77 (d, *J* = 13.2 Hz, 1H), 2.76 (ddd, *J* = 19.5, 11.3, 3.9 Hz, 1H), 2.60 – 2.53 (m, 1H), 2.50 (dt, *J* = 15.3, 4.3 Hz, 1H), 2.31 (dd, *J* = 13.8, 7.1 Hz, 1H), 2.26 – 2.19 (m, 1H), 2.12 (dd, *J* = 13.8, 6.5 Hz, 1H), 1.74 (dt, *J* = 26.4, 13.2, 4.4 Hz, 1H), 1.29 (t, *J* = 7.1 Hz, 3H), 1.10 (t, *J* = 7.0 Hz, 3H); <sup>13</sup>C NMR (101 MHz, CDCl<sub>3</sub>) δ 211.3, 167.8, 152.3, 135.7, 135.5, 134.9, 130.1, 128.3, 127.3, 120.0, 80.8, 66.5, 63.4, 60.5, 43.2, 38.6, 35.9, 24.7, 23.6, 15.5, 14.5; HRMS (ESI) calcd for C<sub>23</sub>H<sub>28</sub>O<sub>4</sub>Na [M+Na]<sup>+</sup>: 391.1885; found: 391.1889; [α]<sub>D</sub><sup>20</sup> = -17.00° (c 1.0, CHCl<sub>3</sub>).

**(2*S*,3*aR*)-3*a*-Benzyl-2-ethoxy-1-(hydroxymethyl)-2,3,3*a*,5,6,7-hexahydro-4*H*-inden-4-one (**7**):**

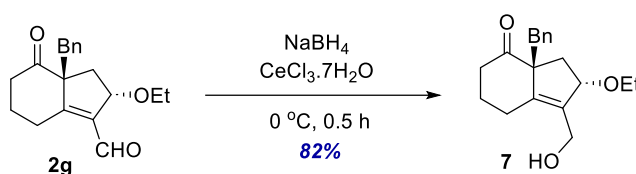

To a solution of **2g** (60 mg, 0.2 mmol, 1 equiv) and CeCl<sub>3</sub>·7H<sub>2</sub>O (112 mg, 1.5 equiv) in 3 mL of MeOH was added NaBH<sub>4</sub> (11 mg, 1.5 equiv) over a period of 5 min. The reaction mixture was stirred for 30 min at room temperature, quenched with H<sub>2</sub>O (5 mL), extracted with ethyl acetate (3×5 mL), dried over Na<sub>2</sub>SO<sub>4</sub>, concentrated under vacuo, and then purified by flash chromatography (30% EtOAc in hexanes; *R<sub>f</sub>* = 0.3) to afford a colourless oil (49 mg, 82% yield *dr* = >20:1); <sup>1</sup>H NMR (400 MHz, CDCl<sub>3</sub>) δ 7.26 – 7.21 (m, 3H), 7.04 – 6.98 (m, 2H), 4.22 (d, *J* = 12.4 Hz, 1H), 3.99 (d, *J* = 12.4 Hz, 1H), 3.50 – 3.38 (m, 2H), 3.19 (dq, *J* = 9.1, 7.0 Hz, 1H), 2.99 (d, *J* = 13.2 Hz, 1H), 2.79 – 2.70 (m, 3H), 2.47 (dt, *J* = 15.2, 3.1 Hz, 1H), 2.43 – 2.33 (m, 2H), 2.28 (dd, *J* = 13.5, 6.8 Hz, 1H), 2.22 – 2.11 (m, 1H), 2.02 (dd, *J* = 13.5, 6.7 Hz, 1H), 1.79 (dt, *J* = 26.4, 13.2, 4.4 Hz, 1H), 1.08 (t, *J* = 7.0 Hz, 3H); <sup>13</sup>C NMR (101 MHz, CDCl<sub>3</sub>) δ 212.4, 142.2, 136.7, 136.1, 130.2, 128.1, 127.2, 84.2, 65.9, 64.6, 58.4, 42.5, 38.6, 36.9, 25.2, 22.8, 15.5; HRMS (ESI) calcd for C<sub>19</sub>H<sub>24</sub>O<sub>3</sub>Na [M+Na]<sup>+</sup>: 323.1623; found: 323.1631; [α]<sub>D</sub><sup>20</sup> = +15.83° (c 1.0, CHCl<sub>3</sub>).

**(2*S*,7*aR*)-7*a*-Benzyl-2-ethoxy-7-oxo-*N*-(pyridin-2-yl)-2,4,5,6,7,7*a*-hexahydro-1*H*-indene-3-carboxamide(**8**):**

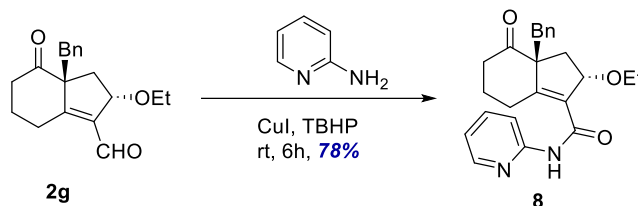

A sealable reaction tube equipped with a magnetic stirrer bar was charged with aldehyde **2g** (60 mg, 0.2 mmol), amines (22 mg, 1.2 equiv, 0.2 mmol), CuI (5 mg, 0.05 equiv, 0.03 mmol), tert-butyl hydroperoxide (TBHP, 36 mg, 2 equiv, 0.4 mmol), water (1 mL). The reaction vessel was carried out at room temperature. After stirring the mixture for 6 h, it was diluted with ethyl acetate, washed with water and brine, dried with Mg<sub>2</sub>SO<sub>4</sub>. After the solvent was removed under reduced pressure, the residue was purified by column chromatography on silica gel using petroleum ether/ethyl acetate as eluent to afford the corresponding product in 78% yield (61 mg; *dr* = >20:1). It was purified by flash chromatography (10%EtOAc/hexane; *R<sub>f</sub>* = 0.4) to afford a yellow liquid; <sup>1</sup>H NMR (400 MHz, CDCl<sub>3</sub>) δ 10.17 (s, 1H), 8.32 (dd, *J* = 58.4, 6.2 Hz, 2H), 7.80 (t, *J* = 7.3 Hz, 1H), 7.28 – 7.25 (m, 3H), 7.11 – 7.02 (m, 3H), 3.89 (dt, *J* = 15.5, 3.4 Hz, 1H), 3.86 – 3.78 (m, 1H), 3.63 – 3.53 (m, 1H), 3.52 – 3.43 (m, 1H), 3.10 (d, *J* = 13.3 Hz, 1H), 2.86 (d, *J* = 13.2 Hz, 1H), 2.79 (dd, *J* = 18.6, 11.1, 4.2 Hz, 1H), 2.74 – 2.64 (m, 1H), 2.52 (dt, *J* = 15.3, 3.6 Hz, 1H), 2.40 (dd, *J* = 13.6, 6.9 Hz, 1H), 2.27 – 2.20 (m, 1H), 2.17 (dd, *J* = 13.7, 6.6 Hz, 1H), 1.80 (ddt, *J* = 26.0, 13.0, 4.5 Hz, 1H), 1.25 (t, *J* = 7.0 Hz, 3H); <sup>13</sup>C NMR (101 MHz, CDCl<sub>3</sub>) δ 211.3, 163.5, 160.2, 151.1, 135.3, 130.6, 130.3, 130.0, 128.6, 128.4, 127.5, 119.6, 115.1, 80.8, 66.2, 64.5, 43.4, 38.5, 36.7, 24.6, 24.2, 15.4; HRMS (ESI) calcd for C<sub>24</sub>H<sub>27</sub>O<sub>3</sub>N<sub>2</sub> [M+H]<sup>+</sup>: 391.2016; found: 391.2029; [α]<sub>D</sub><sup>20</sup> = +11.00 ° (*c* 1.0, CHCl<sub>3</sub>).

**(2*S*,3*aR*)-3*a*-Benzyl-2-ethoxy-1-ethynyl-2,3,3*a*,5,6,7-hexahydro-4*H*-inden-4-one (**9**):**

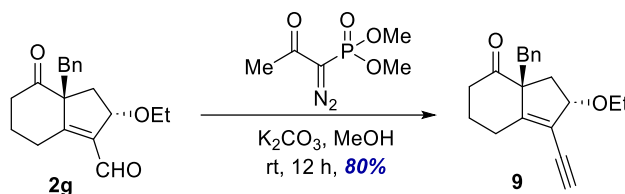

To a solution of **2g** (60 mg, 0.2 mmol) and dimethyldiazomethylphosphonate (Ohira-Bestmann reagent) (46 mg, 1.25 equiv, 0.25 mmol) in dry methanol (2mL), was added potassium carbonate (41 mg, 1.5 equiv, 0.3mmol) at 0 °C under argon atmosphere. The mixture was stirred at 0°C for 30 min and room temperature for 12h. After addition of EtOAc (5 mL) and aqueous saturated ammonium chloride (2 mL), the organic layer was separated, and the aqueous layer was extracted with EtOAc (5

mL x 2). The combined organic layers were dried, concentrated. Flash column chromatography of crude reaction mixture on silica gel (20% EtOAc/hexane;  $R_f$  = 0.6) to afford desired alkyne **9** in 80% yield (47 mg,  $dr$  = >20:1) as a brown solid; mp = 80–82 °C;  $^1\text{H}$  NMR (400 MHz,  $\text{CDCl}_3$ )  $\delta$  7.31 – 7.24 (m, 3H), 7.05 – 7.02 (m, 2H), 3.48 – 3.33 (m, 3H), 3.12 (br.s, 1H), 3.03 (d,  $J$  = 13.2 Hz, 1H), 2.97 (dt,  $J$  = 14.5, 4.3 Hz, 1H), 2.77 (d,  $J$  = 13.2 Hz, 1H), 2.70 (ddd,  $J$  = 19.4, 11.4, 3.9 Hz, 1H), 2.56 – 2.41 (m, 2H), 2.28 (dd,  $J$  = 13.7, 7.1 Hz, 1H), 2.22 – 2.10 (m, 1H), 2.06 (dd,  $J$  = 13.7, 7.0 Hz, 1H), 1.76 (tdd,  $J$  = 17.8, 8.9, 4.5 Hz, 1H), 1.09 (t,  $J$  = 7.0 Hz, 3H);  $^{13}\text{C}$  NMR (101 MHz,  $\text{CDCl}_3$ )  $\delta$  211.5, 154.4, 135.8, 130.2, 128.3, 127.3, 121.9, 82.5, 82.1, 78.4, 65.7, 64.6, 42.8, 38.5, 37.2, 24.7, 24.5, 15.5; HRMS (ESI) calcd for  $\text{C}_{20}\text{H}_{22}\text{O}_2\text{Na}$   $[\text{M}+\text{Na}]^+$ : 317.1512; found: 317.1517;  $[\alpha]^{20}_{\text{D}}$  = -40.57° (c 1.0,  $\text{CHCl}_3$ ).

### IIbc. Standard reaction with **1g** in BnOH solvent:

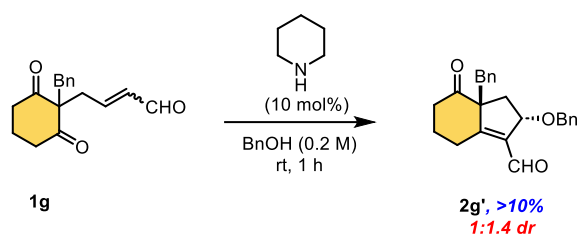

To a stirred solution of enal-tethered cyclohexane 1,3-dione **1g** (0.3 mmol) in BnOH (1.5 mL, 0.2 M) at room temperature was added piperidine (10.2 mg, 0.03 mmol, 10 mol%) under nitrogen atmosphere. The reaction was allowed to stir at the same temperature until complete consumption of starting material (monitored by TLC). Afterward, the solvent was evaporated under reduced pressure at 40–45°C (rotary evaporator water bath) and the crude residue was directly purified by column chromatography on silica gel (EtOAc in Hexane) to give the desired product **2g'** in >10% yield with 1:1.4 ratio of diastereoselectivity ( $dr$ ). However, asymmetric reaction with Jørgensen-Hayashi catalyst **C-I** at various temperatures failed to give the desired product and most of the starting material was recovered.

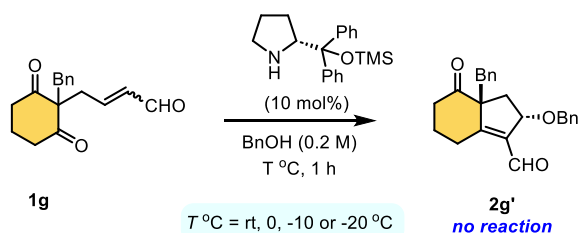

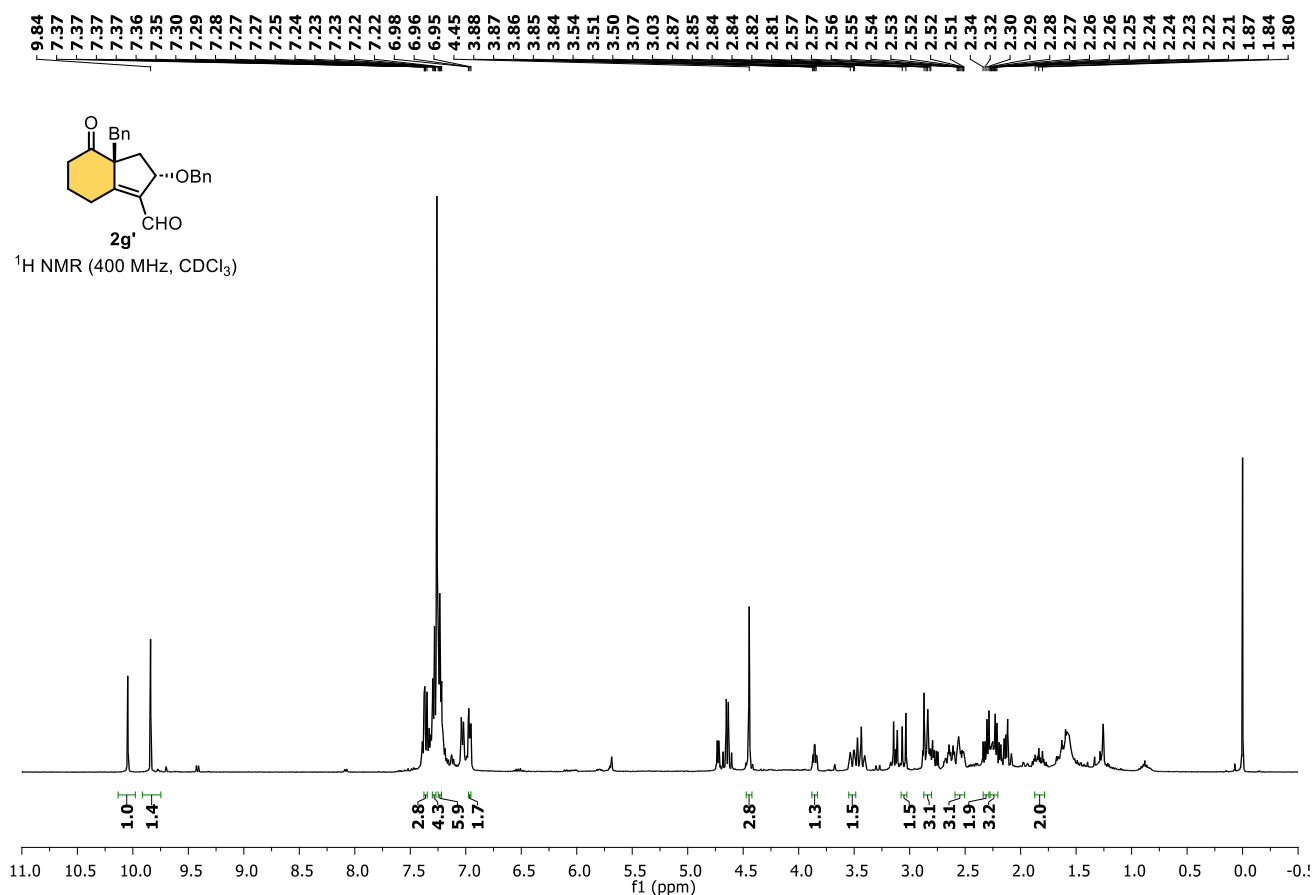

## Iic. Labeling Experiments.

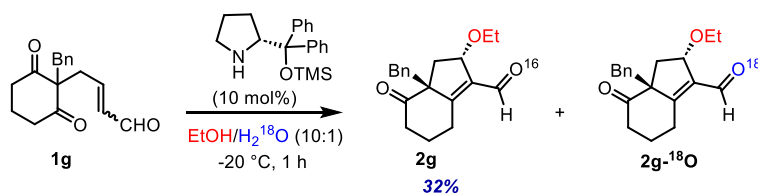

Major peak at *m/z* = 321.1424 for product **2g** was detected in HRMS analysis

To a stirred solution of enal-tethered cyclohexane 1,3-dione **1g** (30 mg, 0.1 mmol) in EtOH (1.0 mL, 0.1 M) and H<sub>2</sub><sup>18</sup>O (0.1 mL) at -20 °C was added Jørgensen-Hayashi catalyst **C-I** (3.6 mg, 0.01 mmol, 10 mol%) under nitrogen atmosphere. The reaction was allowed to stir at the same temperature until complete consumption of starting material (monitored by TLC). Afterward, the solvent was concentrated under reduced pressure and residue was directly subjected to flash column chromatography on silica gel (hexanes/ethyl acetate) to afford the desired product **2g** in 32% yield (10 mg). No <sup>18</sup>O incorporation was detected in HRMS analysis.

## Elemental Composition Report

### Single Mass Analysis

Tolerance = 15.0 PPM / DBE: min = -1.5, max = 50.0

Element prediction: Off

Number of isotope peaks used for i-FIT = 3

Monoisotopic Mass, Even Electron Ions

291 formula(e) evaluated with 1 results within limits (up to 50 closest results for each mass)

Elements Used:

C: 0-20 H: 0-23 N: 0-1 O: 0-4 Na: 0-1 S: 0-1 Br: 0-1 I: 0-2

17-Oct-2023

17OCT2023\_CRB\_A\_298\_1 18 (0.341) AM2 (Ar,12000.0,0.00,0.00); Cm (15:21-(24:30+6:11))

1: TOF MS ES+  
5.09e+007

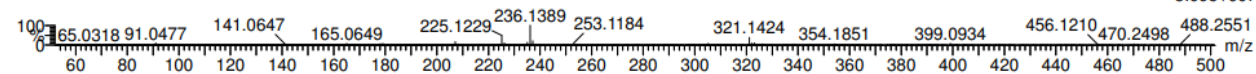

Minimum: -1.5  
Maximum: 5.0 15.0 50.0

| Mass     | Calc. Mass | mDa  | PPM   | DBE | i-FIT | Norm | Conf (%) | Formula       |
|----------|------------|------|-------|-----|-------|------|----------|---------------|
| 321.1424 | 321.1467   | -4.3 | -13.4 | 8.5 | 511.7 | n/a  | n/a      | C19 H22 O3 Na |

17-Oct-2023

17OCT2023\_CRB\_A\_298\_1 18 (0.341) AM2 (Ar,12000.0,0.00,0.00); Cm (15:21-(24:30+6:11))

1: TOF MS ES+  
5.09e7

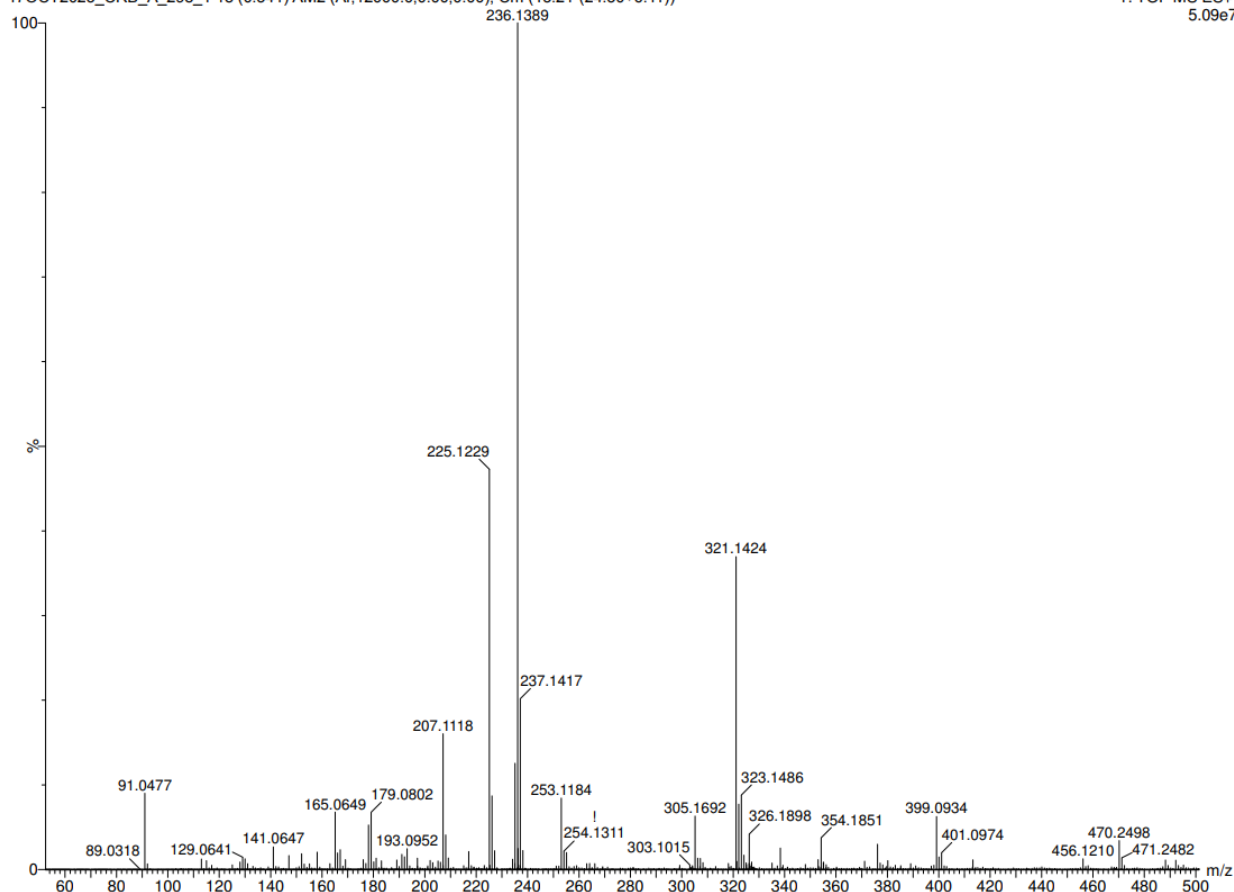

## IId. General procedure for the synthesis of enal-tethered cyclohexane 1,3-diones **1** & analytical data:

### IIda. Synthesis and analytical data of substrate **1**:

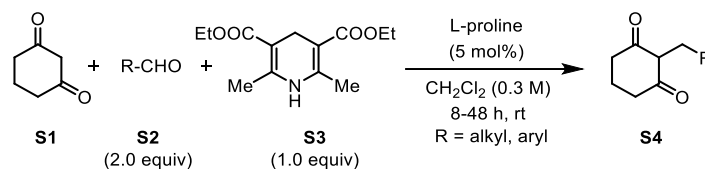

2-substituted 1,3-cyclohexadienones **S4** were prepared using the Ramachary reductive coupling protocol.<sup>1</sup>

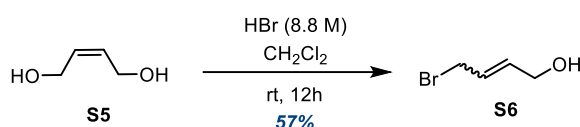

To a  $\text{CH}_2\text{Cl}_2$  (300 mL) solution of (Z)-2-buten-1,4-diol (**S5**) (44.0 g, 41.2 mL, 0.5 mol) at 0 °C was added hydrobromic acid (HBr, 8.8M, 142 mL, 1.25 mol) over 20 min. The resulting mixture was then allowed to react at room temperature for 12 h and the reaction mixture slowly becoming into dark grey colour. The reaction was quenched by adding brine solution (300 mL) and extracted with  $\text{CH}_2\text{Cl}_2$  (6  $\times$  300 mL). The combined organic extracts were dried over  $\text{MgSO}_4$ , filtrated, and the solvent was removed with a rotary evaporator (30 °C, 300 mbar). The residue was purified by flash column chromatography (silica gel,  $\text{CH}_2\text{Cl}_2$ ) to afford the bromo allyl alcohol **S6** (42.8 g, 57%, *E/Z* = 9:1) as a grey liquid.<sup>2</sup>

### General procedure:

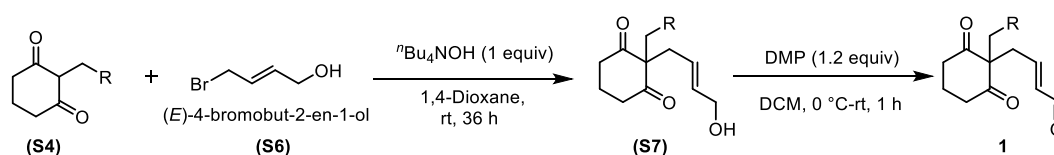

To a solution of 2-methylcyclohexane-1,3-dione (**S4**), (630 mg, 5.0 mmol, 1.0 equiv) and aqueous  $\text{Bu}_4\text{NOH}$  (40% in  $\text{H}_2\text{O}$ , 3.3 mL, 1 equiv) was added a solution of substituent (E)-4-bromobut-2-en-1-ol (6.0 mmol, 1.2 equiv) in dioxane (5 mL). The solution was stirred for 36 h. The solution was neutralized with 10% aqueous HCl. The two liquid layers were separated, and the aqueous layer was extracted with EtOAc. The combined organic layers were washed with brine and dried with  $\text{Na}_2\text{SO}_4$ , and the solvent was evaporated. The residue was purified by column chromatography on silica gel to give the corresponding desired enol-tethered cyclohexane 1,3-dione **S7** product.<sup>3</sup>

To a stirred solution of allyl alcohol **S7** (5.0 mmol) in 25 mL of CH<sub>2</sub>Cl<sub>2</sub> was added Dess Martin Periodinane (3.18 g; 7.5 mmol, 1.5 equiv) in portion wise at 0 °C. The resulting reaction mixture was stirred at room temperature for 1h. Then the reaction mixture was diluted with water (15 mL) and extracted with CH<sub>2</sub>Cl<sub>2</sub> (25 mL × 3). The combined organic solvent was washed with NaHCO<sub>3</sub> (25 mL), dried over anhydrous Na<sub>2</sub>SO<sub>4</sub>, filtered, and concentrated *in vacuo*. The crude reaction mixture was purified by column chromatography (EtOAc/hexane) to give the desired enal-tethered cyclohexane 1,3-diones **1** in good yields and the *Z/E* ratio of all substrates varies from 1:1 to >20:1.<sup>4</sup>

**4-(1-Methyl-2,6-dioxocyclohexyl)but-2-enal (1a):**

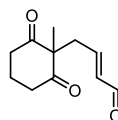

Prepared according to the general procedure as described above in 68% yield (660 mg, *E/Z* = 10:1). It was purified by flash chromatography (40% EtOAc/hexane; *R<sub>f</sub>* = 0.3) to afford a colourless liquid; <sup>1</sup>H NMR (400 MHz, CDCl<sub>3</sub>) δ 9.38 (d, *J* = 7.9 Hz, 1H), 6.61 (dt, *J* = 15.4, 7.7 Hz, 1H), 6.05 (ddd, *J* = 15.6, 7.8, 1.0 Hz, 1H), 2.80 – 2.70 (m, 4H), 2.61 – 2.52 (m, 2H), 2.04 (tt, *J* = 12.0, 5.9 Hz, 1H), 1.81 (dtd, *J* = 19.8, 10.0, 5.0 Hz, 1H), 1.34 (s, 3H); <sup>13</sup>C NMR (101 MHz, CDCl<sub>3</sub>) δ 208.9, 193.7, 152.9, 135.8, 65.0, 37.8, 36.7, 23.3, 17.5; HRMS (ESI) calcd for C<sub>11</sub>H<sub>15</sub>O<sub>3</sub> [M+H]<sup>+</sup>: 195.1015; found: 195.1019.

**4-(2,6-Dioxo-1-propylcyclohexyl)but-2-enal (1d):**

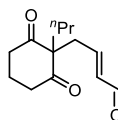

Prepared according to the general procedure as described above in 64% yield (710 mg, *E/Z* = 9:1). It was purified by flash chromatography (40% EtOAc/hexane; *R<sub>f</sub>* = 0.3) to afford a yellow liquid; <sup>1</sup>H NMR (500 MHz, CDCl<sub>3</sub>) δ 9.42 (d, *J* = 7.9 Hz, 1H), 6.62 (dt, *J* = 15.5, 7.3 Hz, 1H), 6.09 (ddt, *J* = 15.6, 7.9, 1.2 Hz, 1H), 2.79 (dd, *J* = 7.3, 1.2 Hz, 2H), 2.77 – 2.70 (m, 2H), 2.57 (dt, *J* = 10.3, 5.4 Hz, 2H), 2.14 – 2.04 (m, 1H), 1.80 – 1.74 (m, 3H), 1.23 – 1.15 (m, 2H), 0.88 (t, *J* = 7.3 Hz, 3H); <sup>13</sup>C NMR (101 MHz, CDCl<sub>3</sub>) δ 208.9, 193.8, 153.5, 135.9, 69.6, 40.1, 38.7, 34.8, 17.9, 17.4, 14.3; HRMS (ESI) calcd for C<sub>13</sub>H<sub>19</sub>O<sub>3</sub> [M+H]<sup>+</sup>: 223.1328; found: 223.1330.

**4-(1-(Cyclohexylmethyl)-2,6-dioxocyclohexyl)but-2-enal (1e):**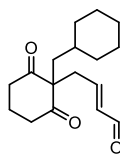

Prepared according to the general procedure as described above in 71% yield (979 mg, *E/Z* = 12:1). It was purified by flash chromatography (40% EtOAc/hexane;  $R_f$  = 0.5) to afford a colourless liquid;  $^1\text{H}$  NMR (400 MHz,  $\text{CDCl}_3$ )  $\delta$  9.39 (d,  $J$  = 7.9 Hz, 1H), 6.58 (dt,  $J$  = 15.6, 7.8 Hz, 1H), 6.07 (ddd,  $J$  = 15.6, 7.8, 1.1 Hz, 1H), 2.83 – 2.74 (m, 4H), 2.54 (dt,  $J$  = 16.2, 5.3 Hz, 2H), 2.14 – 2.04 (m, 1H), 1.83 – 1.75 (m, 1H), 1.73 (d,  $J$  = 5.6 Hz, 2H), 1.62 (d,  $J$  = 14.1 Hz, 2H), 1.52 (d,  $J$  = 12.9 Hz, 2H), 1.36 – 1.25 (m, 1H), 1.23 – 1.03 (m, 4H), 0.93 – 0.82 (m, 2H);  $^{13}\text{C}$  NMR (101 MHz,  $\text{CDCl}_3$ )  $\delta$  209.1, 193.8, 153.5, 135.8, 69.2, 45.5, 38.7, 35.7, 34.7, 34.1, 26.2, 25.9, 17.5; HRMS (ESI) calcd for  $\text{C}_{17}\text{H}_{25}\text{O}_3$   $[\text{M}+\text{H}]^+$ : 277.1798; found: 277.1791.

**4-(1-Allyl-2,6-dioxocyclohexyl)but-2-enal (1f):**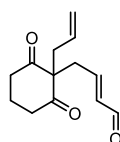

Prepared according to the general procedure as described above in 62% yield (682 mg, *E/Z* = 10:1). It was purified by flash chromatography (40% EtOAc/hexane;  $R_f$  = 0.4) to afford a colourless liquid;  $^1\text{H}$  NMR (400 MHz,  $\text{CDCl}_3$ )  $\delta$  9.36 (d,  $J$  = 7.8 Hz, 1H), 6.56 (dt,  $J$  = 15.6, 7.3 Hz, 1H), 6.03 (ddt,  $J$  = 15.6, 7.9, 1.2 Hz, 1H), 5.50 (ddt,  $J$  = 17.5, 10.2, 7.4 Hz, 1H), 5.12 – 5.02 (m, 2H), 2.73 (dd,  $J$  = 7.3, 1.2 Hz, 2H), 2.66 (ddd,  $J$  = 16.4, 10.7, 5.6 Hz, 2H), 2.56 (dt,  $J$  = 10.8, 5.4 Hz, 2H), 2.50 (d,  $J$  = 7.4 Hz, 2H), 2.10 – 2.00 (m, 1H), 1.81 – 1.69 (m, 1H);  $^{13}\text{C}$  NMR (101 MHz,  $\text{CDCl}_3$ )  $\delta$  208.5, 193.6, 152.9, 135.9, 130.8, 120.5, 68.7, 41.9, 38.8, 35.3, 17.0; HRMS (ESI) calcd for  $\text{C}_{13}\text{H}_{17}\text{O}_3$   $[\text{M}+\text{H}]^+$ : 221.1172; found: 221.1175.

**4-(1-Benzyl-2,6-dioxocyclohexyl)but-2-enal (1g):**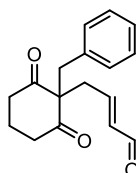

Prepared according to the general procedure as described above in 80% yield (1.08 g, *E/Z* > 20:1). It was purified by flash chromatography (30% EtOAc/hexane;  $R_f$  = 0.5) to afford colourless liquid;  $^1\text{H}$  NMR (500 MHz,  $\text{CDCl}_3$ )  $\delta$  9.38 (d,  $J$  = 7.8 Hz, 1H), 7.26 – 7.20 (m, 3H), 6.97 (dd,  $J$  = 7.4, 2.0 Hz,

2H), 6.51 (dt,  $J = 15.4, 7.6$  Hz, 1H), 6.05 (ddt,  $J = 15.5, 7.7, 1.0$  Hz, 1H), 3.10 (s, 2H), 2.84 (dd,  $J = 7.6, 1.0$  Hz, 2H), 2.41 (ddd,  $J = 17.1, 7.1, 4.7$  Hz, 2H), 2.21 (ddd,  $J = 17.1, 9.7, 5.2$  Hz, 2H), 1.58 (ddq,  $J = 19.1, 9.6, 4.7$  Hz, 1H), 1.41 (dtt,  $J = 14.1, 7.1, 5.2$  Hz, 1H);  $^{13}\text{C}$  NMR (126 MHz,  $\text{CDCl}_3$ )  $\delta$  210.5, 193.4, 151.6, 136.1, 135.2, 129.9, 128.8, 127.7, 69.0, 45.4, 40.5, 38.6, 15.9; HRMS (ESI) calcd for  $\text{C}_{17}\text{H}_{19}\text{O}_3$   $[\text{M}+\text{H}]^+$ : 271.1328; found: 271.1324.

**4-(1-(4-Methylbenzyl)-2,6-dioxocyclohexyl)but-2-enal (1h):**

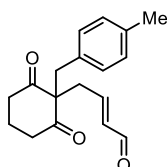

Prepared according to the general procedure as described above in 72% yield (1.02 g,  $E/Z = 2:1$ ). It was purified by flash chromatography (40% EtOAc/hexane;  $R_f = 0.4$ ) to afford a yellow liquid;  $^1\text{H}$  NMR (500 MHz,  $\text{CDCl}_3$ ) for mixture of isomers:  $\delta$  9.96 (d,  $J = 7.9$  Hz, 0.3H), 9.35 (d,  $J = 7.8$  Hz, 0.7H), 7.02 (d,  $J = 7.1$  Hz, 2H), 6.84 (d,  $J = 7.9$  Hz, 2H), 6.50 (dt,  $J = 15.4, 7.6$  Hz, 0.7H), 6.21 (dt,  $J = 10.7, 8.6$  Hz, 0.3H), 6.02 (ddd,  $J = 15.5, 7.8, 0.7$  Hz, 0.7H), 5.89 – 5.84 (m, 0.3H), 3.09 (d,  $J = 8.5$  Hz, 0.6H), 3.05 (d,  $J = 9.5$  Hz, 2 H), 2.81 (d,  $J = 7.5$  Hz, 1.4H), 2.45 – 2.34 (m, 2H), 2.26 (s, 3H), 2.25 – 2.14 (m, 2H), 1.62 – 1.51 (m, 1H), 1.50 – 1.38 (m, 1H);  $^{13}\text{C}$  NMR (126 MHz,  $\text{CDCl}_3$ )  $\delta$  210.9, 210.5, 193.5, 191.2, 151.9, 145.3, 137.4, 136.0, 132.3, 131.9, 129.7, 129.7, 129.5, 129.5, 69.2, 69.1, 45.6, 45.2, 40.6, 40.4, 38.3, 34.1, 21.1, 16.0, 15.8; HRMS (ESI) calcd for  $\text{C}_{18}\text{H}_{21}\text{O}_3$   $[\text{M}+\text{H}]^+$ : 285.1485; found: 285.1481.

**4-(1-(4-Fluorobenzyl)-2,6-dioxocyclohexyl)but-2-enal (1i):**

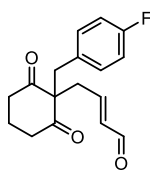

Prepared according to the general procedure as described above in 70% yield (1.0 g,  $E/Z \Rightarrow 20:1$ ). It was purified by flash chromatography (20% EtOAc/hexane;  $R_f = 0.4$ ) to afford a colourless liquid;  $^1\text{H}$  NMR (400 MHz,  $\text{CDCl}_3$ )  $\delta$  9.39 (d,  $J = 7.7$  Hz, 1H), 6.97 – 6.90 (m, 4H), 6.50 (dt,  $J = 15.4, 7.6$  Hz, 1H), 6.05 (ddt,  $J = 15.6, 7.7, 1.2$  Hz, 1H), 3.08 (s, 2H), 2.81 (dd,  $J = 7.6, 1.2$  Hz, 2H), 2.43 (ddd,  $J = 17.1, 7.4, 4.8$  Hz, 2H), 2.23 (ddd,  $J = 17.2, 9.3, 5.2$  Hz, 2H), 1.63 (ddq,  $J = 18.9, 9.5, 4.8$  Hz, 1H), 1.43 (dtt,  $J = 10.4, 7.4, 5.2$  Hz, 1H);  $^{13}\text{C}$  NMR (101 MHz,  $\text{CDCl}_3$ )  $\delta$  210.4, 193.3, 162.3 (d,  $J_{\text{CF}} = 250.82$  Hz), 151.1, 136.2, 131.6 (d,  $J_{\text{CF}} = 7.87$  Hz), 131.1 (d,  $J_{\text{CF}} = 3.54$  Hz), 115.7 (d,  $J_{\text{CF}} = 21.40$  Hz), 68.9,

43.9, 40.4, 38.9, 15.9;  $^{19}\text{F}$  NMR (471 MHz,  $\text{CDCl}_3$ )  $\delta$  -112.10. HRMS (ESI) calcd for  $\text{C}_{17}\text{H}_{18}\text{O}_3\text{F}$   $[\text{M}+\text{H}]^+$ : 289.1234; found: 289.1229.

**4-(1-(4-Chlorobenzyl)-2,6-dioxocyclohexyl)but-2-enal (1j):**

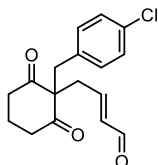

Prepared according to the general procedure as described above in 73% yield (1.1 g,  $E/Z > 20:1$ ). It was purified by flash chromatography (30% EtOAc/hexane;  $R_f = 0.4$ ) to afford a colourless liquid;  $^1\text{H}$  NMR (400 MHz,  $\text{CDCl}_3$ )  $\delta$  9.42 (d,  $J = 7.7$  Hz, 1H), 7.22 (d,  $J = 8.4$  Hz, 2H), 6.93 (d,  $J = 8.4$  Hz, 2H), 6.52 (dt,  $J = 15.4, 7.6$  Hz, 1H), 6.07 (ddd,  $J = 15.6, 7.7, 1.0$  Hz, 1H), 3.09 (s, 2H), 2.82 (dd,  $J = 7.6, 1.0$  Hz, 2H), 2.45 (ddd,  $J = 17.1, 7.4, 4.8$  Hz, 2H), 2.24 (ddd,  $J = 17.2, 9.3, 5.2$  Hz, 2H), 1.65 (ddq,  $J = 18.9, 9.4, 4.8$  Hz, 1H), 1.46 (dt,  $J = 10.5, 7.4, 5.2$  Hz, 1H);  $^{13}\text{C}$  NMR (101 MHz,  $\text{CDCl}_3$ )  $\delta$  210.3, 193.2, 150.9, 136.3, 133.9, 133.7, 131.4, 129.0, 68.8, 44.0, 40.5, 39.0, 16.0; HRMS (ESI) calcd for  $\text{C}_{17}\text{H}_{18}\text{O}_3\text{Cl}$   $[\text{M}+\text{H}]^+$ : 305.0939; found: 305.0951.

**4-(1-(4-Bromobenzyl)-2,6-dioxocyclohexyl)but-2-enal (1k):**

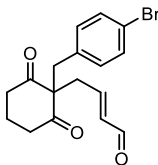

Prepared according to the general procedure as described above in 76% yield (1.1 g,  $E/Z = 4:1$ ). It was purified by flash chromatography (30% EtOAc/hexane;  $R_f = 0.5$ ) to afford a colourless liquid;  $^1\text{H}$  NMR (400 MHz,  $\text{CDCl}_3$ )  $\delta$  9.95 (d,  $J = 7.8$  Hz, 0.2H), 9.39 (d,  $J = 7.7$  Hz, 0.8H), 7.35 (d,  $J = 8.4$  Hz, 2H), 6.85 (d,  $J = 8.3$  Hz, 2H), 6.50 (dt,  $J = 15.2, 7.6$  Hz, 0.8H), 6.22 (dt,  $J = 11.2, 8.1$  Hz, 0.2H), 6.04 (ddd,  $J = 16.6, 8.2, 1.7$  Hz, 0.8H), 5.91 (ddd,  $J = 11.2, 7.8, 1.3$  Hz, 0.2H), 3.12 – 3.00 (m, 2.2H), 2.79 (d,  $J = 7.6$  Hz, 1.8H), 2.43 (ddt,  $J = 14.7, 12.2, 6.1$  Hz, 2H), 2.28 – 2.18 (m, 2H), 1.64 (ddq,  $J = 18.7, 9.3, 4.6$  Hz, 1H), 1.50 – 1.38 (m, 1H);  $^{13}\text{C}$  NMR (101 MHz,  $\text{CDCl}_3$ )  $\delta$  210.5, 210.1, 193.2, 190.9, 150.9, 144.5, 136.2, 134.3, 132.5, 131.9, 131.8, 131.6, 131.6, 121.7, 68.6, 68.6, 44.3, 43.7, 40.6, 40.3, 38.9, 34.6, 15.9, 15.8; HRMS (ESI) calcd for  $\text{C}_{17}\text{H}_{18}\text{O}_3\text{Br}$   $[\text{M}+\text{H}]^+$ : 349.0433; found: 349.0438.

**4-(1-([1,1'-Biphenyl]-4-ylmethyl)-2,6-dioxocyclohexyl)but-2-enal (1l):**

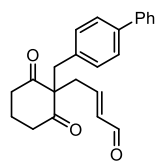

Prepared according to the general procedure as described above in 65% yield (1.1 g, *E/Z* = >20:1). It was purified by flash chromatography (40% EtOAc/hexane; *R<sub>f</sub>* = 0.4 to afford a colourless liquid; <sup>1</sup>H NMR (400 MHz, CDCl<sub>3</sub>) δ 9.40 (d, *J* = 7.8 Hz, 1H), 7.55 (dd, *J* = 8.3, 1.2 Hz, 2H), 7.49 (d, *J* = 8.3 Hz, 2H), 7.41 (t, *J* = 7.5 Hz, 2H), 7.35 – 7.30 (m, 1H), 7.06 (d, *J* = 8.3 Hz, 2H), 6.54 (dt, *J* = 15.4, 7.6 Hz, 1H), 6.07 (ddt, *J* = 15.6, 7.8, 0.9 Hz, 1H), 3.15 (s, 2H), 2.87 (dd, *J* = 7.6, 1.0 Hz, 2H), 2.45 (ddd, *J* = 17.0, 7.0, 4.8 Hz, 2H), 2.29 (ddd, *J* = 17.0, 9.6, 5.3 Hz, 2H), 1.61 (ddq, *J* = 19.1, 9.6, 4.8 Hz, 1H), 1.49 (dt, *J* = 14.1, 7.0, 5.3 Hz, 1H); <sup>13</sup>C NMR (101 MHz, CDCl<sub>3</sub>) δ 210.4, 193.3, 151.6, 140.3, 140.2, 136.1, 134.2, 130.3, 128.9, 127.5, 127.3, 126.9, 69.0, 44.8, 40.4, 38.5, 16.0; HRMS (ESI) calcd for C<sub>23</sub>H<sub>23</sub>O<sub>3</sub> [M+H]<sup>+</sup>: 347.1641; found: 347.1645.

**4-(1-(4-Nitrobenzyl)-2,6-dioxocyclohexyl)but-2-enal (1m):**

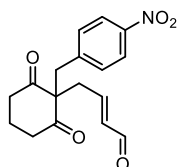

Prepared according to the general procedure as described above in 56% yield (882mg, *E/Z* = >20:1). It was purified by flash chromatography (50% EtOAc/hexane; *R<sub>f</sub>* = 0.4) to afford a yellow liquid; <sup>1</sup>H NMR (400 MHz, CDCl<sub>3</sub>) δ 9.43 (d, *J* = 7.7 Hz, 1H), 8.07 (dd, *J* = 8.7, 1.8 Hz, 2H), 7.17 (d, *J* = 7.3 Hz, 2H), 6.52 (dt, *J* = 15.5, 7.6 Hz, 1H), 6.06 (dddd, *J* = 15.6, 7.7, 2.4, 1.3 Hz, 1H), 3.21 (s, 2H), 2.80 (d, *J* = 7.6 Hz, 2H), 2.50 (ddd, *J* = 17.1, 8.0, 5.0 Hz, 2H), 2.29 (ddd, *J* = 17.2, 8.6, 5.1 Hz, 2H), 1.82 – 1.68 (m, 1H), 1.45 (dt, *J* = 13.3, 8.2, 5.1 Hz, 1H); <sup>13</sup>C NMR (101 MHz, CDCl<sub>3</sub>) δ 209.5, 193.0, 149.9, 147.3, 143.3, 136.5, 131.1, 123.8, 68.6, 42.5, 40.1, 39.5, 16.0; HRMS (ESI) calcd for C<sub>17</sub>H<sub>16</sub>O<sub>5</sub>N [M-H]<sup>+</sup>: 314.1023; found: 314.1038.

**4-(1-(3-Methoxybenzyl)-2,6-dioxocyclohexyl)but-2-enal (1n):**

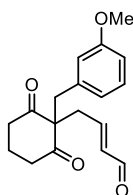

Prepared according to the general procedure as described above in 48% yield (806 mg, *E/Z* = 8:1). It was purified by flash chromatography (40% EtOAc/hexane; *R<sub>f</sub>* = 0.4) to afford a colourless liquid; <sup>1</sup>H NMR (500 MHz, CDCl<sub>3</sub>) δ 9.96 (d, *J* = 7.9 Hz, 1H), 7.14 (t, *J* = 8.0 Hz, 1H), 6.74 (ddd, *J* = 8.3, 2.5, 0.7 Hz, 1H), 6.54 (d, *J* = 7.6 Hz, 1H), 6.50 (t, *J* = 6.5 Hz, 1H), 6.21 (dt, *J* = 11.2, 8.5 Hz, 1H), 5.88 (ddt, *J* = 10.6, 8.2, 1.3 Hz, 1H), 3.72 (s, 3H), 3.11 (dd, *J* = 8.5, 1.1 Hz, 2H), 3.07 (s, 2H), 2.38 (ddd, *J* = 17.2, 7.1, 4.6 Hz, 2H), 2.18 (ddd, *J* = 17.1, 9.7, 5.2 Hz, 2H), 1.57 (dt, *J* = 14.3, 9.5, 4.6 Hz, 1H),

1.40 (qdd,  $J = 11.6, 6.1, 3.4$  Hz, 1H);  $^{13}\text{C}$  NMR (101 MHz,  $\text{CDCl}_3$ )  $\delta$  210.9, 191.1, 159.8, 145.0, 136.7, 132.4, 129.9, 122.1, 115.5, 113.1, 68.8, 55.3, 45.9, 40.74, 3.48, 15.7; HRMS (ESI) calcd for  $\text{C}_{18}\text{H}_{21}\text{O}_4$   $[\text{M}+\text{H}]^+$ : 301.1434; found: 301.1428.

**4-(1-(3-Fluorobenzyl)-2,6-dioxocyclohexyl)but-2-enal (1o):**

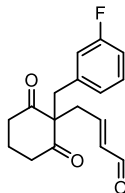

Prepared according to the general procedure as described above in 59% yield (993 mg,  $E/Z = 20:1$ ). It was purified by flash chromatography (40% EtOAc/hexane;  $R_f = 0.4$ ) to afford a yellow liquid;  $^1\text{H}$  NMR (400 MHz,  $\text{CDCl}_3$ )  $\delta$  9.43 (d,  $J = 7.7$  Hz, 1H), 7.26 – 7.20 (m, 1H), 6.94 (tdd,  $J = 8.5, 2.6, 0.7$  Hz, 1H), 6.78 (d,  $J = 7.7$  Hz, 1H), 6.74 – 6.70 (dt,  $J = 9.6, 1.9$  Hz, 1H), 6.52 (dt,  $J = 15.4, 7.6$  Hz, 1H), 6.08 (ddt,  $J = 15.6, 7.7, 1.1$  Hz, 1H), 3.11 (s, 2H), 2.84 (dd,  $J = 7.6, 1.1$  Hz, 2H), 2.45 (ddd,  $J = 17.2, 7.5, 4.8$  Hz, 2H), 2.26 (ddd,  $J = 17.2, 9.2, 5.2$  Hz, 2H), 1.66 (dtt,  $J = 14.1, 9.4, 4.8$  Hz, 1H), 1.45 (dtt,  $J = 14.2, 7.5, 5.2$  Hz, 1H);  $^{13}\text{C}$  NMR (101 MHz,  $\text{CDCl}_3$ )  $\delta$  210.2, 193.3, 162.8 (d,  $J_{\text{CF}} = 246.19$  Hz), 150.9, 137.7 (d,  $J_{\text{CF}} = 6.96$  Hz), 136.4, 130.4 (d,  $J_{\text{CF}} = 8.27$  Hz), 125.76 (d,  $J_{\text{CF}} = 2.4$  Hz), 117.0 (d,  $J_{\text{CF}} = 21.35$  Hz), 114.7 (d,  $J_{\text{CF}} = 20.65$  Hz), 68.7, 44.3, 40.5, 39.2, 16.0.  $^{19}\text{F}$  NMR (471 MHz,  $\text{CDCl}_3$ )  $\delta$  -112.1; HRMS (ESI) calcd for  $\text{C}_{17}\text{H}_{18}\text{FO}_3$   $[\text{M}+\text{H}]^+$ : 289.1234; found: 289.1229.

**4-(1-(3-Chlorobenzyl)-2,6-dioxocyclohexyl)but-2-enal (1p):**

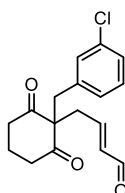

Prepared according to the general procedure as described above in 68% yield (1.0 g,  $E/Z \geq 20:1$ ). It was purified by flash chromatography (40% EtOAc/hexane;  $R_f = 0.4$ ) to afford a colourless liquid;  $^1\text{H}$  NMR (400 MHz,  $\text{CDCl}_3$ )  $\delta$  9.33 (d,  $J = 7.8$  Hz, 1H), 7.16 – 7.09 (m, 2H), 6.91 (s, 1H), 6.81 (dd,  $J = 5.0, 1.6$  Hz, 1H), 6.46 (dt,  $J = 15.4, 7.6$  Hz, 1H), 5.98 (ddd,  $J = 15.6, 7.8, 1.1$  Hz, 1H), 3.01 (s, 2H), 2.75 (d,  $J = 7.6$  Hz, 2H), 2.40 (ddd,  $J = 16.9, 7.2, 5.0$  Hz, 2H), 2.23 (ddd,  $J = 17.1, 9.2, 5.2$  Hz, 2H), 1.60 (ddt,  $J = 18.8, 9.4, 4.6$  Hz, 1H), 1.42 (tdd,  $J = 12.7, 7.3, 5.3$  Hz, 1H);  $^{13}\text{C}$  NMR (101 MHz,  $\text{CDCl}_3$ )  $\delta$  209.8, 193.1, 150.9, 137.3, 136.1, 134.3, 129.9, 129.8, 128.1, 127.7, 68.5, 43.6, 40.1, 38.7, 15.9; HRMS (ESI) calcd for  $\text{C}_{17}\text{H}_{18}\text{O}_3\text{Cl}$   $[\text{M}+\text{H}]^+$ : 305.0939; found: 305.0932.

**4-(1-(3-Bromobenzyl)-2,6-dioxocyclohexyl)but-2-enal (1q):**

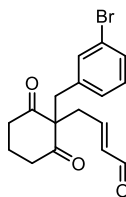

Prepared according to the general procedure as described above in 74% yield (1.2 g,  $E/Z = >20:1$ ). It was purified by flash chromatography (40% EtOAc/hexane;  $R_f = 0.5$ ) to afford a colourless liquid;  $^1\text{H}$  NMR (400 MHz,  $\text{CDCl}_3$ )  $\delta$  9.42 (d,  $J = 7.7$  Hz, 1H), 7.37 (ddd,  $J = 8.0, 1.9, 1.0$  Hz, 1H), 7.17 – 7.14 (m, 1H), 7.12 (d,  $J = 7.9$  Hz, 1H), 6.92 (dt,  $J = 7.9, 1.4$  Hz, 1H), 6.52 (dt,  $J = 15.4, 7.6$  Hz, 1H), 6.07 (ddt,  $J = 15.6, 7.7, 1.2$  Hz, 1H), 3.07 (s, 2H), 2.83 (dd,  $J = 7.6, 1.2$  Hz, 2H), 2.46 (ddd,  $J = 17.2, 7.5, 4.8$  Hz, 2H), 2.26 (ddd,  $J = 17.2, 9.3, 5.2$  Hz, 2H), 1.66 (dtt,  $J = 14.1, 9.5, 4.8$  Hz, 1H), 1.47 (dtt,  $J = 14.2, 7.5, 5.2$  Hz, 1H);  $^{13}\text{C}$  NMR (101 MHz,  $\text{CDCl}_3$ )  $\delta$  210.1, 193.3, 150.9, 137.7, 136.4, 132.9, 130.9, 130.4, 128.7, 122.9, 68.7, 44.1, 40.5, 39.1, 16.0; HRMS (ESI) calcd for  $\text{C}_{17}\text{H}_{18}\text{O}_3\text{Br}[\text{M}+\text{H}]^+$ : 349.0433; found: 349.0428.

**4-(1-(3-Nitrobenzyl)-2,6-dioxocyclohexyl)but-2-enal (1r):**

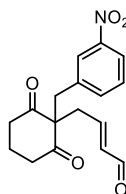

Prepared according to the general procedure as described above in 52% yield (819 mg,  $E/Z = 20:1$ ). It was purified by flash chromatography (50% EtOAc/hexane;  $R_f = 0.3$ ) to afford a yellow liquid;  $^1\text{H}$  NMR (400 MHz,  $\text{CDCl}_3$ )  $\delta$  9.42 (d,  $J = 7.7$  Hz, 1H), 8.06 (ddd,  $J = 8.2, 2.1, 1.0$  Hz, 1H), 7.85 (t,  $J = 1.8$  Hz, 1H), 7.43 (t,  $J = 7.9$  Hz, 1H), 7.34 (d,  $J = 7.7$  Hz, 1H), 6.53 (dt,  $J = 15.3, 7.6$  Hz, 1H), 6.06 (dd,  $J = 15.6, 7.7$  Hz, 1H), 3.22 (s, 2H), 2.80 (d,  $J = 7.6$  Hz, 2H), 2.53 (ddd,  $J = 17.1, 8.1, 5.0$  Hz, 2H), 2.36 (ddd,  $J = 17.1, 8.6, 5.1$  Hz, 2H), 1.76 (tdd,  $J = 13.6, 8.7, 5.0$  Hz, 1H), 1.51 (dtt,  $J = 18.6, 8.1, 5.1$  Hz, 1H);  $^{13}\text{C}$  NMR (101 MHz,  $\text{CDCl}_3$ )  $\delta$  209.3, 193.1, 150.0, 148.4, 137.7, 136.6, 136.4, 129.7, 124.9, 122.7, 68.7, 42.2, 40.0, 39.1, 16.2; HRMS (ESI) calcd for  $\text{C}_{17}\text{H}_{16}\text{O}_5\text{N}[\text{M}-\text{H}]^-$ : 314.1023; found: 314.1030.

**4-(1-(2-Chlorobenzyl)-2,6-dioxocyclohexyl)but-2-enal (1s):**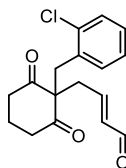

Prepared according to the general procedure as described above in 66% yield (1.0 mg, *E/Z* = >20:1). It was purified by flash chromatography (30% EtOAc/hexane; *R<sub>f</sub>* = 0.4) to afford a colourless liquid; <sup>1</sup>H NMR (500 MHz, CDCl<sub>3</sub>) δ 9.37 (d, *J* = 7.8 Hz, 1H), 7.37 (dd, *J* = 7.4, 1.9 Hz, 1H), 7.25 – 7.18 (m, 2H), 7.06 (dd, *J* = 7.1, 2.2 Hz, 1H), 6.47 (dt, *J* = 15.5, 7.4 Hz, 1H), 6.06 (ddt, *J* = 15.6, 7.8, 1.2 Hz, 1H), 3.27 (s, 2H), 2.90 (dd, *J* = 7.4, 1.2 Hz, 2H), 2.61 – 2.49 (m, 4H), 1.94 – 1.85 (m, 1H), 1.73 – 1.63 (m, 1H); <sup>13</sup>C NMR (101 MHz, CDCl<sub>3</sub>) δ 209.1, 193.6, 152.4, 136.4, 135.0, 132.8, 132.5, 130.2, 129.4, 127.1, 68.9, 41.6, 40.0, 36.5, 16.7; HRMS (ESI) calcd for C<sub>17</sub>H<sub>18</sub>O<sub>3</sub>Cl [M+H]<sup>+</sup>: 305.0952; found: 305.0939.

**4-(1-(2-bromobenzyl)-2,6-dioxocyclohexyl)but-2-enal (1t):**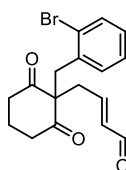

Prepared according to the general procedure as described above in 69% yield (1.2 g, *E/Z* = >20:1). It was purified by flash chromatography (30% EtOAc/hexane; *R<sub>f</sub>* = 0.5) to afford a colourless liquid; <sup>1</sup>H NMR (500 MHz, CDCl<sub>3</sub>) δ 9.32 (d, *J* = 7.8 Hz, 1H), 7.51 (dd, *J* = 8.0, 1.2 Hz, 1H), 7.20 (td, *J* = 7.5, 1.3 Hz, 1H), 7.09 (td, *J* = 7.7, 1.7 Hz, 1H), 7.01 (dd, *J* = 7.7, 1.7 Hz, 1H), 6.44 (dt, *J* = 15.5, 7.4 Hz, 1H), 6.00 (dd, *J* = 15.7, 7.8 Hz, 1H), 3.27 (s, 2H), 2.86 (dd, *J* = 7.4, 1.0 Hz, 2H), 2.60 – 2.47 (m, 4H), 1.91 – 1.82 (m, 1H), 1.66 (tdd, *J* = 15.0, 10.0, 5.3 Hz, 1H); <sup>13</sup>C NMR (126 MHz, CDCl<sub>3</sub>) δ 208.9, 193.5, 152.4, 136.2, 134.5, 133.5, 132.1, 129.4, 127.6, 125.6, 68.9, 43.4, 39.9, 36.3, 16.6; HRMS (ESI) calcd for C<sub>17</sub>H<sub>18</sub>O<sub>3</sub>Br [M+H]<sup>+</sup>: 349.0438; found: 349.0438.

**4-(1-(3,4-Dimethoxybenzyl)-2,6-dioxocyclohexyl)but-2-enal (1u):**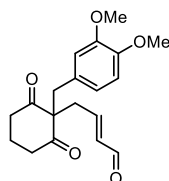

Prepared according to the general procedure as described above in 58% yield (957 mg, *E/Z* = >20:1). It was purified by flash chromatography (20% EtOAc/hexane; *R<sub>f</sub>* = 0.3) to afford a colourless liquid; <sup>1</sup>H

NMR (400 MHz, CDCl<sub>3</sub>)  $\delta$  9.96 (d,  $J$  = 7.9 Hz, 1H), 6.71 (d,  $J$  = 8.2 Hz, 1H), 6.51 (dd,  $J$  = 8.2, 2.1 Hz, 1H), 6.47 (d,  $J$  = 2.0 Hz, 1H), 6.21 (dt,  $J$  = 11.2, 8.5 Hz, 1H), 5.88 (ddt,  $J$  = 11.1, 8.0, 1.2 Hz, 1H), 3.80 (s, 3H), 3.78 (s, 3H), 3.10 (dd,  $J$  = 8.5, 1.1 Hz, 2H), 3.06 (s, 2H), 2.37 (ddd,  $J$  = 17.2, 7.2, 4.6 Hz, 2H), 2.14 (ddd,  $J$  = 17.2, 9.6, 5.1 Hz, 2H), 1.56 (ddq,  $J$  = 18.9, 9.4, 4.6 Hz, 1H), 1.36 (dt,  $J$  = 10.3, 7.2, 5.1 Hz, 1H); <sup>13</sup>C NMR (75 MHz, CDCl<sub>3</sub>)  $\delta$  211.4, 191.1, 148.9, 148.4, 144.9, 132.4, 127.6, 122.0, 112.8, 111.2, 68.9, 56.0, 55.9, 45.8, 40.9, 34.7, 15.7; HRMS (ESI) calcd for C<sub>19</sub>H<sub>23</sub>O<sub>5</sub> [M+H]<sup>+</sup>: 331.1540; found: 331.1531.

**4-(1-(2,3-Dichlorobenzyl)-2,6-dioxocyclohexyl)but-2-enal (1v):**

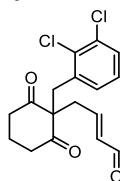

Prepared according to the general procedure as described above in 54% yield (912 mg, E/Z = 20:1). It was purified by flash chromatography (20% EtOAc/hexane;  $R_f$  = 0.3) to afford a colourless liquid; <sup>1</sup>H NMR (400 MHz, CDCl<sub>3</sub>)  $\delta$  10.02 (d,  $J$  = 7.8 Hz, 1H), 7.40 (dd,  $J$  = 8.0, 1.4 Hz, 1H), 7.14 (t,  $J$  = 7.9 Hz, 1H), 6.98 (dd,  $J$  = 7.7, 1.4 Hz, 1H), 6.16 (dt,  $J$  = 11.2, 8.2 Hz, 1H), 5.87 (dd,  $J$  = 11.2, 7.9 Hz, 1H), 3.32 (s, 2H), 3.15 (d,  $J$  = 8.2 Hz, 2H), 2.56 – 2.52 (m, 4H), 1.95 – 1.83 (m, 1H), 1.72 (td,  $J$  = 14.7, 7.9 Hz, 1H); <sup>13</sup>C NMR (101 MHz, CDCl<sub>3</sub>)  $\delta$  208.8, 193.5, 151.9, 136.4, 135.2, 134.0, 133.4, 130.4, 130.1, 127.3, 68.6, 41.8, 39.9, 36.6, 16.6; HRMS (ESI) calcd for C<sub>17</sub>H<sub>17</sub>O<sub>3</sub>Cl<sub>2</sub> [M+H]<sup>+</sup>: 339.0549; found: 339.0557.

**4-(1-(Naphthalen-1-ylmethyl)-2,6-dioxocyclohexyl)but-2-enal (1w):**

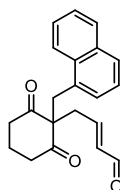

Prepared according to the general procedure as described above in 60% yield (960 mg, E/Z = 20:1). It was purified by flash chromatography (20% EtOAc/hexane;  $R_f$  = 0.2) to afford a colourless liquid; <sup>1</sup>H NMR (500 MHz, CDCl<sub>3</sub>)  $\delta$  9.37 (d,  $J$  = 7.8 Hz, 1H), 7.87 (d,  $J$  = 8.5 Hz, 1H), 7.82 (dd,  $J$  = 8.2, 0.9 Hz, 1H), 7.76 (d,  $J$  = 8.2 Hz, 1H), 7.53 – 7.44 (m, 2H), 7.36 (d,  $J$  = 8.0, 7.2 Hz, 1H), 7.16 (d,  $J$  = 6.5 Hz, 1H), 6.49 (dt,  $J$  = 15.4, 7.6 Hz, 1H), 6.07 (dd,  $J$  = 15.6, 7.8 Hz, 1H), 3.59 (s, 2H), 3.03 (dd,  $J$  = 7.6, 0.9 Hz, 2H), 2.30 (ddd,  $J$  = 17.0, 6.4, 4.5 Hz, 2H), 1.83 (ddd,  $J$  = 21.8, 10.4, 5.2 Hz, 2H), 1.45 – 1.35 (m, 1H), 1.28 – 1.18 (m, 1H); <sup>13</sup>C NMR (126 MHz, CDCl<sub>3</sub>)  $\delta$  211.0, 193.5, 151.9, 136.3, 133.9, 131.9, 131.7, 128.9, 128.8, 128.7, 126.7, 126.1, 125.3, 123.8, 69.1, 42.3, 40.7, 38.8, 15.7; HRMS (ESI) calcd for C<sub>21</sub>H<sub>24</sub>O<sub>3</sub>N [M+NH<sub>4</sub>]<sup>+</sup>: 338.1750; found: 338.1754.

**4-(2,6-dioxo-1-(Thiophen-2-ylmethyl)cyclohexyl)but-2-enal (1x):**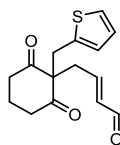

Prepared according to the general procedure as described above in 63% yield (869 mg, E/Z =20:1). It was purified by flash chromatography (20% EtOAc/hexane;  $R_f$  = 0.3) to afford a orange liquid;  $^1\text{H}$  NMR (400 MHz,  $\text{CDCl}_3$ )  $\delta$  9.39 (d,  $J$  = 7.7 Hz, 1H), 7.09 (d,  $J$  = 5.1 Hz, 1H), 6.85 (t,  $J$  = 4.3 Hz, 1H), 6.67 (d,  $J$  = 3.3 Hz, 1H), 6.53 (dt,  $J$  = 15.5, 7.6 Hz, 1H), 6.04 (ddd,  $J$  = 15.6, 7.7, 0.8 Hz, 1H), 3.31 (s, 2H), 2.78 (d,  $J$  = 7.6 Hz, 2H), 2.50 – 2.33 (m, 4H), 1.76 – 1.64 (m, 1H), 1.56 – 1.44 (m, 1H);  $^{13}\text{C}$  NMR (101 MHz,  $\text{CDCl}_3$ )  $\delta$  209.9, 193.2, 150.8, 136.8, 136.1, 127.9, 127.1, 125.2, 68.8, 40.1, 38.9, 37.5, 16.0; HRMS (ESI) calcd for  $\text{C}_{15}\text{H}_{17}\text{O}_3\text{S}$   $[\text{M}+\text{H}]^+$ : 277.0892; found: 277.0906.

**4-(1-(Furan-2-ylmethyl)-2,6-dioxocyclohexyl)but-2-enal (1y):**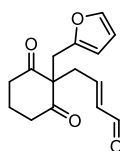

Prepared according to the general procedure as described above in 55% yield (791 mg, E/Z =17:1). It was purified by flash chromatography (20% EtOAc/hexane;  $R_f$  = 0.3) to afford a orange liquid;  $^1\text{H}$  NMR (400 MHz,  $\text{CDCl}_3$ )  $\delta$  9.38 (d,  $J$  = 7.8 Hz, 1H), 7.25 (dd,  $J$  = 1.9, 0.8 Hz, 1H), 6.55 (dt,  $J$  = 15.4, 7.7 Hz, 1H), 6.24 (dd,  $J$  = 3.2, 1.9 Hz, 1H), 6.08 – 5.99 (m, 2H), 3.13 (s, 2H), 2.79 (dd,  $J$  = 7.5, 1.2 Hz, 2H), 2.55 – 2.44 (m, 4H), 1.71 (qd,  $J$  = 6.9, 1.5 Hz, 2H);  $^{13}\text{C}$  NMR (101 MHz,  $\text{CDCl}_3$ )  $\delta$  209.2, 193.4, 151.6, 149.4, 142.2, 136.1, 110.8, 108.9, 67.4, 39.4, 37.6, 36.5, 16.5; HRMS (ESI) calcd for  $\text{C}_{15}\text{H}_{17}\text{O}_4$   $[\text{M}+\text{H}]^+$ : 261.1121; found: 261.1125.

**4-(1-methyl-2,5-dioxocyclopentyl)but-2-enal (1z):**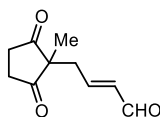

Prepared according to the general procedure as described above in 50% yield (450 mg, E/Z =17:1). It was purified by flash chromatography (60% EtOAc/hexane;  $R_f$  = 0.3) to afford a orange liquid;  $^1\text{H}$  NMR (400 MHz,  $\text{CDCl}_3$ )  $\delta$  = 9.38 (d,  $J$  = 7.8, 1H), 6.62 (dd,  $J$  = 15.4, 7.7, 1H), 6.01 (ddt,  $J$  = 15.6, 7.8, 1.3, 1H), 2.88 – 2.80 (m, 2H), 2.72 – 2.63 (m, 2H), 2.53 (dd,  $J$  = 7.6, 1.3, 2H), 1.13 (s, 3H).  $^{13}\text{C}$  NMR (151 MHz,  $\text{CDCl}_3$ )  $\delta$  214.7, 193.3, 150.5, 136.2, 56.0, 36.3, 35.0, 19.9. HRMS (ESI) calcd for  $\text{C}_{10}\text{H}_{13}\text{O}_3$   $[\text{M}+\text{H}]^+$ : 181.0865; found: 181.0870.

### III. References:

1. (a) D. B. Ramachary, M. Kishor, *Org. Biomol. Chem.*, 2008, **6**, 4176.
2. X.-W. Li, A. Ear, L. Roger, Dr. N. Riache, A. Deville, B. Nay. *Chem. Eur. J.* 2013,**19**, 16389 – 16393.
3. C. Zhu, D. Wang, Y. Zhao, W. Sun, and Z. Shi, *J. Am. Chem. Soc.* 2017, **139**, 16486.
4. S. B. Thopate, L. R. Magham, S. Dinda, R. Chegondi, *Org. Lett.* **2023**, 25, 1072.

## IV. X-Ray crystallographic data

### X-ray crystallographic data for compound 9:

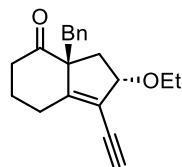

The purified compound **9** was dissolved in a mixed solvent of dichloromethane/*n*-hexane (1:3), and placed in a dark cabinet for slowly evaporation. Colorless crystals were collected after few days for X-ray analysis.

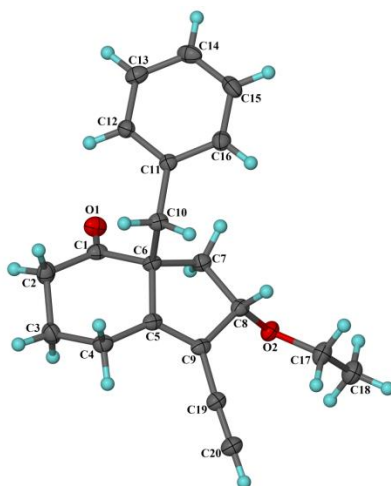

**Figure caption:** ORTEP diagram of compound **9** (KB690) compound with the atom-numbering. Displacement ellipsoids are drawn at the 50% probability level and H atoms are shown as small spheres of arbitrary radius.

**Crystal data for compound 9:** C<sub>20</sub>H<sub>22</sub>O<sub>2</sub>, *M* = 294.37, Monoclinic, space group *P*2<sub>1</sub>(No.4), *a* = 8.546(4) Å, *b* = 6.518(3) Å, *c* = 15.600(8) Å,  $\alpha$  = 90°,  $\beta$  = 105.428(9)°,  $\gamma$  = 90°, *V* = 837.6(7) Å<sup>3</sup>, *Z* = 2, *D*<sub>c</sub> = 1.167 g/cm<sup>3</sup>, *F*<sub>000</sub> = 316, Bruker D8 QUEST PHOTON-III C7 HPAD detector, Mo-K $\alpha$  radiation,  $\lambda$  = 0.71073 Å, *T* = 100(2) K, 2 $\theta$ <sub>max</sub> = 60°,  $\mu$  = 0.074 mm<sup>-1</sup>, 17575 reflections collected, 5101 unique (*R*<sub>int</sub> = 0.0555), 200 parameters, *R*1 = 0.0440, *wR*2 = 0.0899, *R* indices based on 3824 reflections with *I* > 2 $\sigma$ (*I*) (refinement on *F*<sup>2</sup>), Flack parameter = 0.3(5), Final *Goof* = 1.051, largest difference hole and peak = -0.183 and 0.236 e.Å<sup>-3</sup>. **CCDC deposition number 2296090** contains the supplementary crystallographic data for this paper which can be obtained free of charge at <https://www.ccdc.cam.ac.uk/structures/>

**Data collection and Structure solution details:** Single crystal X-ray data were collected at room temperature on a Bruker D8 QUEST equipped with a four-circle kappa diffractometer and PHOTON-III C7 HPAD detector. An I $\mu$ s microfocus Mo source ( $\lambda=0.71073\text{\AA}$ ) supplied the multi-mirror monochromated incident beam. A combination of Phi and Omega scans were used to collect the necessary data. Integration and scaling of intensity data were accomplished using SAINT program.<sup>1</sup> The structures were solved by Direct Methods using SHELXS97 and refinement was carried out by full-matrix least-squares technique using SHELXL-2019/2.<sup>1-4</sup> Anisotropic displacement parameters were included for all non-hydrogen atoms. All H atoms were positioned geometrically and treated as riding on their parent C atoms, with C-H distances of 0.93--0.97  $\text{\AA}$ , and with  $U_{\text{iso}}(\text{H}) = 1.2U_{\text{eq}}(\text{C})$  or  $1.5U_{\text{eq}}$  for methyl atoms. **CCDC deposition number 2296090** contains the supplementary crystallographic data for this paper which can be obtained free of charge at <https://www.ccdc.cam.ac.uk/structures/>

1. Bruker (2016). APEX3, SAINT and SADABS. Bruker AXS, Inc., Madison, Wisconsin, USA.
2. G. M. Sheldrick, *Acta Crystallogr.*, 2015, **C71**, 3-8.
3. C. B. Hübschle, G. M. Sheldrick and B. Dittrich, ShelXle: a Qt graphical user interface for SHELXL, *J. Appl. Cryst.*, 2011, **44**, 1281-1284.
4. Muller, P, Herbst-Imer, R, Spek, A. L, Schneider, T. R, and Sawaya, M. R. Crystal Structure Refinement: A Crystallographer's Guide to SHELXL. Muller, P. Ed. 2006 Oxford University Press: Oxford, New York, pp. 57–91.

## V. $^1\text{H}$ & $^{13}\text{C}$ NMR Spectra

(2*S*,7*aR*)-2-Methoxy-7*a*-methyl-7-oxo-2,4,5,6,7,7*a*-hexahydro-1*H*-indene-3-carbaldehyde (2a):

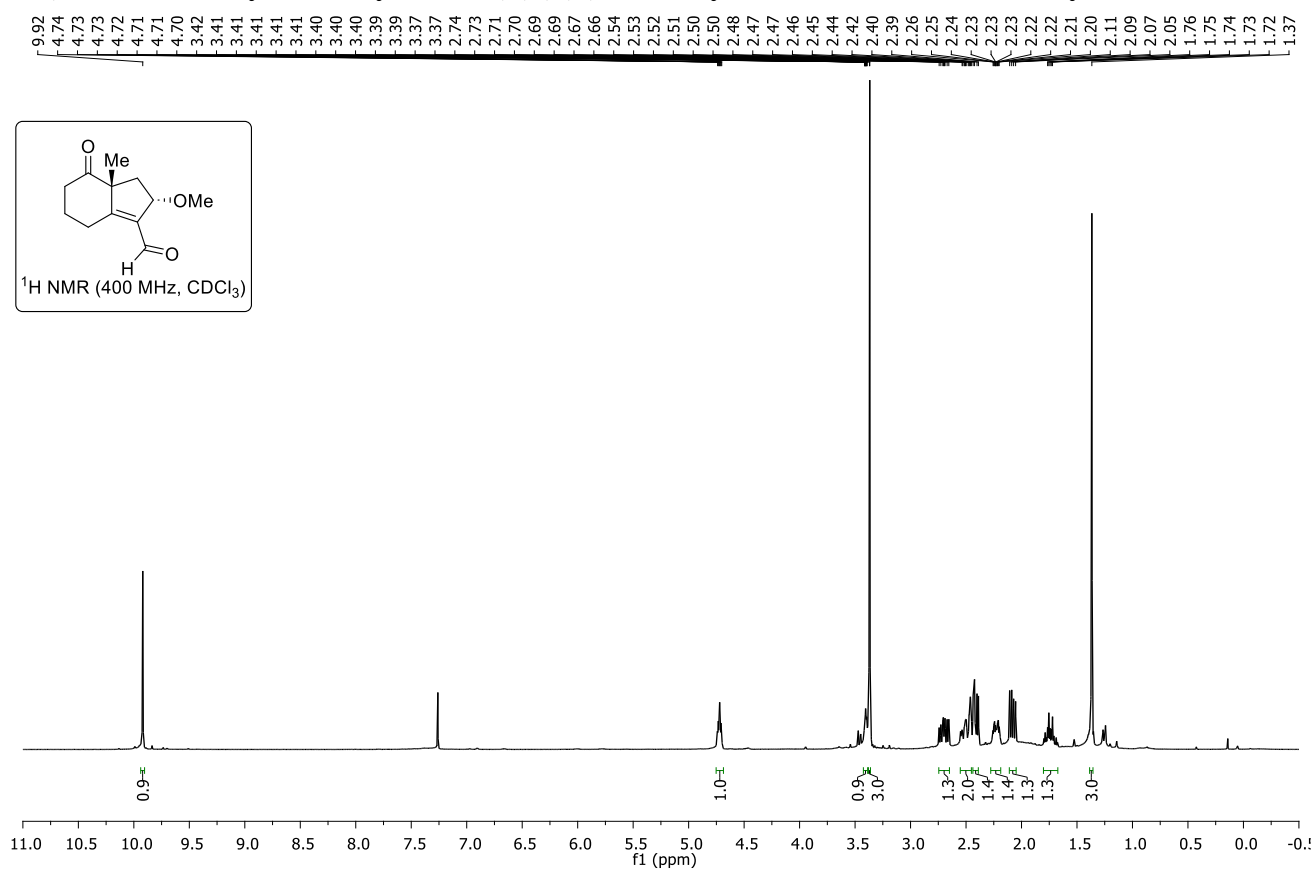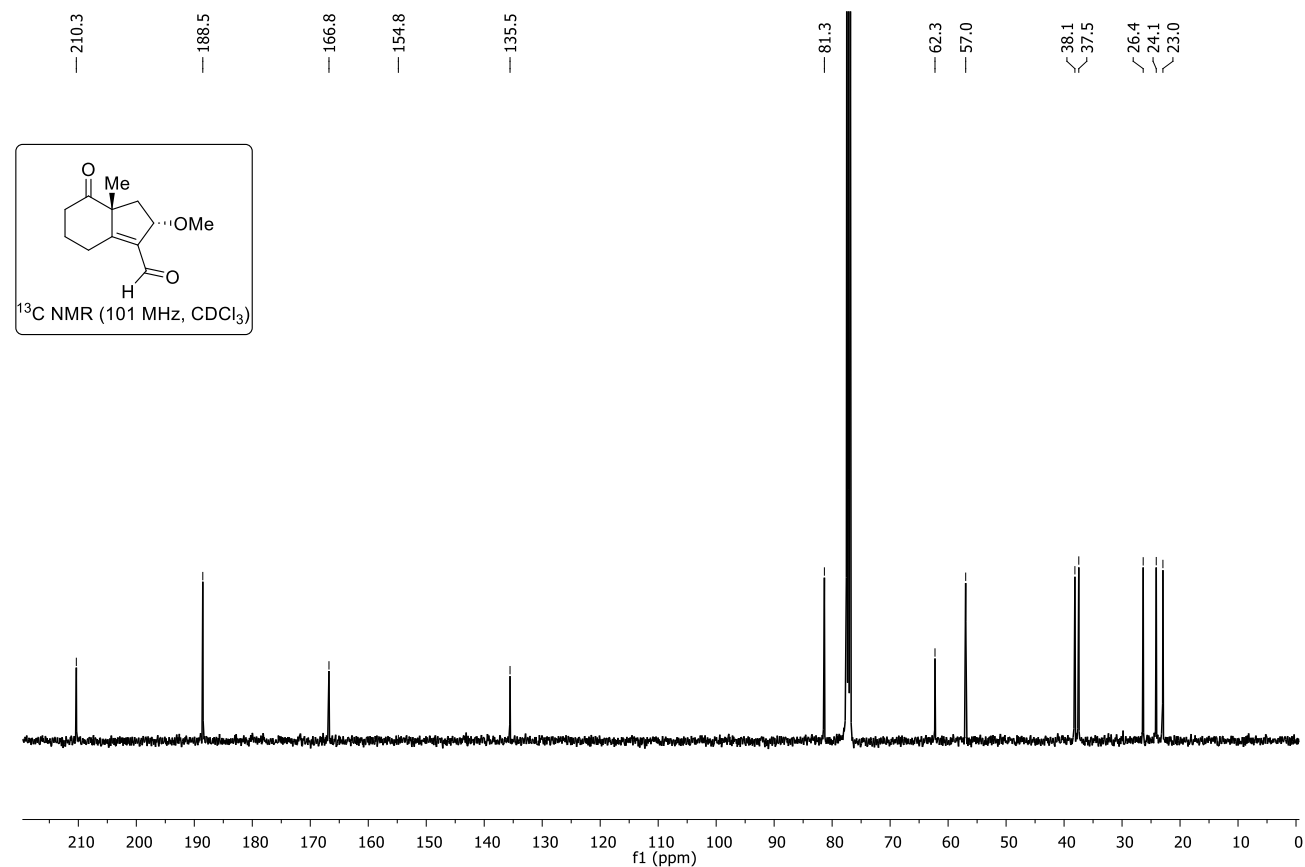

**(2S,7aR)-2-Ethoxy-7a-methyl-7-oxo-2,4,5,6,7,7a-hexahydro-1H-indene-3-carbaldehyde (2b):**

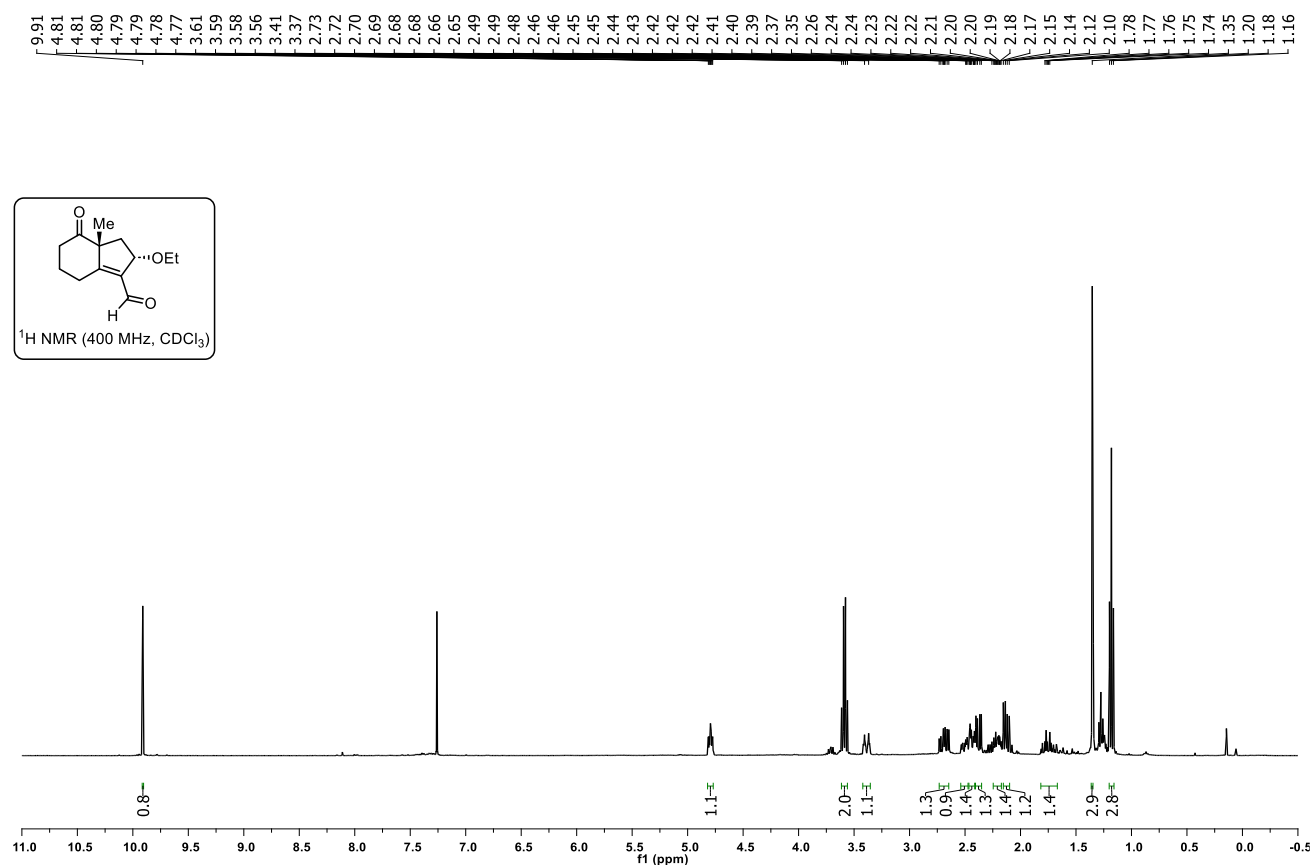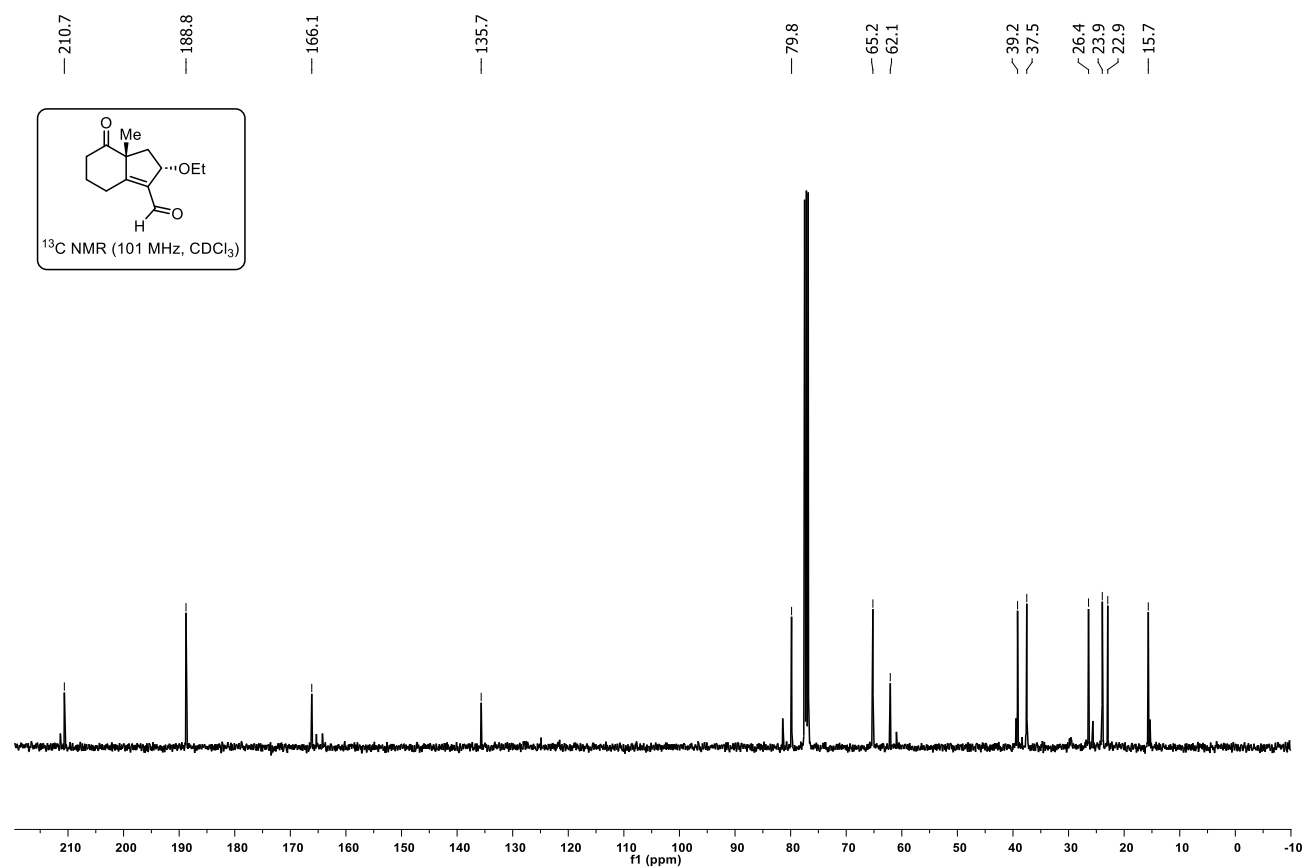

**(2*S*,7*aR*)-2-Isopropoxy-7*a*-methyl-7-oxo-2,4,5,6,7*a*-hexahydro-1*H*-indene-3-carbaldehyde (2c):**

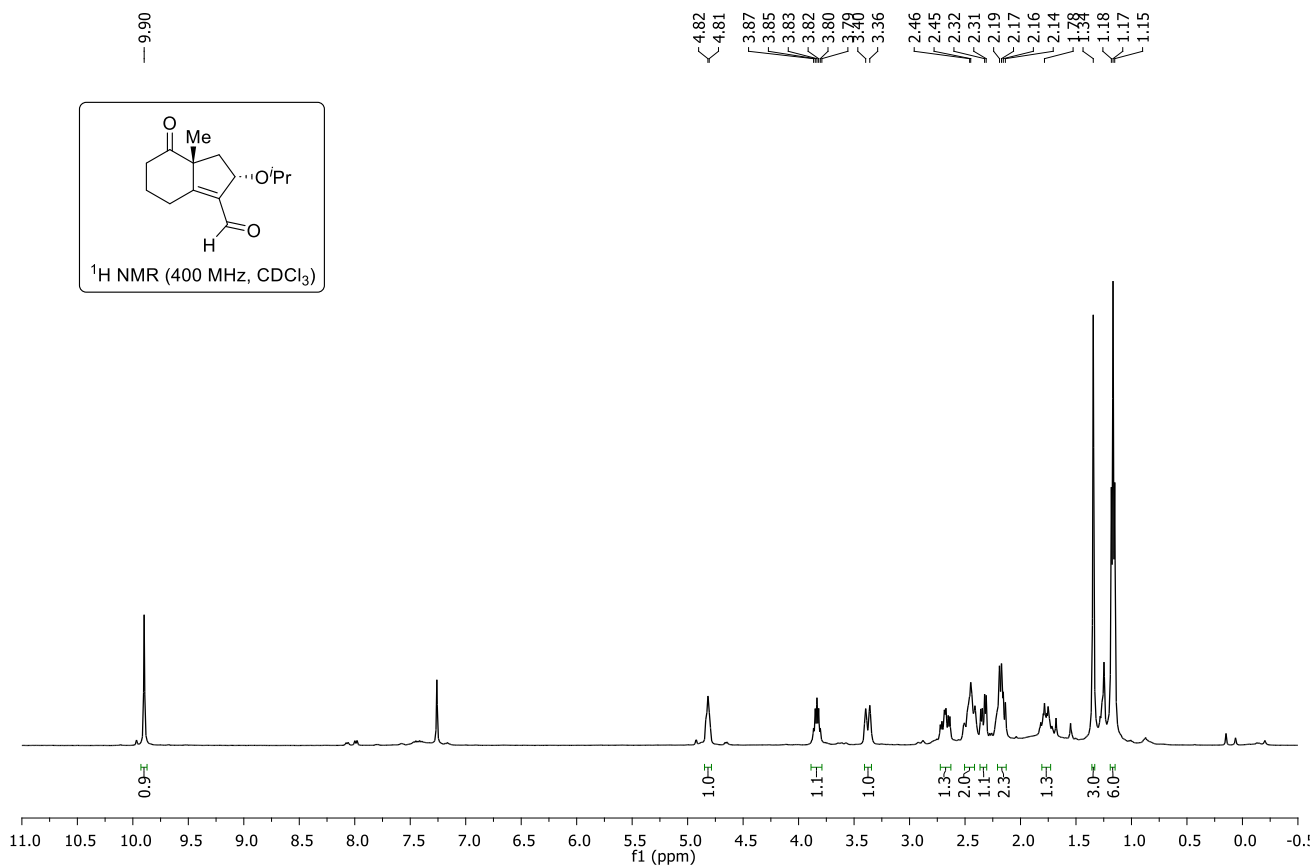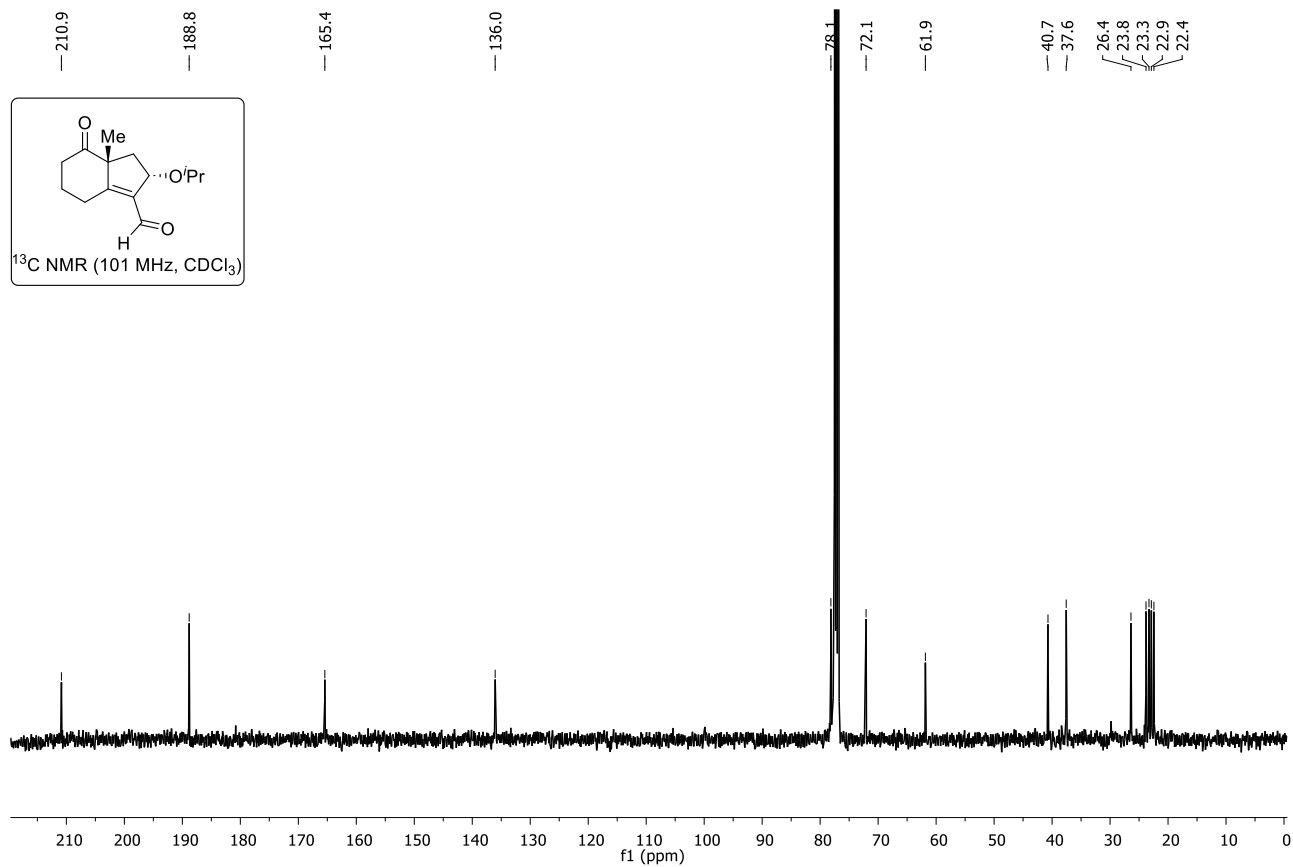

**(2*S*,7*aR*)2-Ethoxy-7-oxo-7*a*-propyl-2,4,5,6,7,7*a*-hexahydro-1*H*-indene-3-carbaldehyde (2d):**

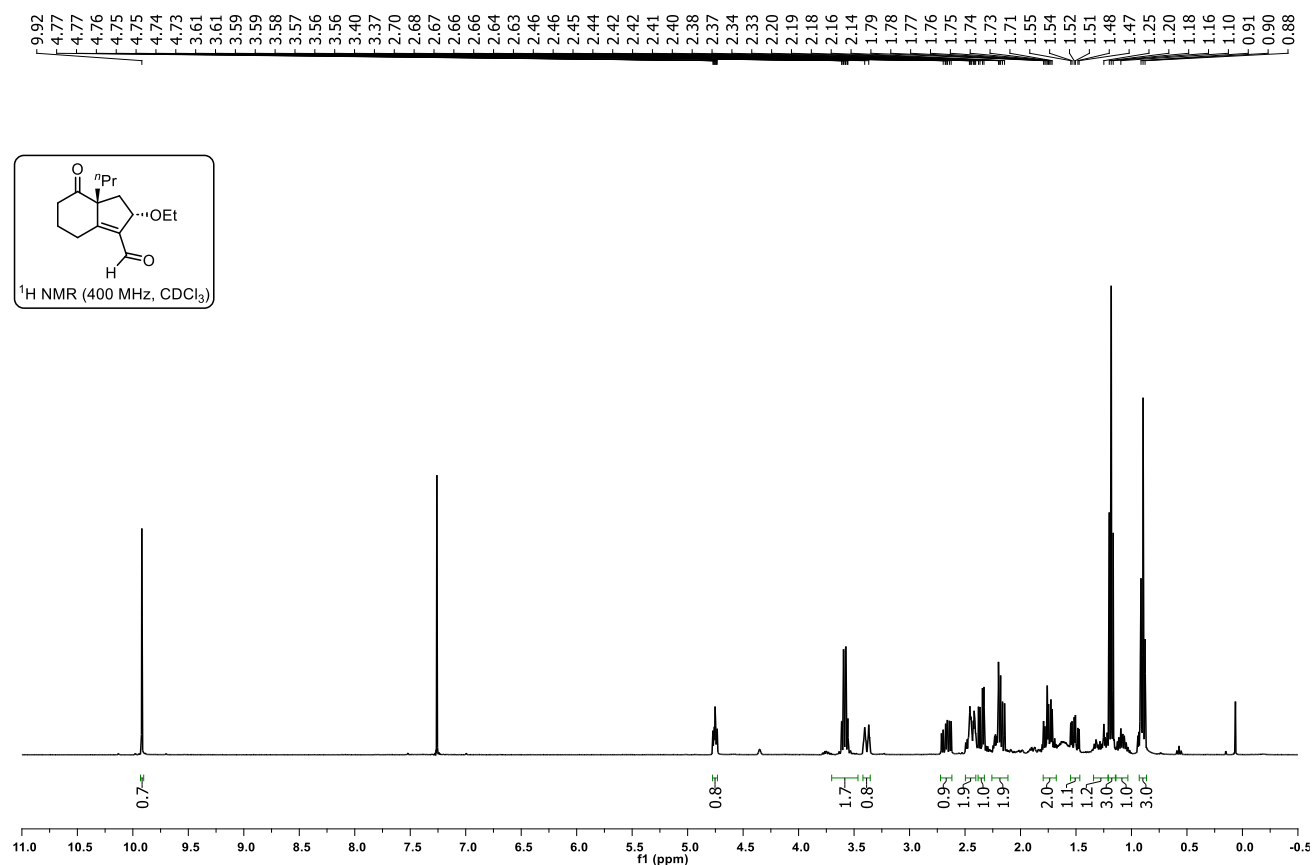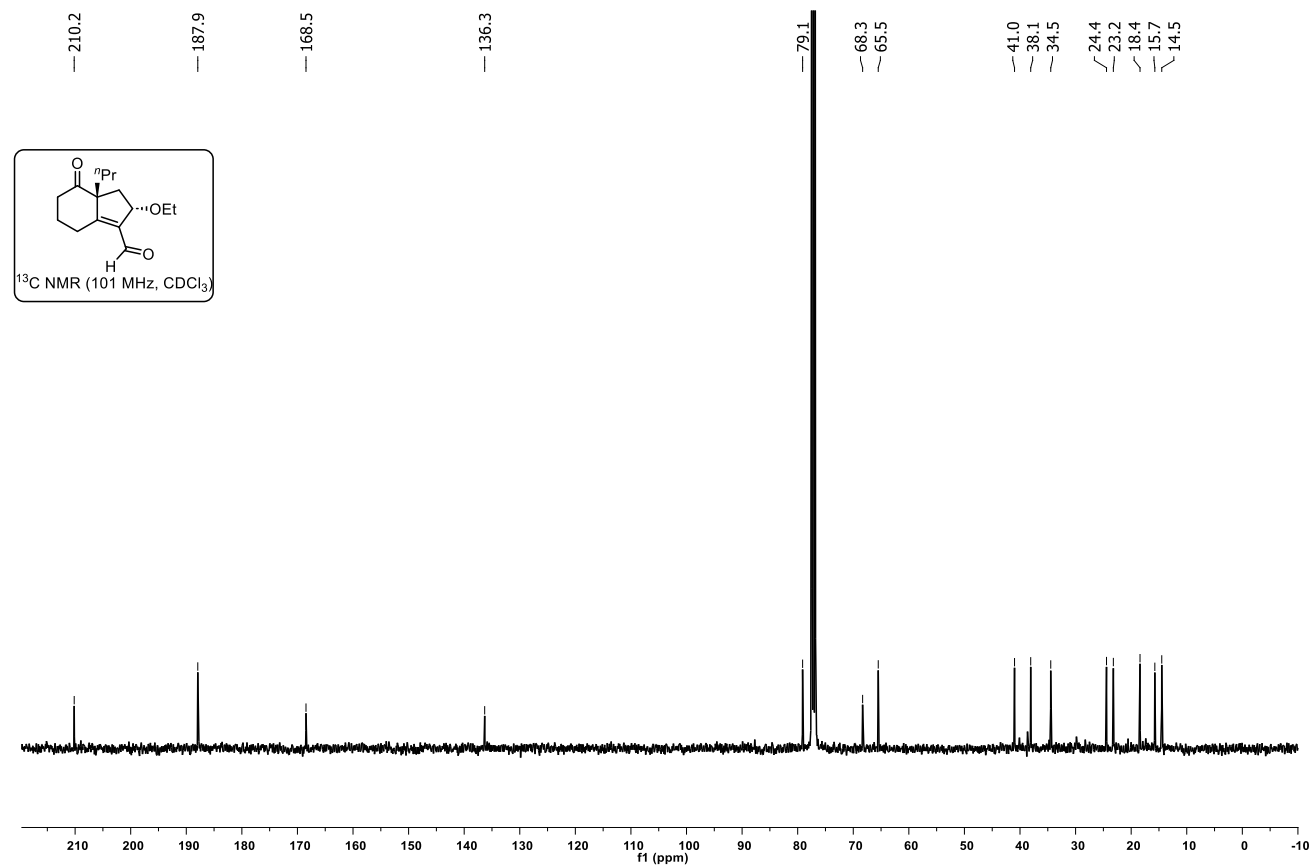

**(2*S*,7*aR*) 7a-(Cyclohexylmethyl)-2-ethoxy-7-oxo-2,4,5,6,7,7a-hexahydro-1*H*-indene-3-carbaldehyde (2e):**

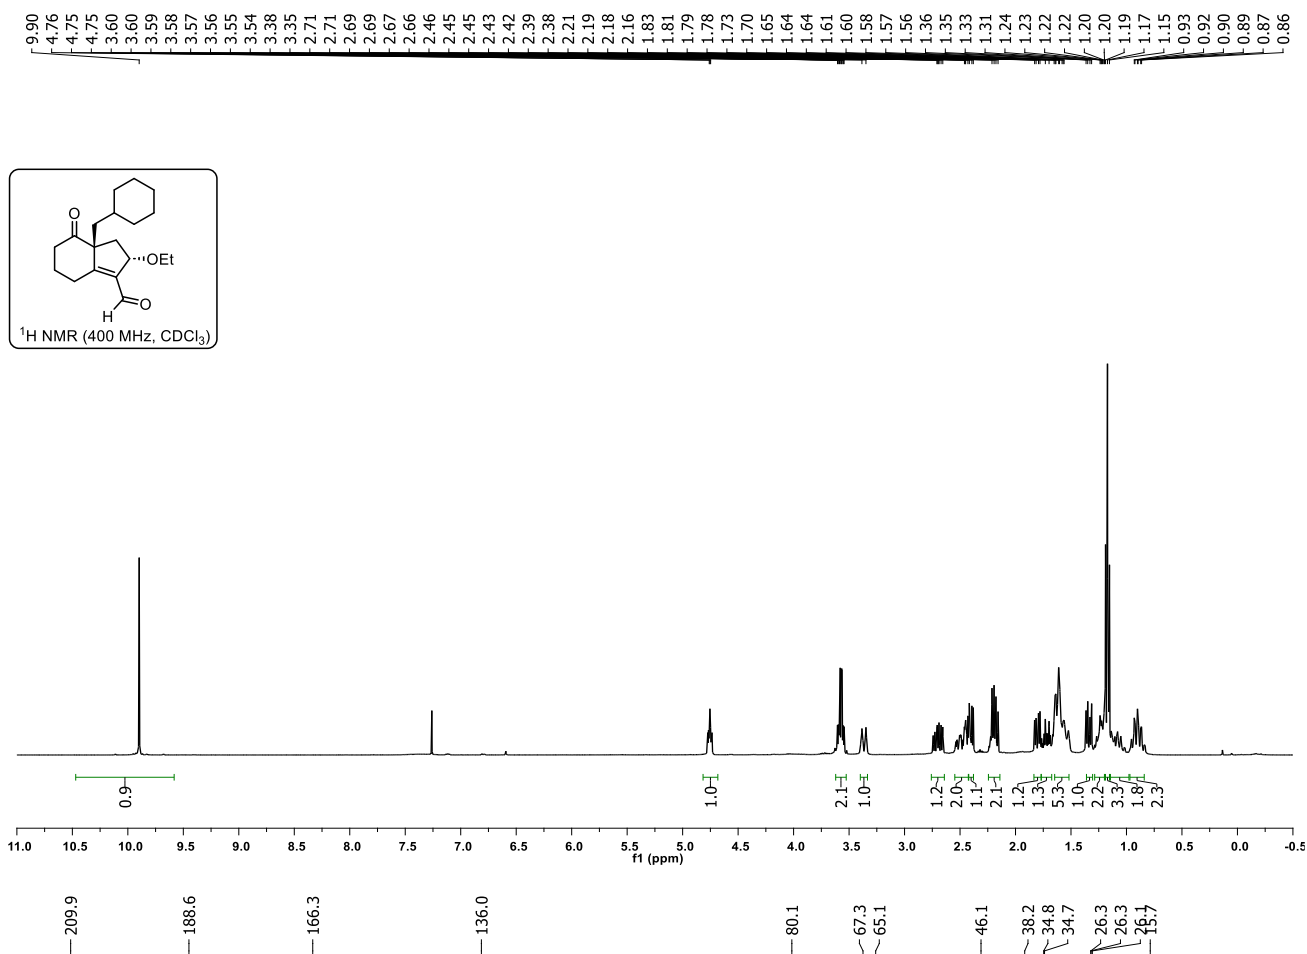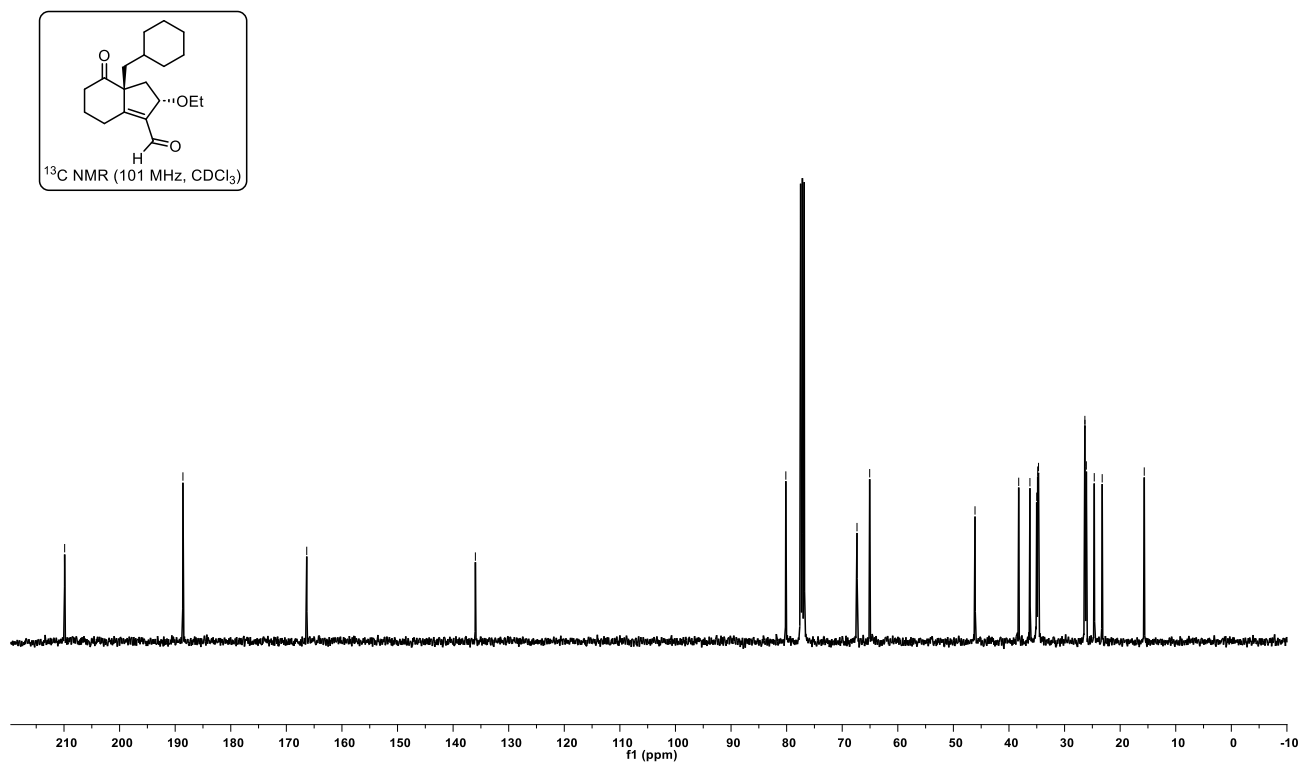

**(2*S*,7*aR*)-7*a*-Allyl-2-ethoxy-7-oxo-2,4,5,6,7,7*a*-hexahydro-1*H*-indene-3-carbaldehyde (2f):**

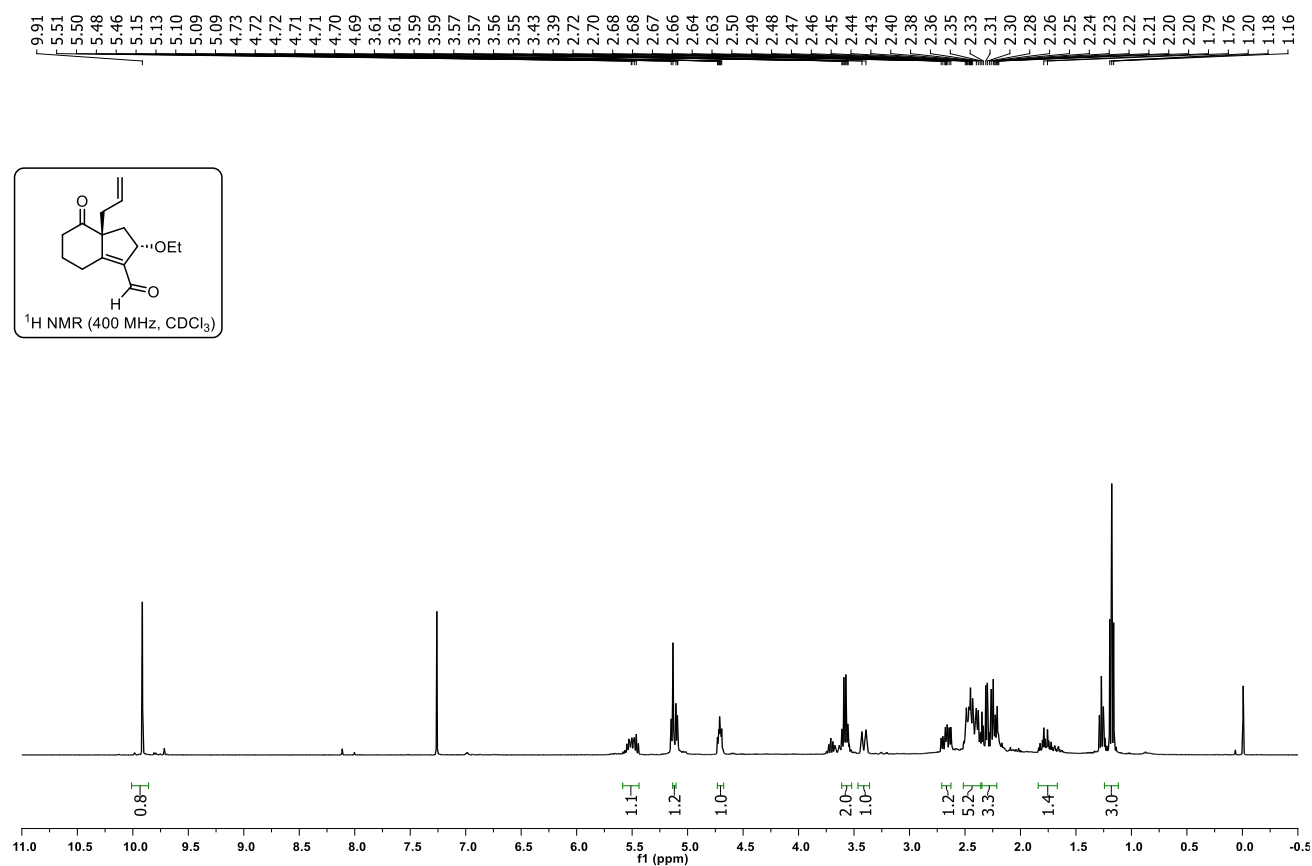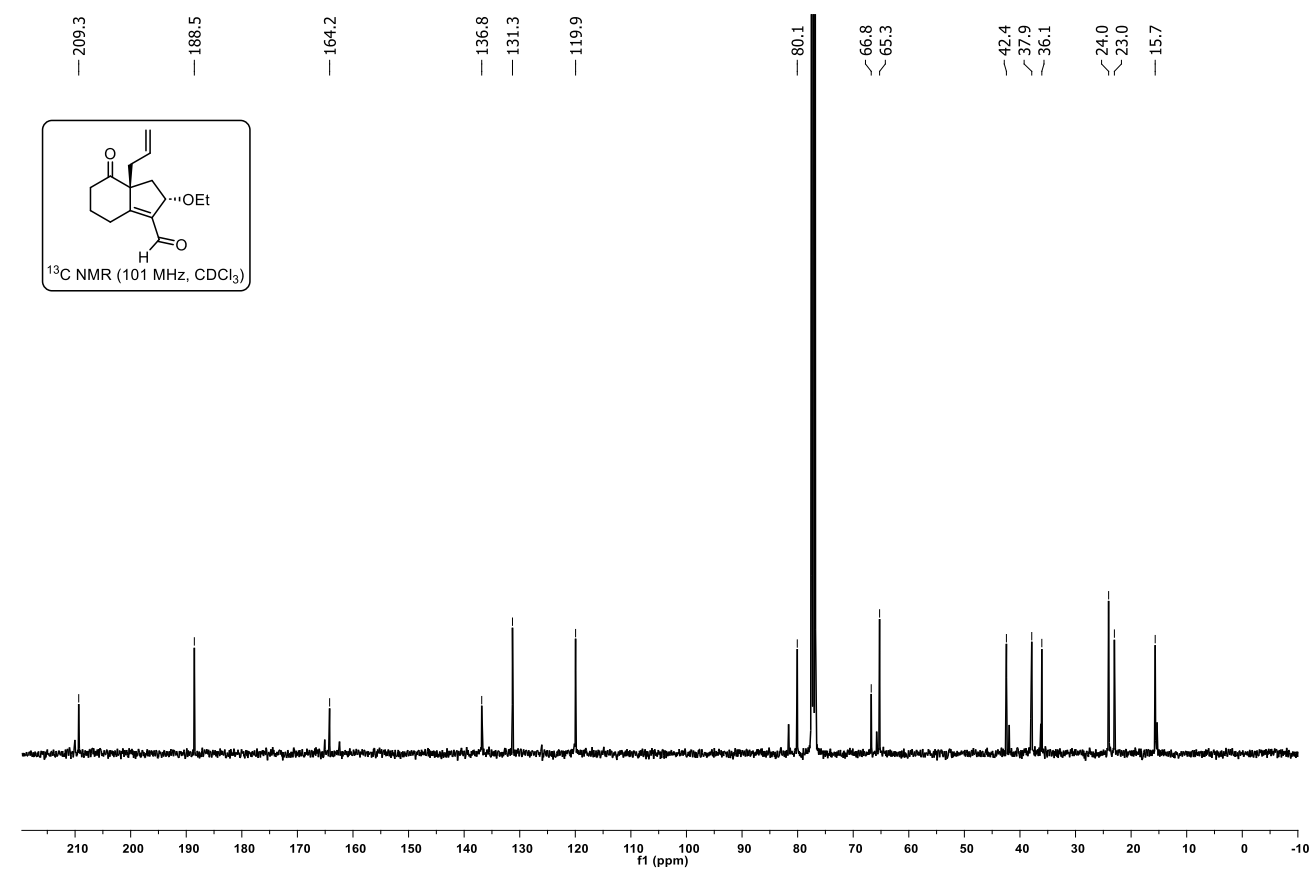

**(2*S*,7*aR*)-7*a*-Benzyl-2-ethoxy-7-oxo-2,4,5,6,7,7*a*-hexahydro-1*H*-indene-3-carbaldehyde (2g):**

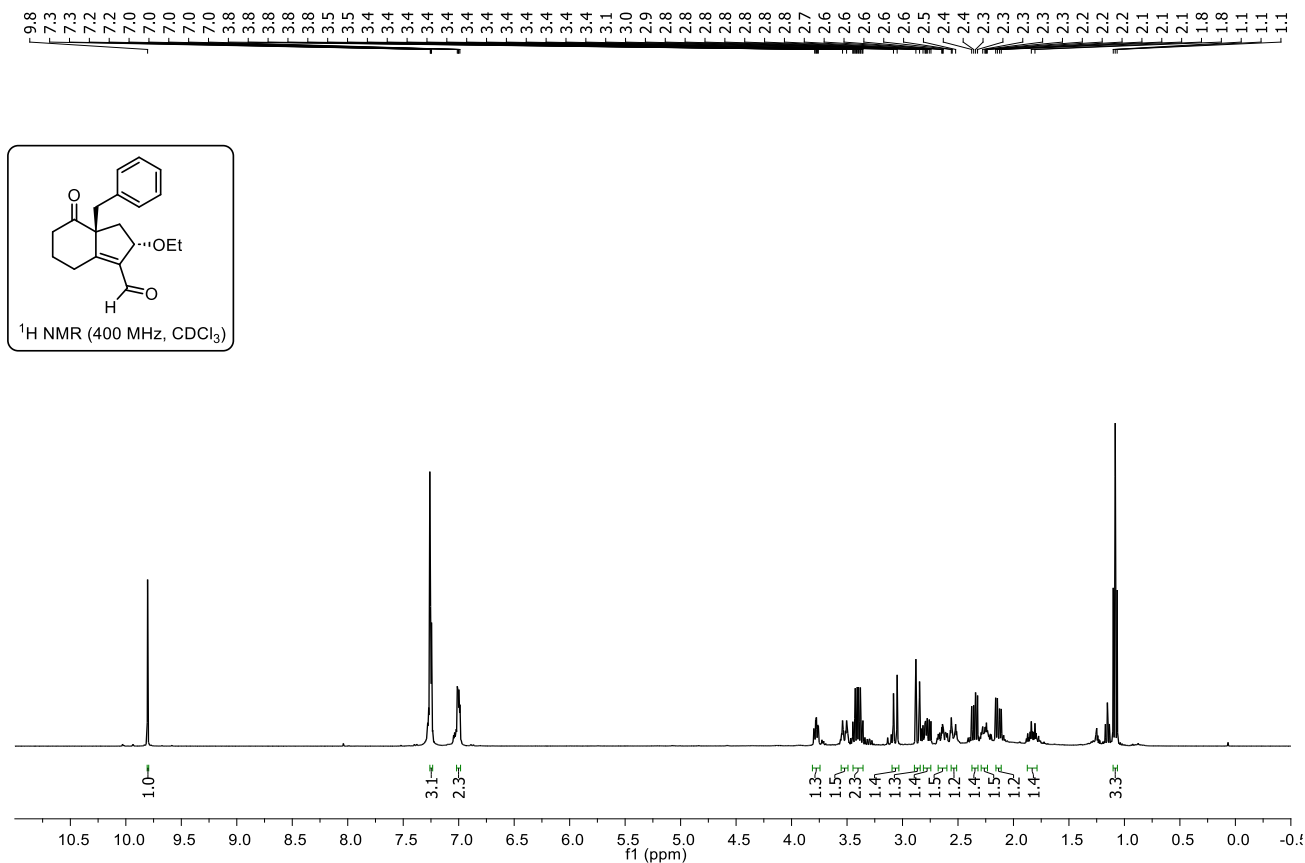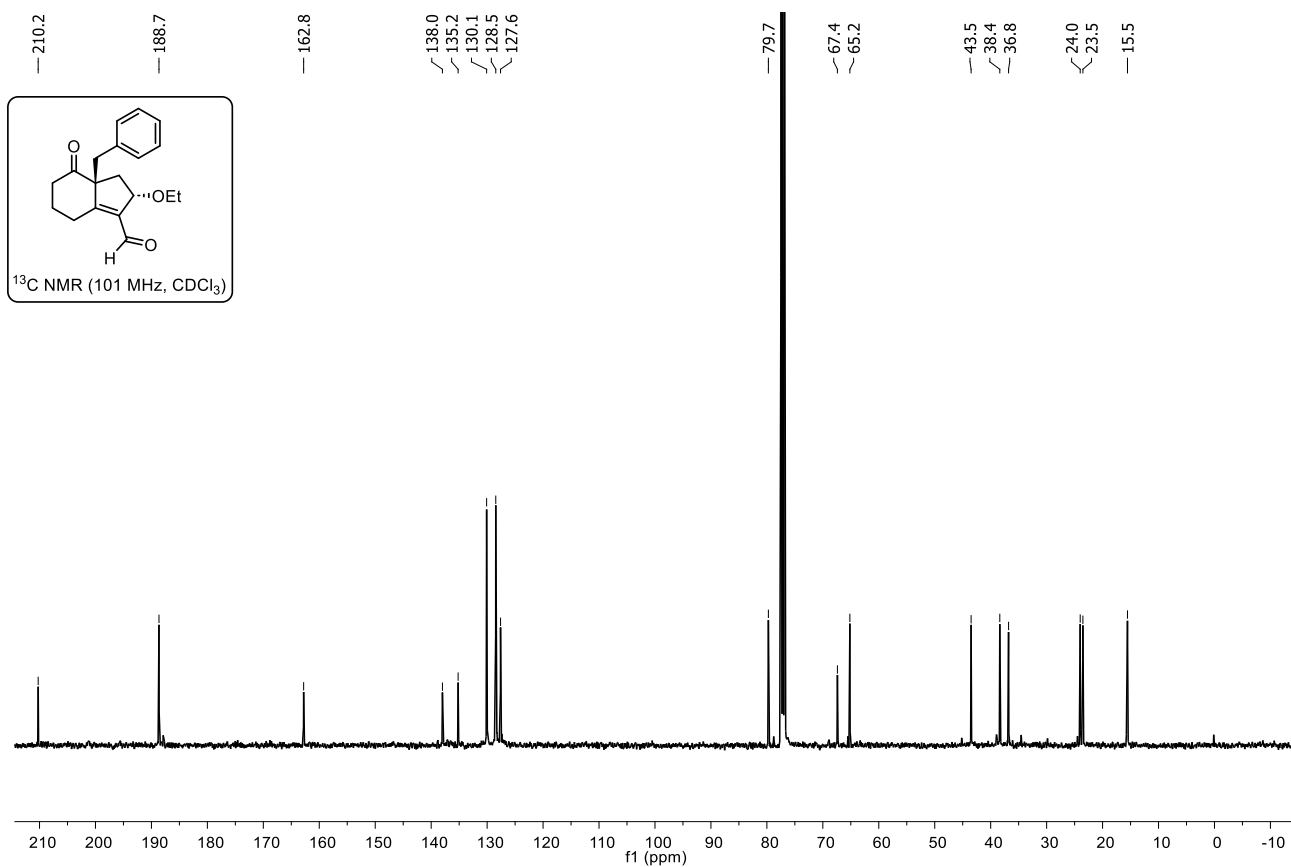

**(2*S*,7*aR*)-2-Ethoxy-7*a*-(4-methylbenzyl)-7-oxo-2,4,5,6,7,7*a*-hexahydro-1*H*-indene-3-carbaldehyde (2h):**

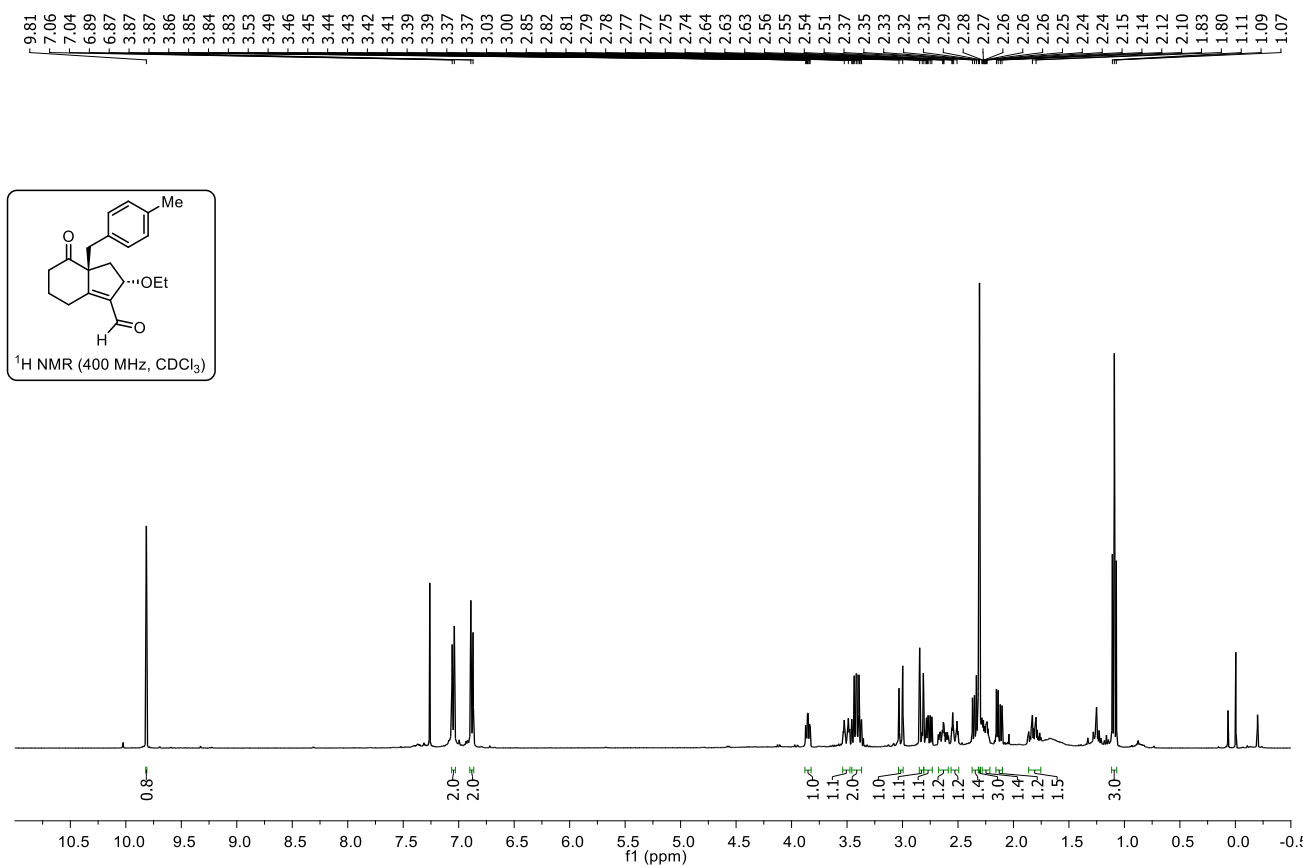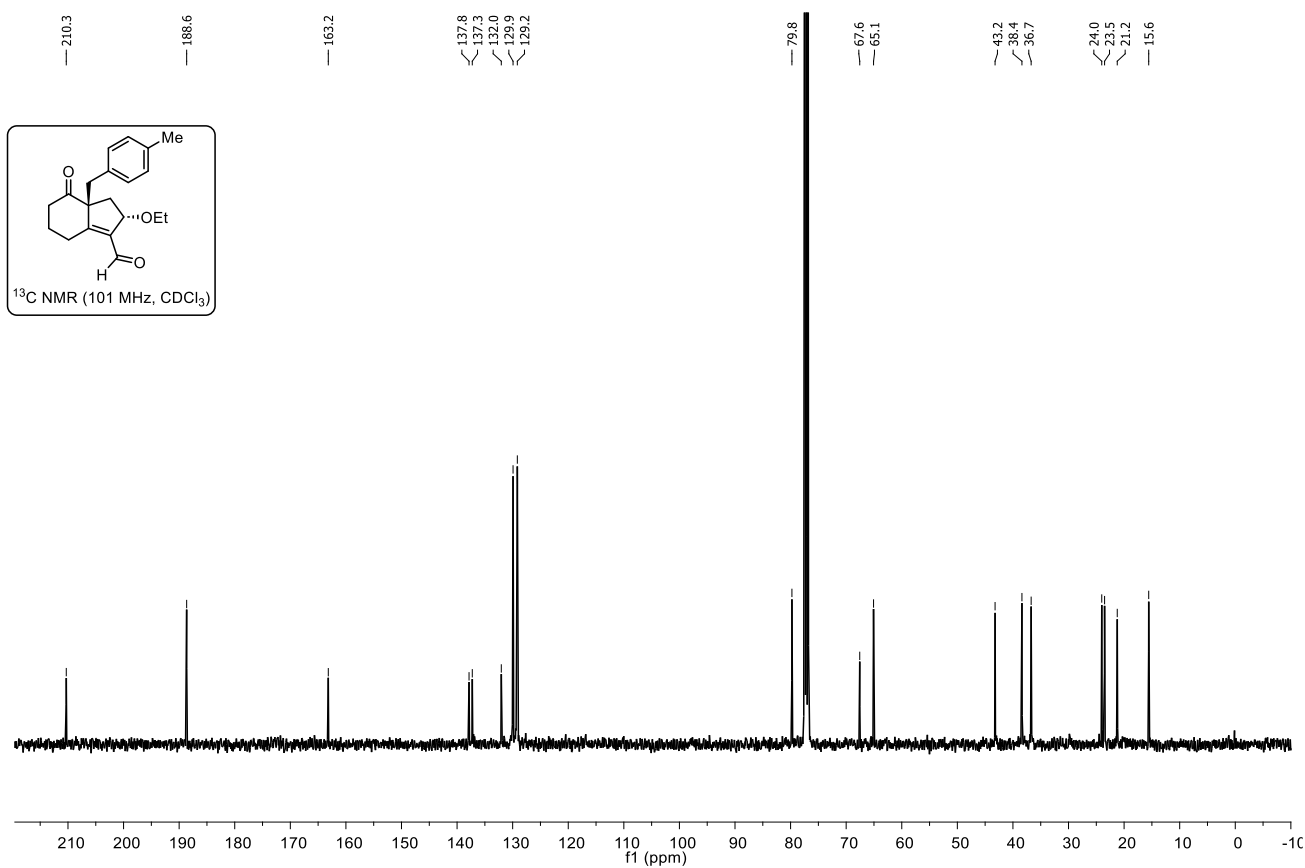

**(2*S*,7*aR*)-2-Ethoxy-7*a*-(4-fluorobenzyl)-7-oxo-2,4,5,6,7,7*a*-hexahydro-1*H*-indene-3-carbaldehyde (2i):**

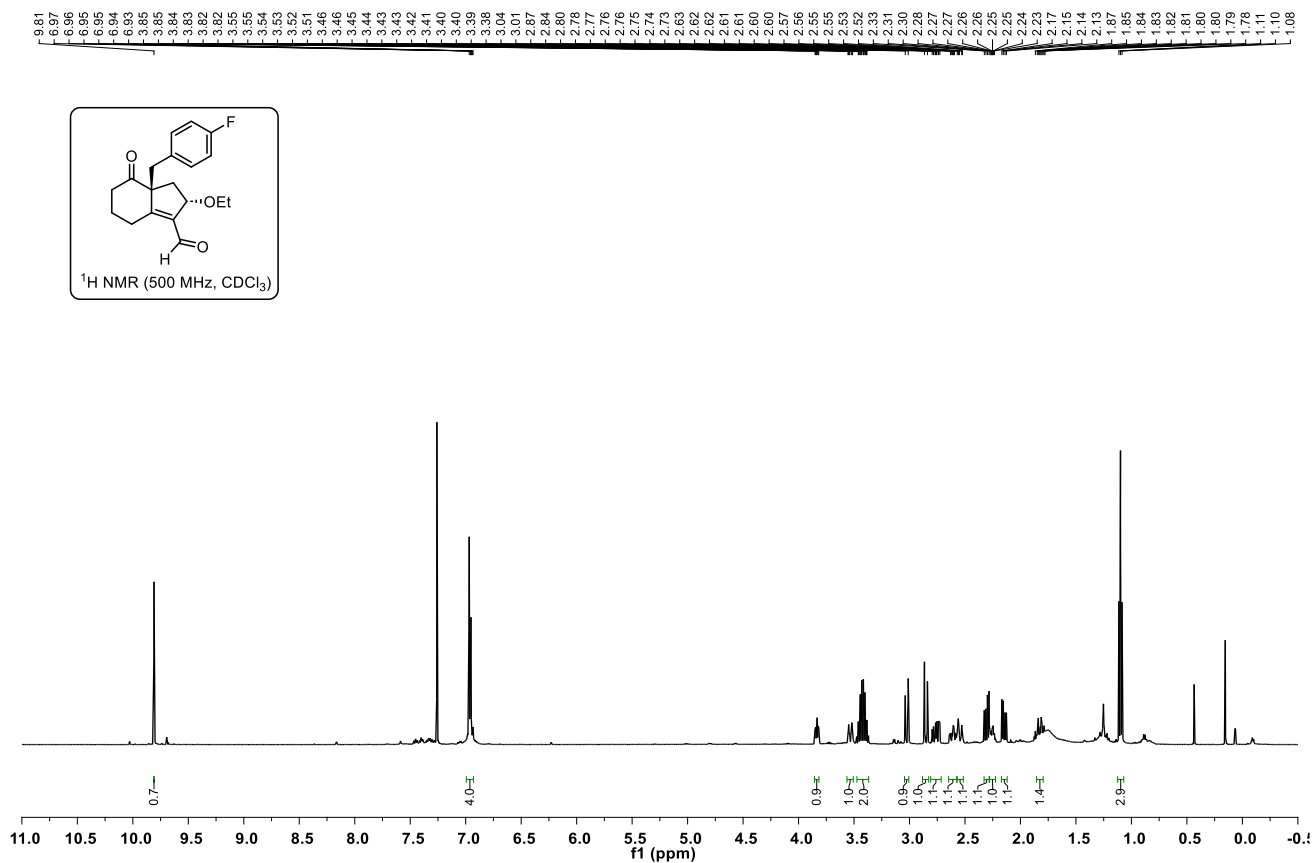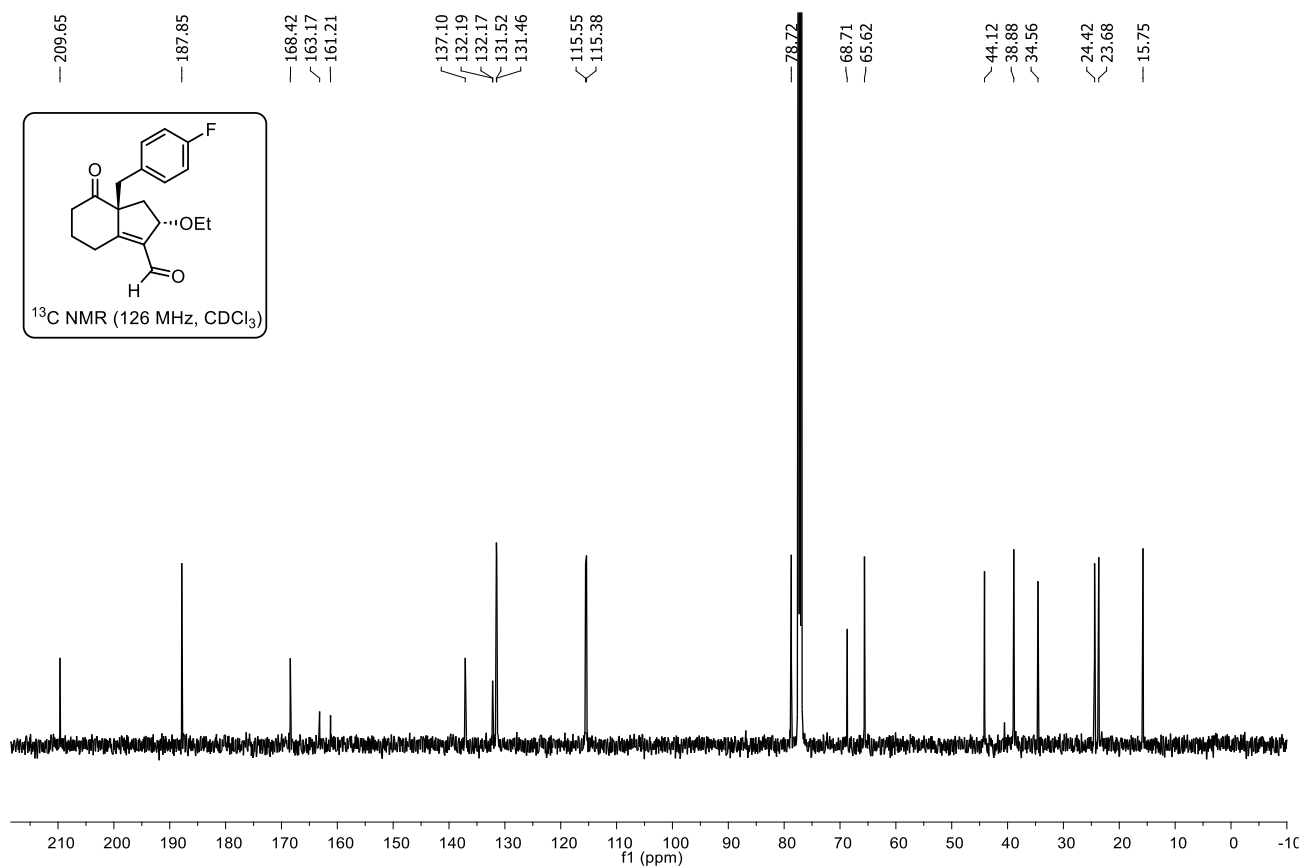

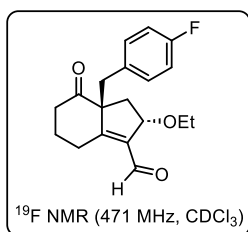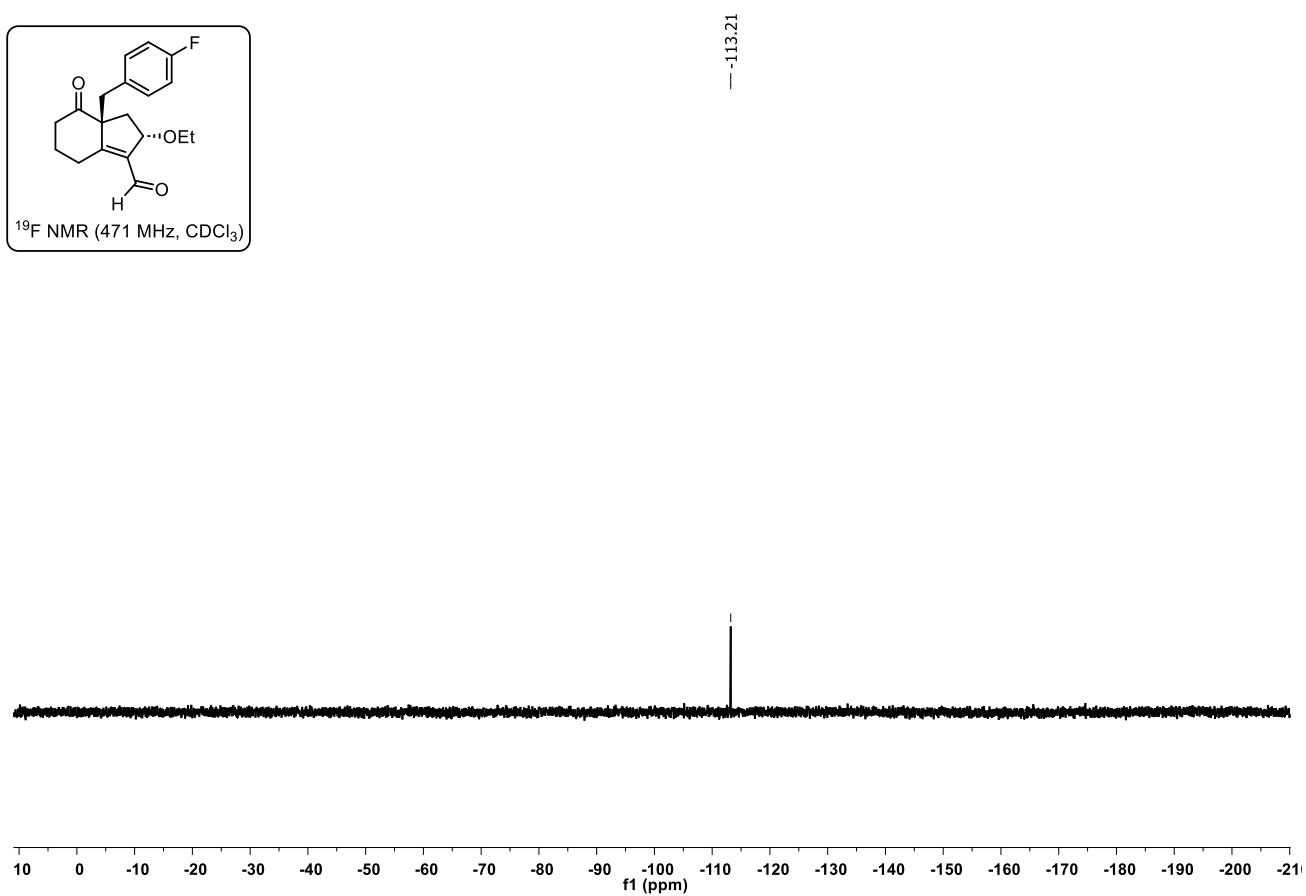

**(2*S*,7*aR*)-7a-(4-Chlorobenzyl)-2-ethoxy-7-oxo-2,4,5,6,7*a*-hexahydro-1*H*-indene-3-carbaldehyde (2j):**

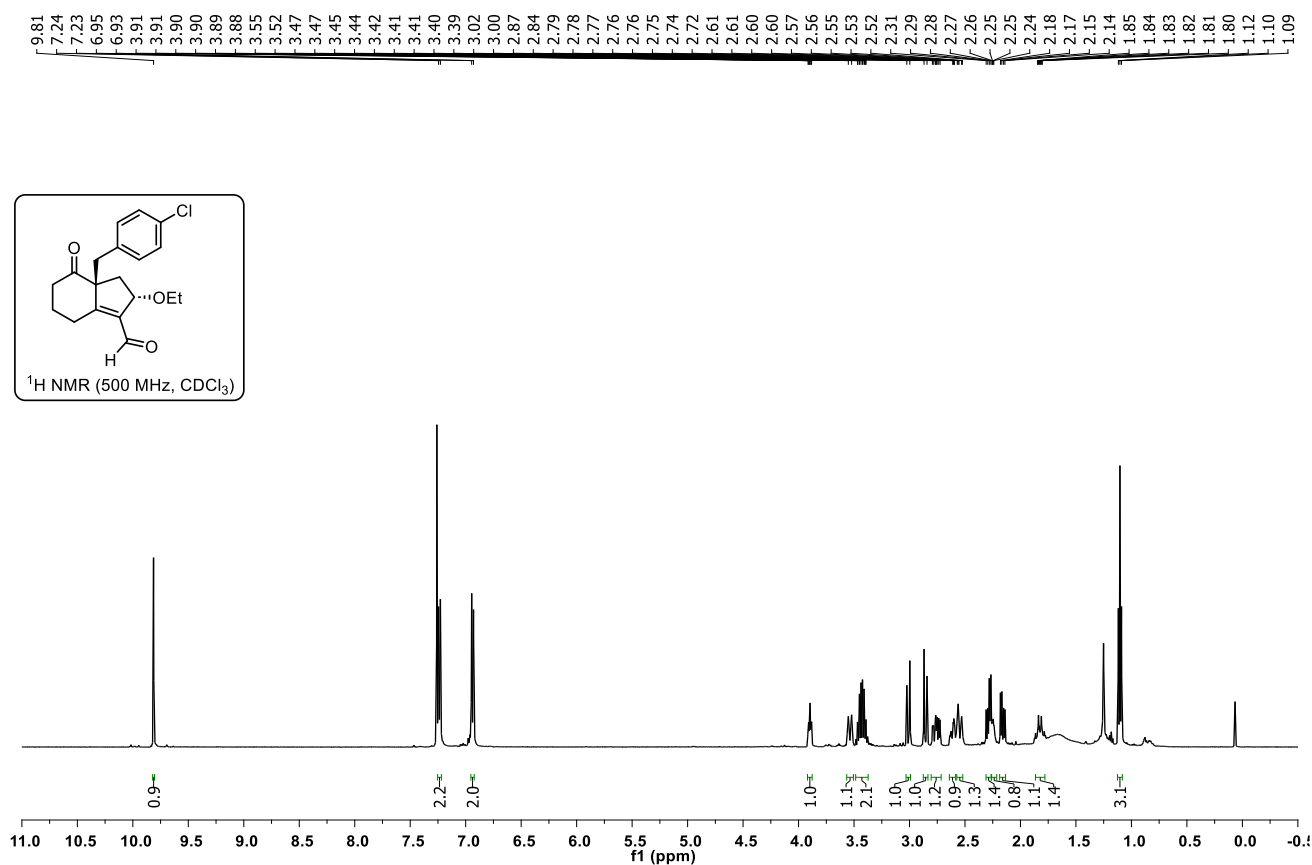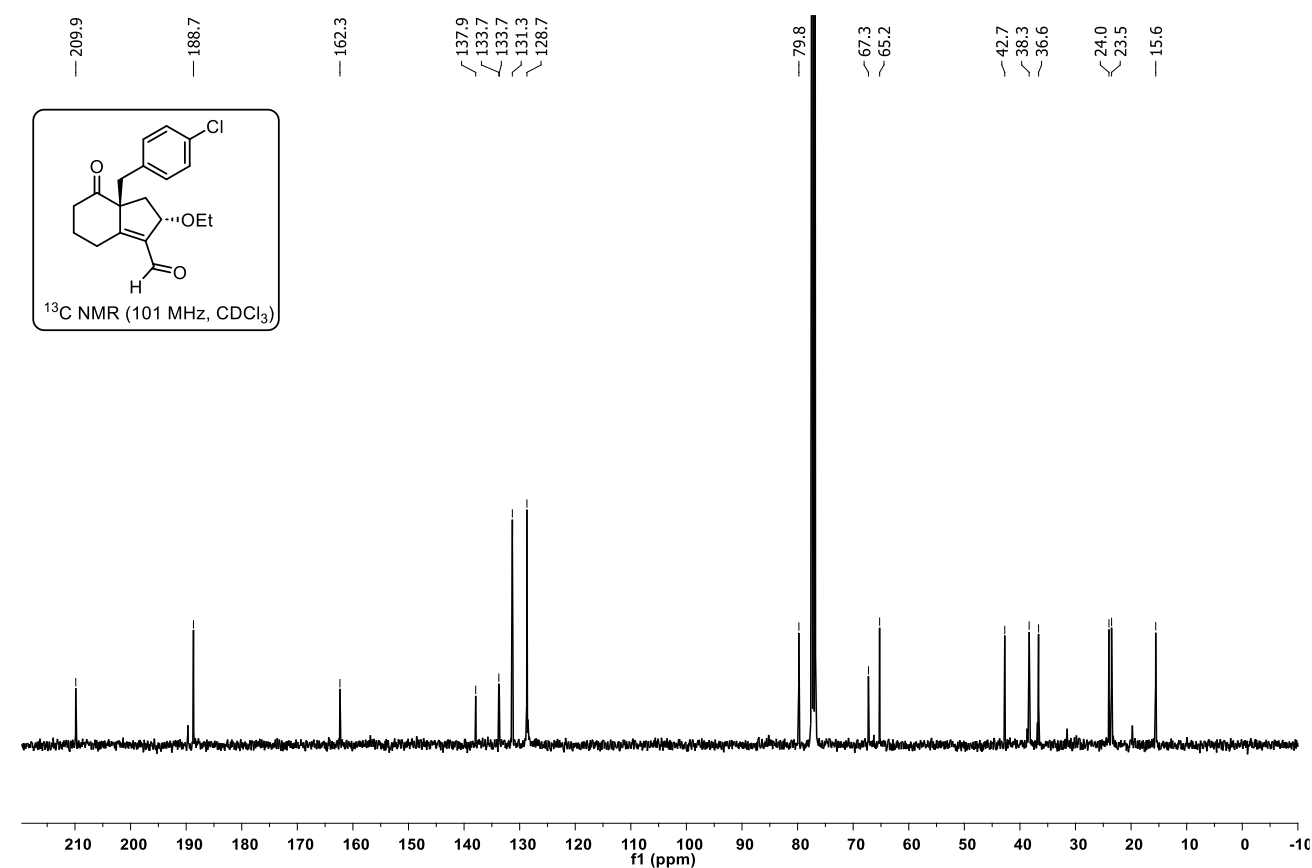

**(2*S*,7*aR*)-7a-(4-Bromobenzyl)-2-ethoxy-7-oxo-2,4,5,6,7,7a-hexahydro-1*H*-indene-3-carbaldehyde (2k):**

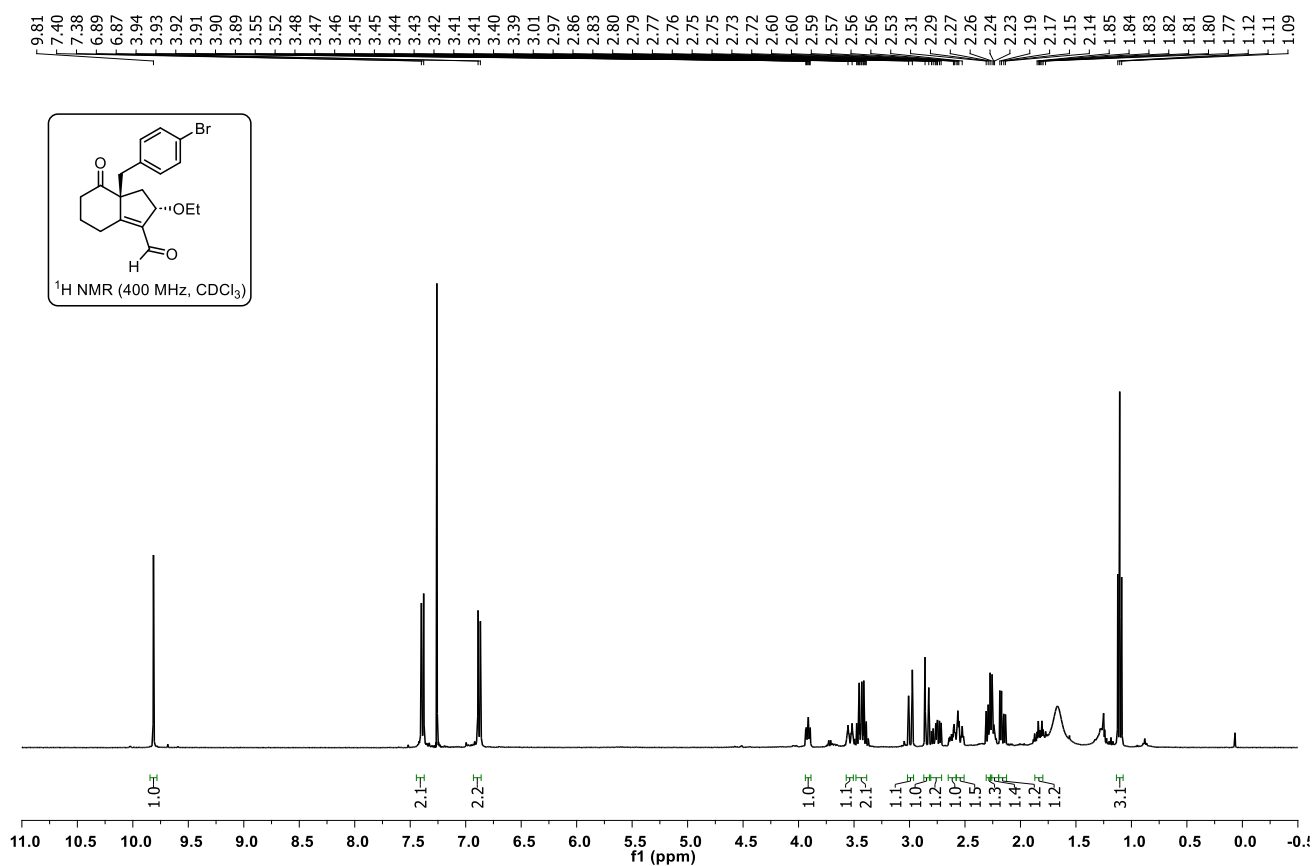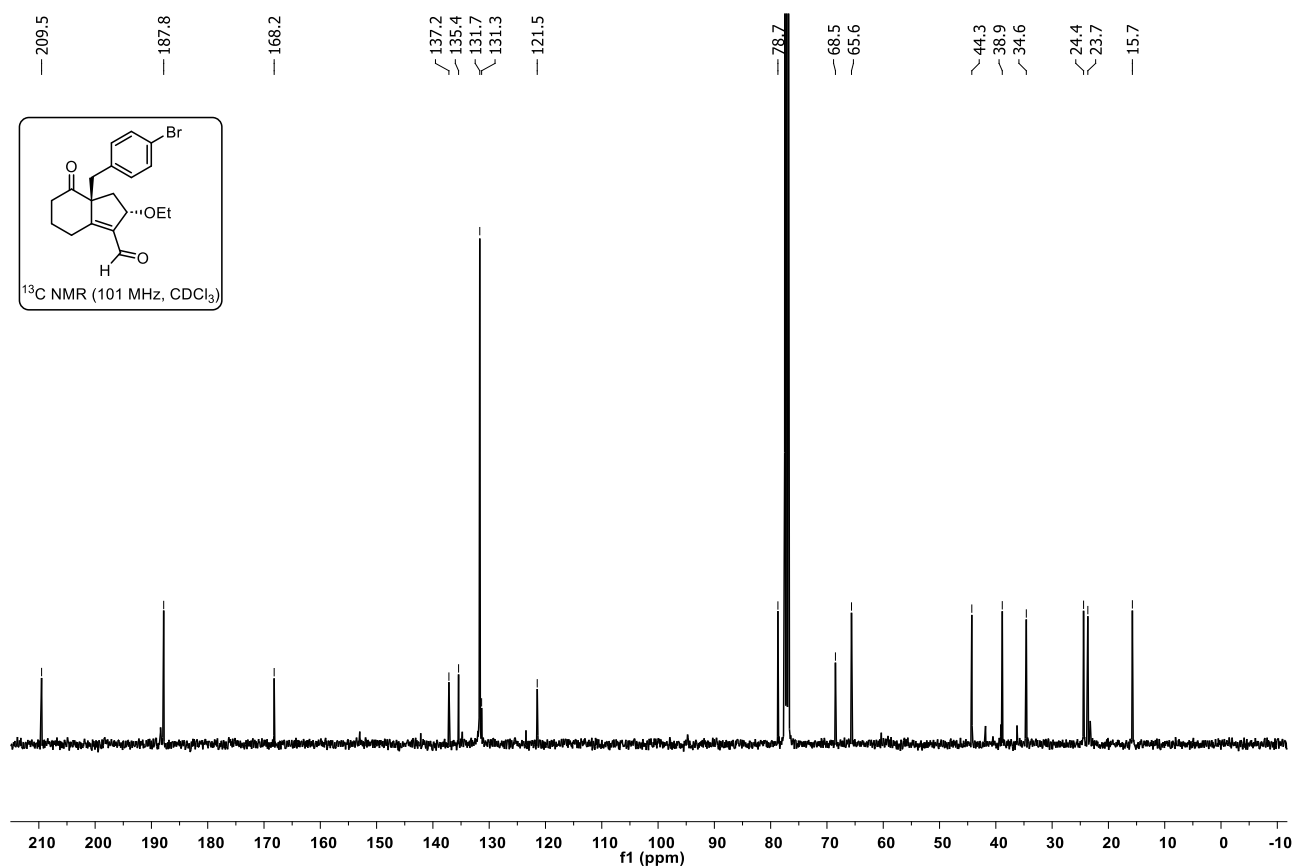

**(2*S*,7*aR*)-7a-([1,1'-Biphenyl]-4-ylmethyl)-2-ethoxy-7-oxo-2,4,5,6,7,7*a*-hexahydro-1*H*-indene-3-carbaldehyde (2l):**

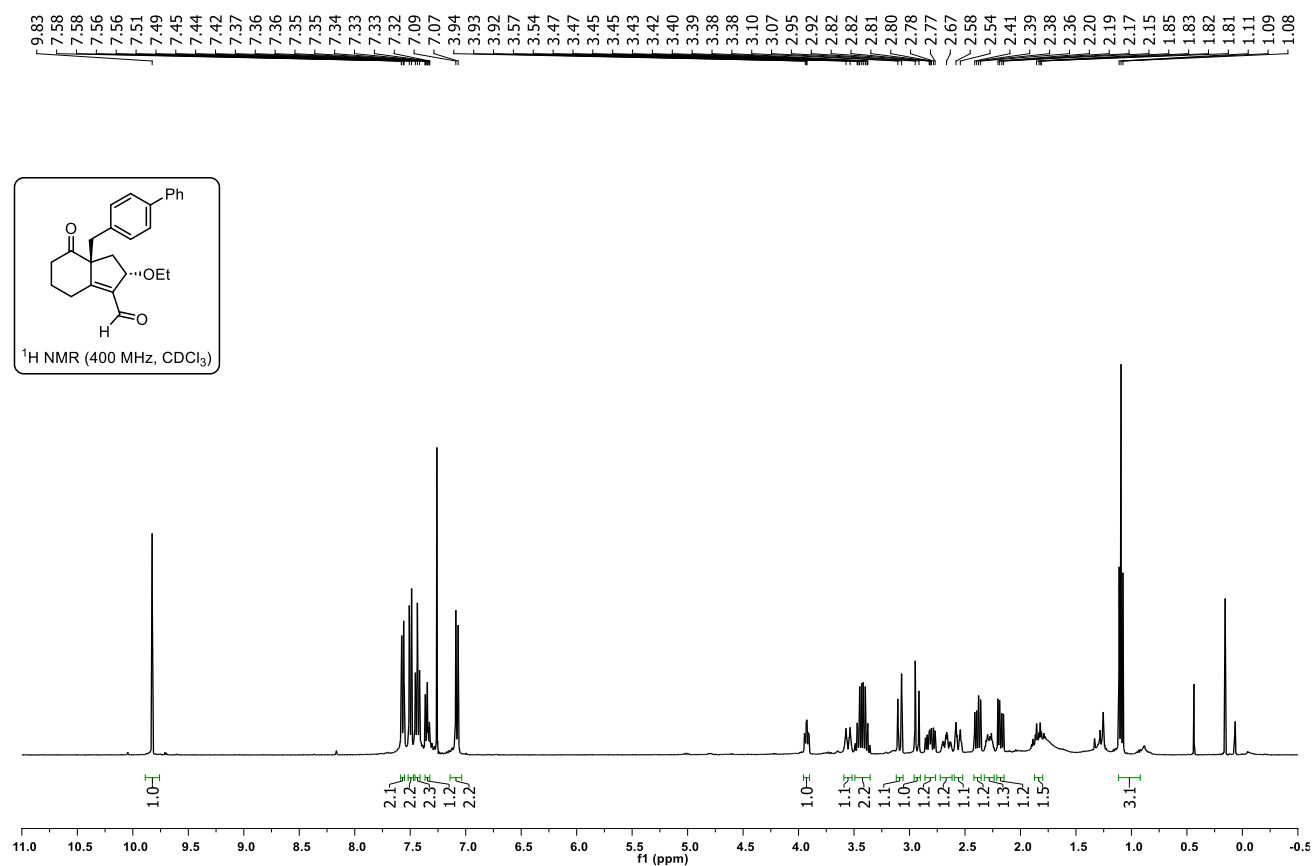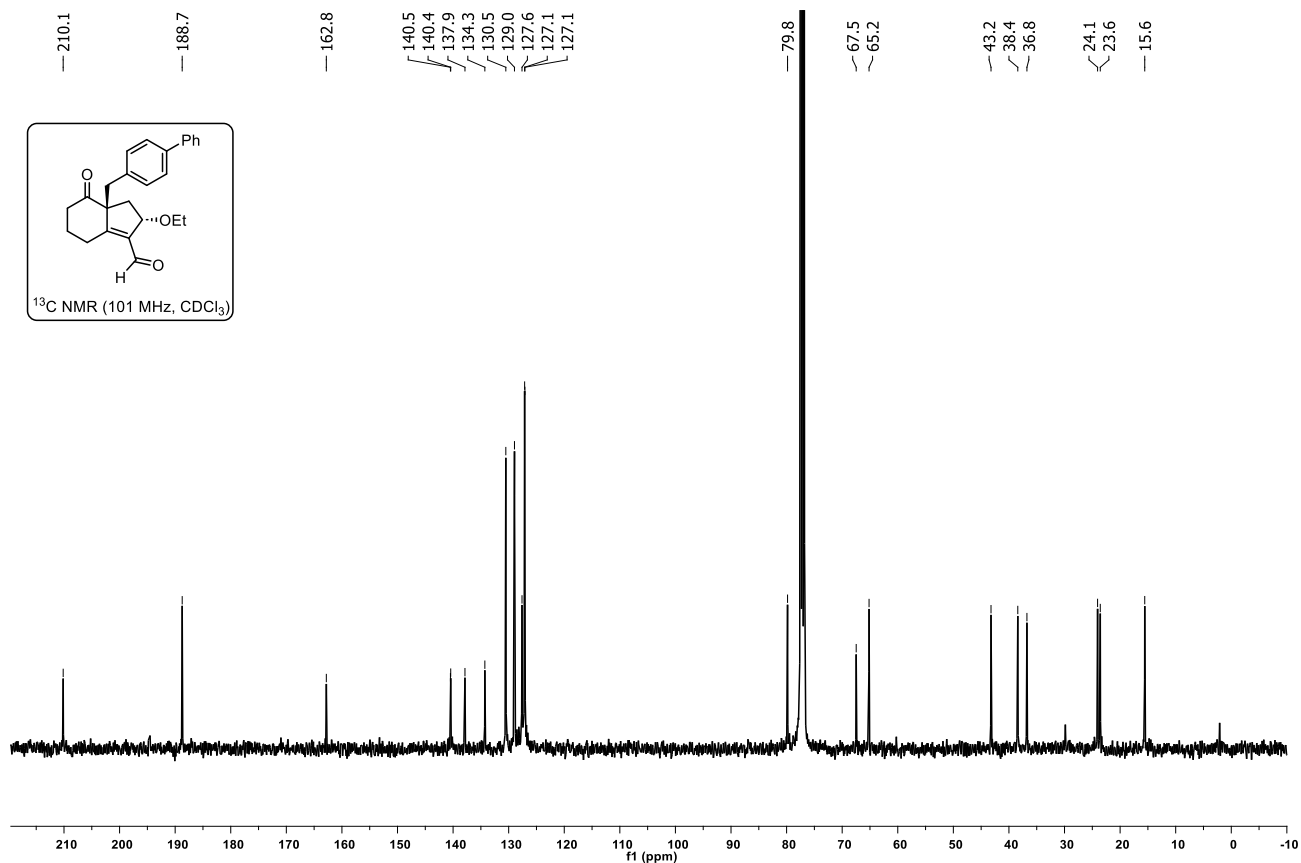

**(2*S*,7*aR*)-2-Methoxy-7*a*-(4-nitrobenzyl)-7-oxo-2,4,5,6,7,7*a*-hexahydro-1*H*-indene-3-carbaldehyde (2m):**

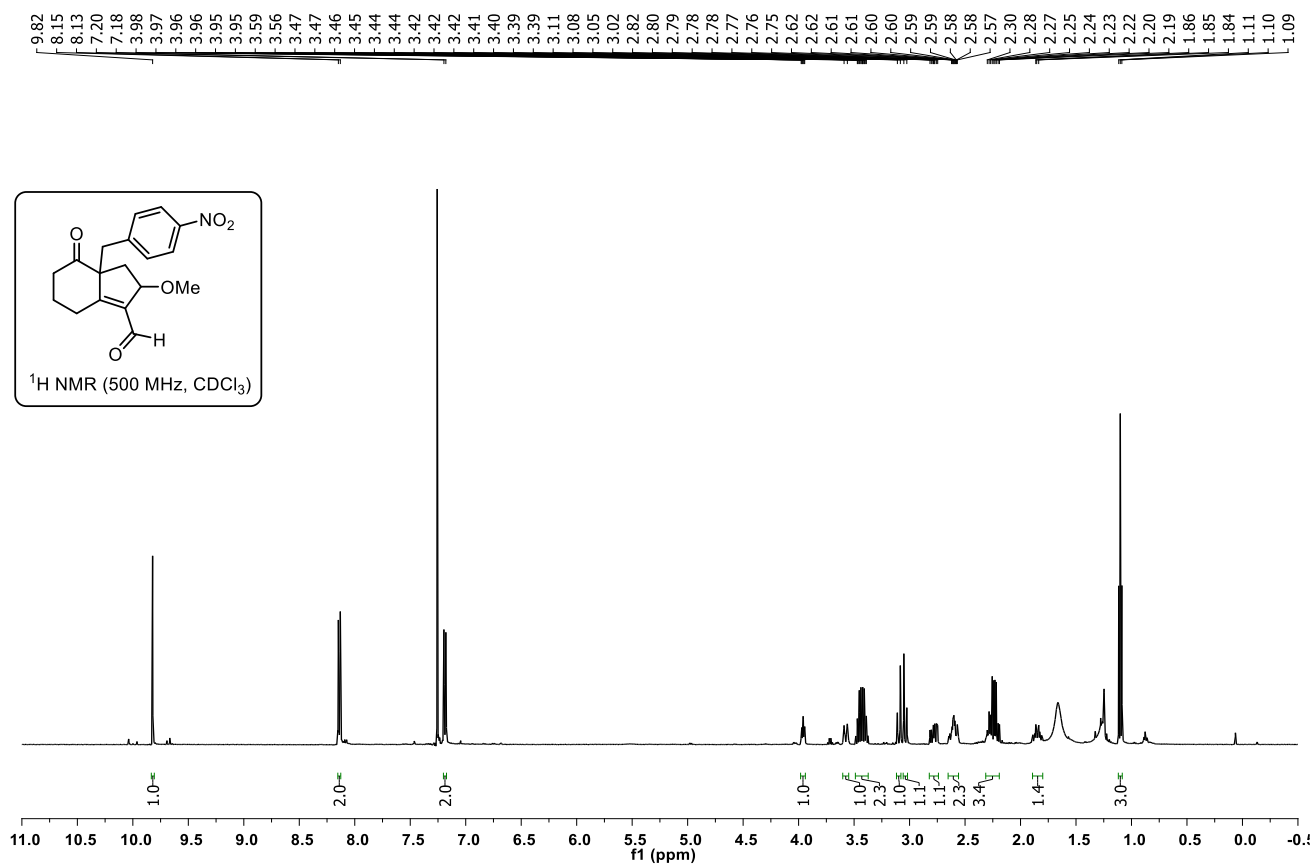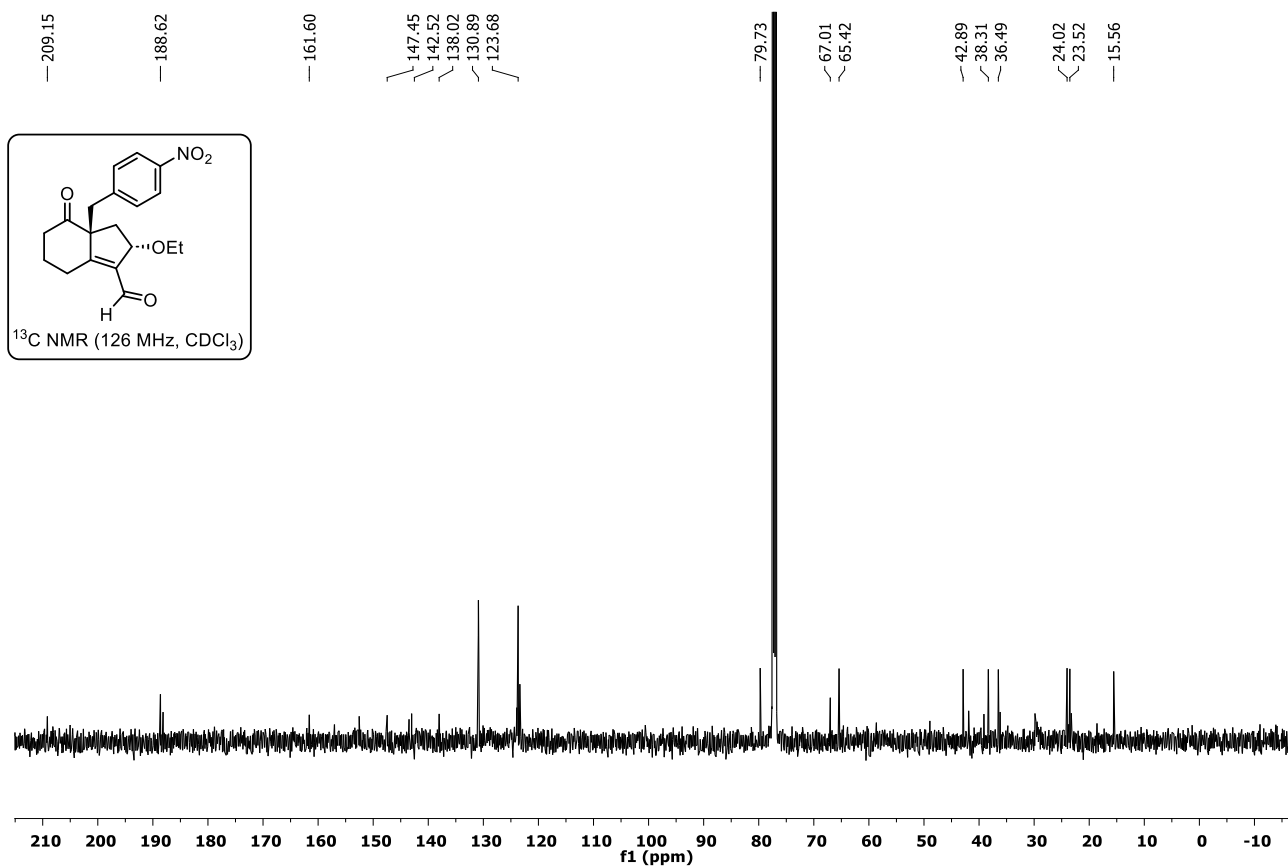

**(2*S*,7*aR*)-2-Ethoxy-7*a*-(3-methoxybenzyl)-7-oxo-2,4,5,6,7,7*a*-hexahydro-1*H*-indene-3-carbaldehyde (2n):**

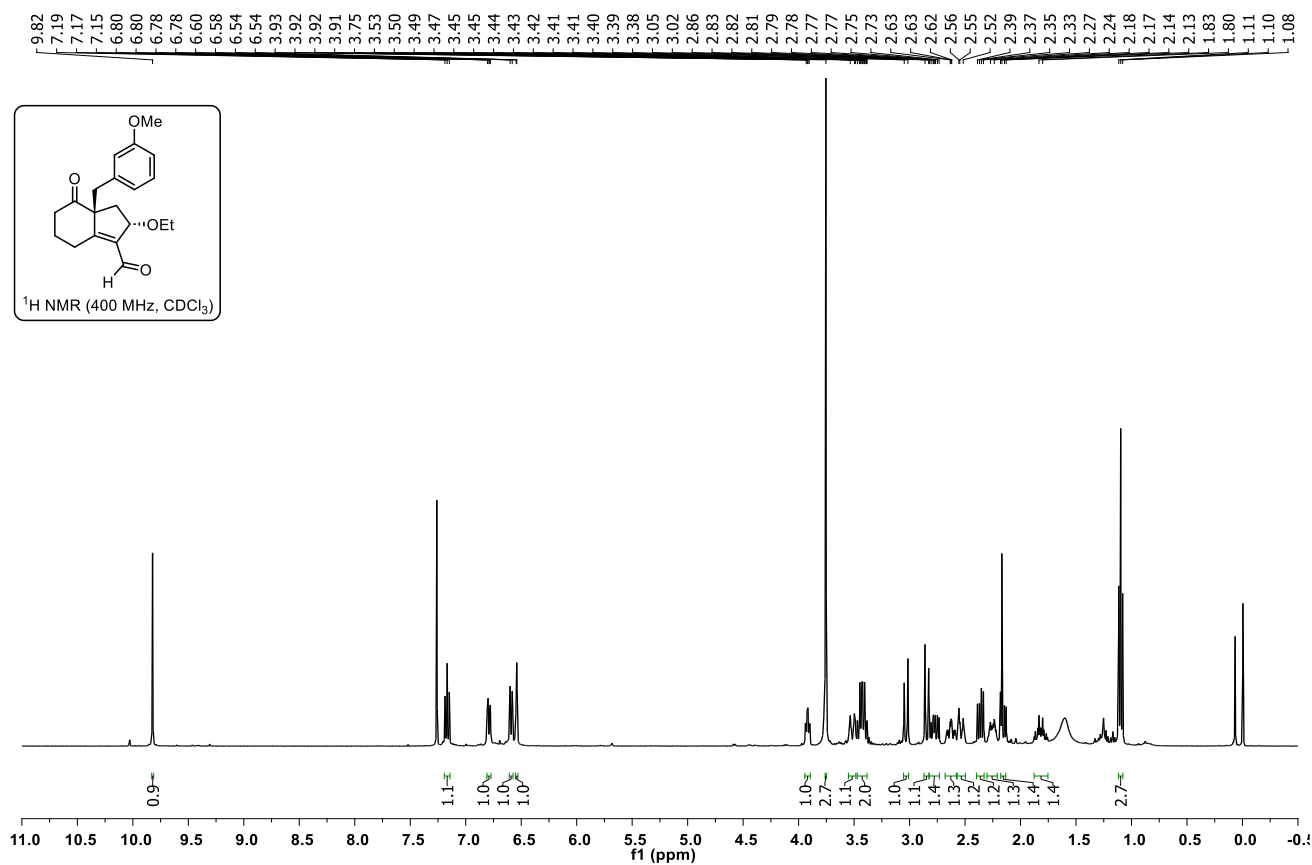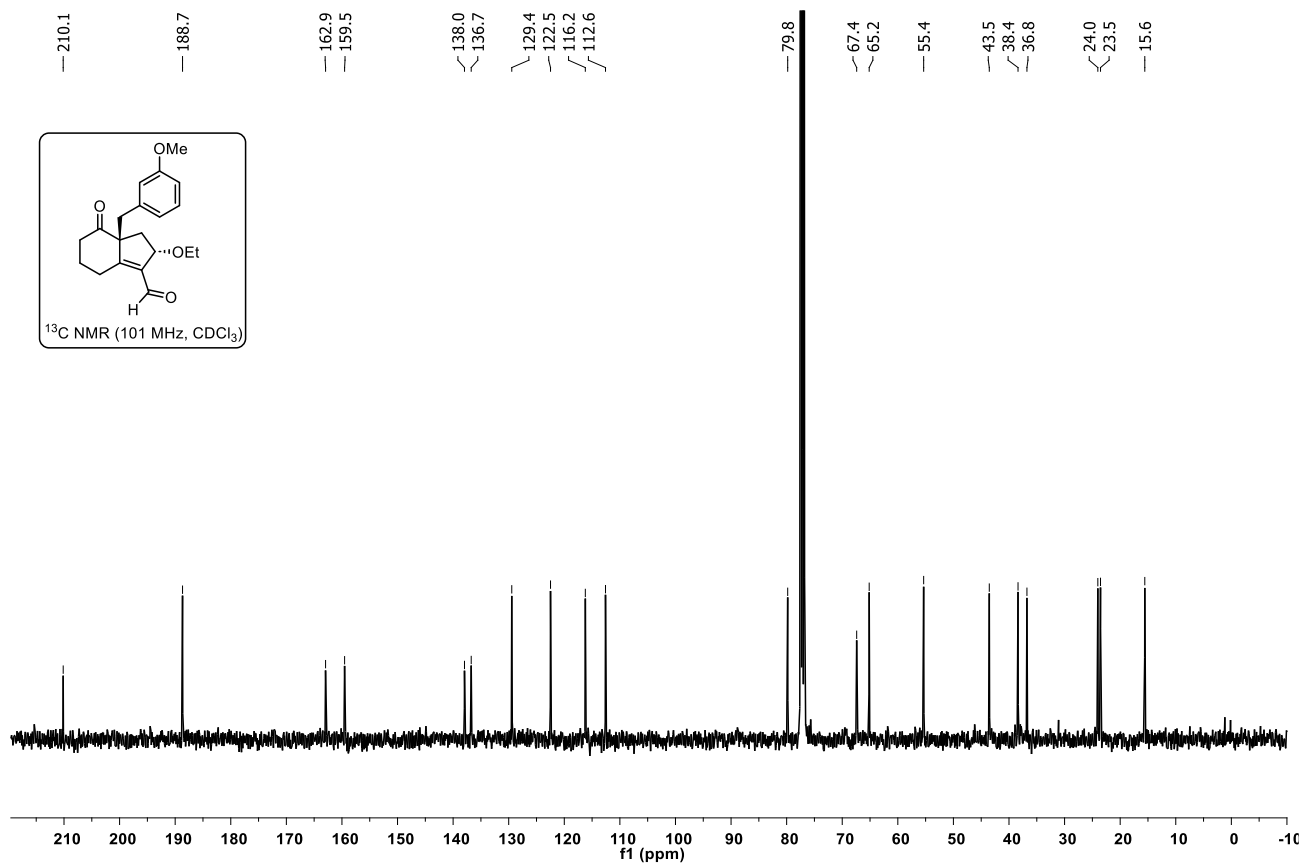

**(2*S*,7*aR*)-2-Ethoxy-7*a*-(3-fluorobenzyl)-7-oxo-2,4,5,6,7,7*a*-hexahydro-1*H*-indene-3-carbaldehyde (2o):**

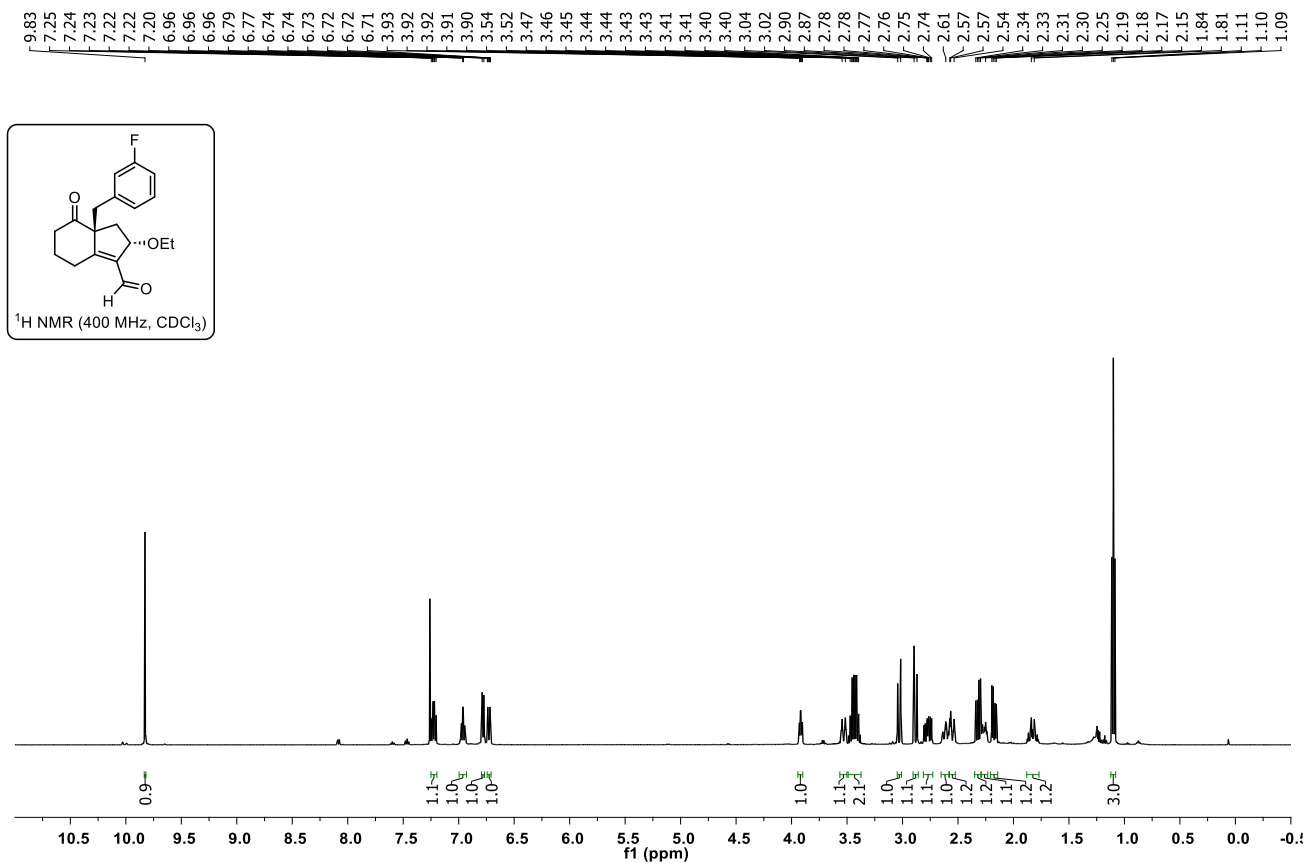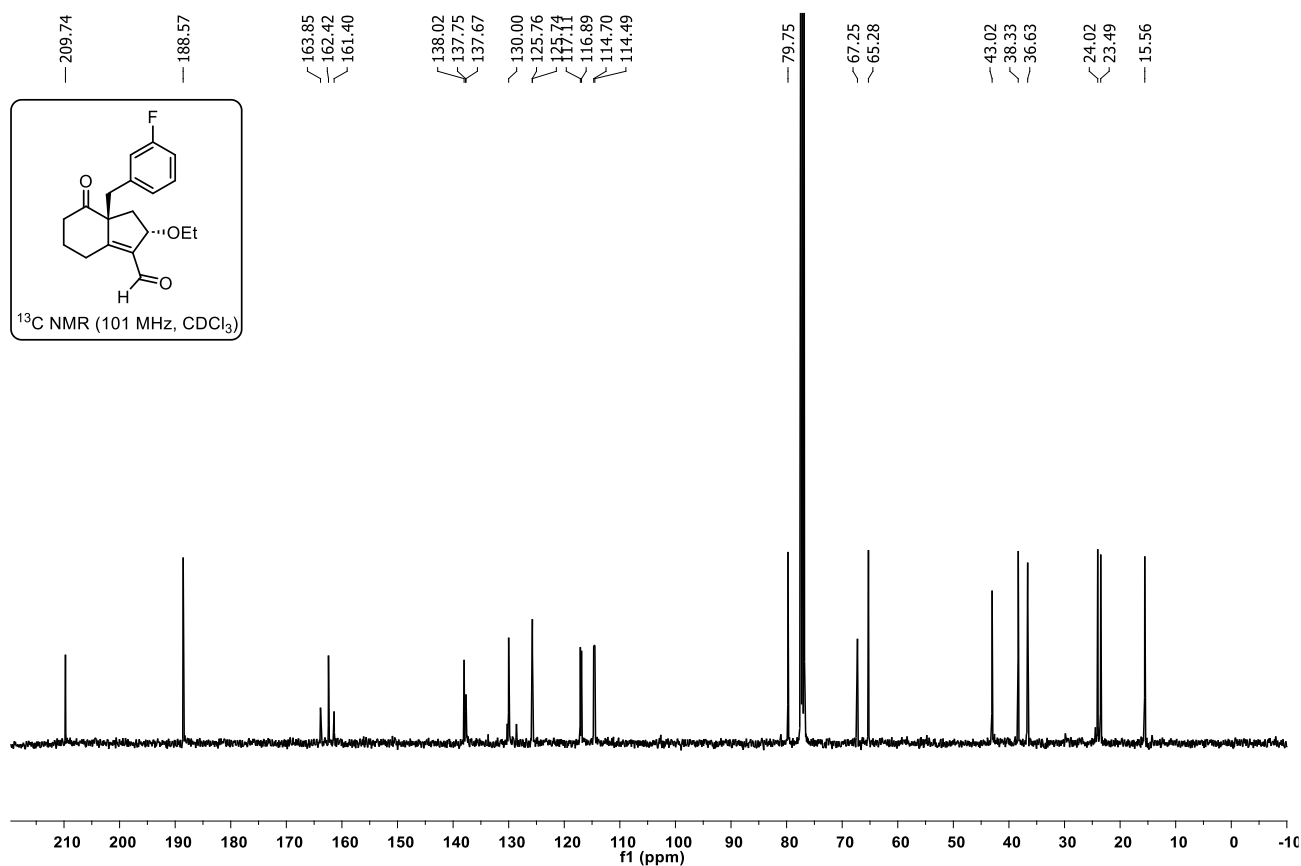

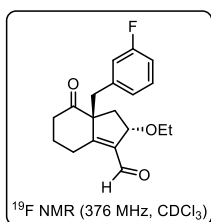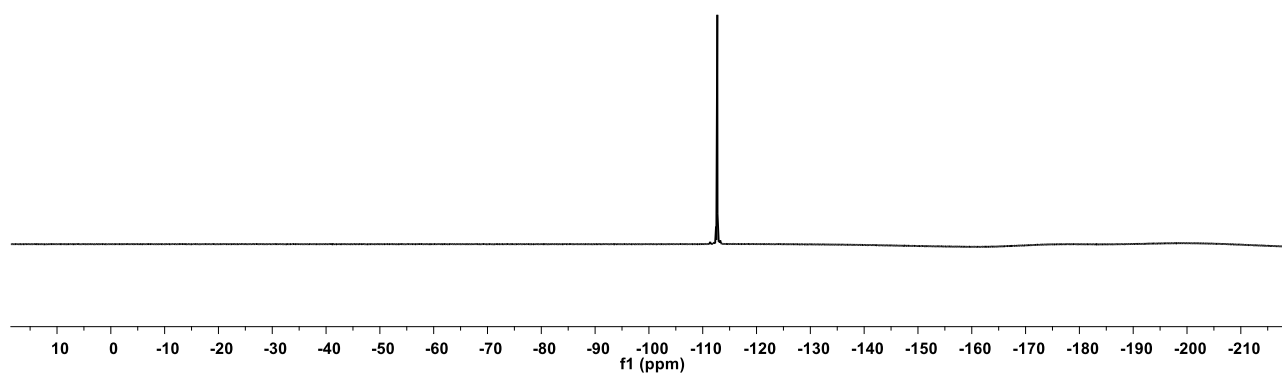

**(2*S*,7*aR*)-7*a*-(3-Chlorobenzyl)-2-ethoxy-7-oxo-2,4,5,6,7*a*-hexahydro-1*H*-indene-3-carbaldehyde (2p):**

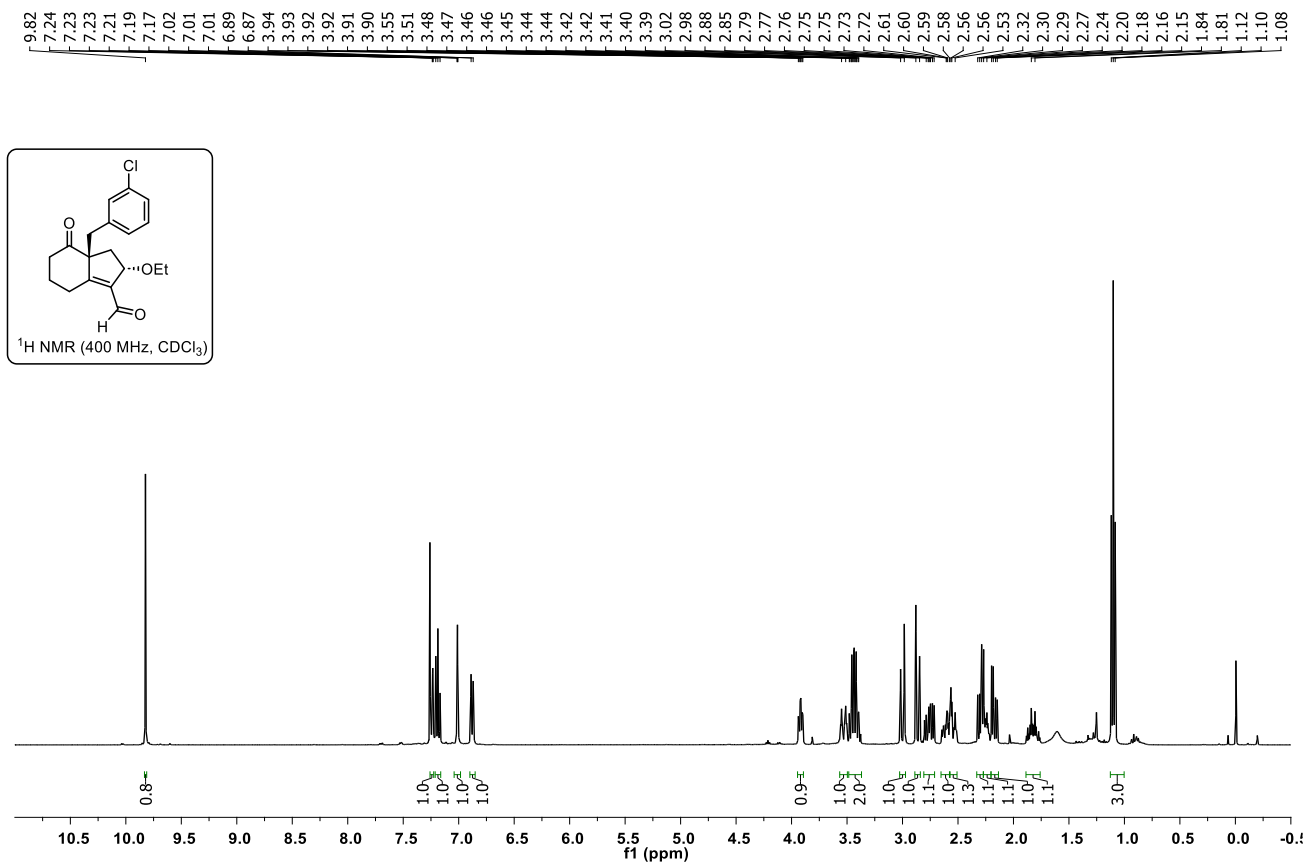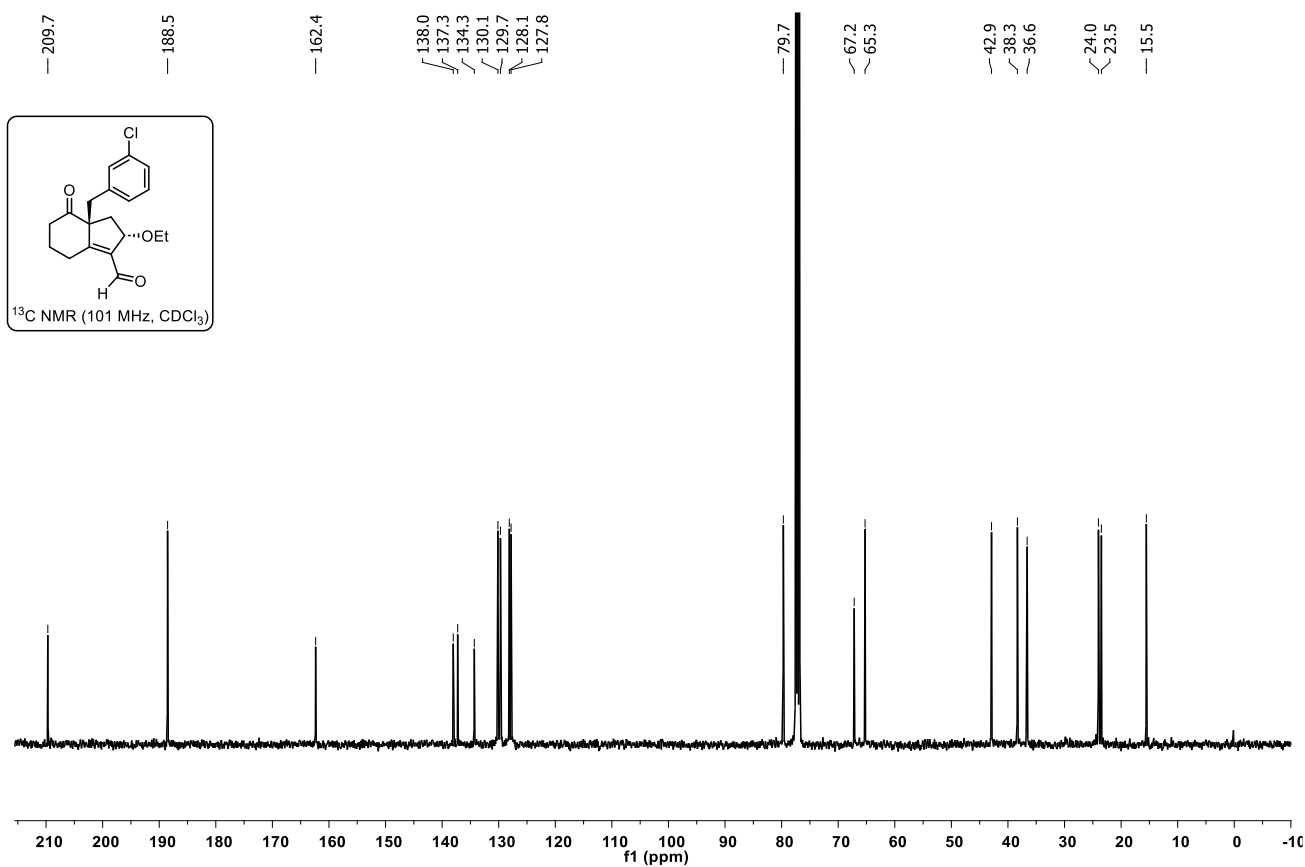

**(2*S*,7*aR*)-7a-(3-Bromobenzyl)-2-ethoxy-7-oxo-2,4,5,6,7,7a-hexahydro-1*H*-indene-3-carbaldehyde (2q):**

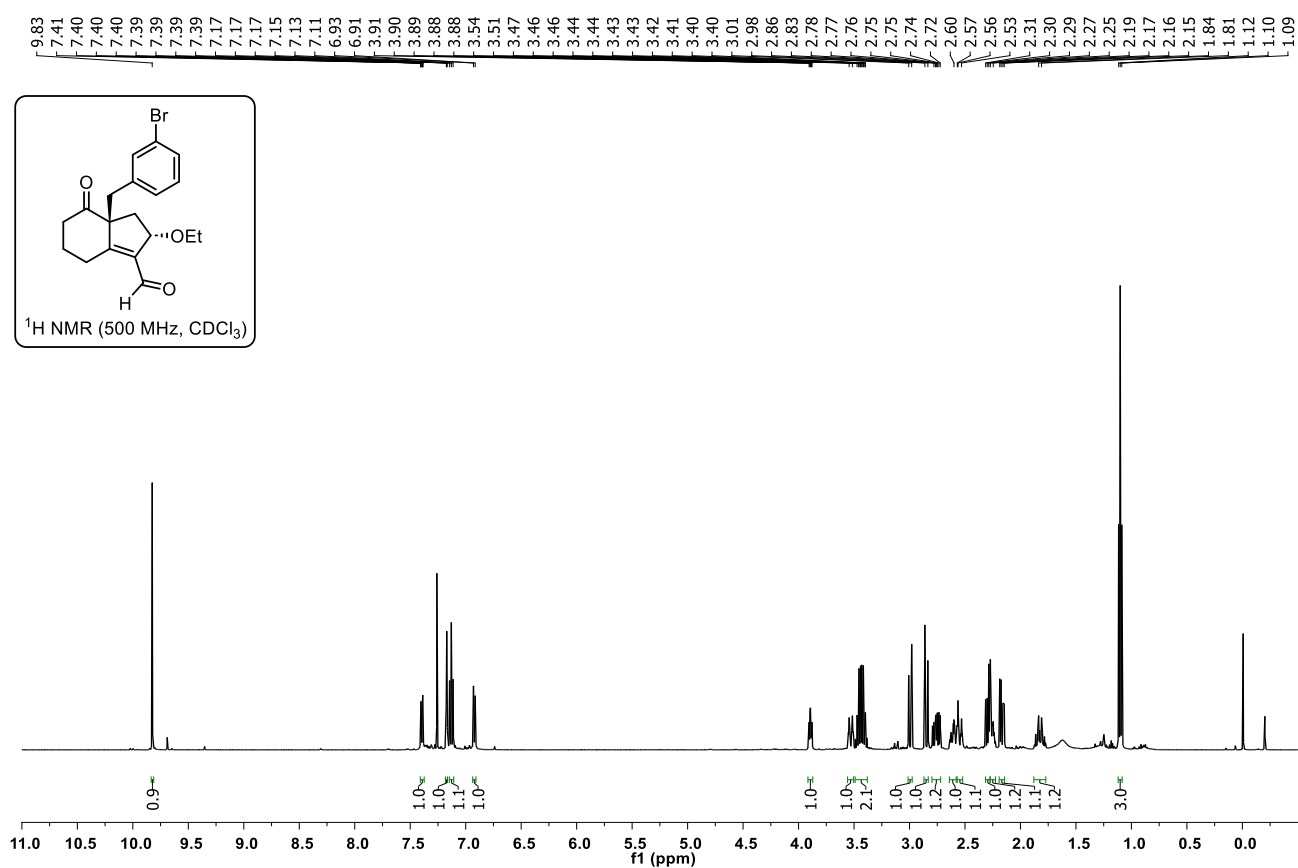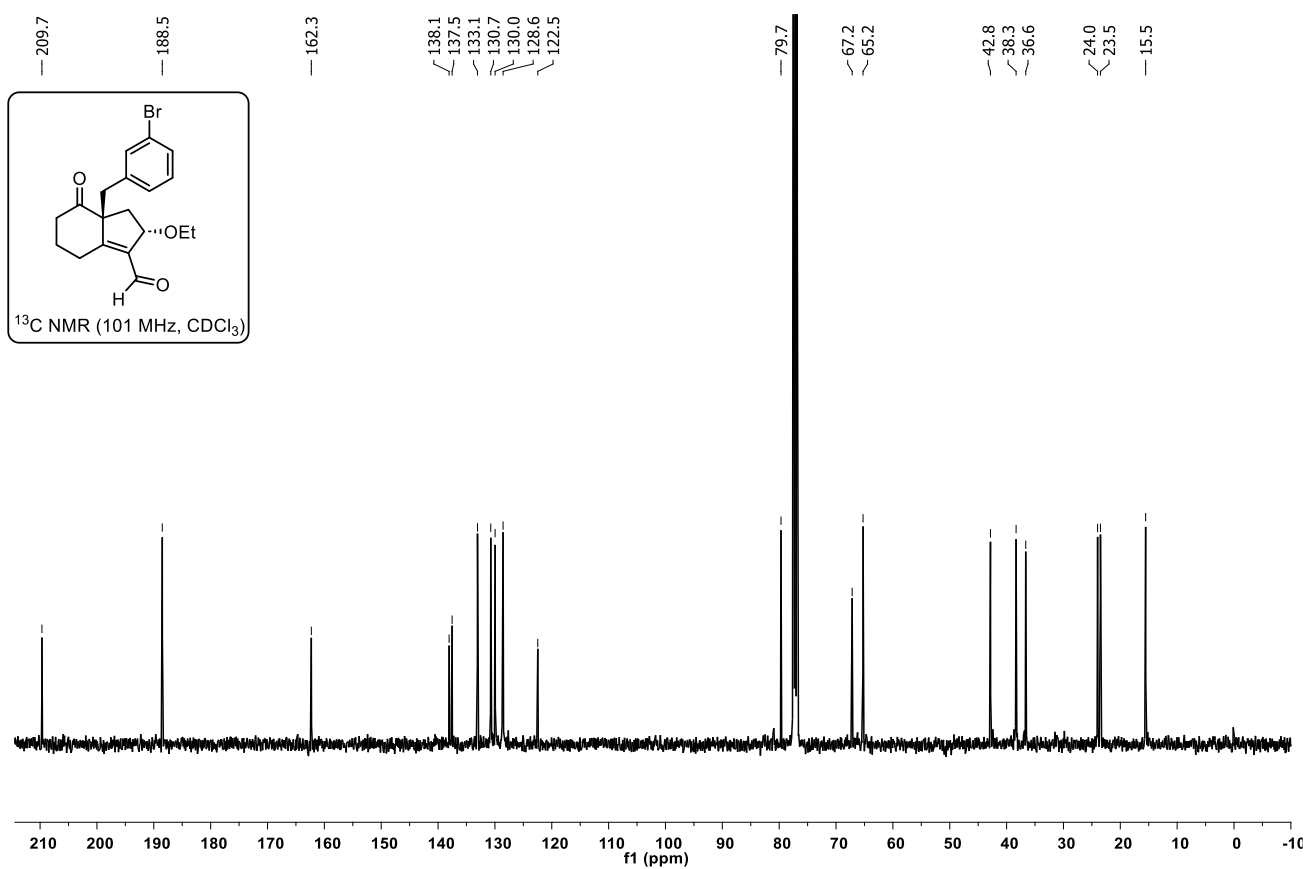

**(2*S*,7*aR*)-2-Ethoxy-7*a*-(3-nitrobenzyl)-7-oxo-2,4,5,6,7,7*a*-hexahydro-1*H*-indene-3-carbaldehyde (2r):**

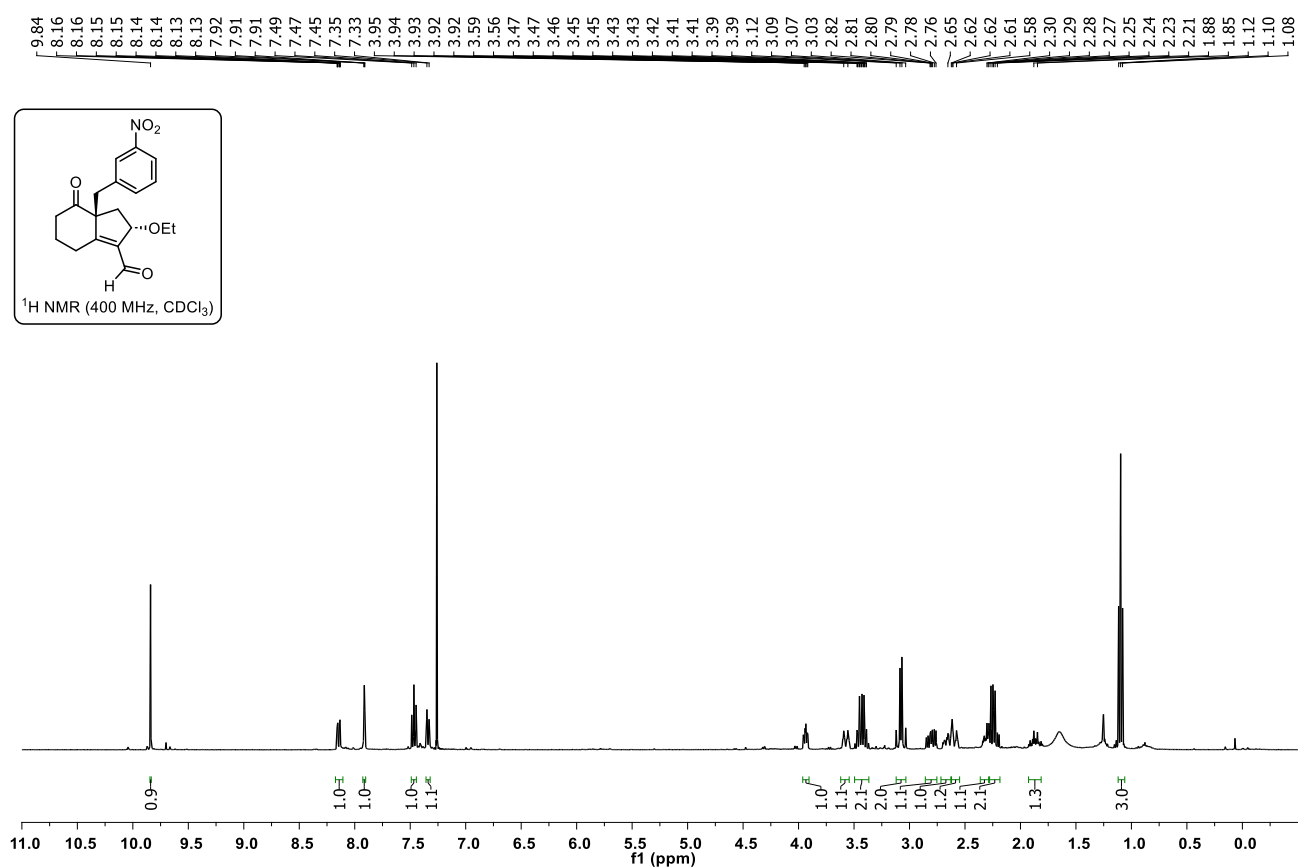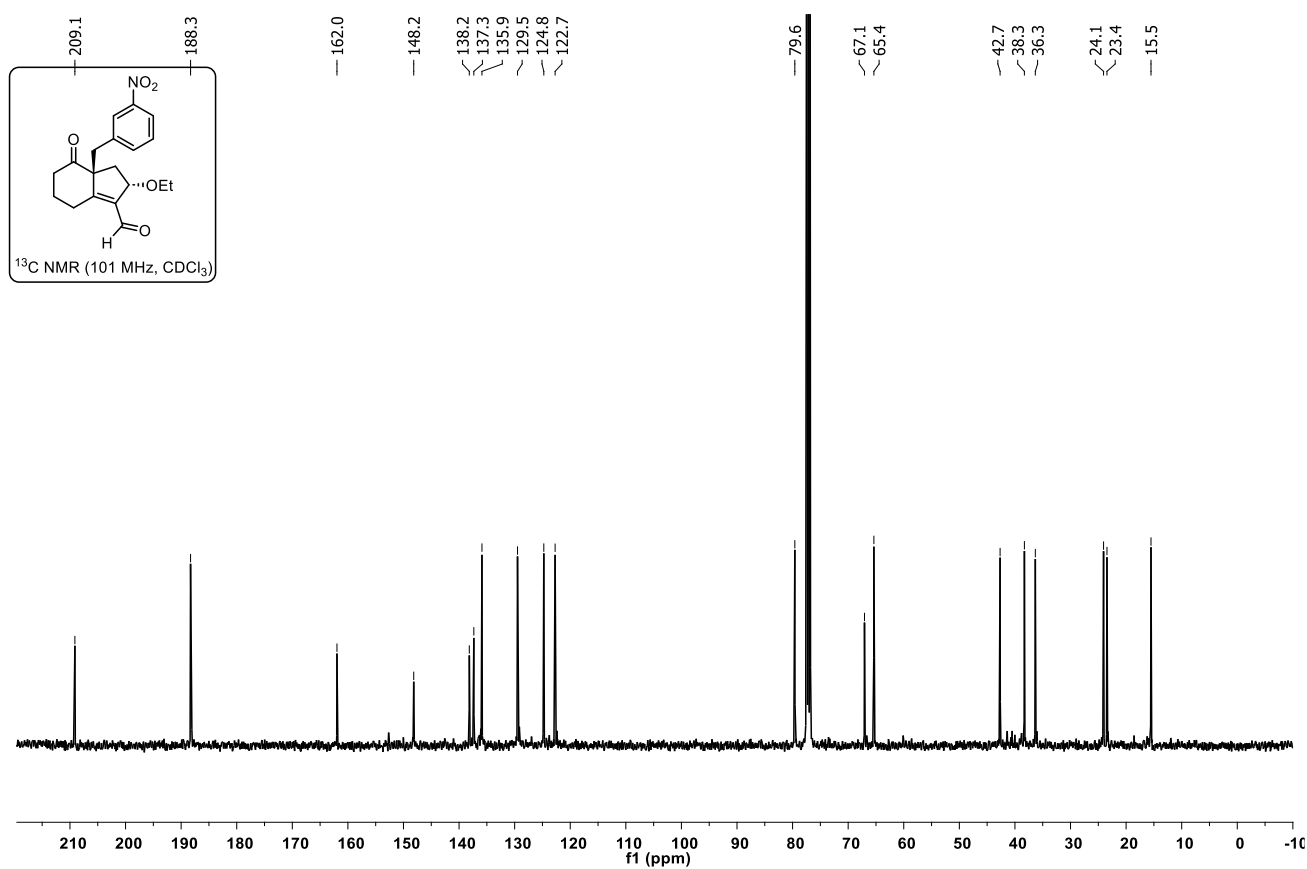

**(2*S*,7*aR*)-7a-(2-Chlorobenzyl)-2-ethoxy-7-oxo-2,4,5,6,7,7a-hexahydro-1*H*-indene-3-carbaldehyde (2*s*):**

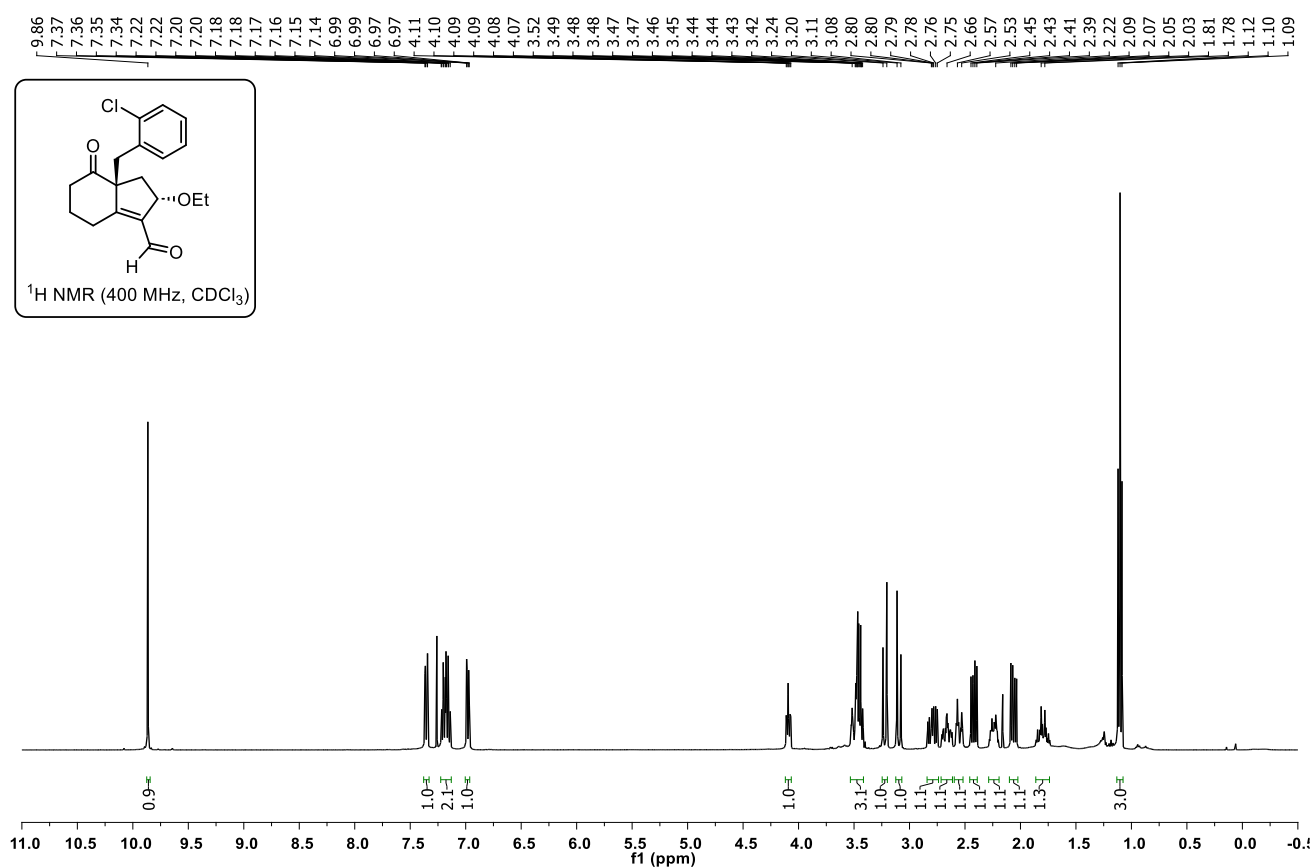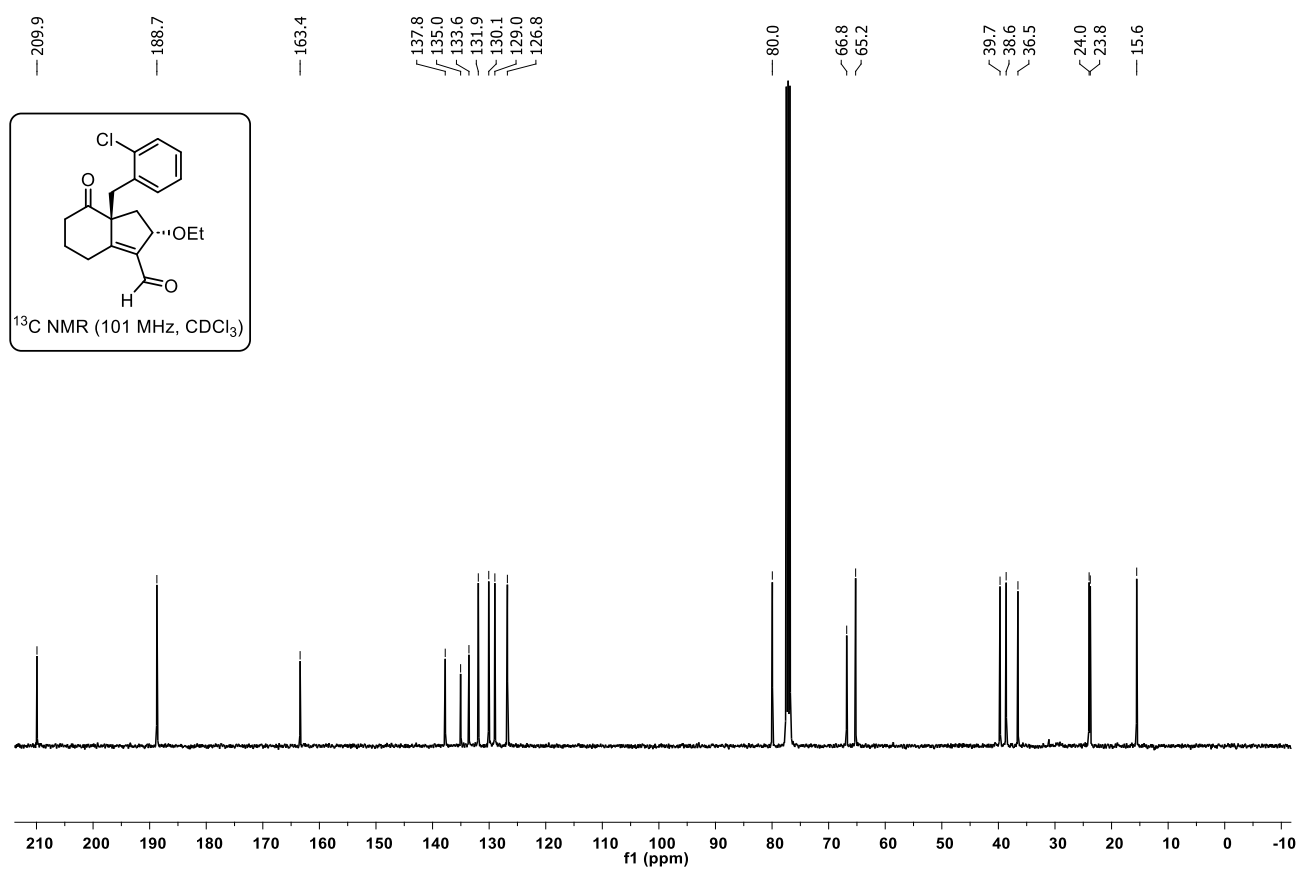

**(2*S*,7*aR*)-7*a*-(2-Bromobenzyl)-2-ethoxy-7-oxo-2,4,5,6,7,7*a*-hexahydro-1*H*-indene-3-carbaldehyde (2t):**

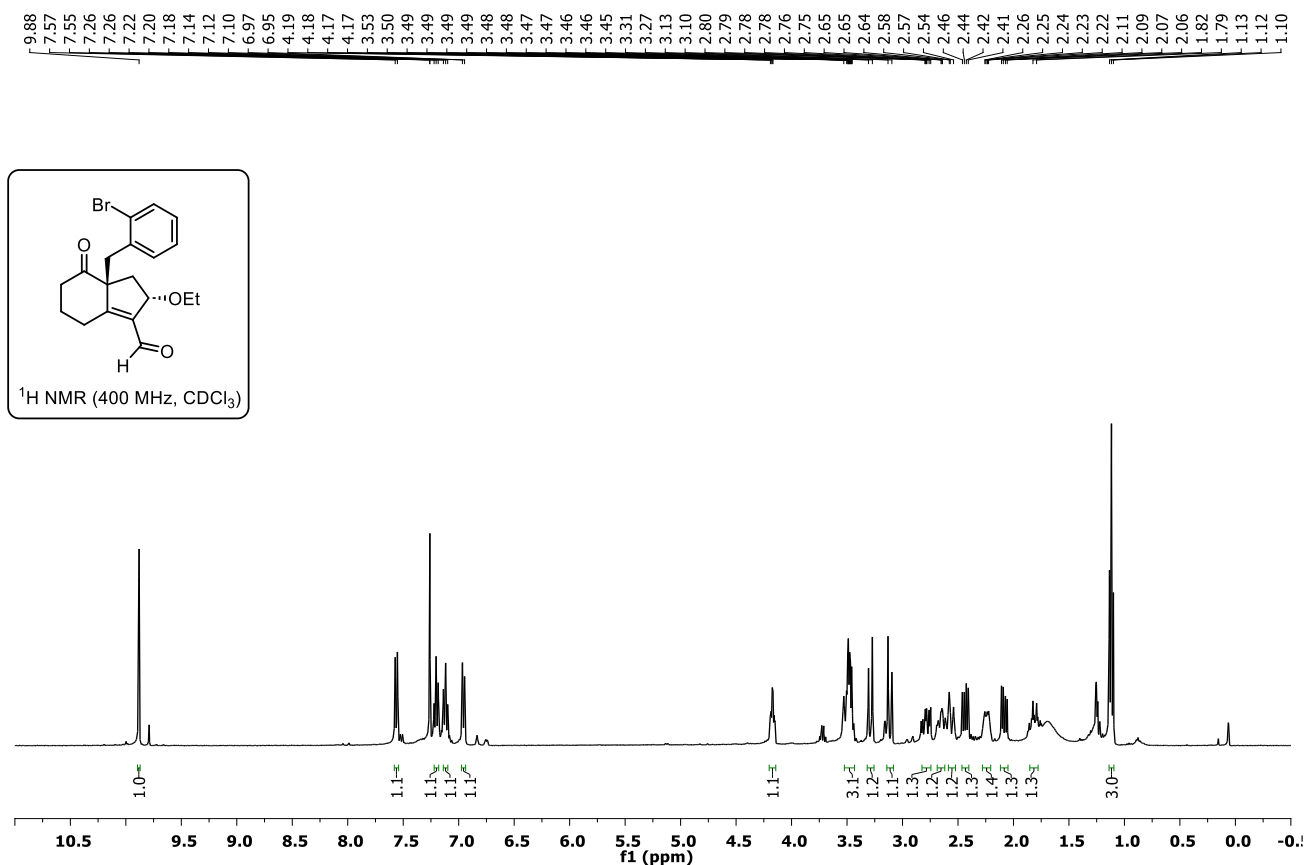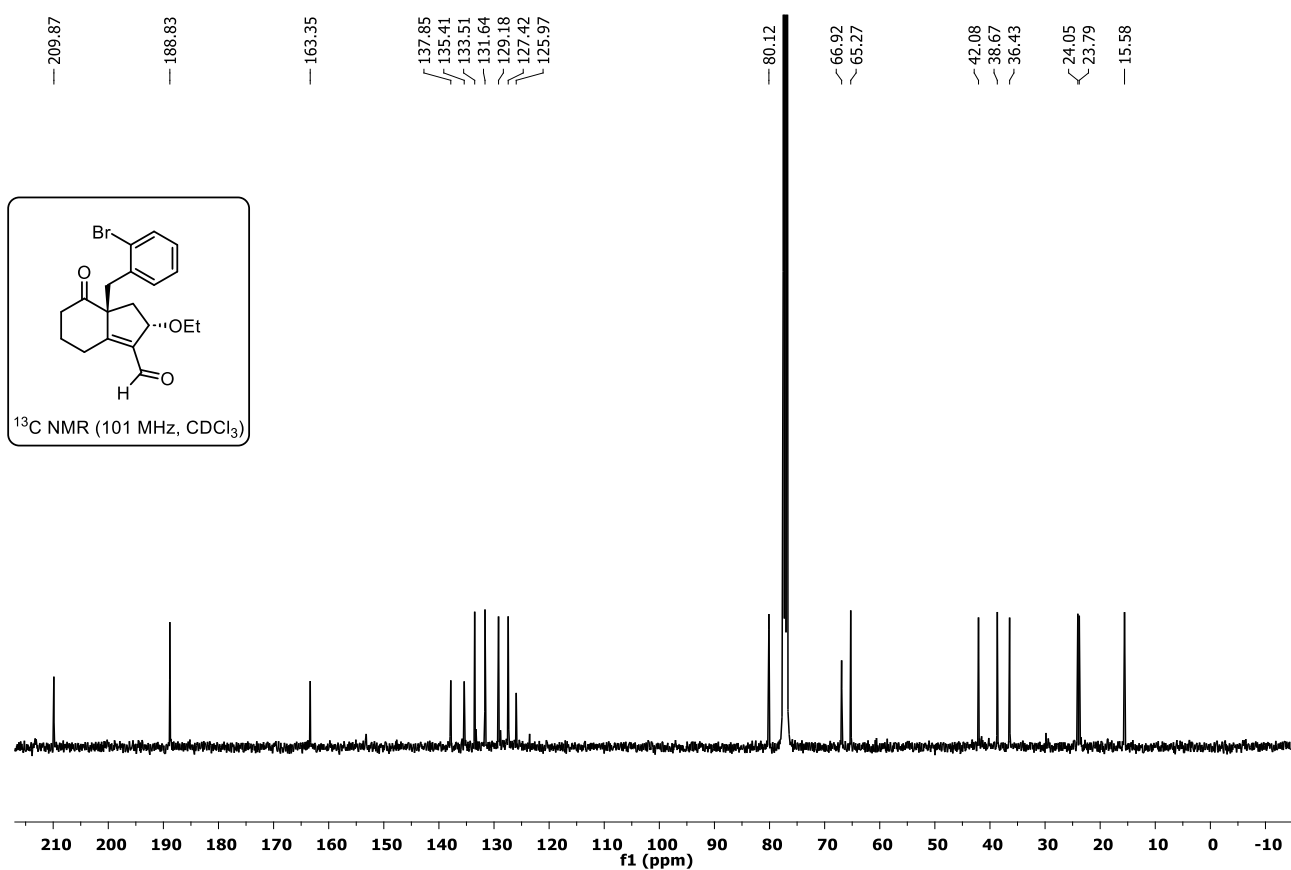

**(2*S*,7*aR*)-7a-(3,4-Dimethoxybenzyl)-2-ethoxy-7-oxo-2,4,5,6,7,7a-hexahydro-1*H*-indene-3-carbaldehyde (2u):**

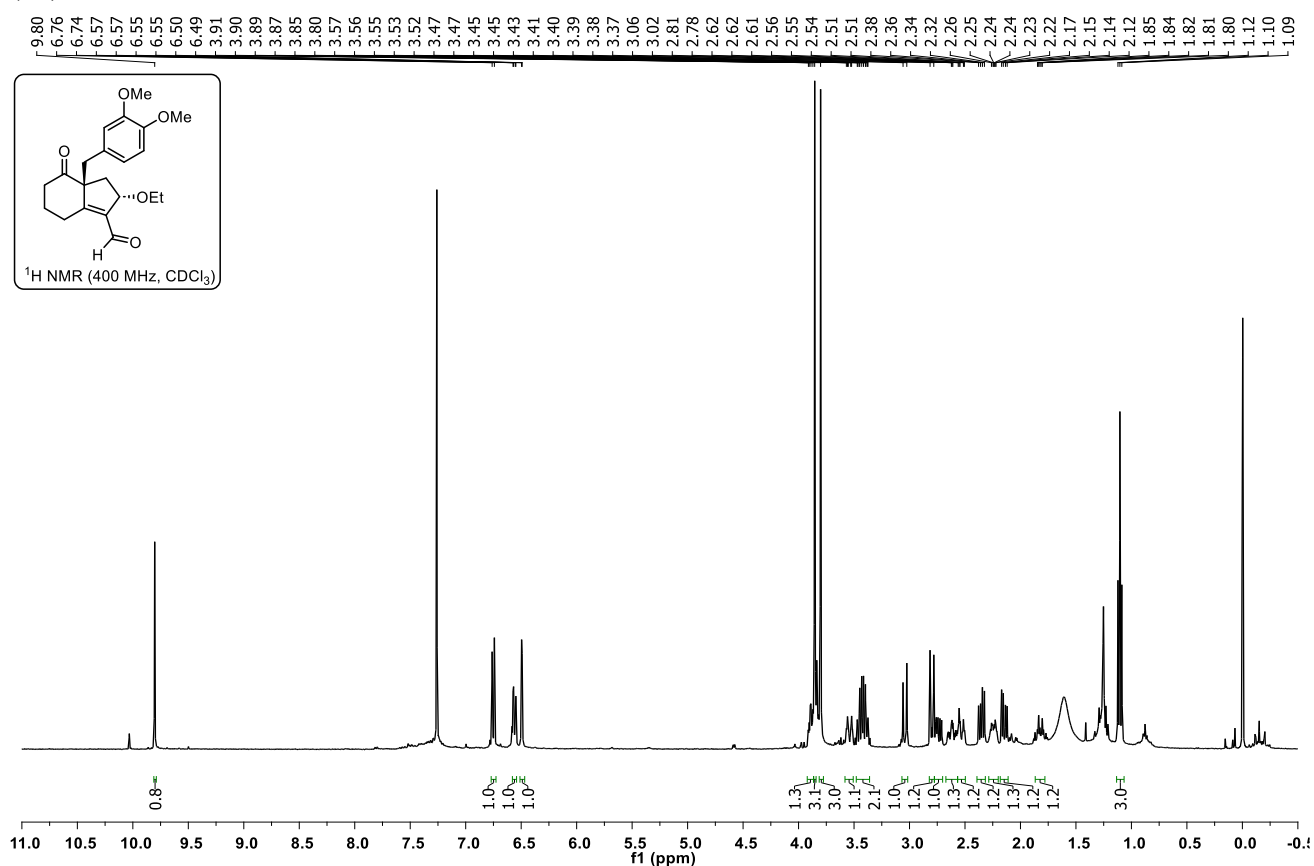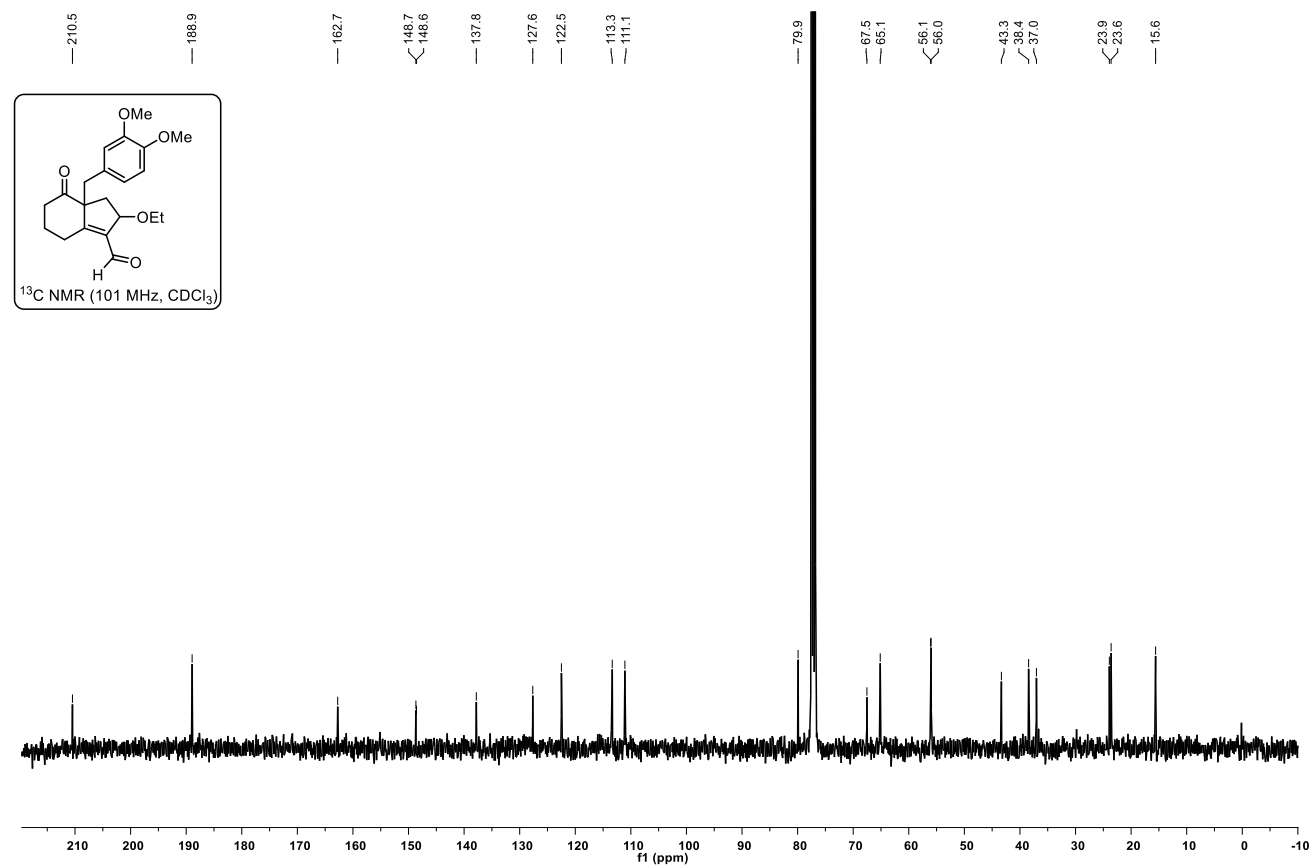

**(2*S*,7*aR*)-7a-(2,3-Dichlorobenzyl)-2-ethoxy-7-oxo-2,4,5,6,7,7a-hexahydro-1*H*-indene-3-carbaldehyde (2*v*):**

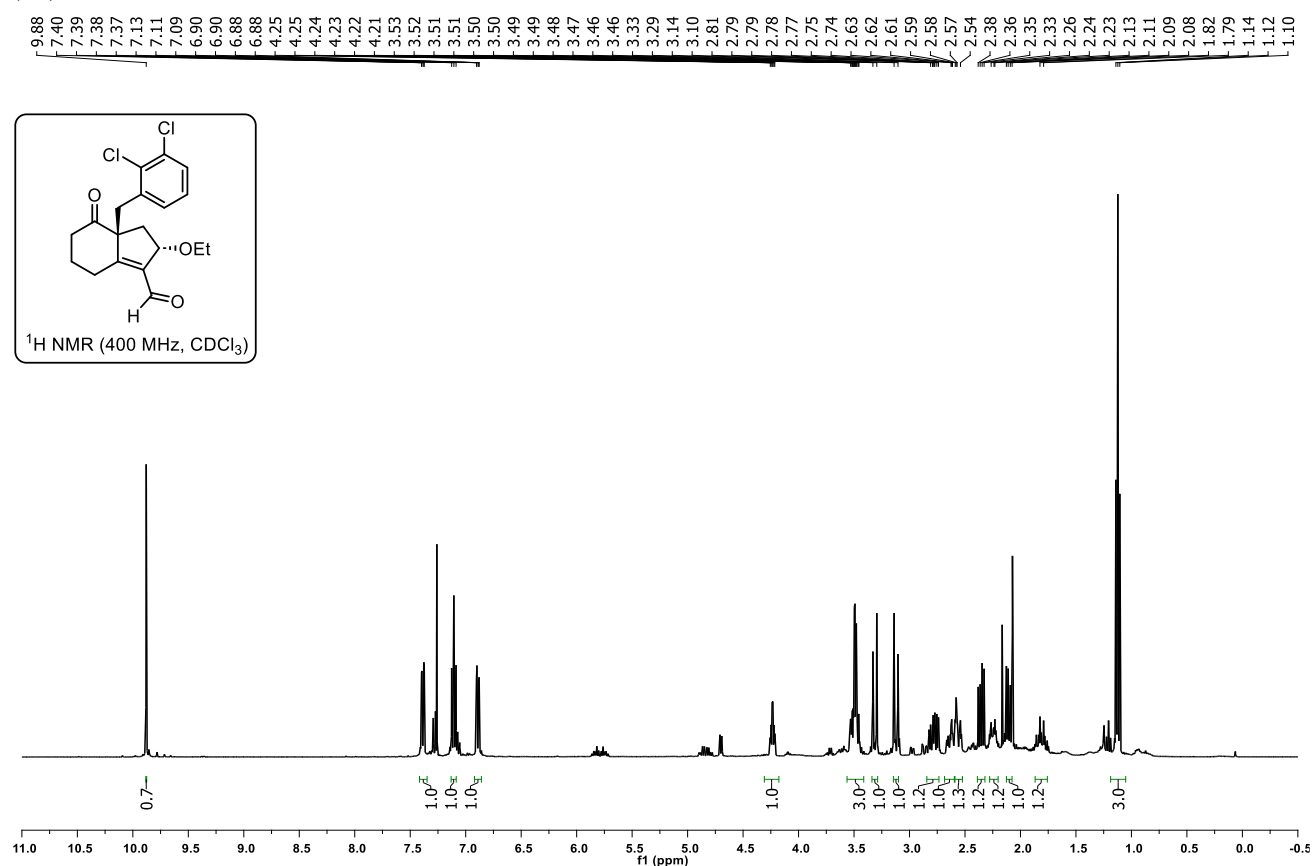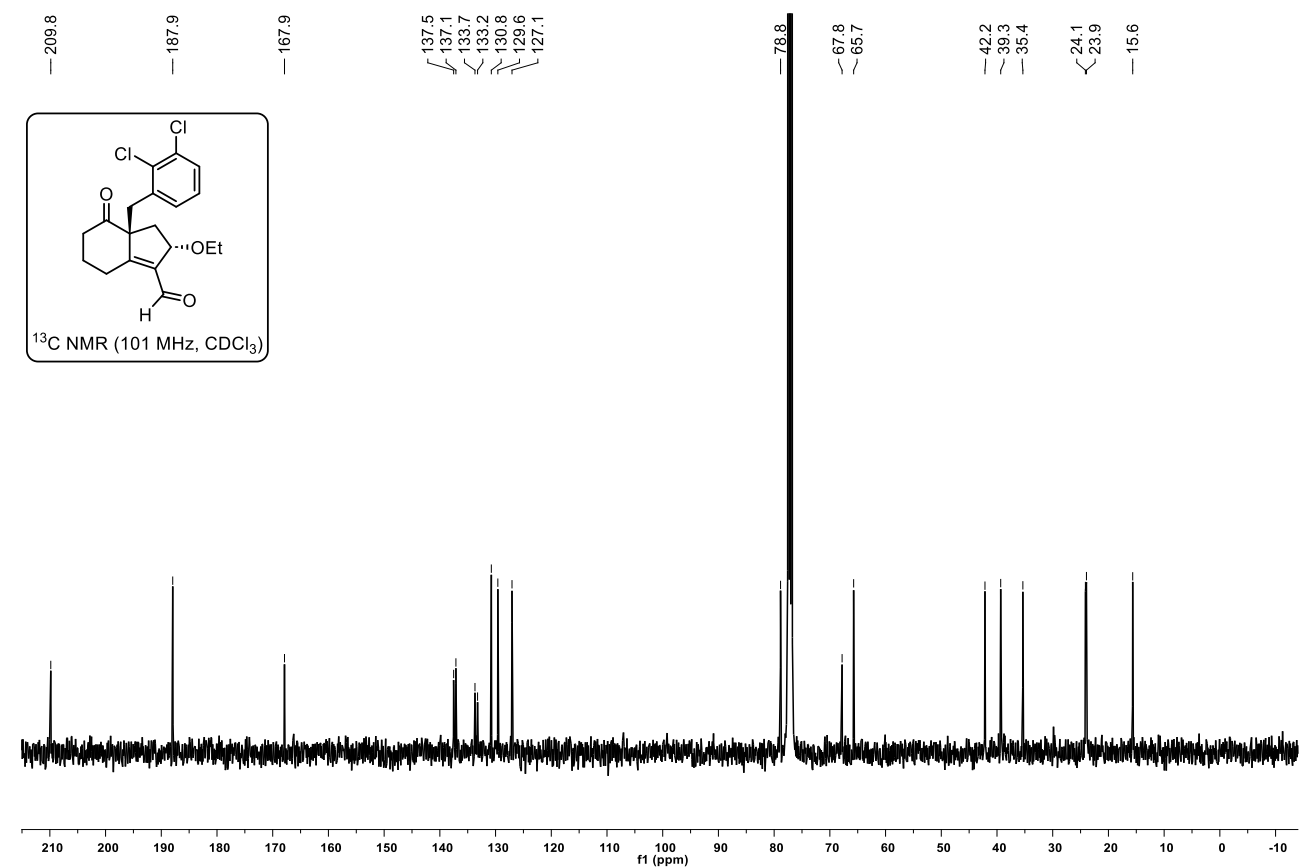

**(2*S*,7*aR*)-2-Ethoxy-7*a*-(naphthalen-1-ylmethyl)-7-oxo-2,4,5,6,7,7*a*-hexahydro-1*H*-indene-3-carbaldehyde (2w):**

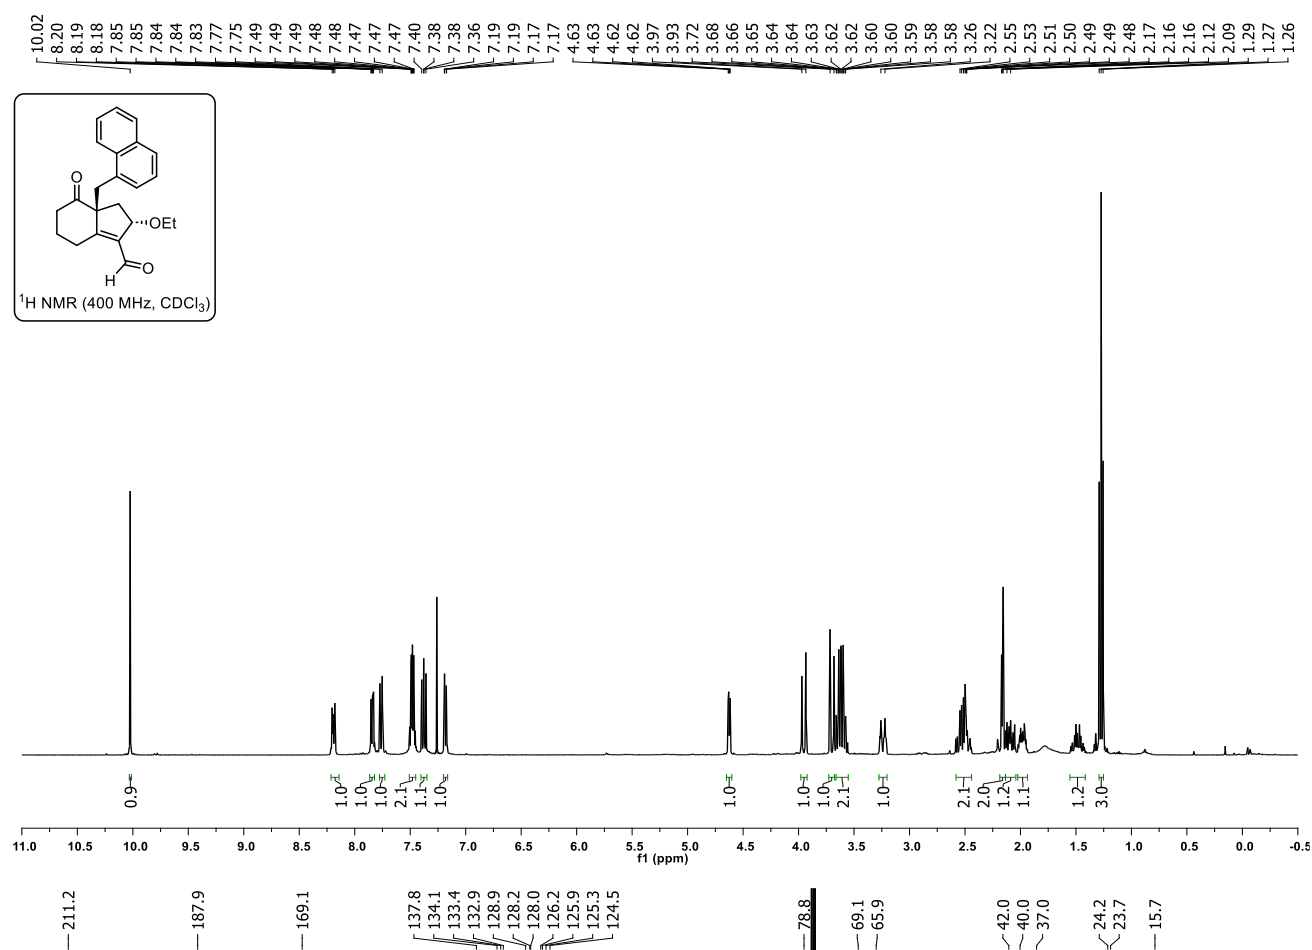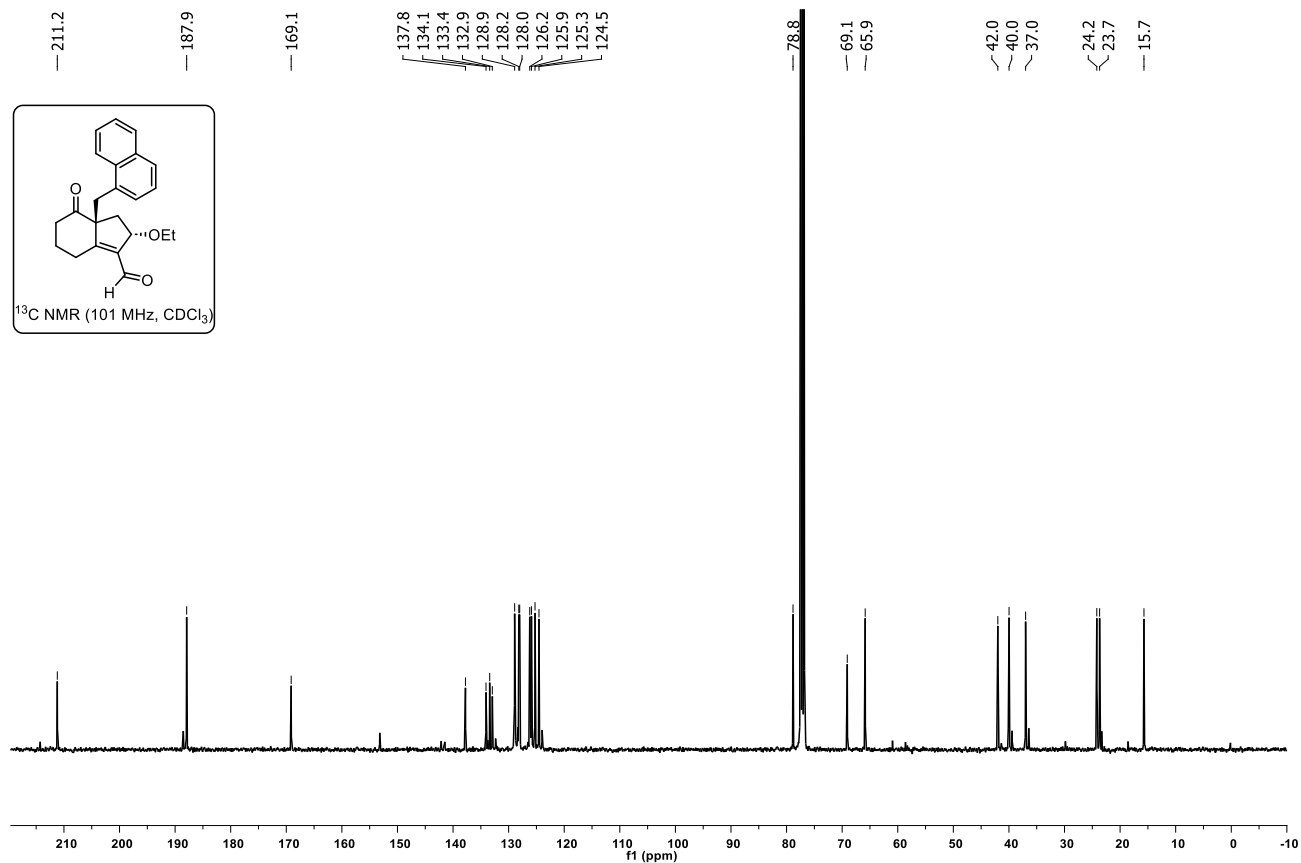

**(2*S*,7*aR*)-2-Ethoxy-7-oxo-7a-(thiophen-2-ylmethyl)-2,4,5,6,7,7a-hexahydro-1*H*-indene-3-carbaldehyde (2*x*):**

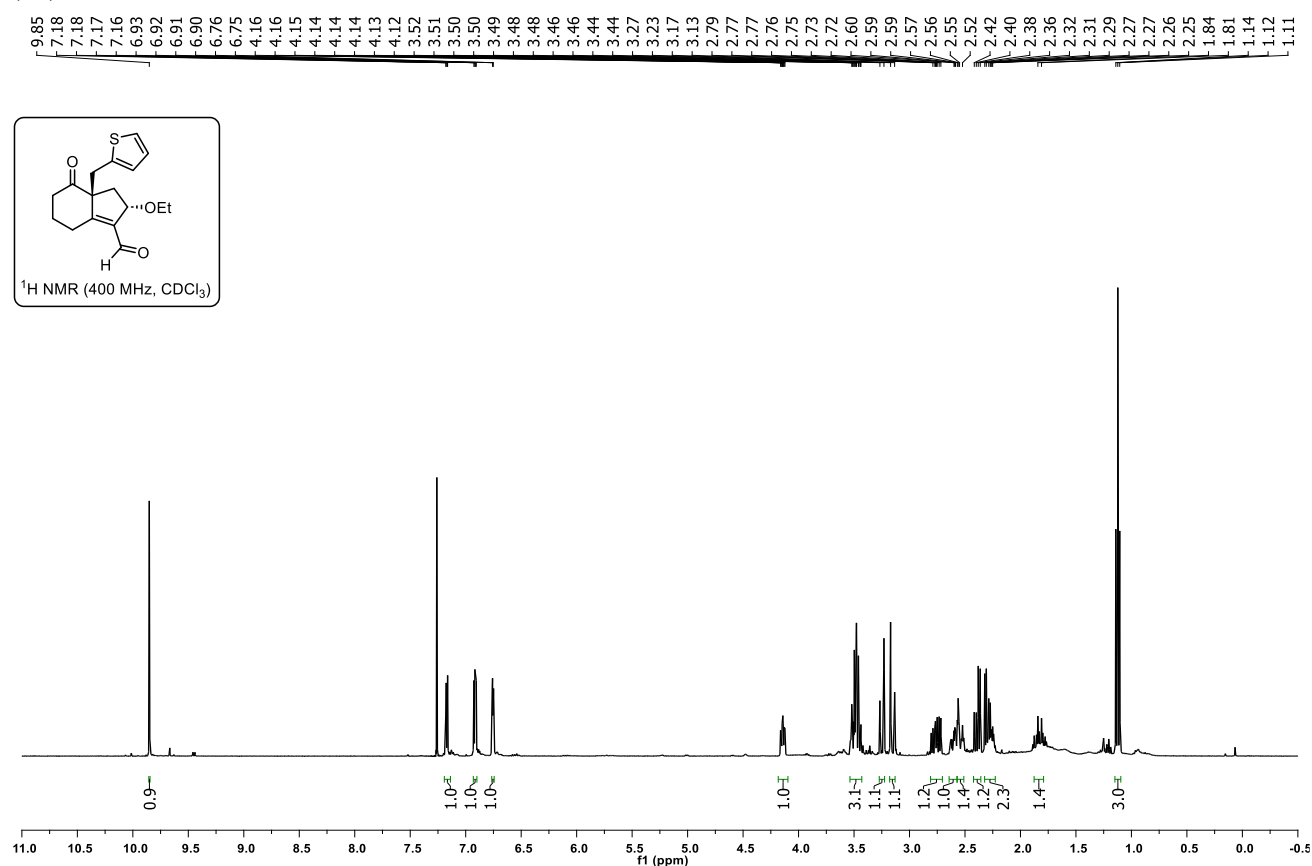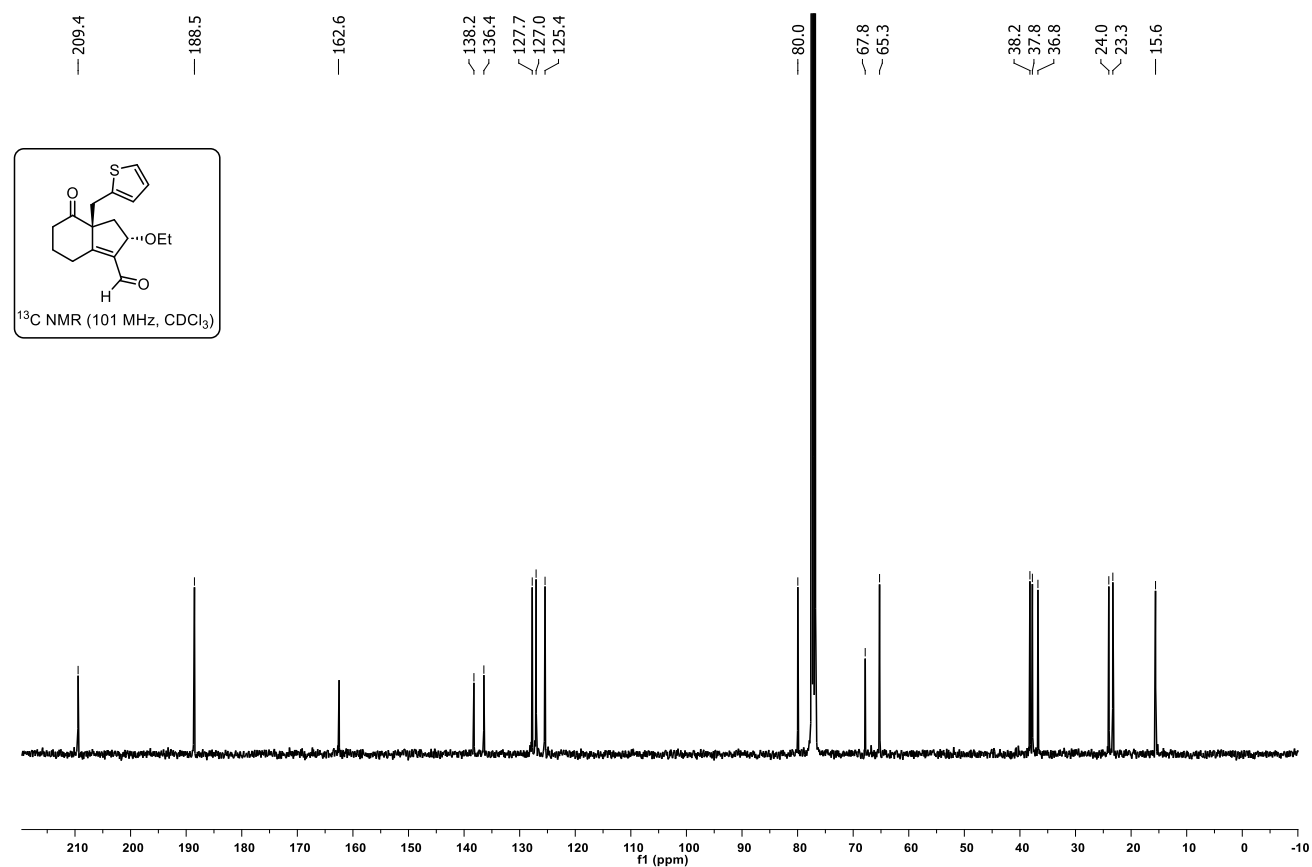

**(2*S*,7*aR*)-2-Ethoxy-7a-(furan-2-ylmethyl)-7-oxo-2,4,5,6,7,7a-hexahydro-1*H*-indene-3-carbaldehyde (2y):**

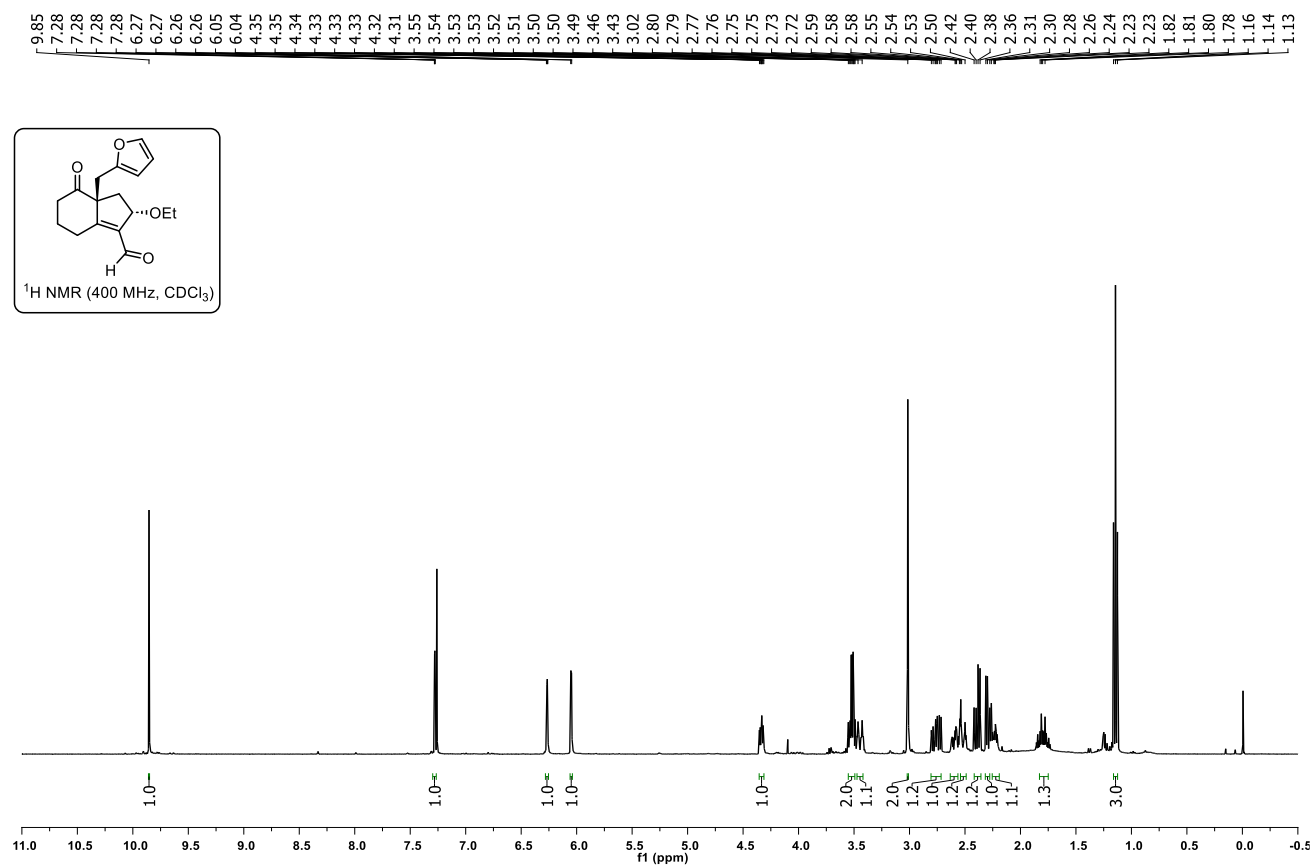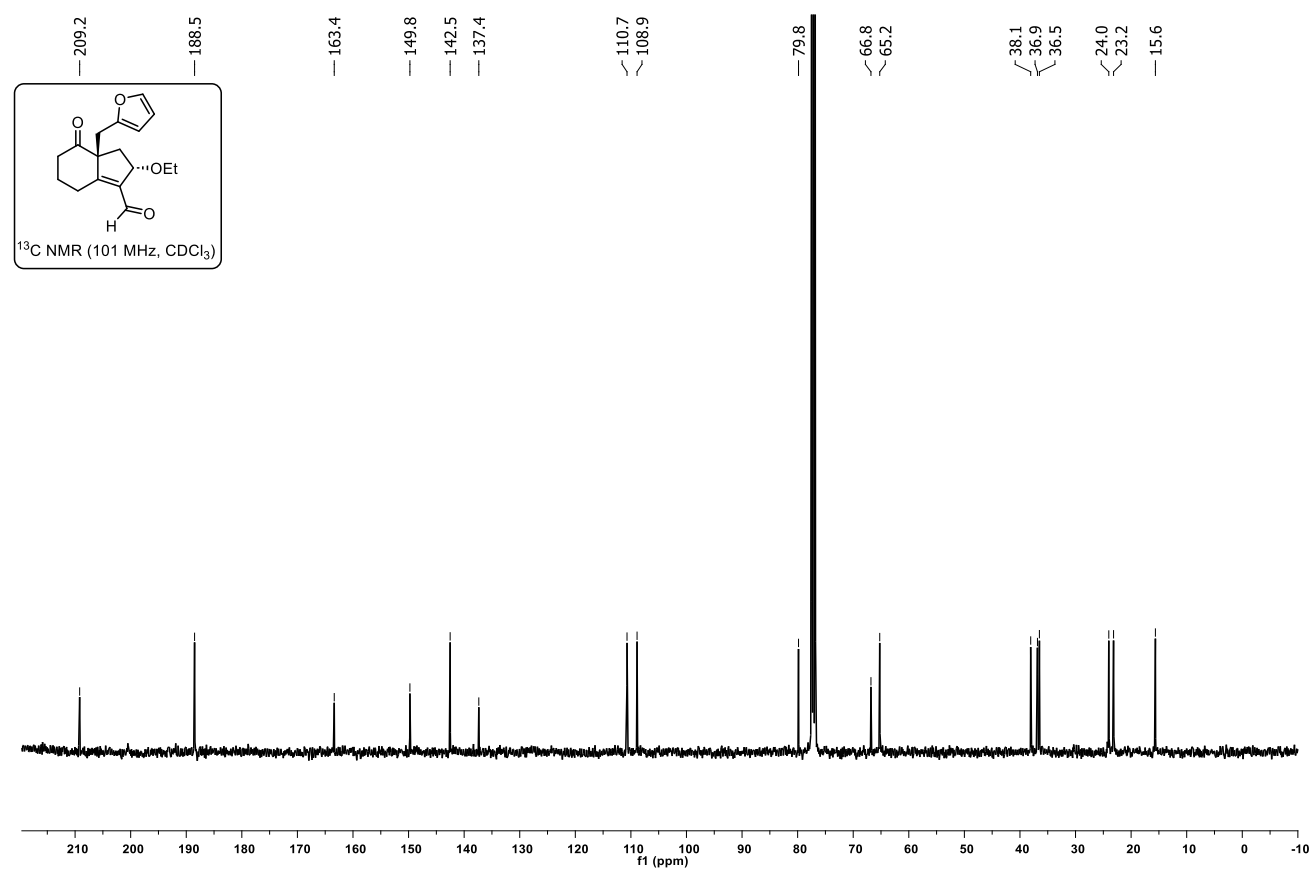

**(2*S*,3*aR*)-3*a*-Benzyl-1-((*Z*)-3-(4-bromophenyl)-3-oxoprop-1-en-1-yl)-2-ethoxy-2,3,3*a*,5,6,7-hexahydro-4*H*-inden-4-one (5):**

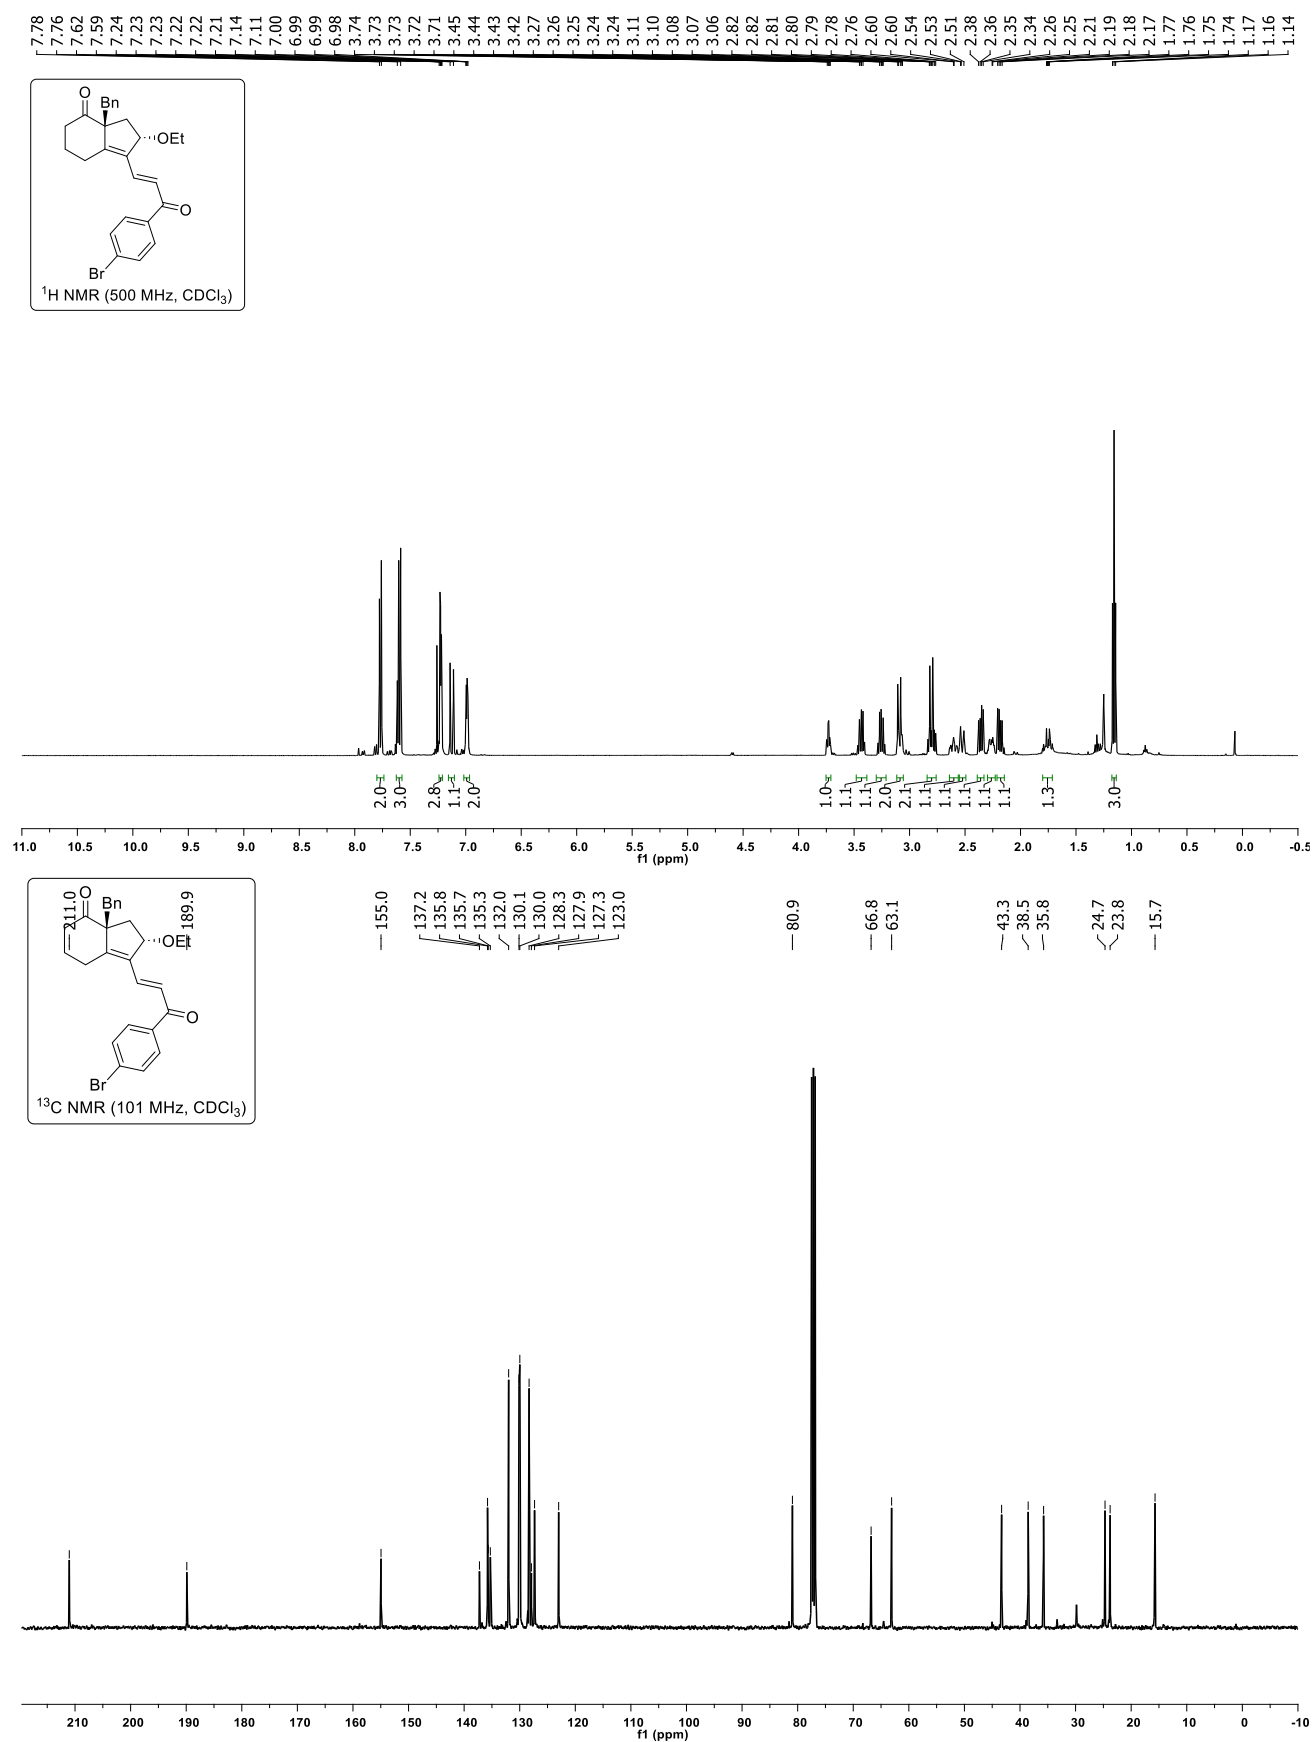

**Ethyl (*E*)-3-((2*S*,7*aR*)-7*a*-benzyl-2-ethoxy-7-oxo-2,4,5,6,7,7*a*-hexahydro-1*H*-inden-3-yl)acrylate(6):**

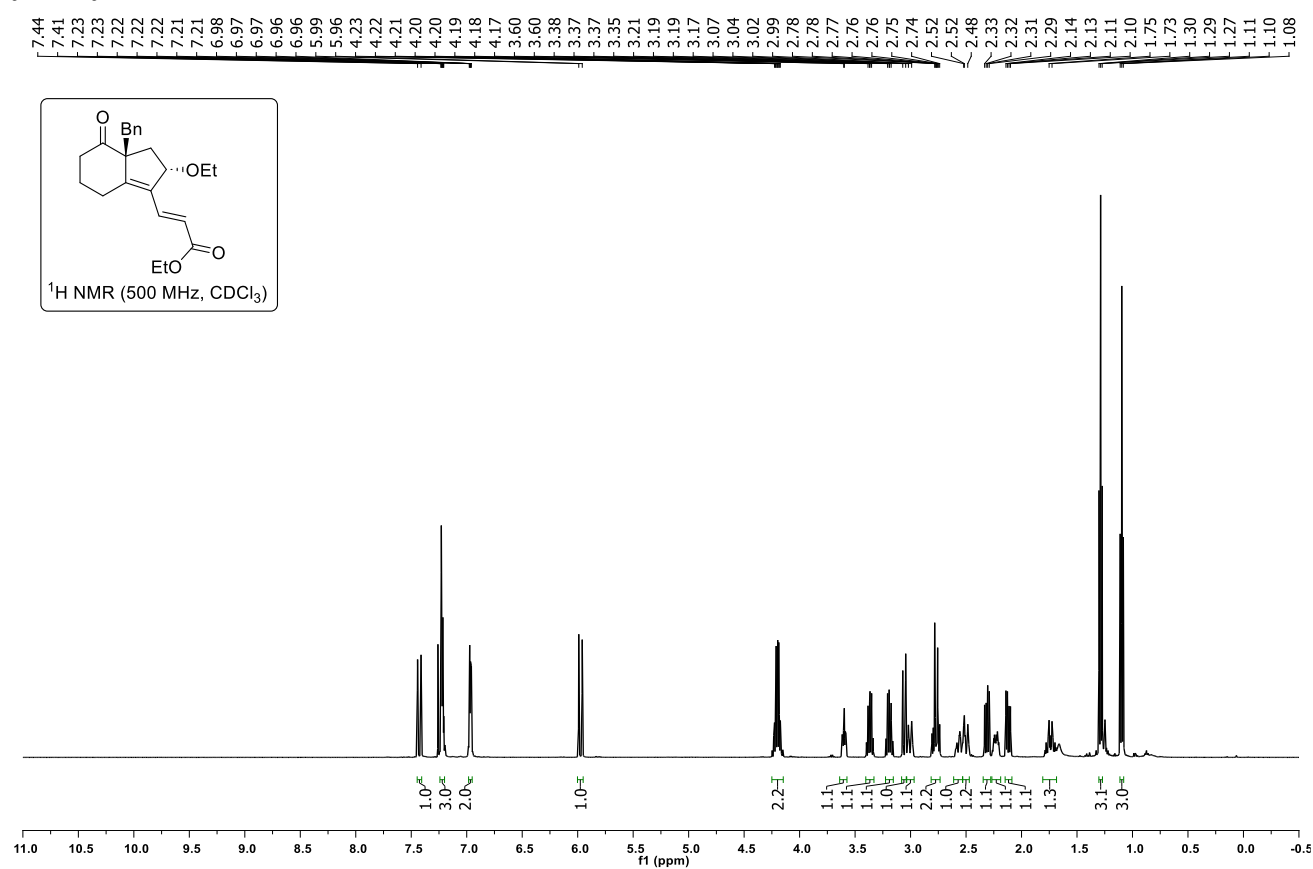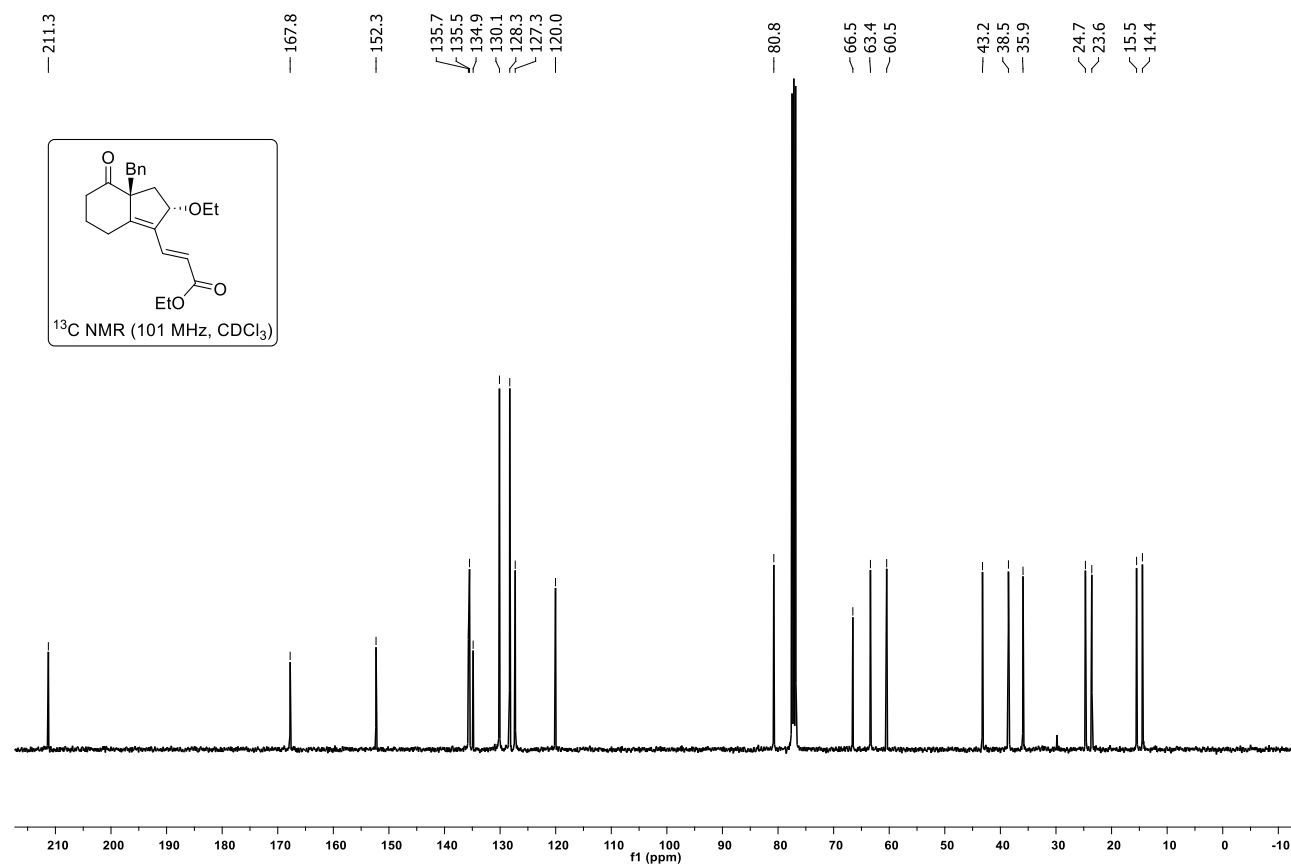

**(2*S*,3*aR*)-3*a*-Benzyl-2-ethoxy-1-(hydroxymethyl)-2,3,3*a*,5,6,7-hexahydro-4*H*-inden-4-one (7):**

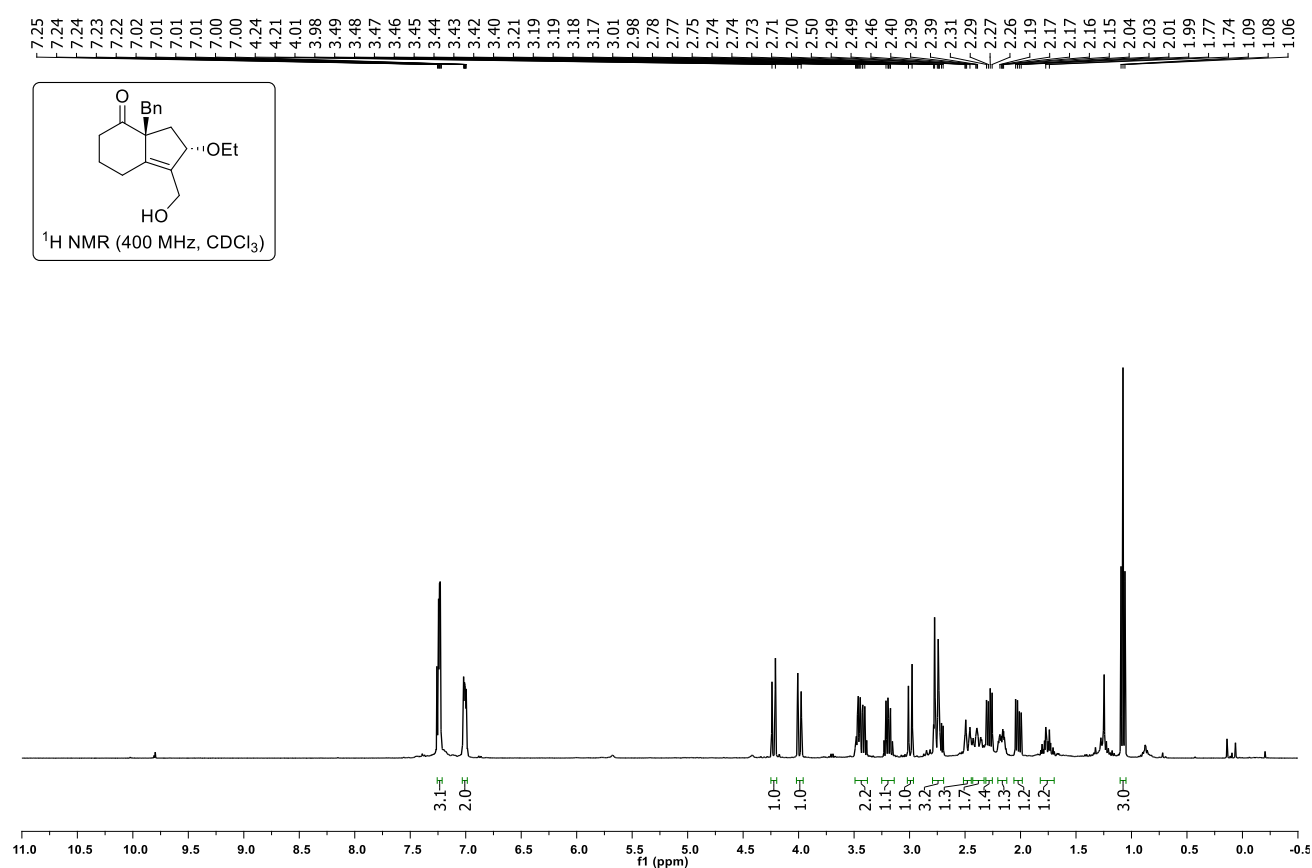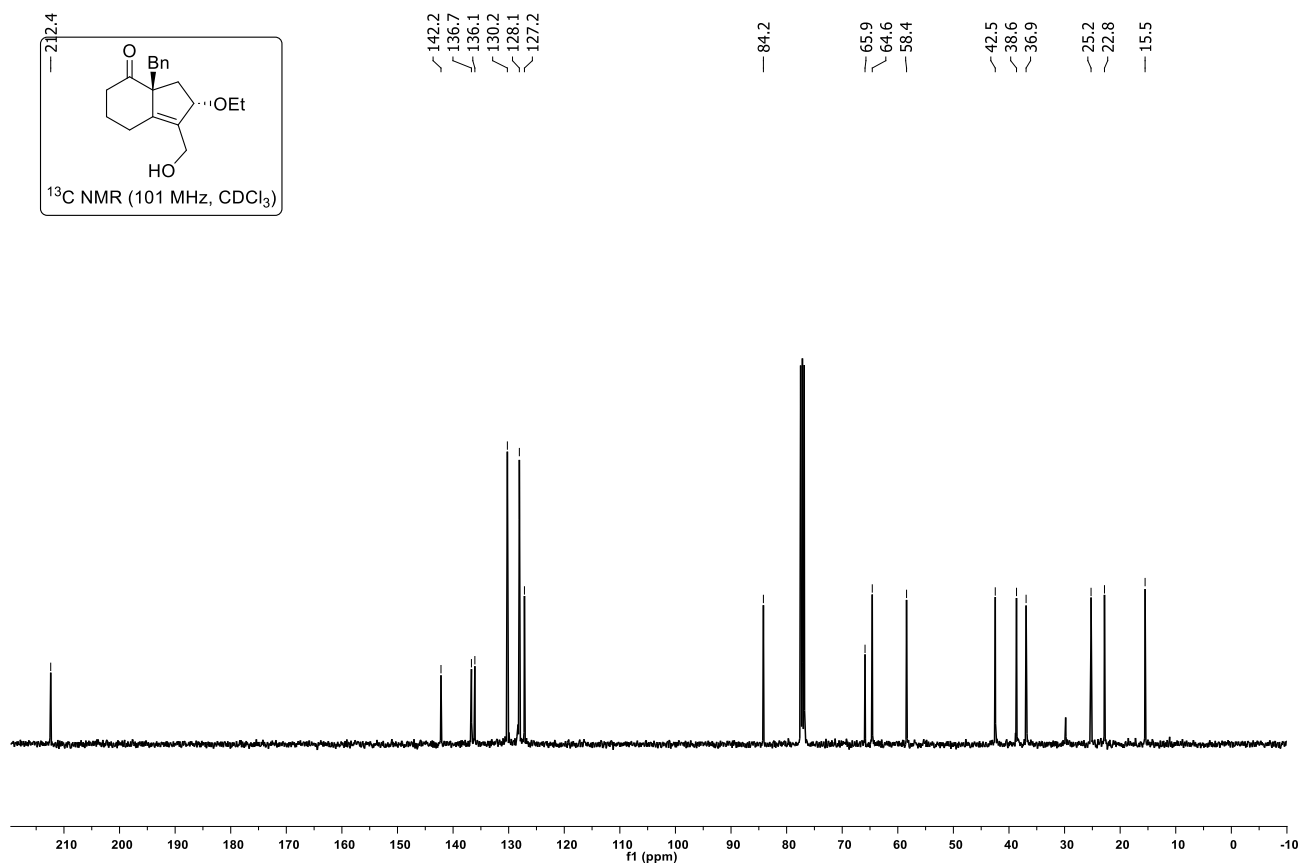

**(2*S*,7*aR*)-7*a*-Benzyl-2-ethoxy-7-oxo-*N*-(pyridin-2-yl)-2,4,5,6,7,7*a*-hexahydro-1*H*-indene-3-carboxamide(8):**

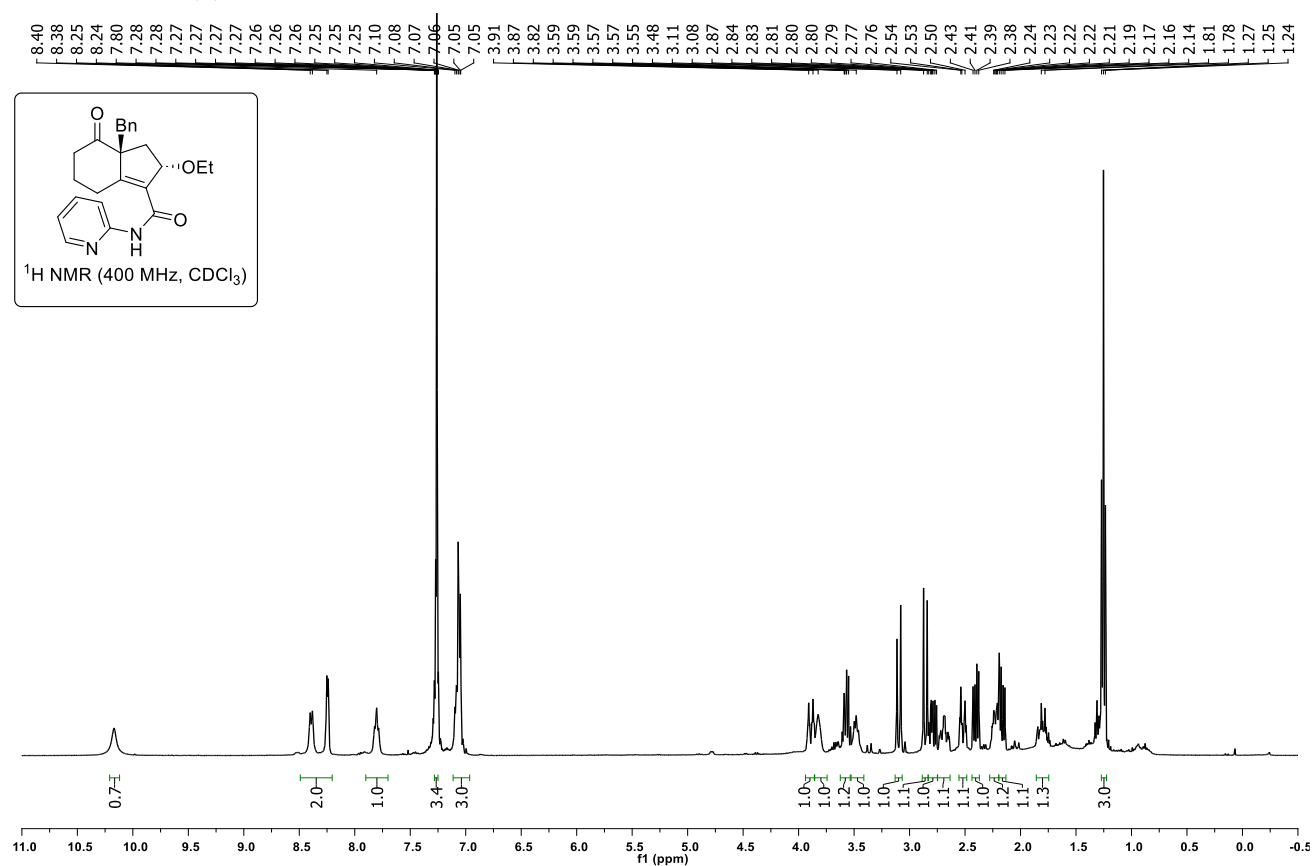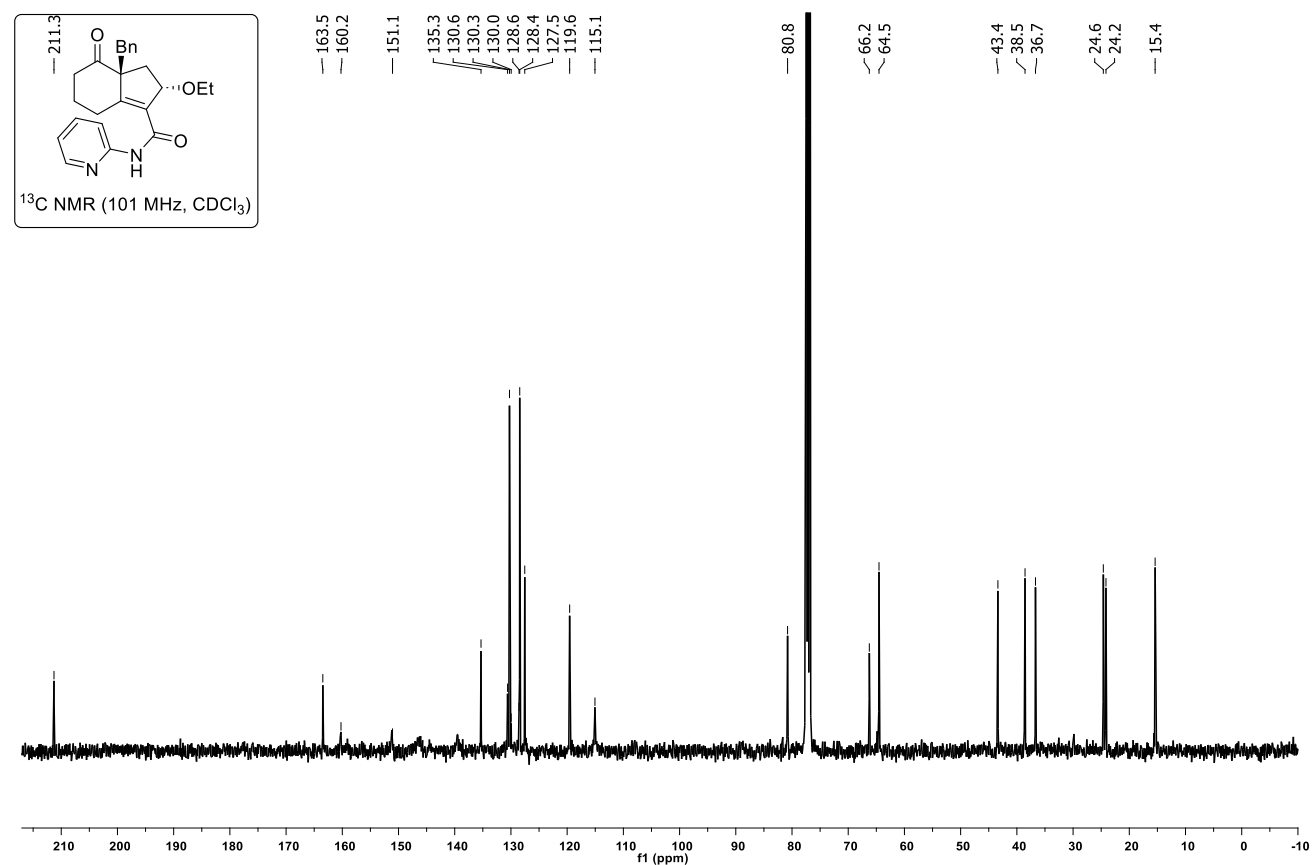

**(2*S*,3*aR*)-3*a*-Benzyl-2-ethoxy-1-ethynyl-2,3,3*a*,5,6,7-hexahydro-4*H*-inden-4-one (9):**

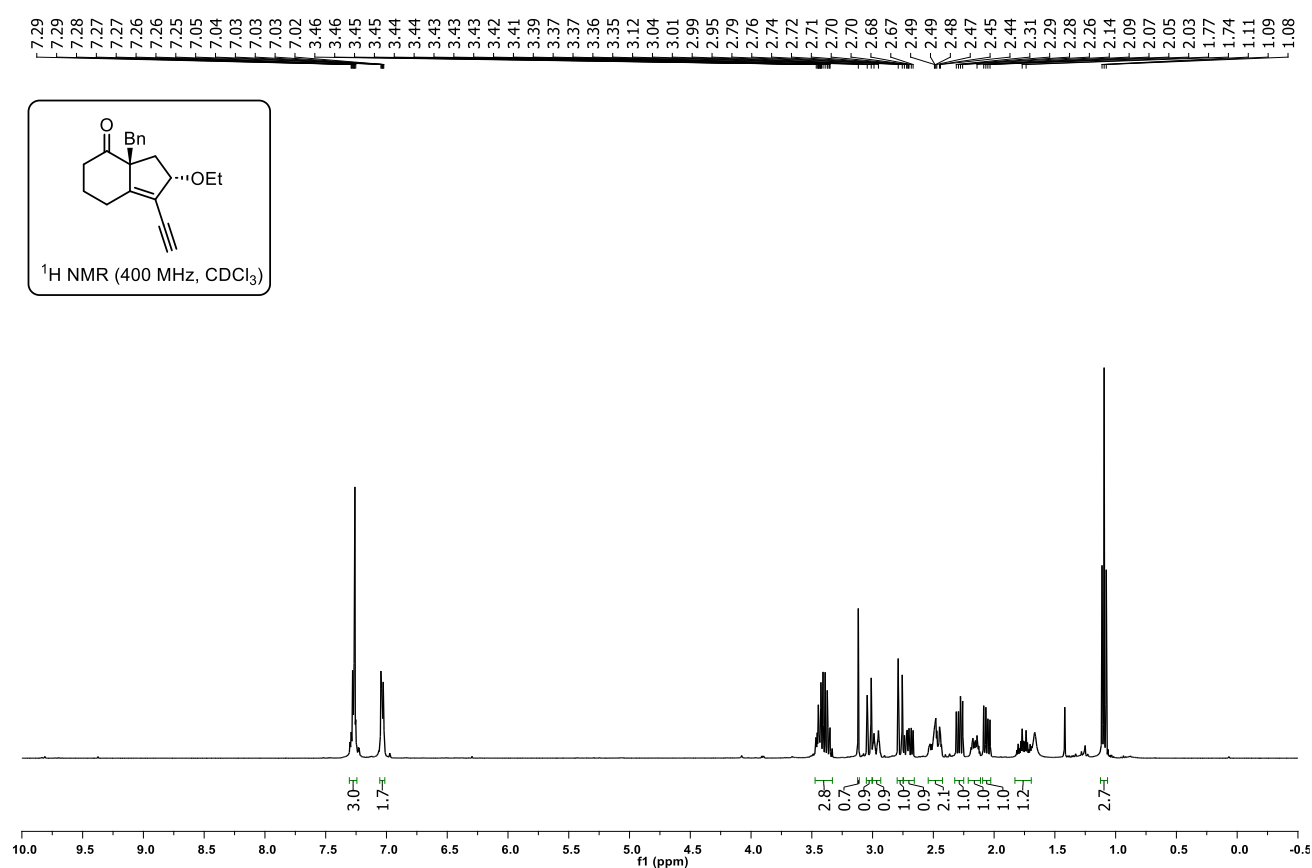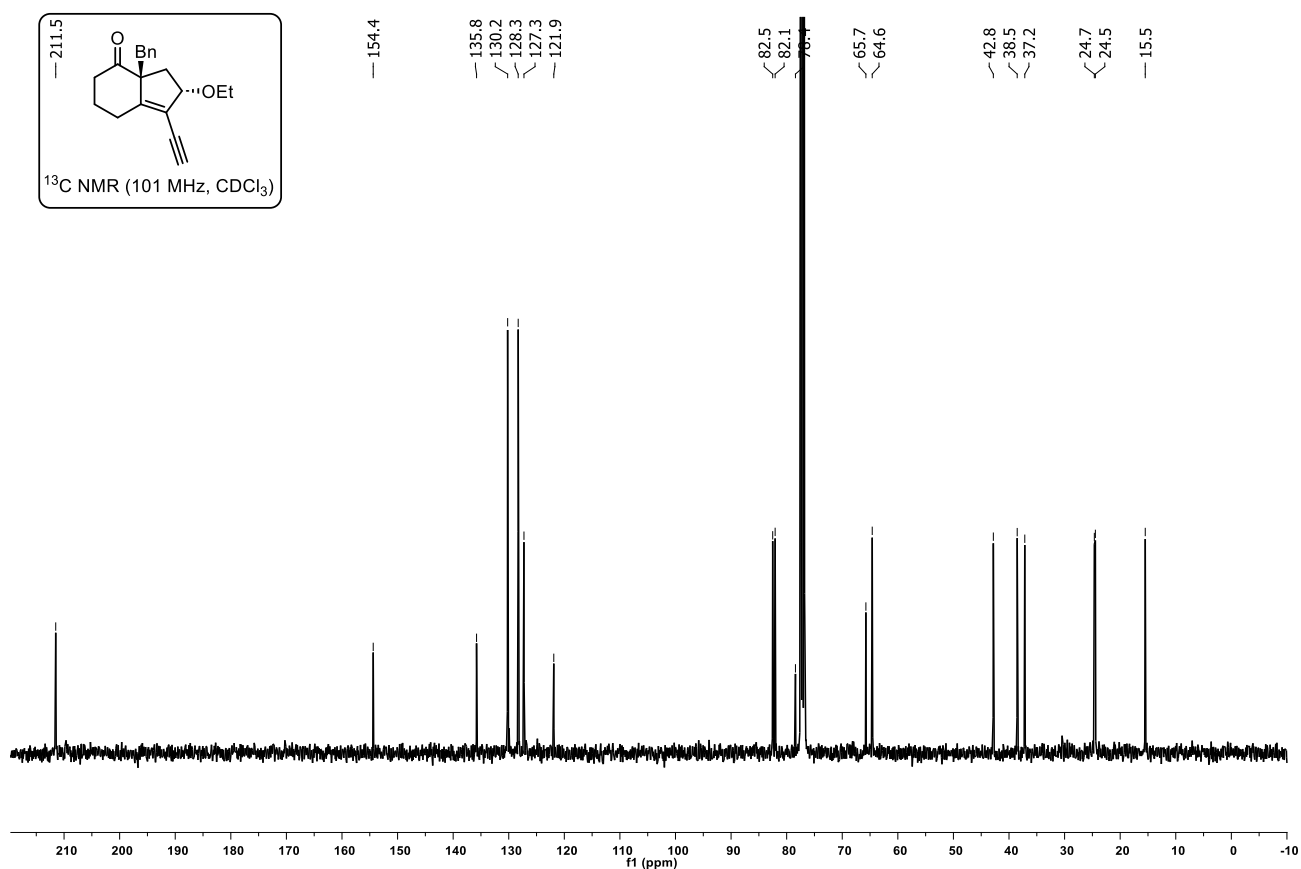

# 4-(1-Methyl-2,6-dioxocyclohexyl)but-2-enal (1):

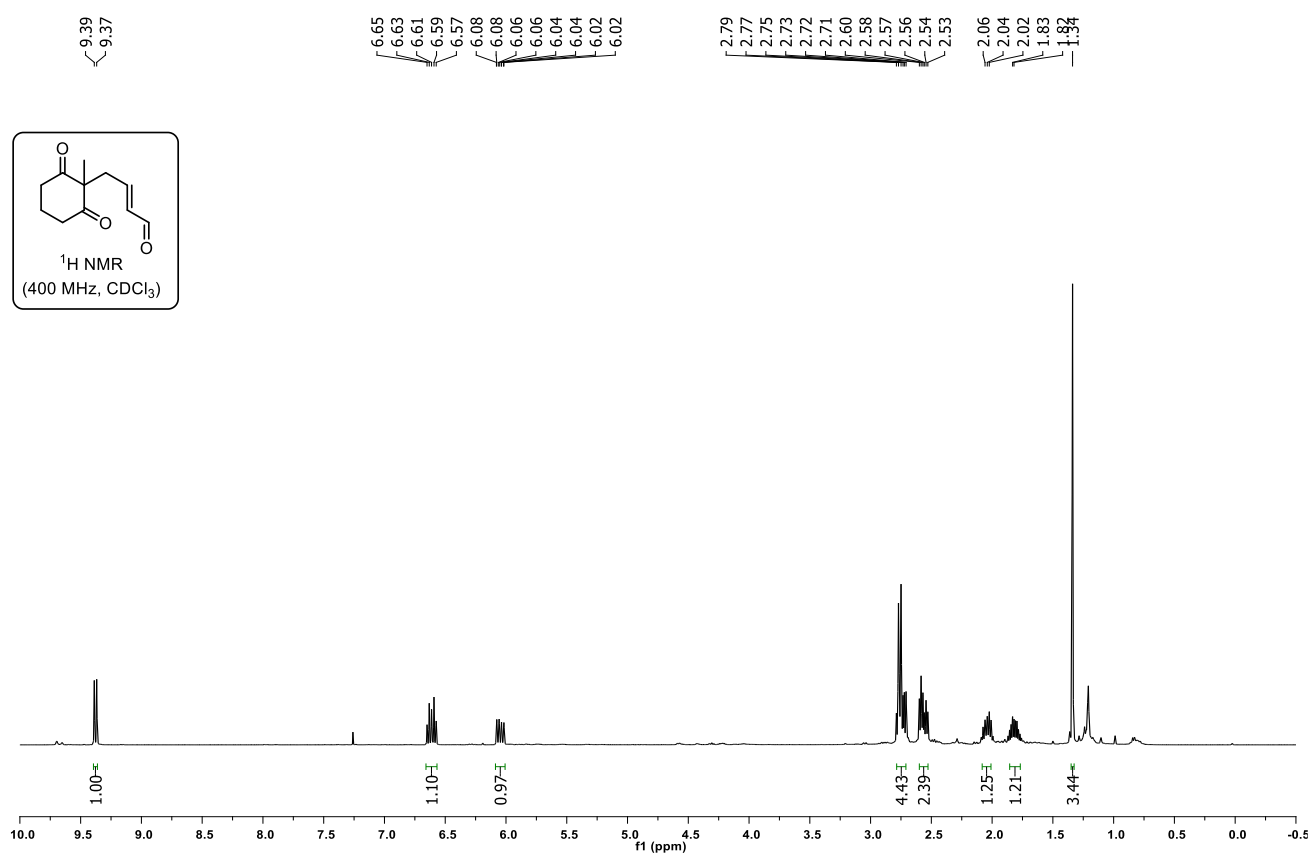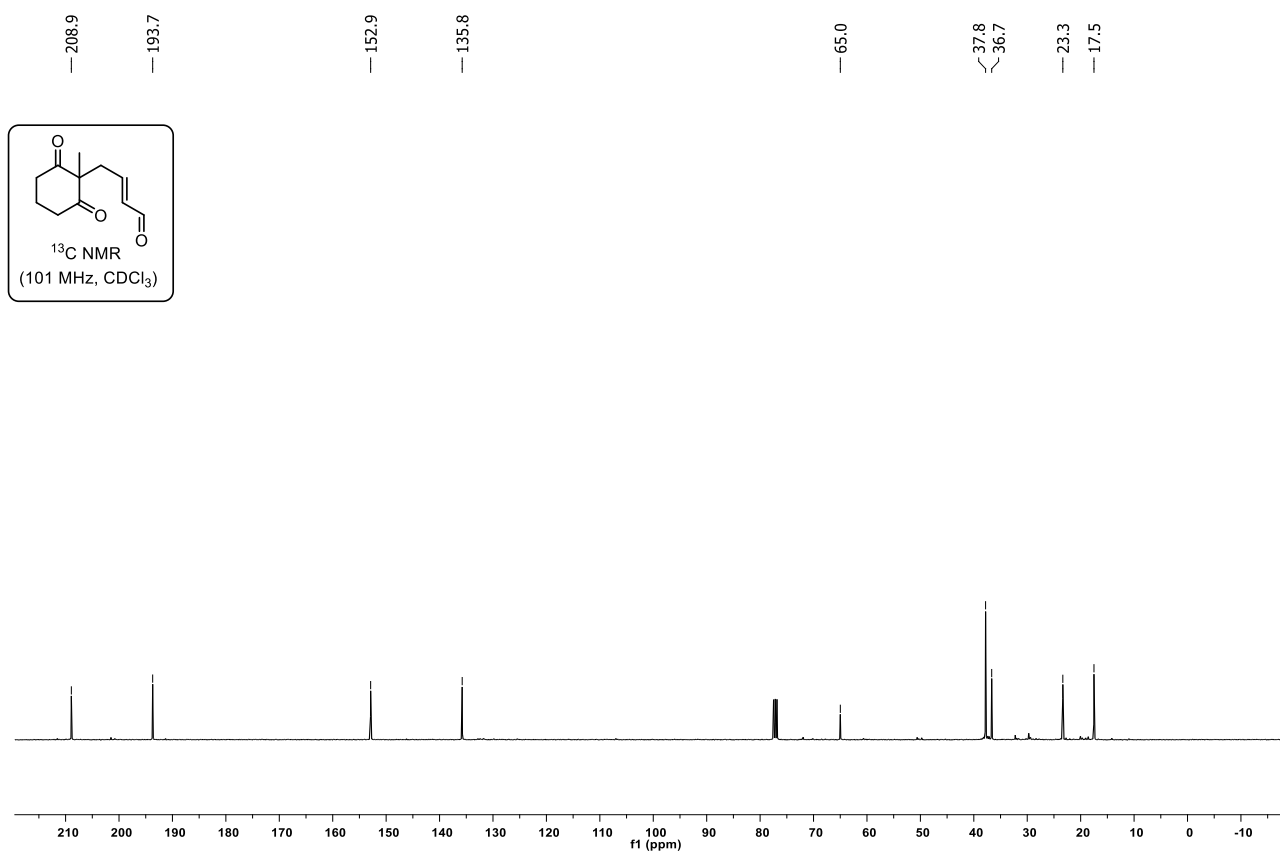

# 4-(2,6-Dioxo-1-propylcyclohexyl)but-2-enal (1d):

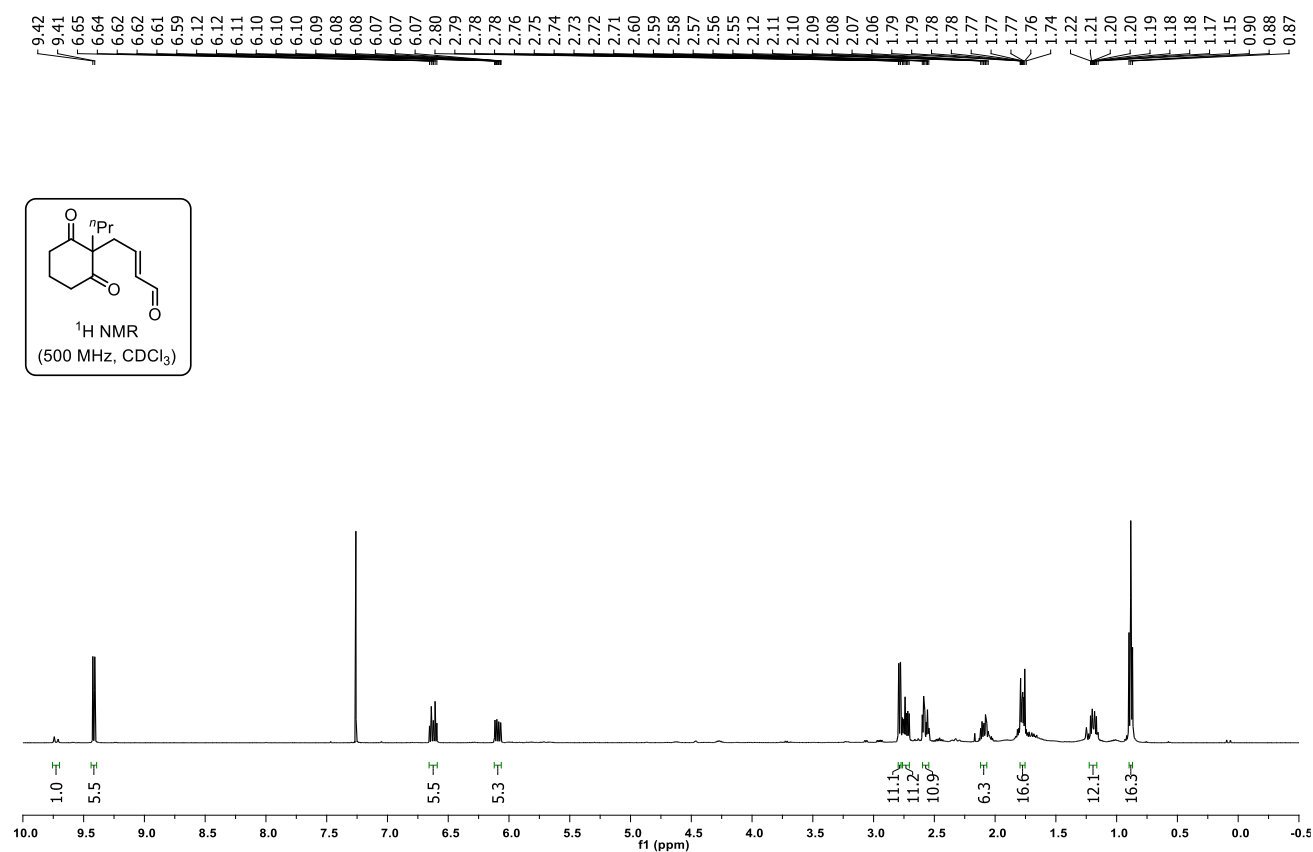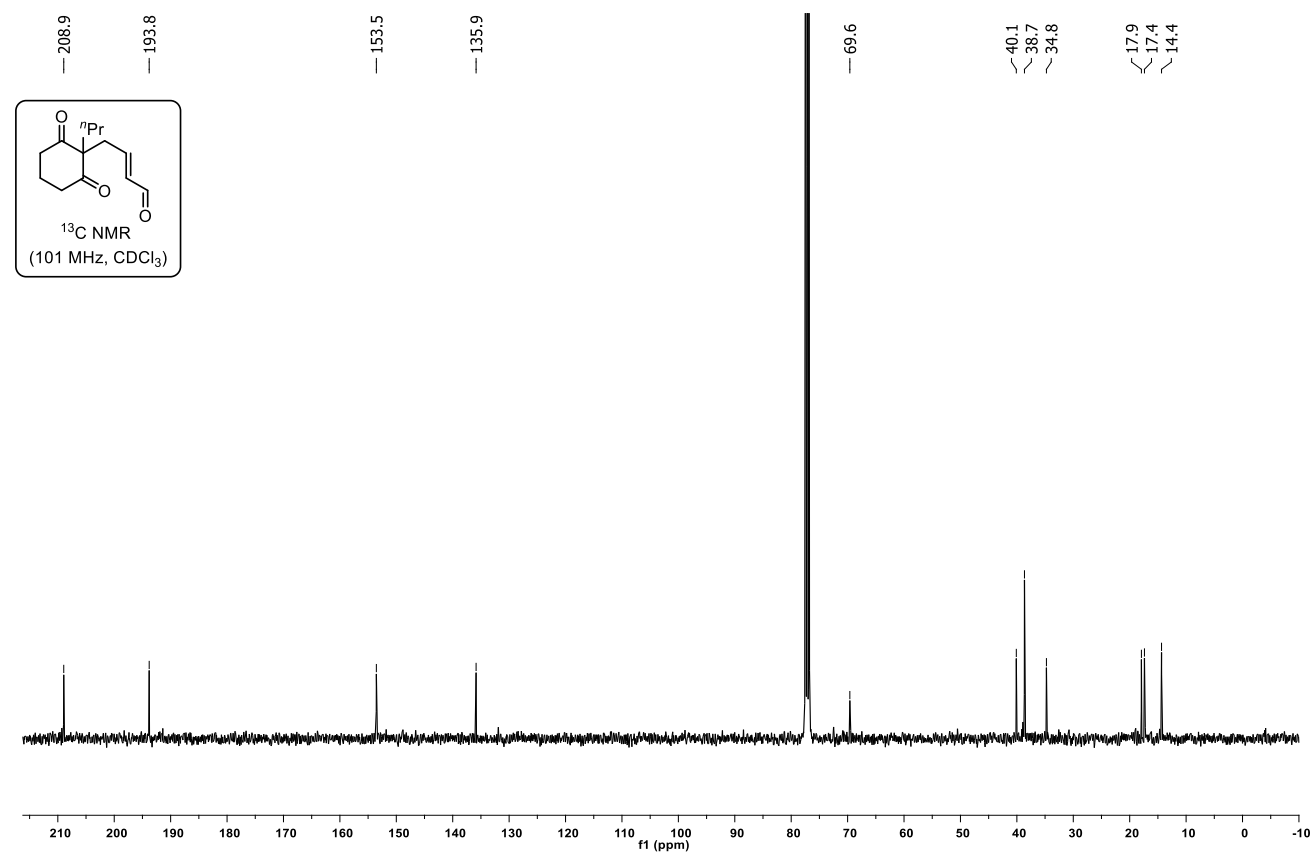

# 4-(1-(Cyclohexylmethyl)-2,6-dioxocyclohexyl)but-2-enal (1e):

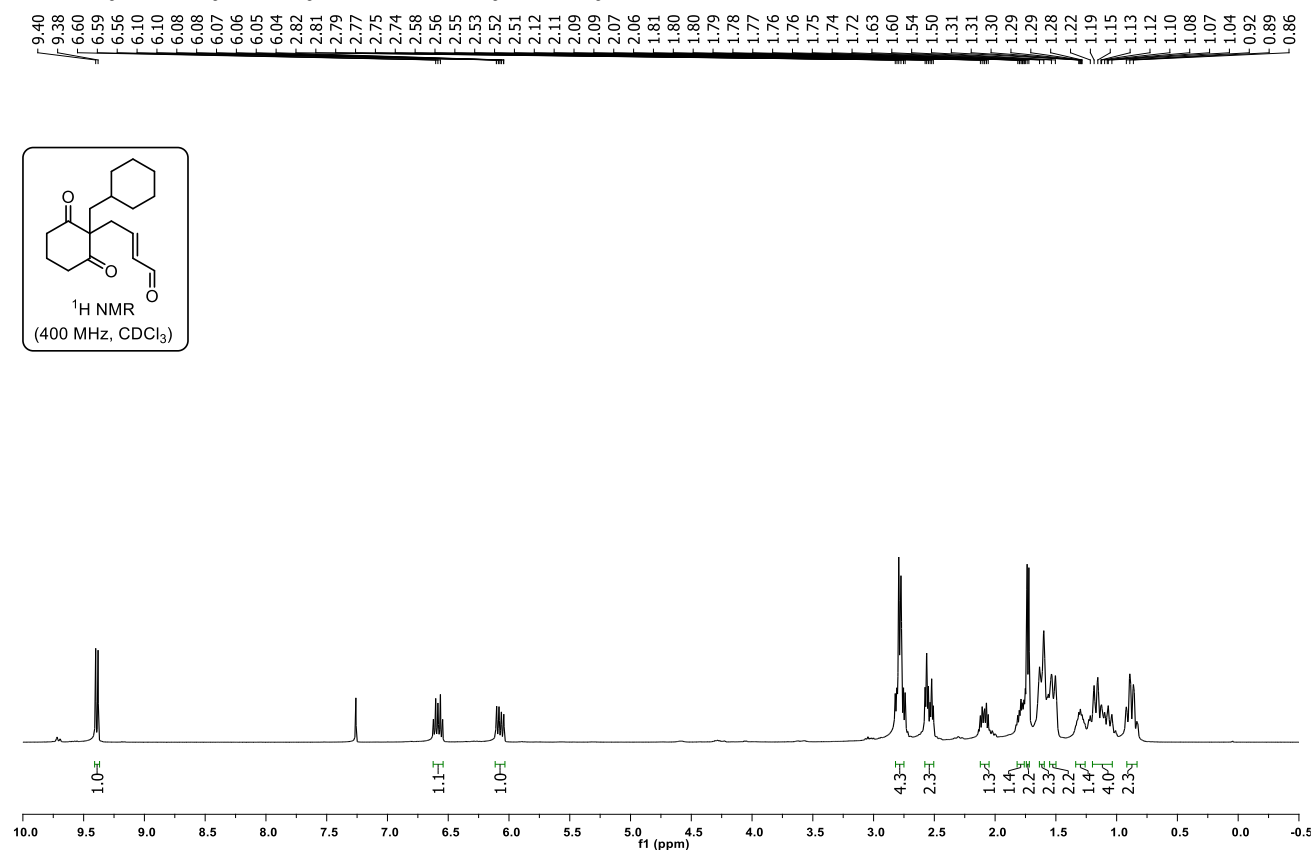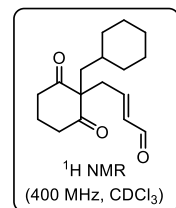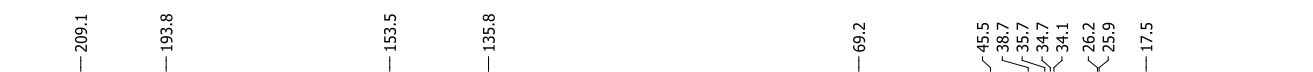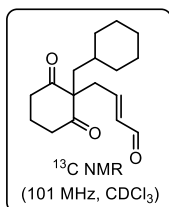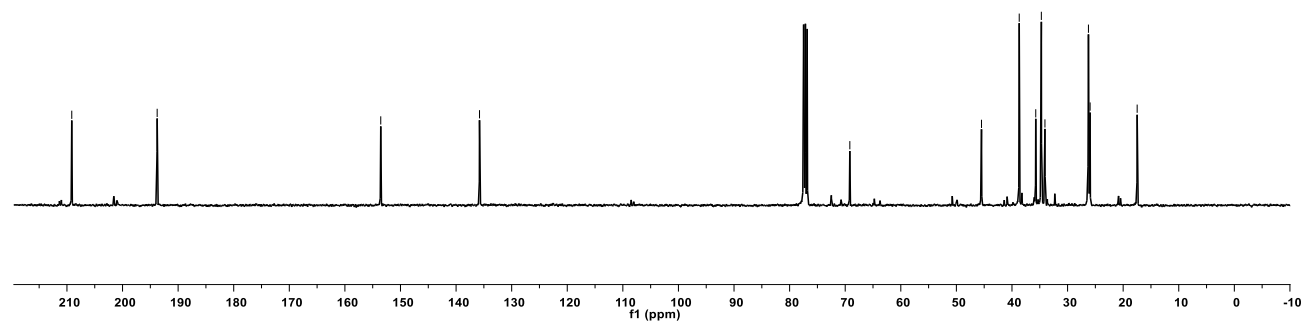

# 4-(1-Allyl-2,6-dioxocyclohexyl)but-2-enal (1f):

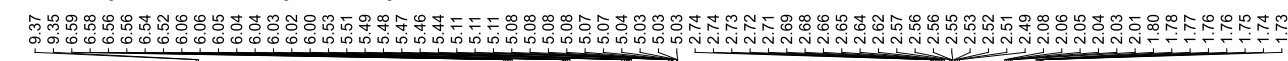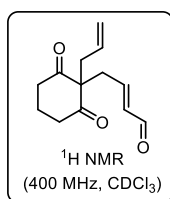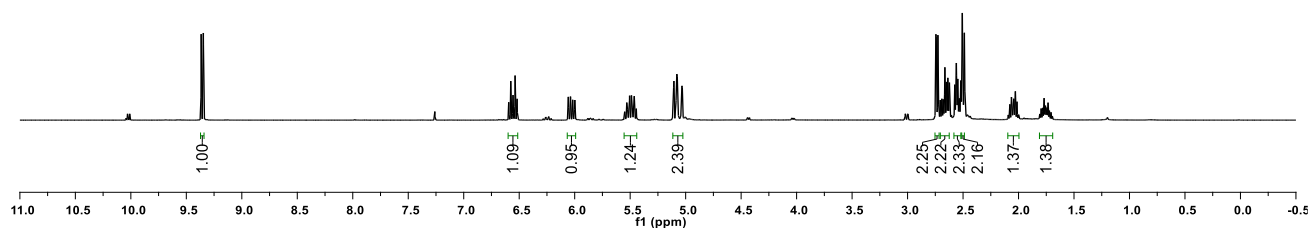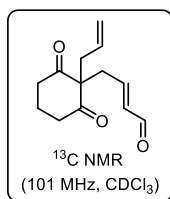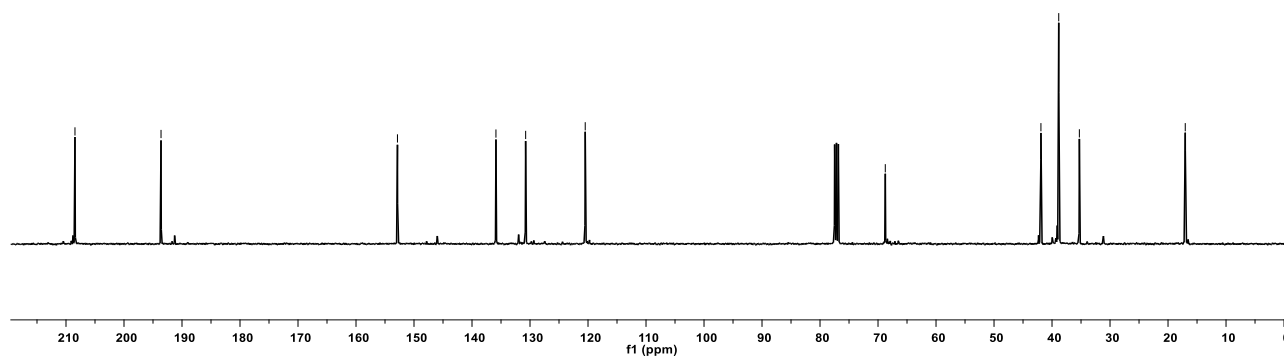

# 4-(1-Benzyl-2,6-dioxocyclohexyl)but-2-enal(1g):

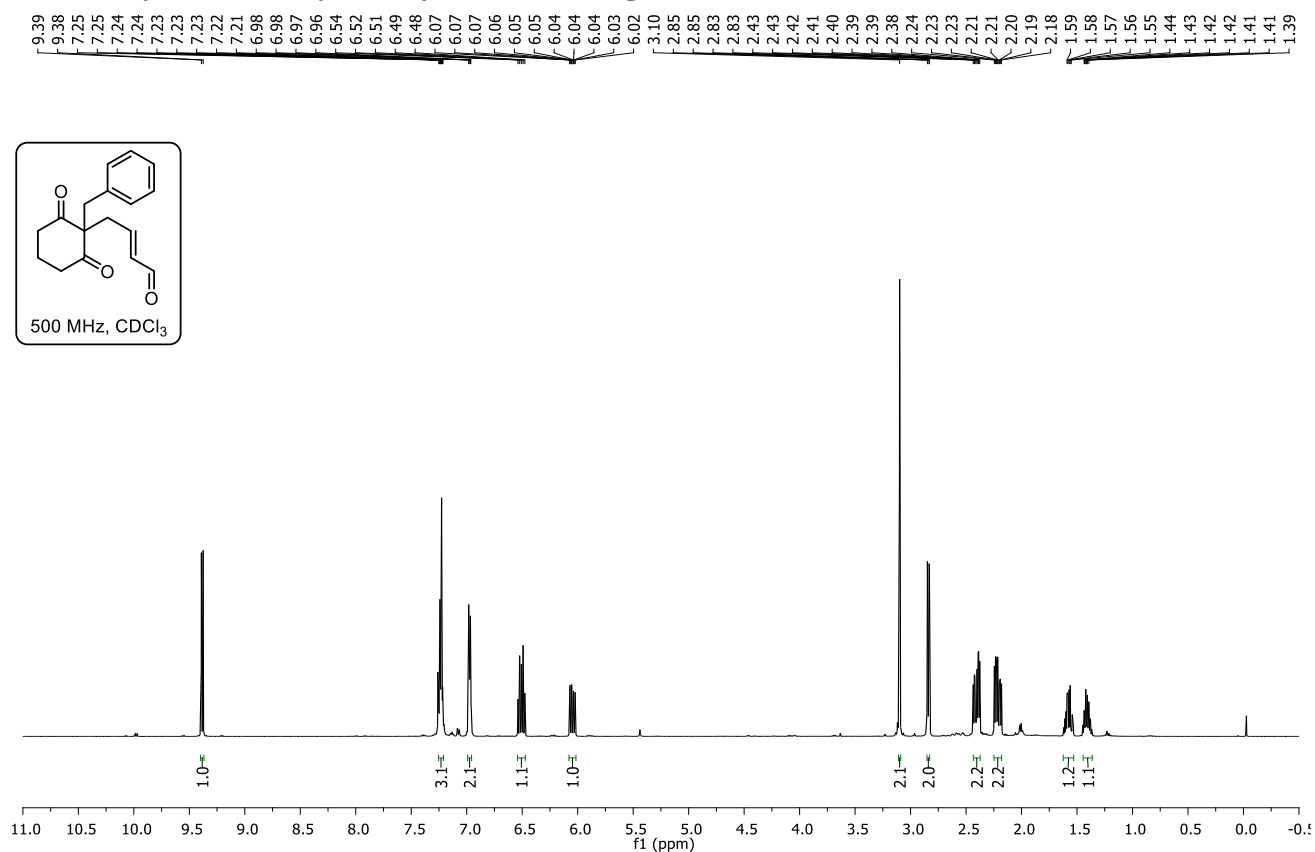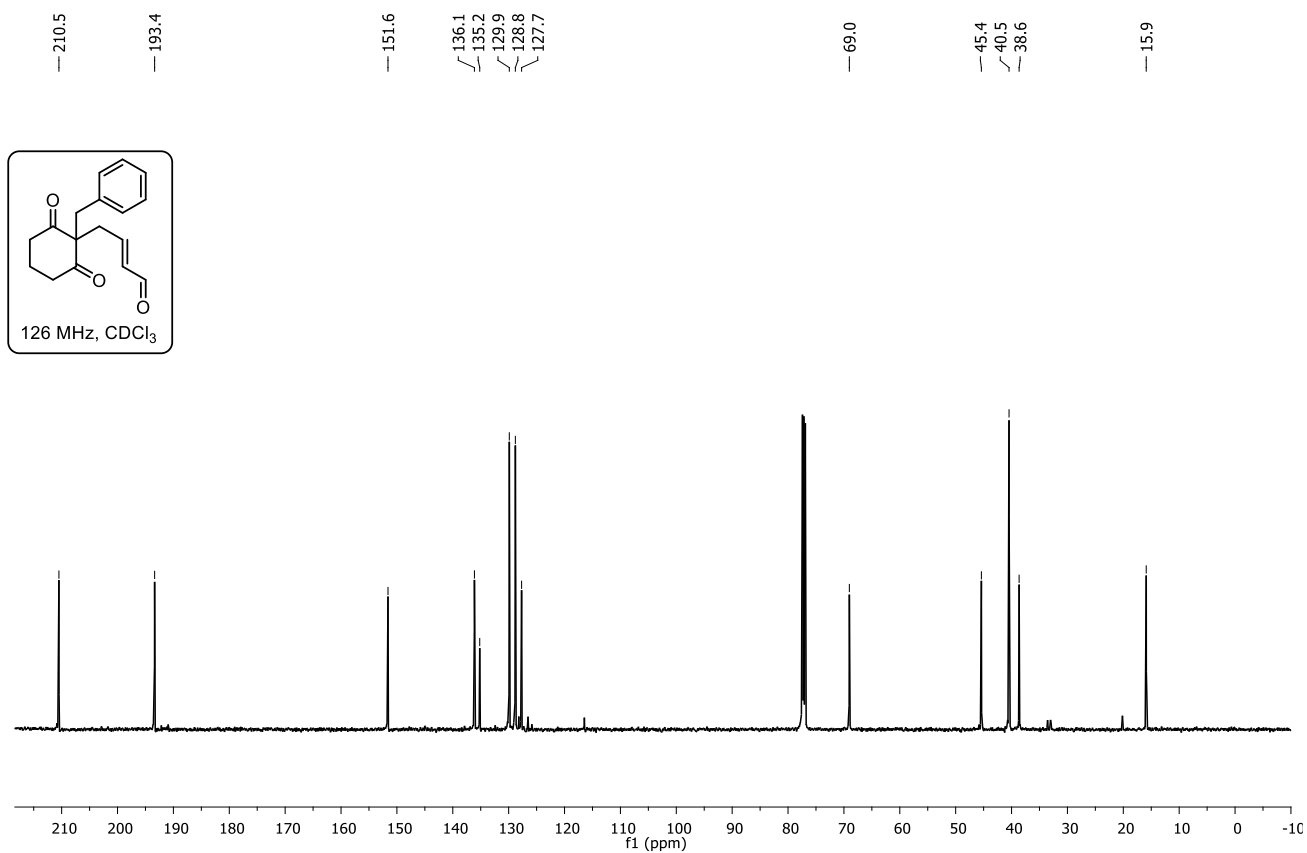

**4-(1-(4-Methylbenzyl)-2,6-dioxocyclohexyl)but-2-enal (1h):**

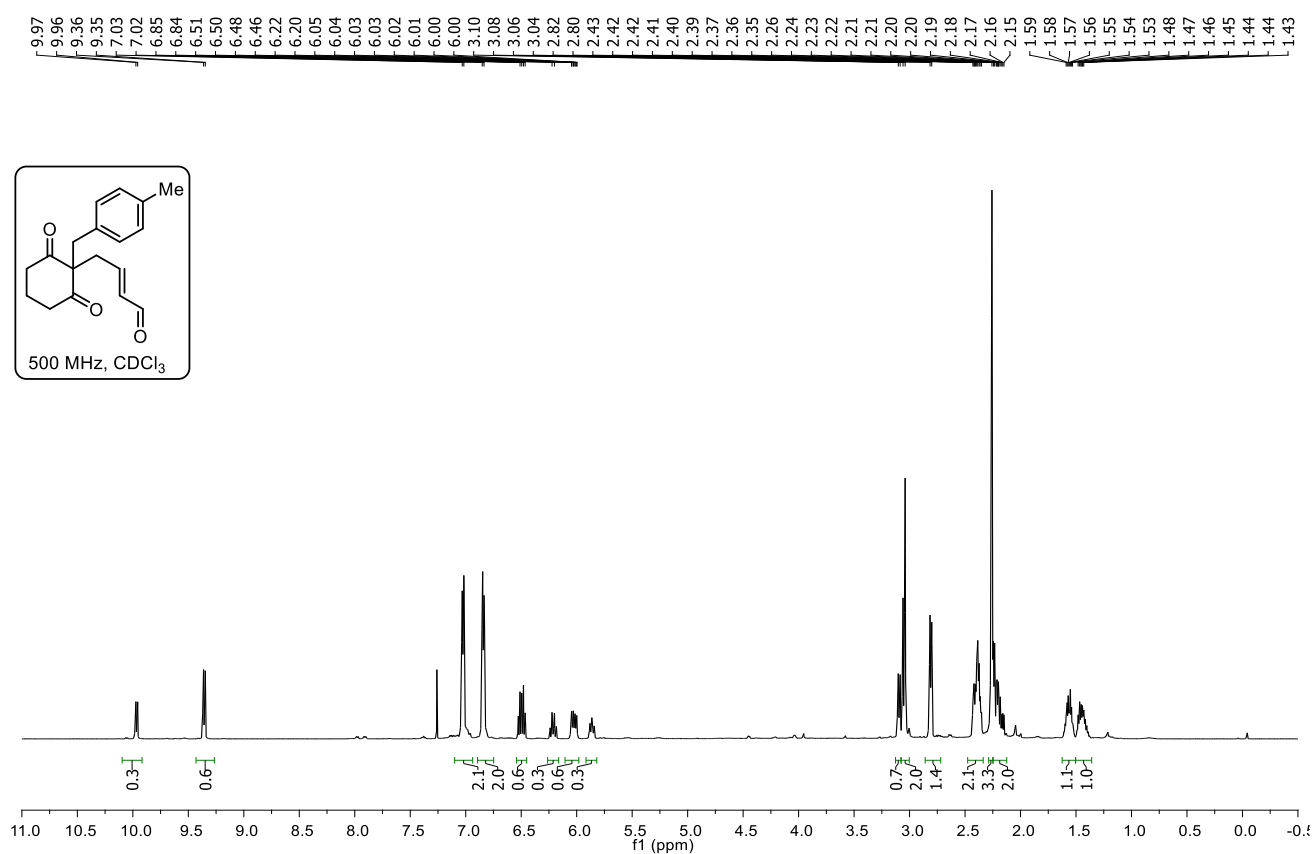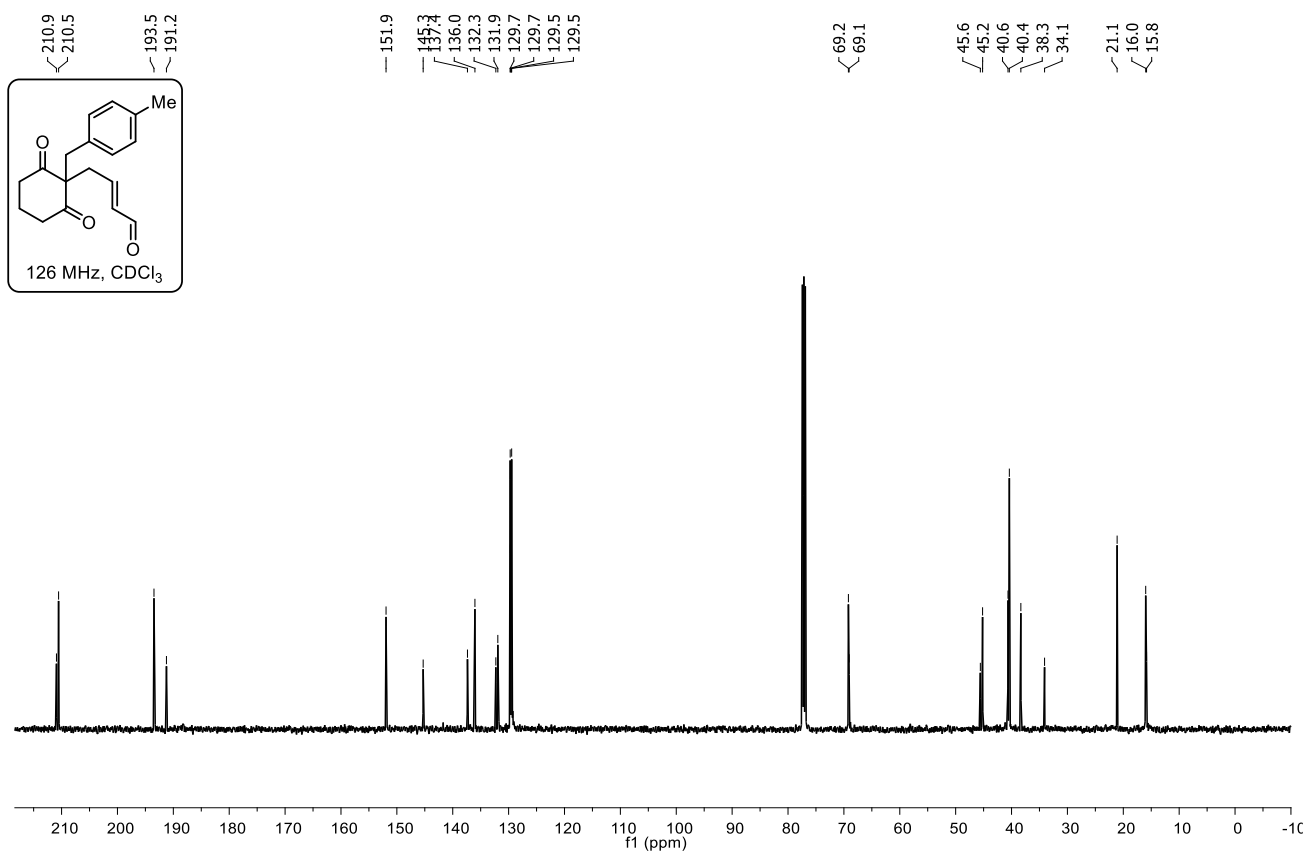

# 4-(1-(4-Fluorobenzyl)-2,6-dioxocyclohexyl)but-2-enal (1i):

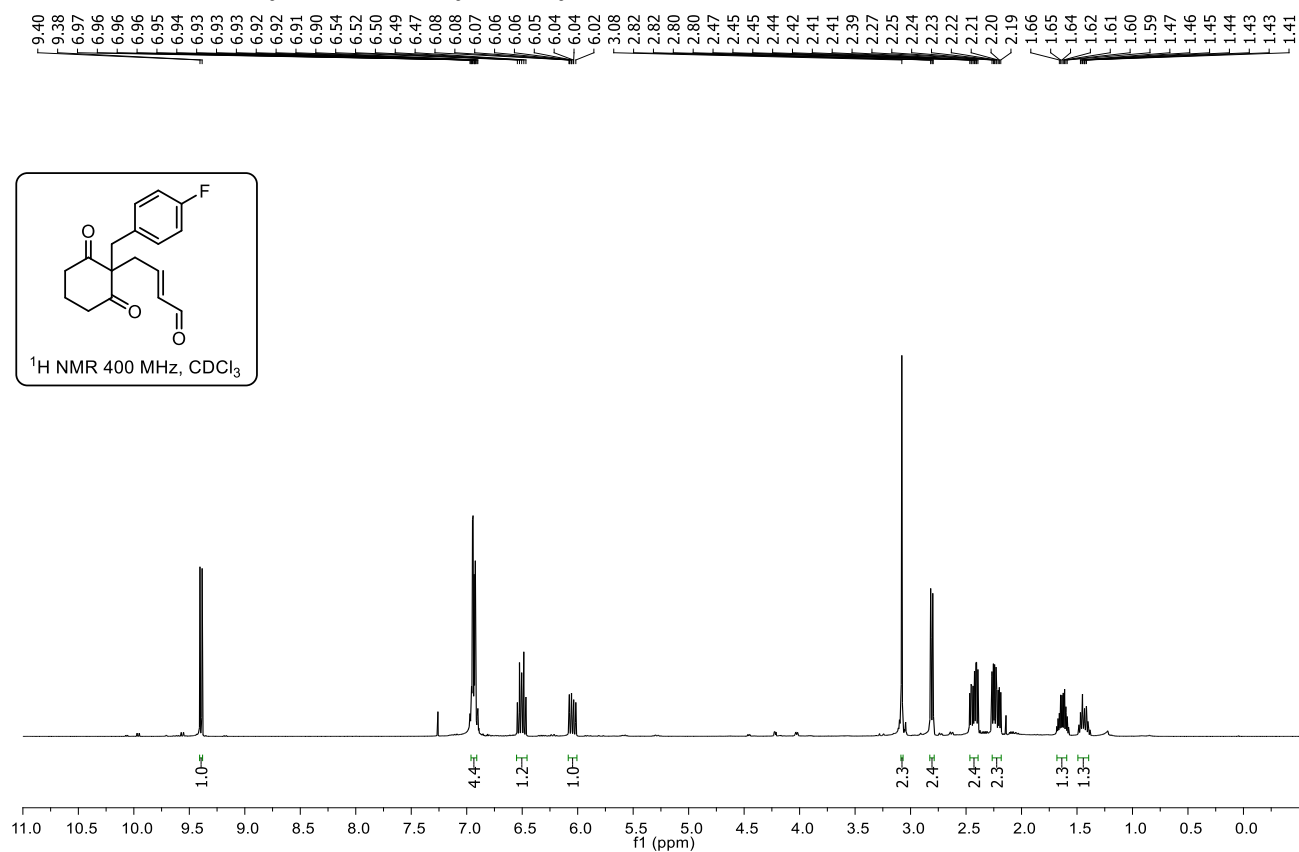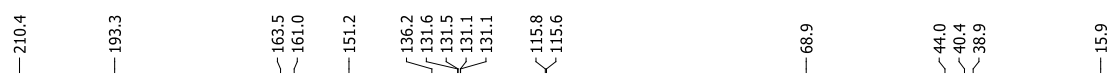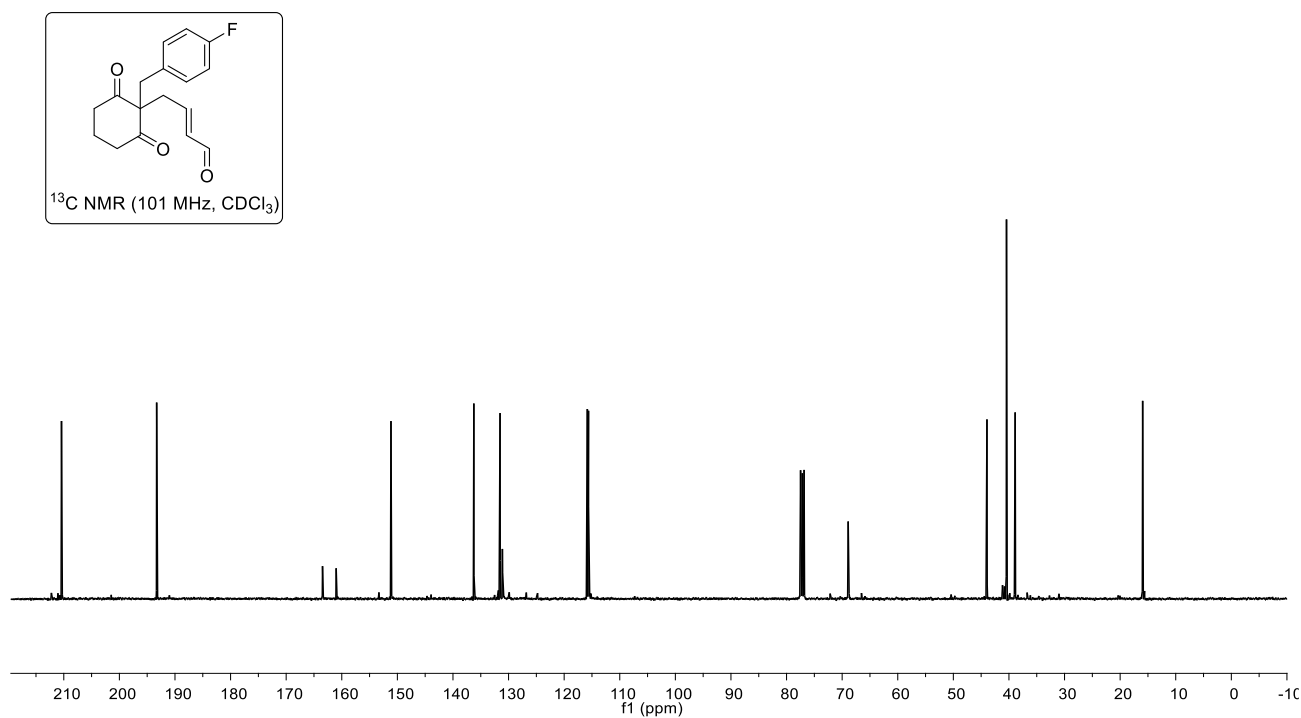

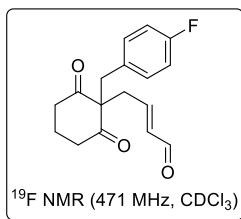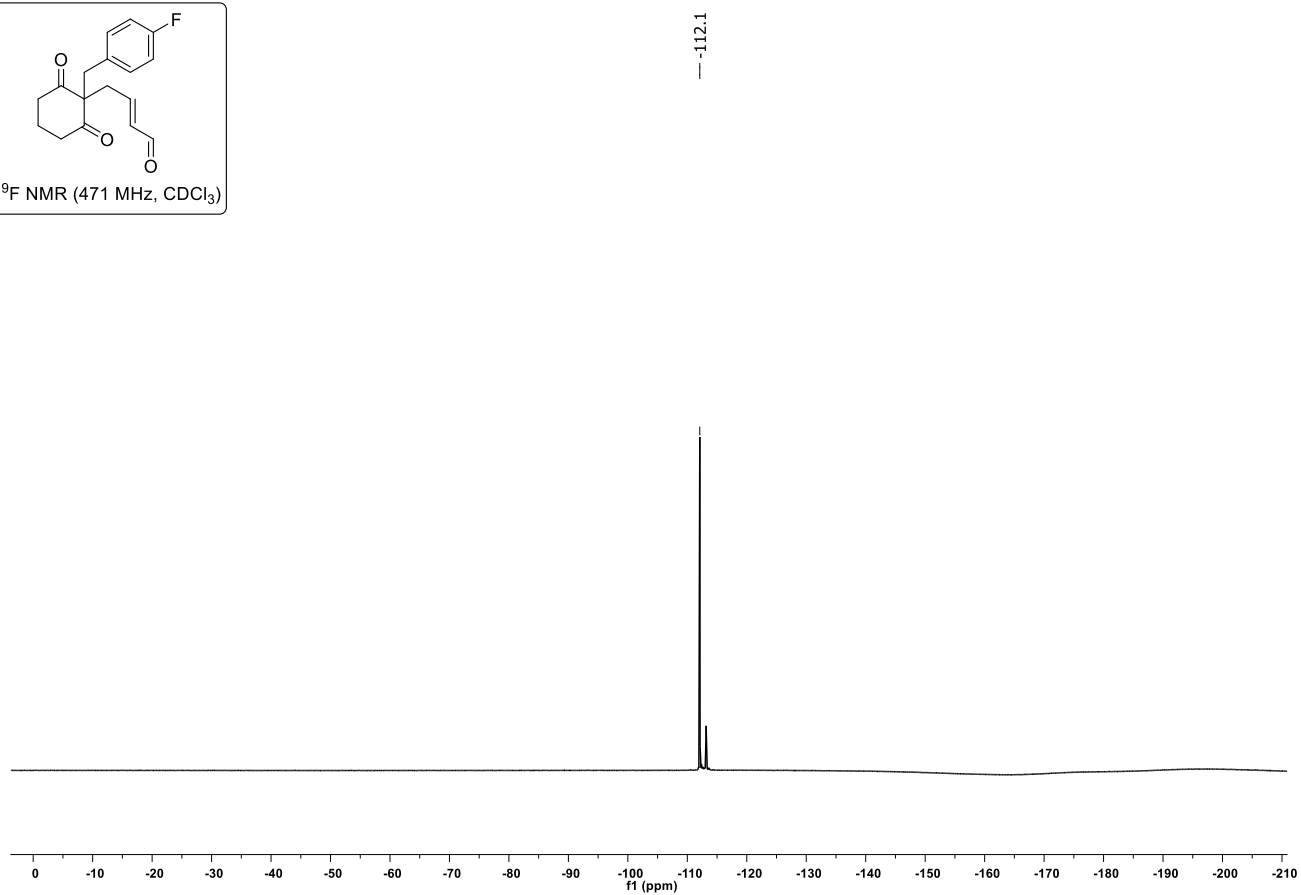

# 4-(1-(4-Chlorobenzyl)-2,6-dioxocyclohexyl)but-2-enal (1j):

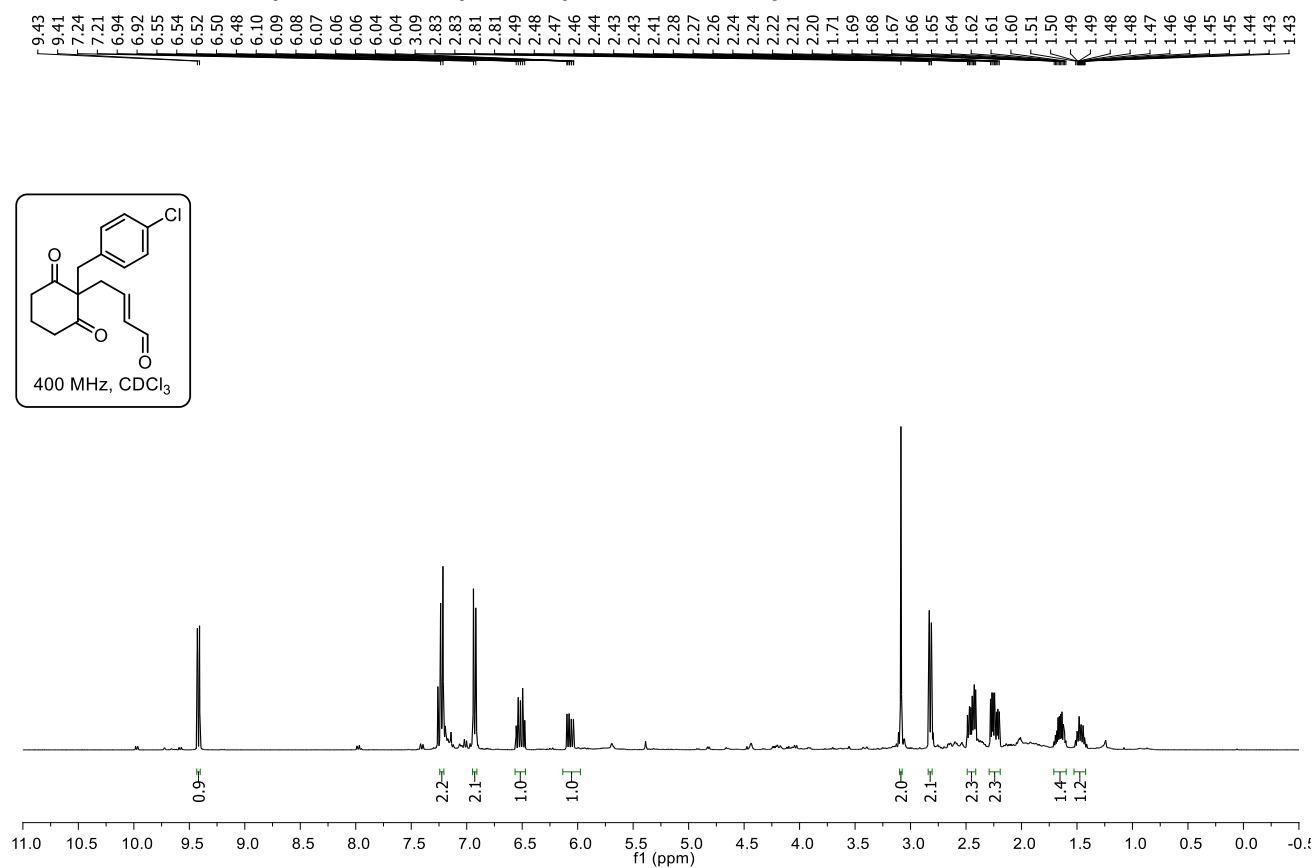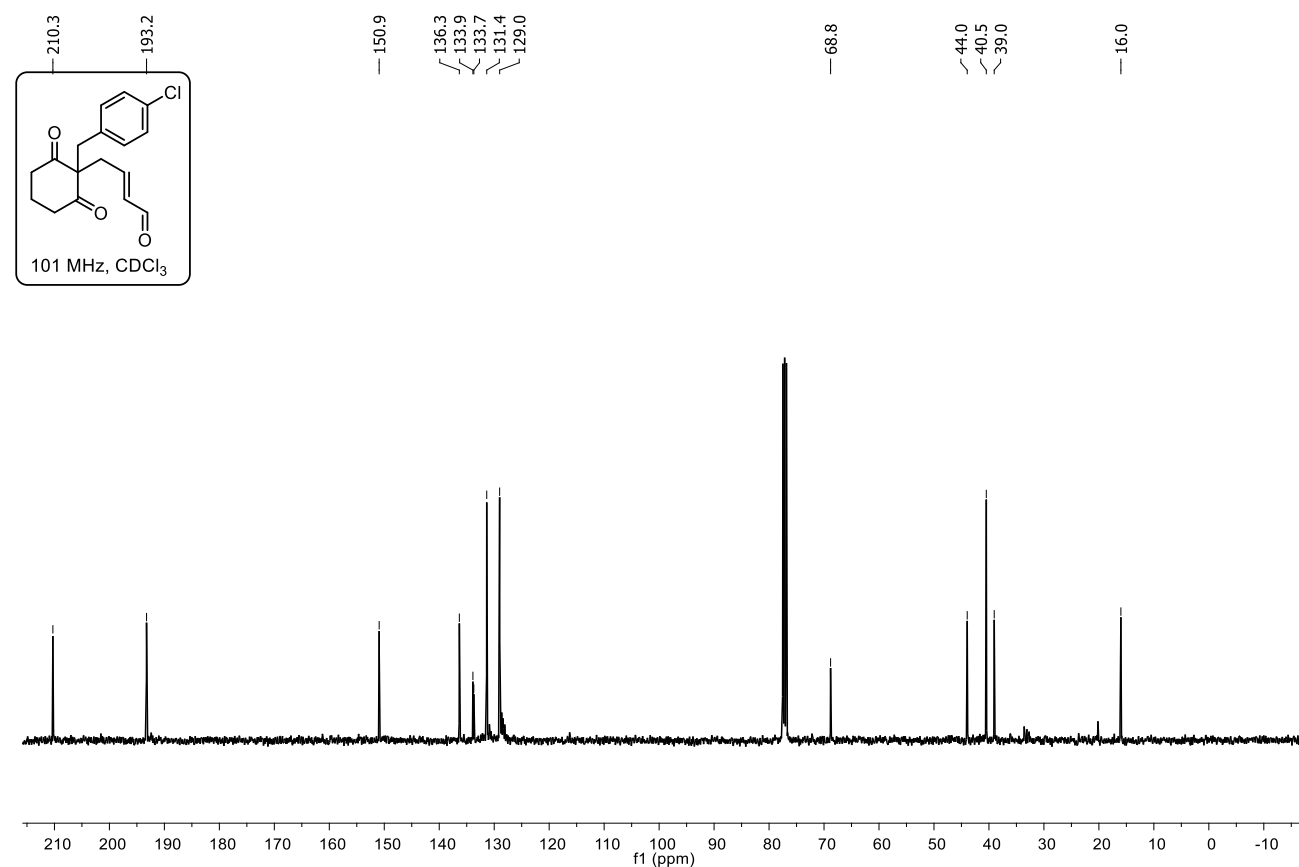

# **4-(1-(4-Bromobenzyl)-2,6-dioxocyclohexyl)but-2-enal (1k):**

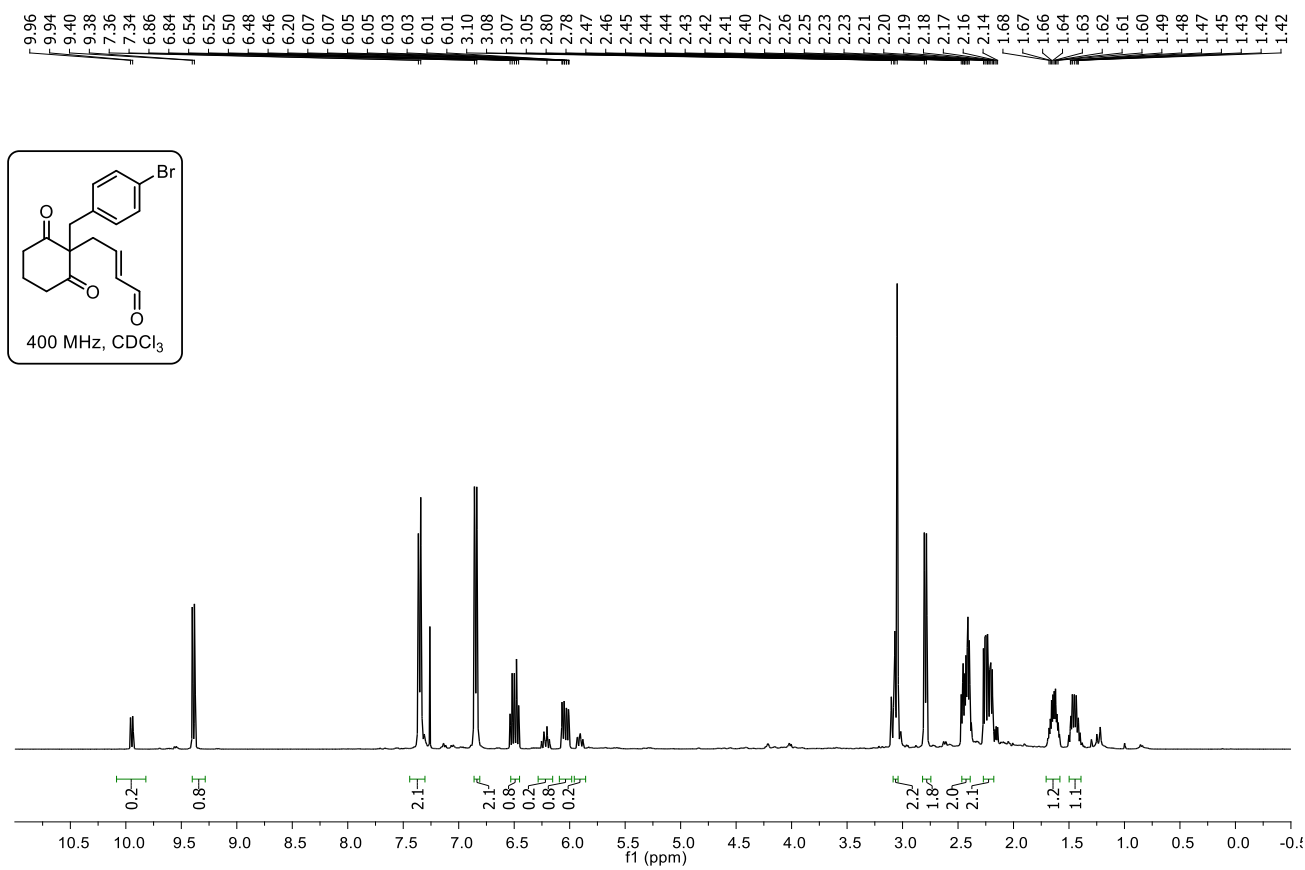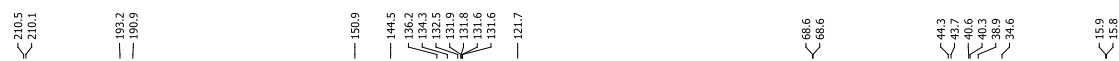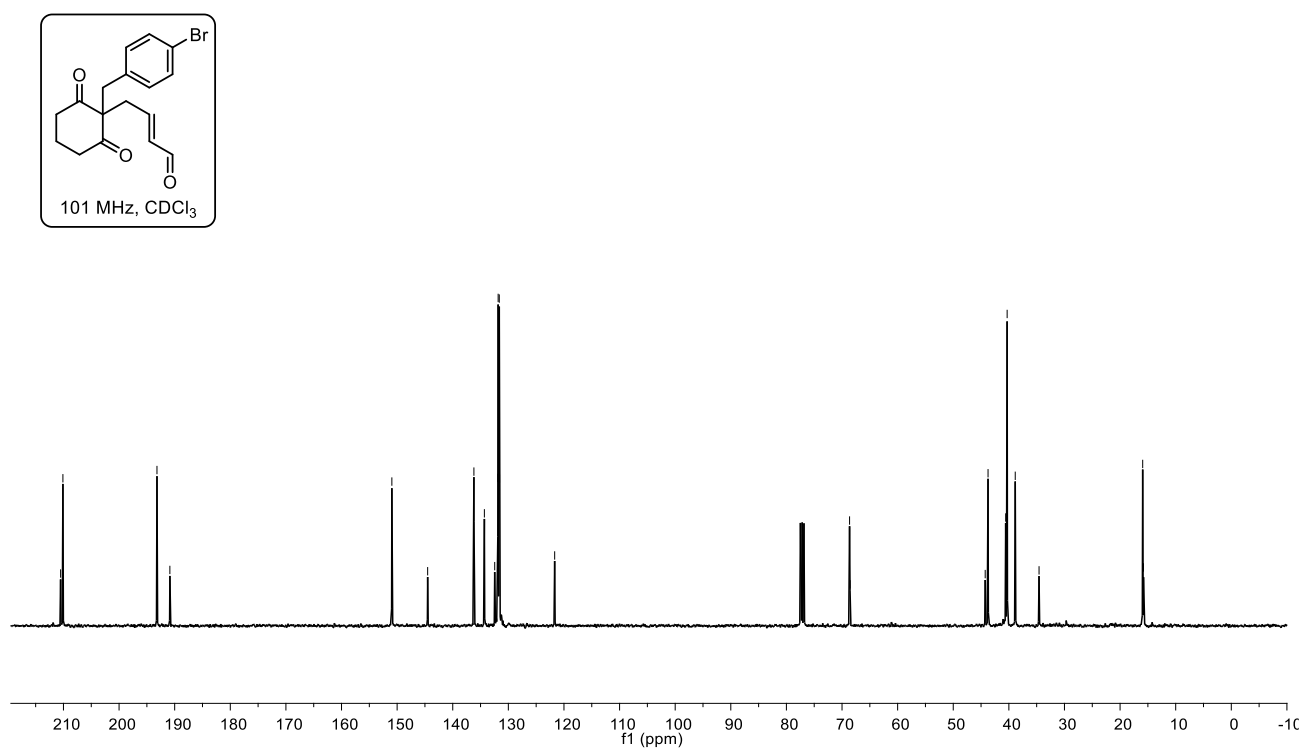

**4-(1-([1,1'-Biphenyl]-4-ylmethyl)-2,6-dioxocyclohexyl)but-2-enal (11):**

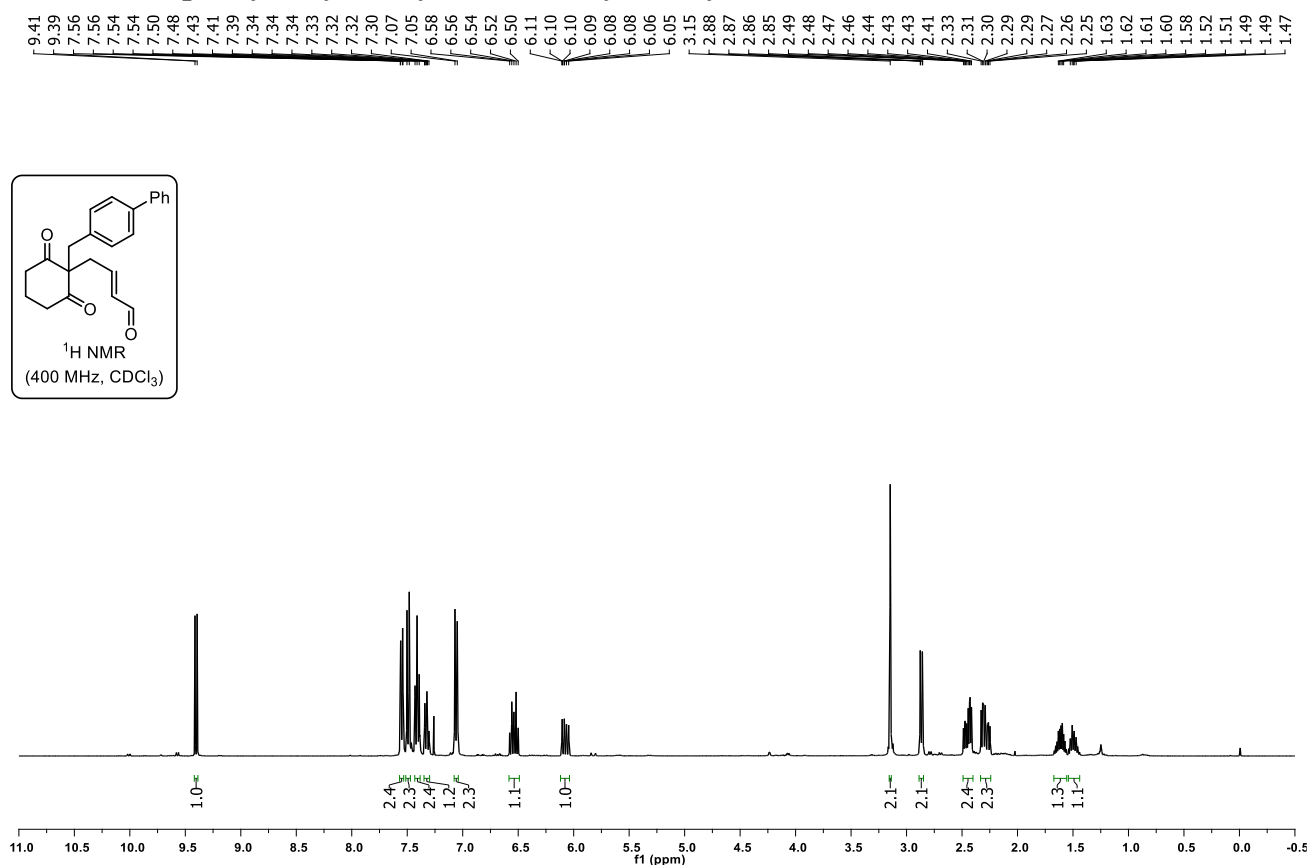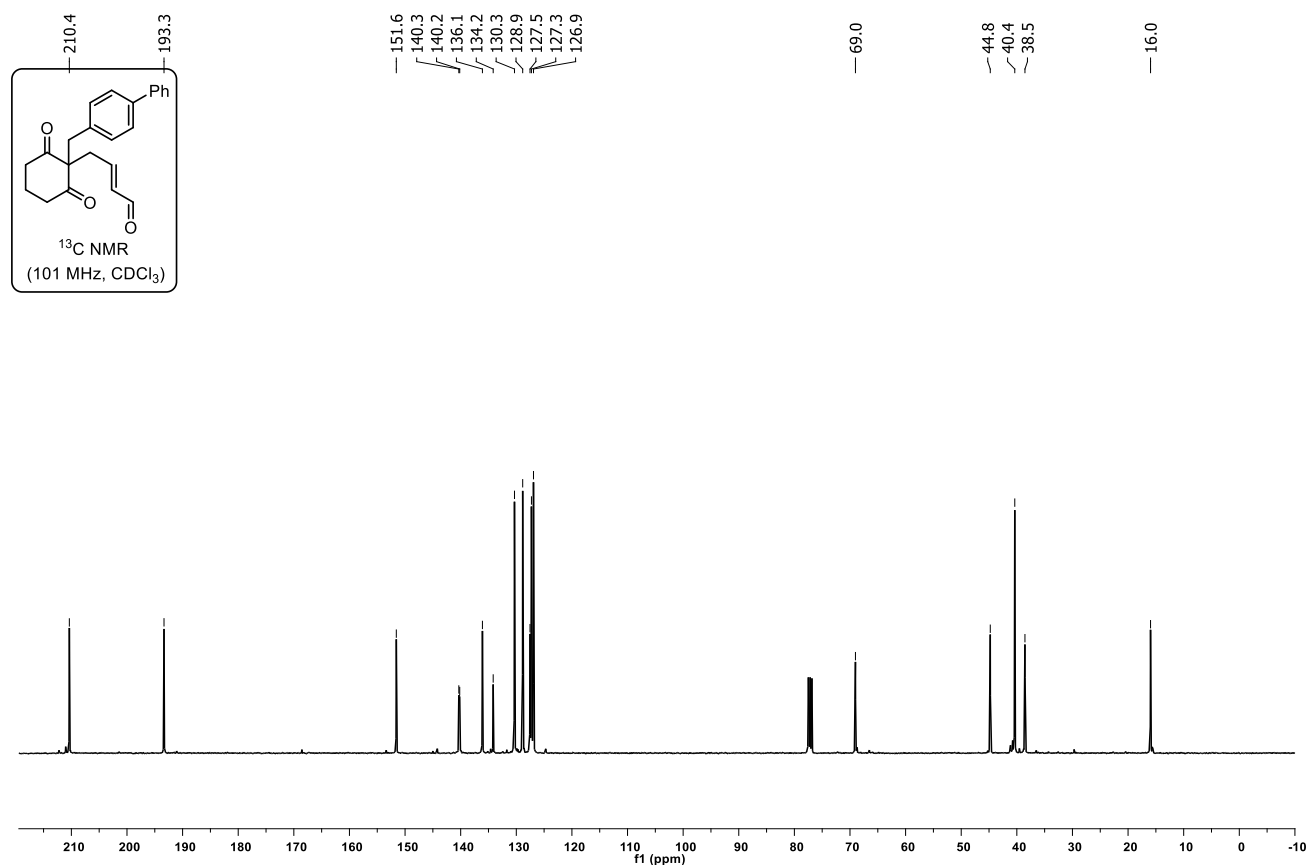

**4-(1-(4-Nitrobenzyl)-2,6-dioxocyclohexyl)but-2-enal(1m):**

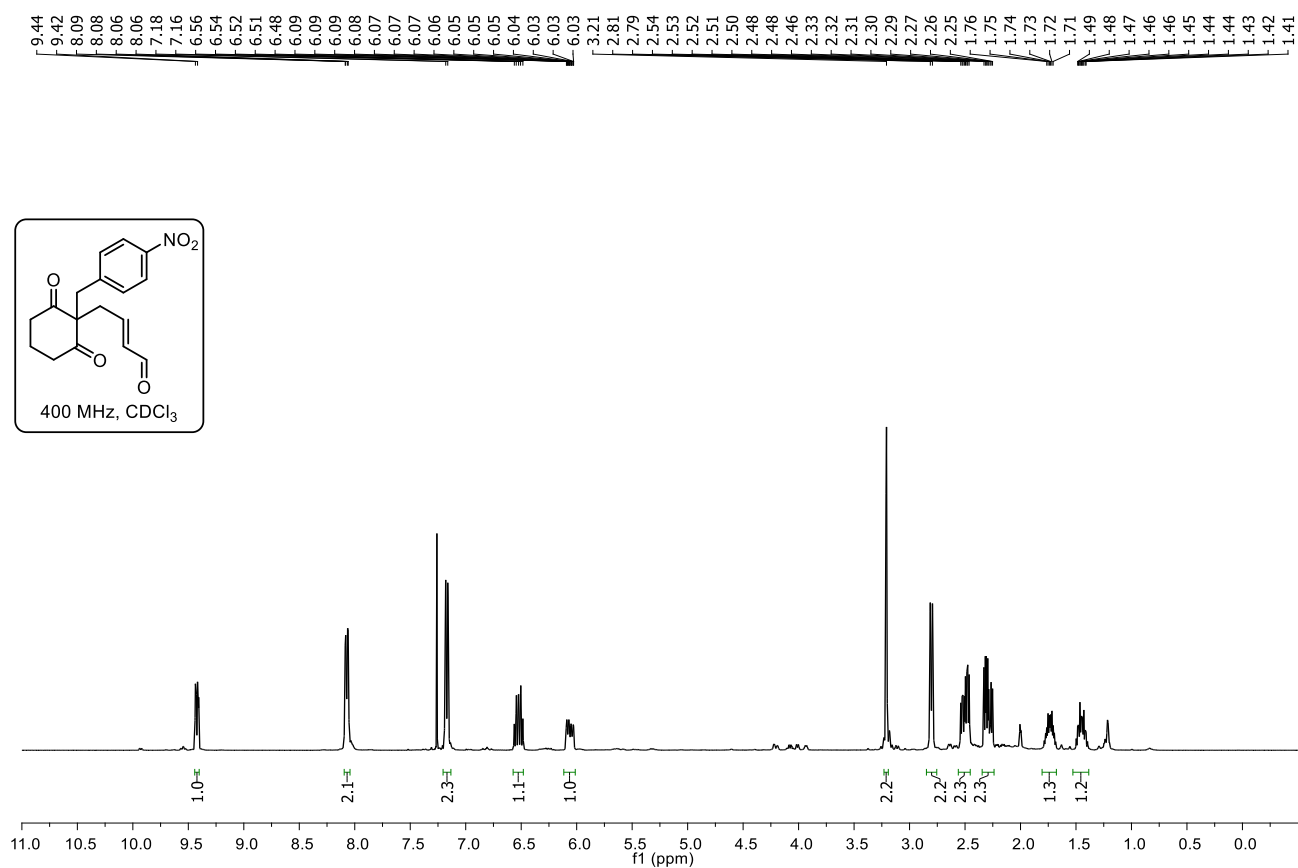

209.5, 193.0, 149.9, 147.3, 143.3, 136.5, 131.1, 123.8, 68.6, 42.4, 40.1, 39.5, 16.0

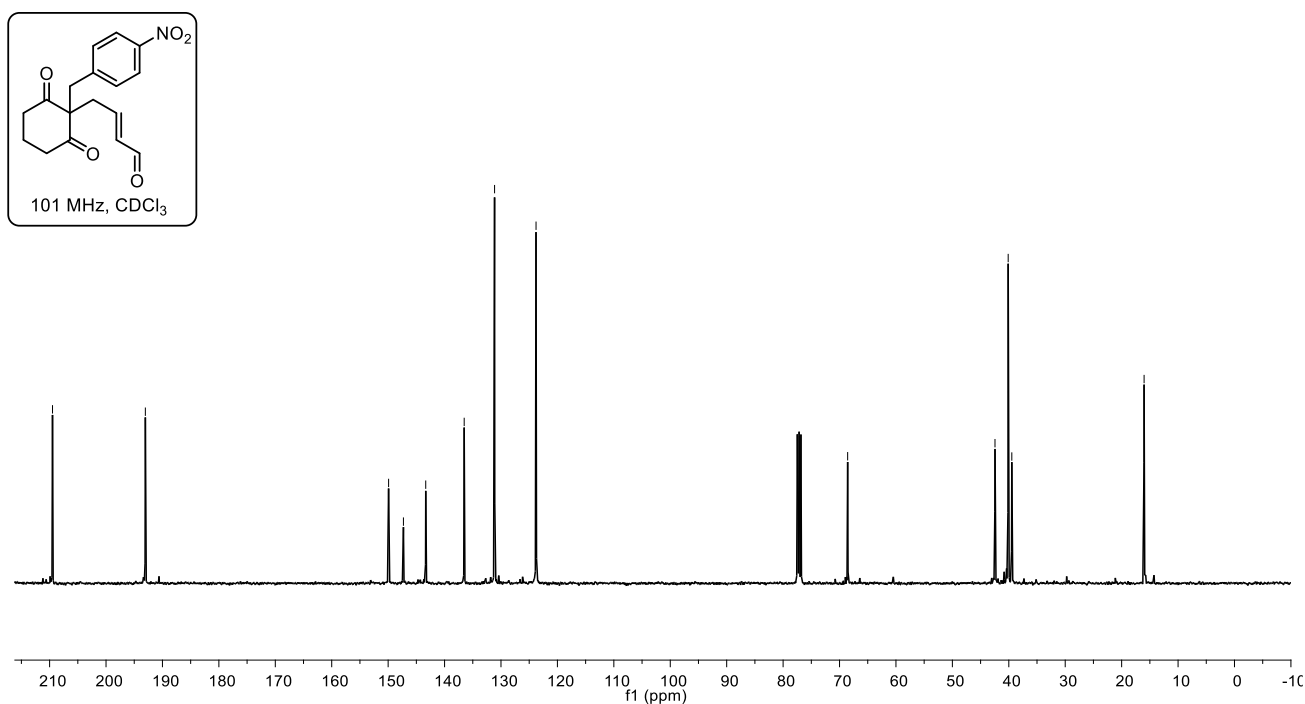

# 4-(1-(3-Methoxybenzyl)-2,6-dioxocyclohexyl)but-2-enal (1n):

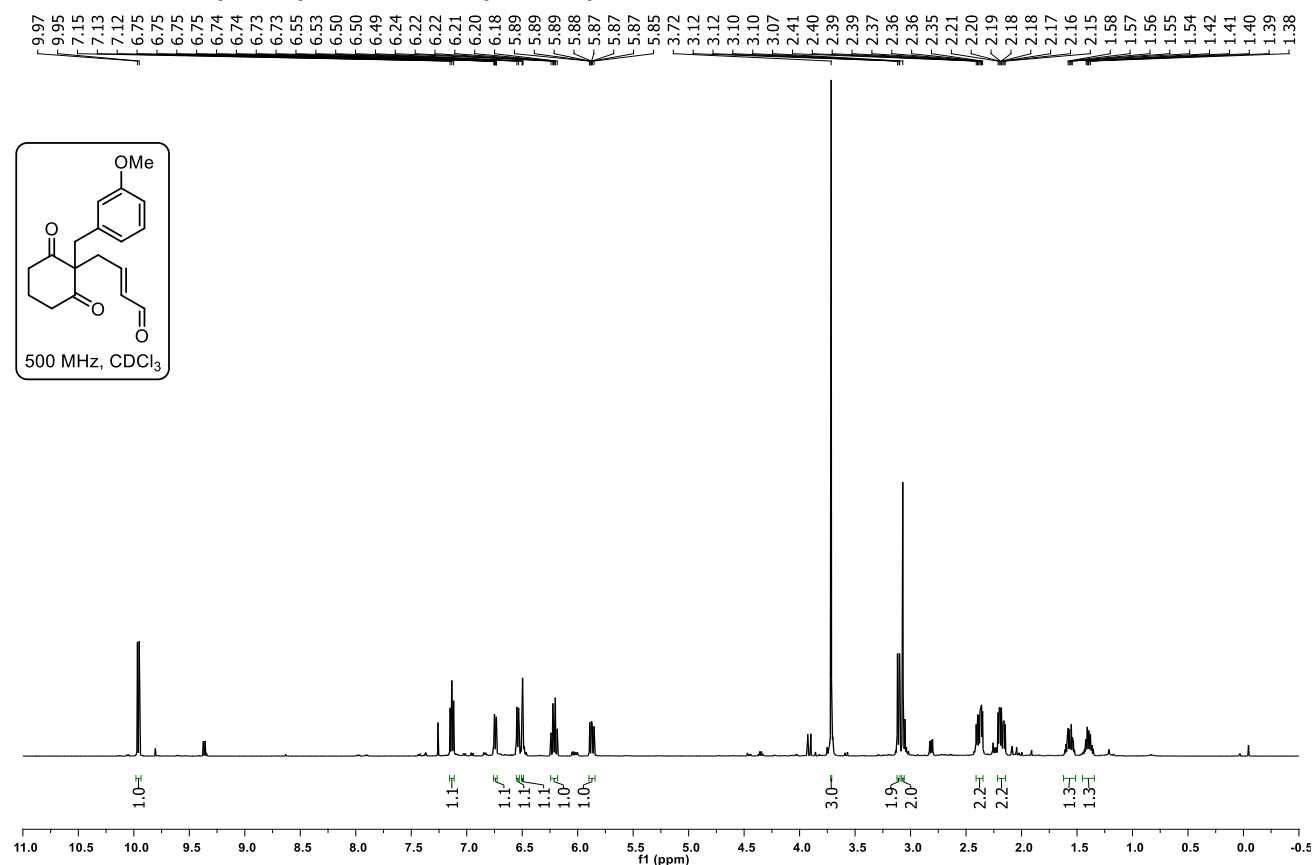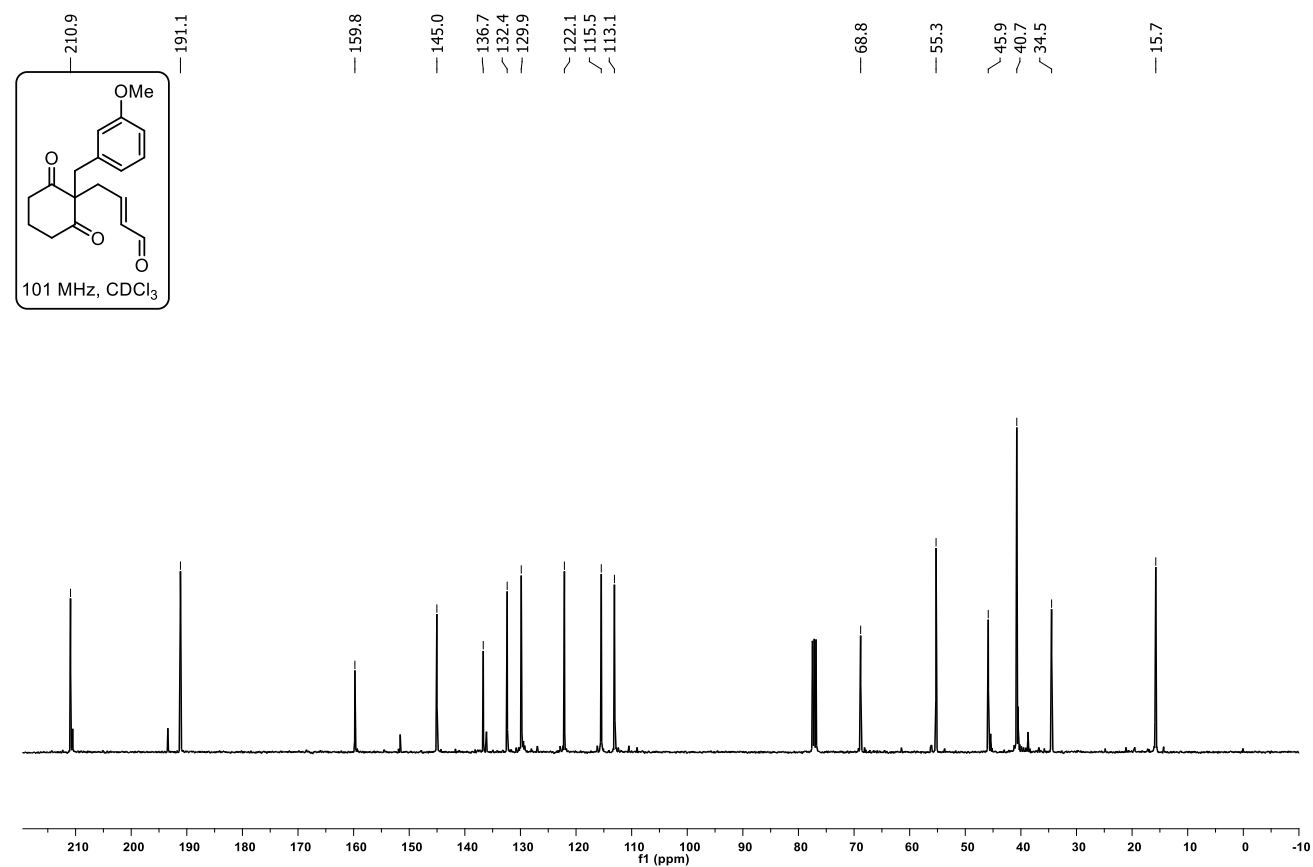

**4-(1-(3-Fluorobenzyl)-2,6-dioxocyclohexyl)but-2-enal(1o):**

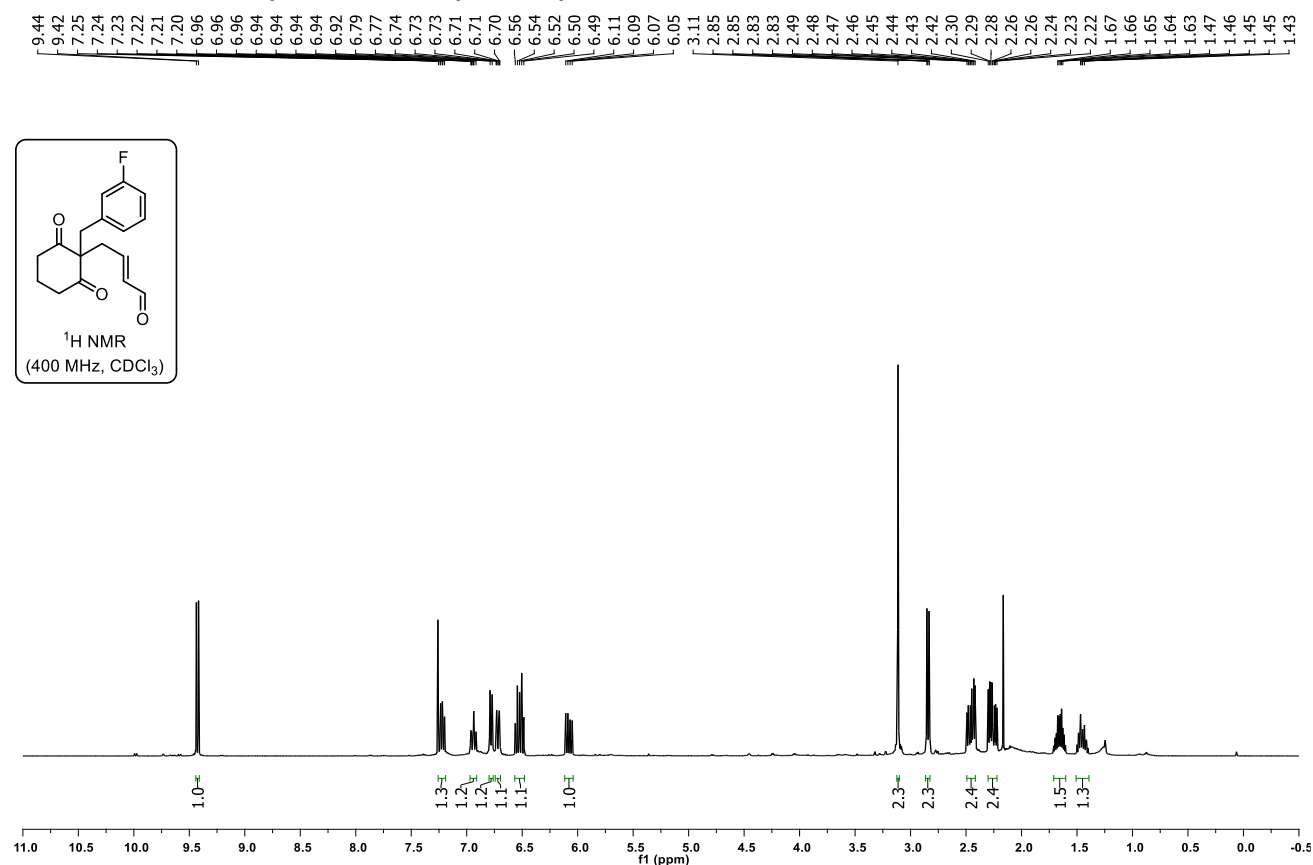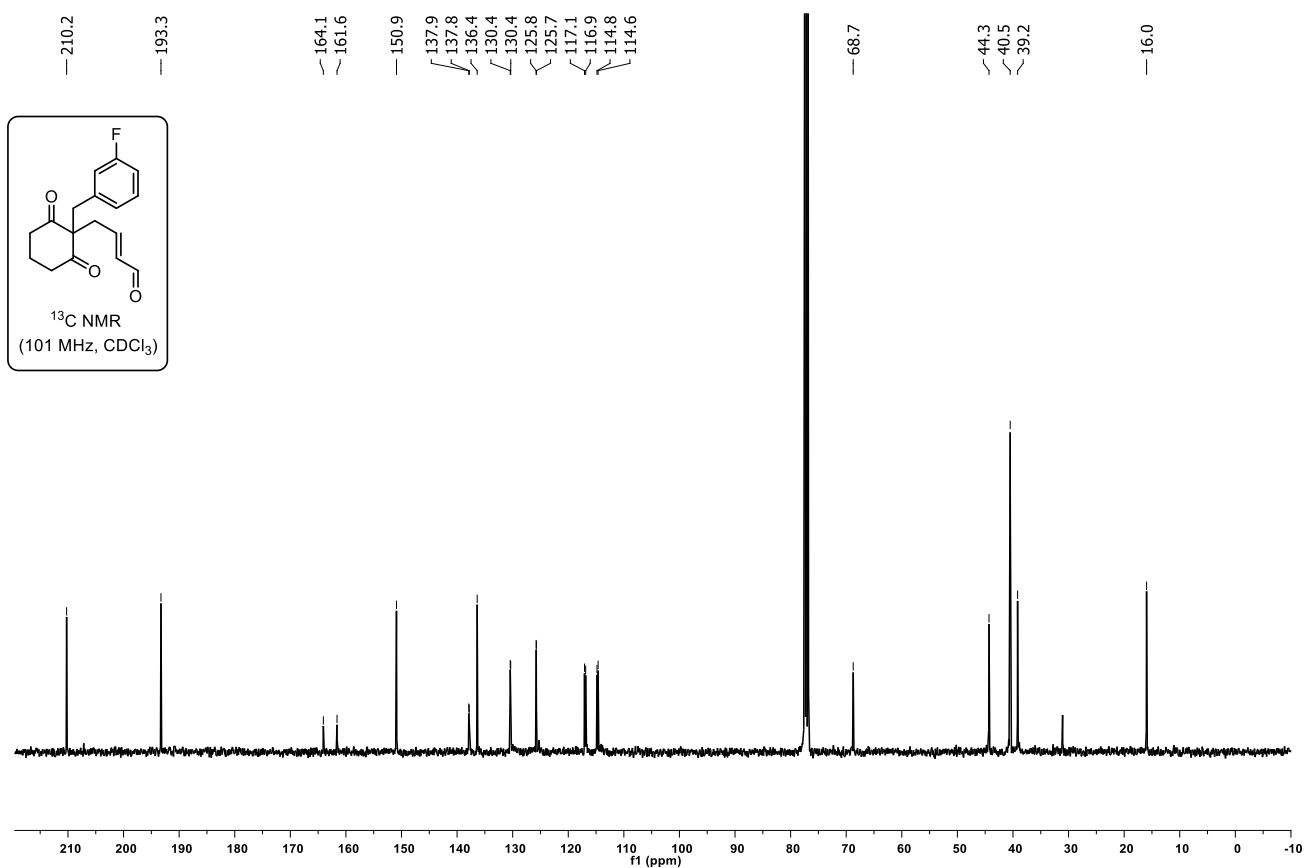

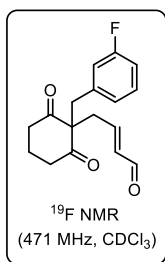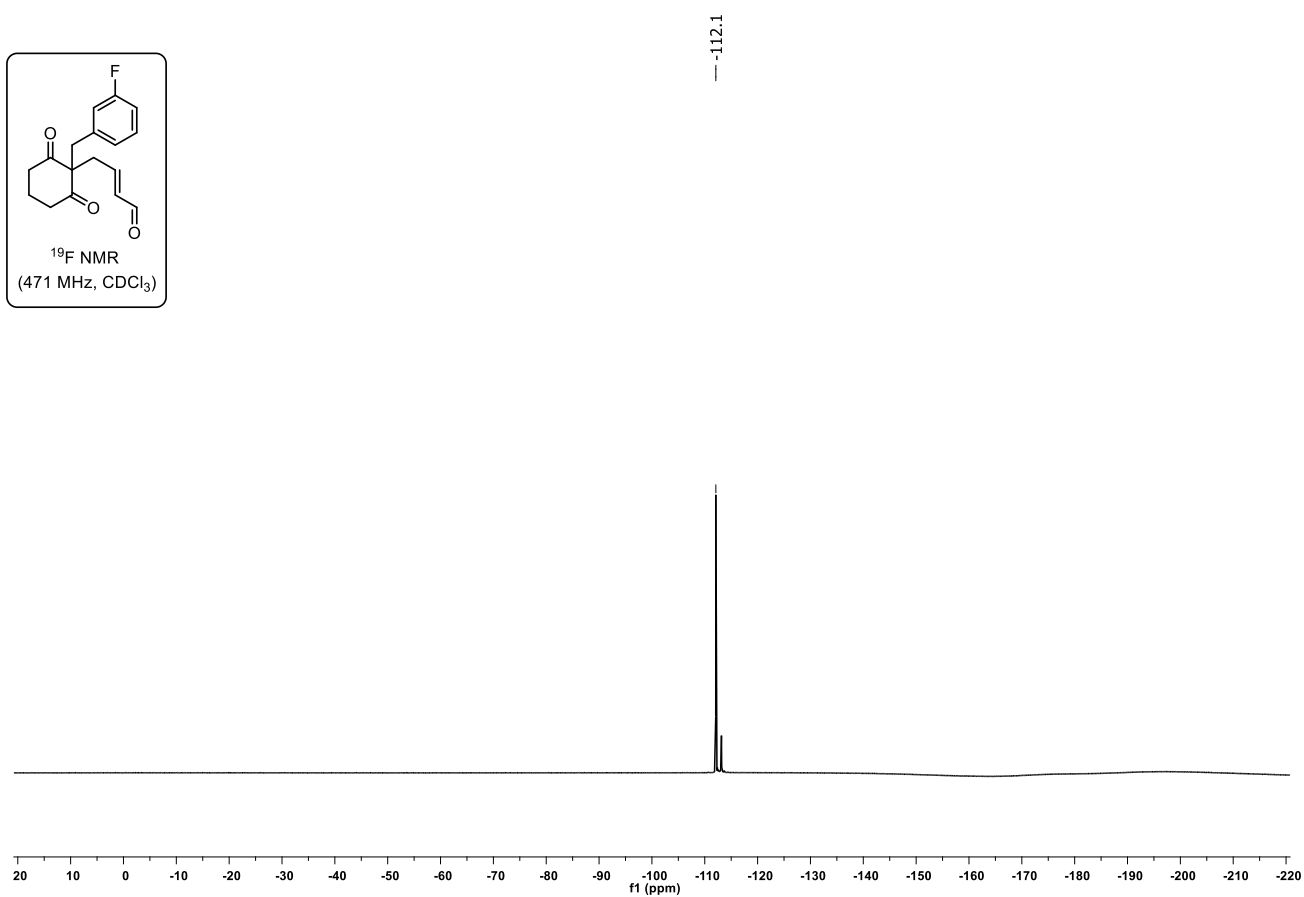

**4-(1-(3-Chlorobenzyl)-2,6-dioxocyclohexyl)but-2-enal (1p):**

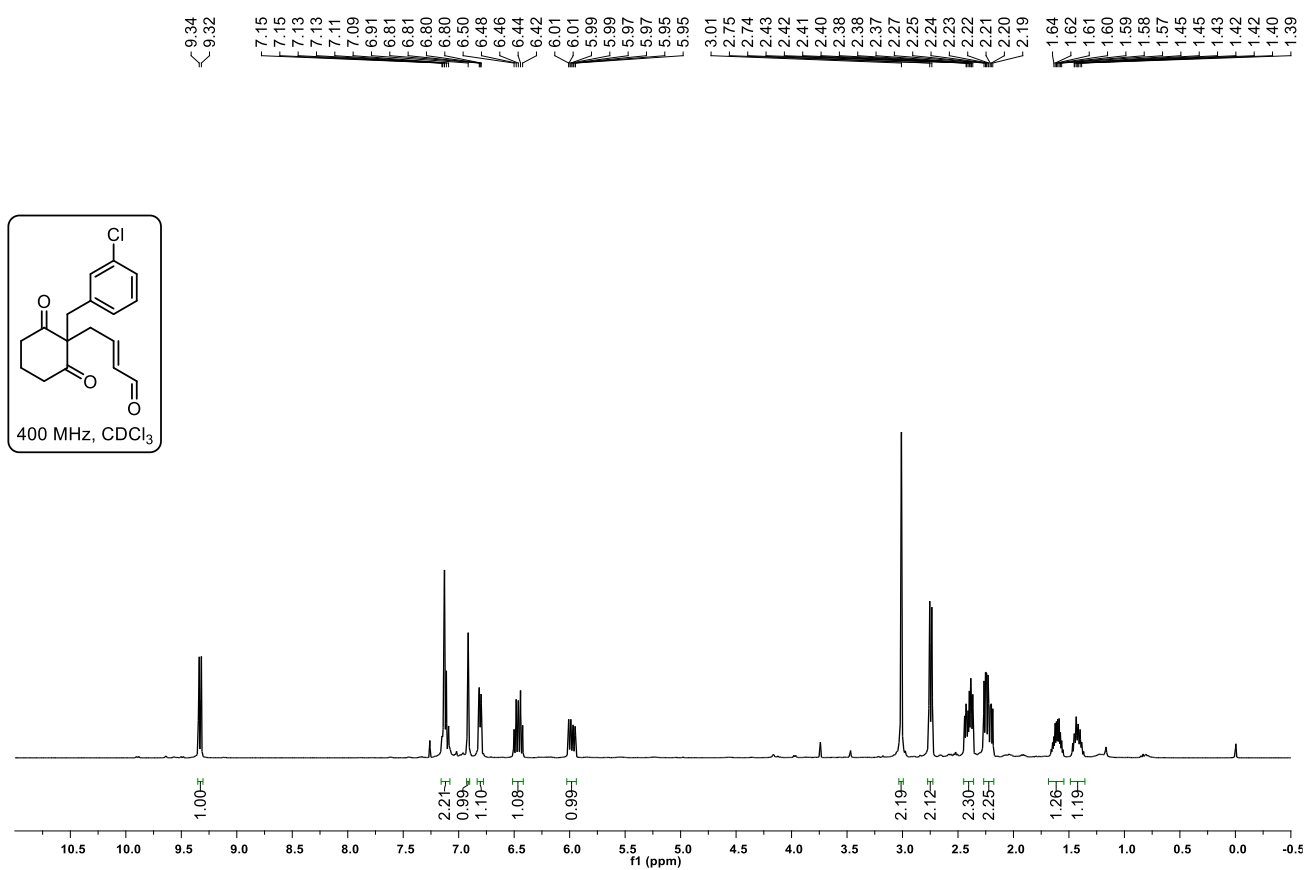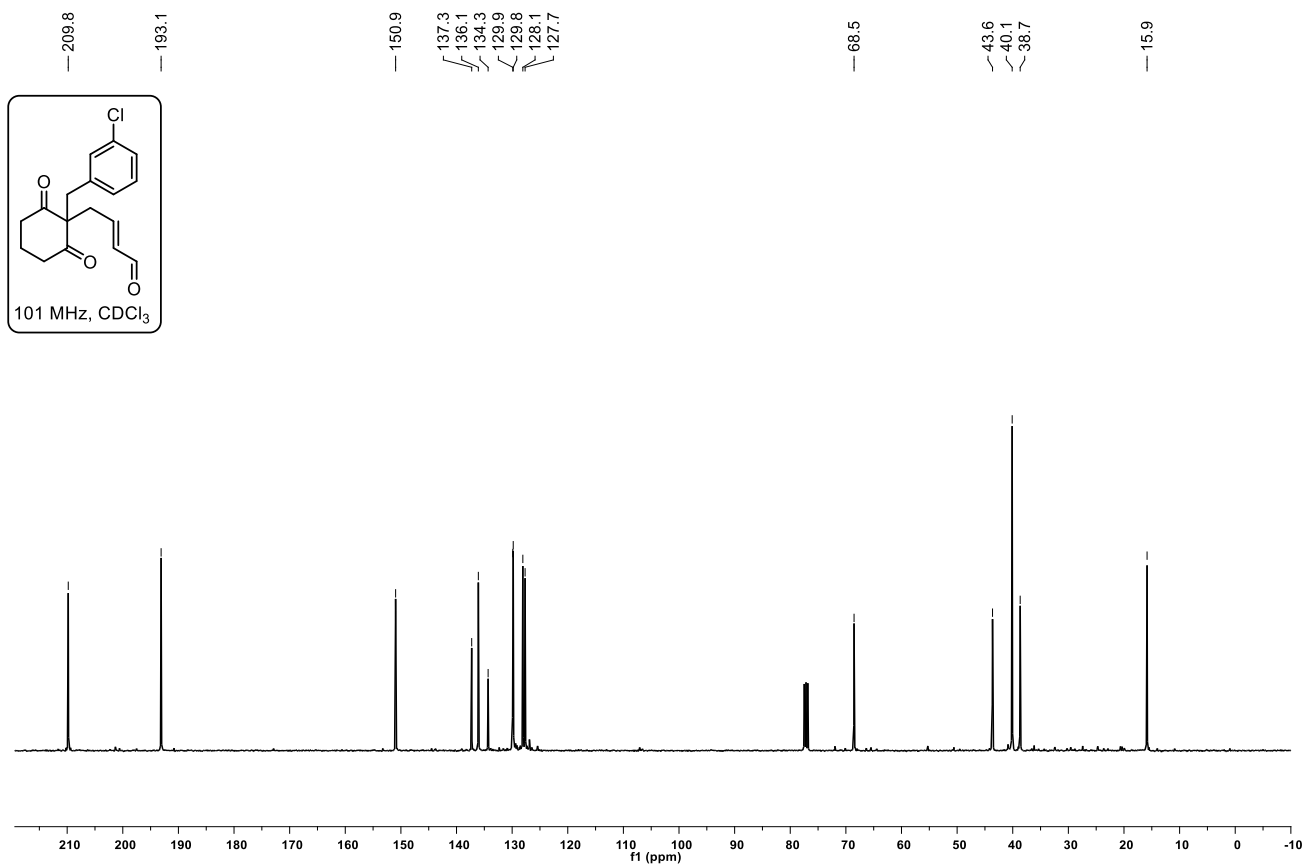

**4-(1-(3-Bromobenzyl)-2,6-dioxocyclohexyl)but-2-enal (1q):**

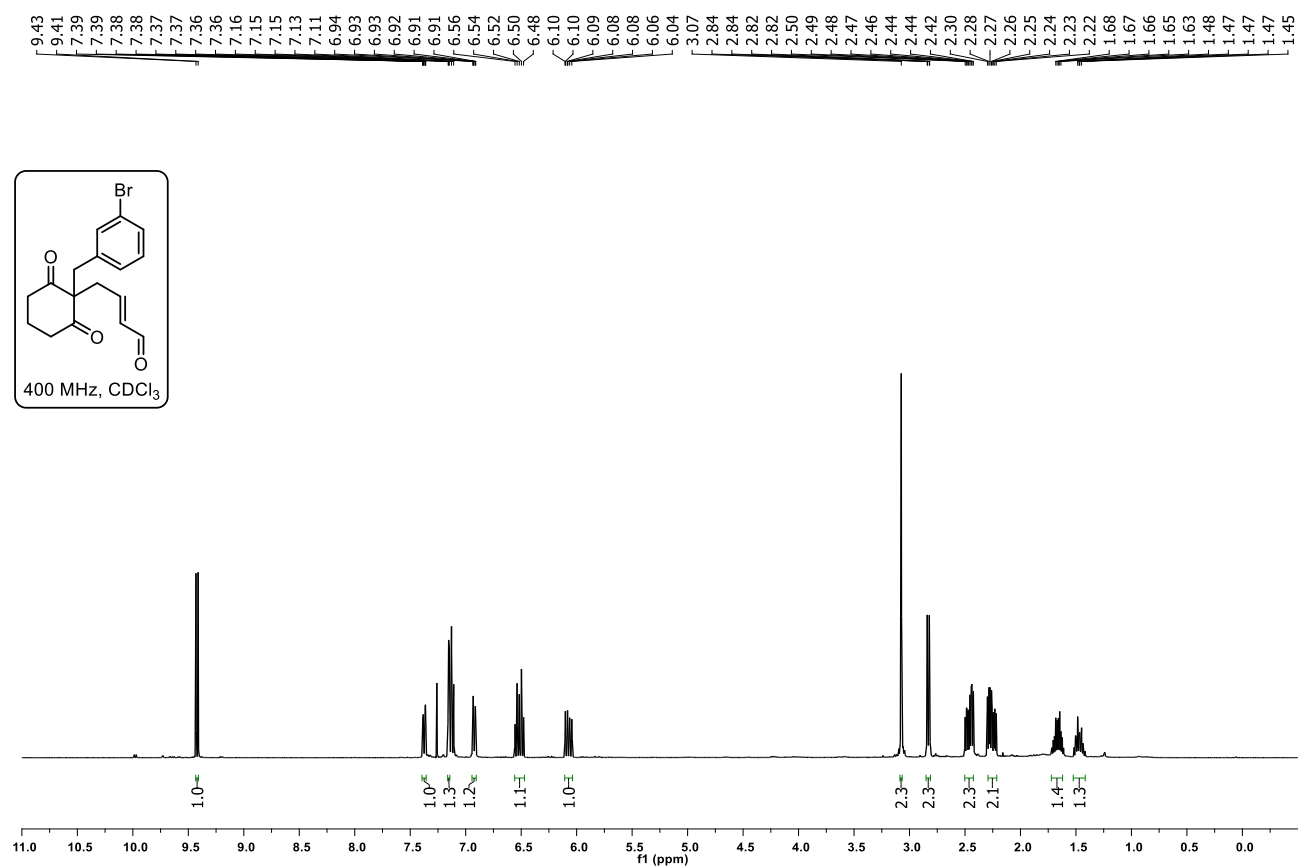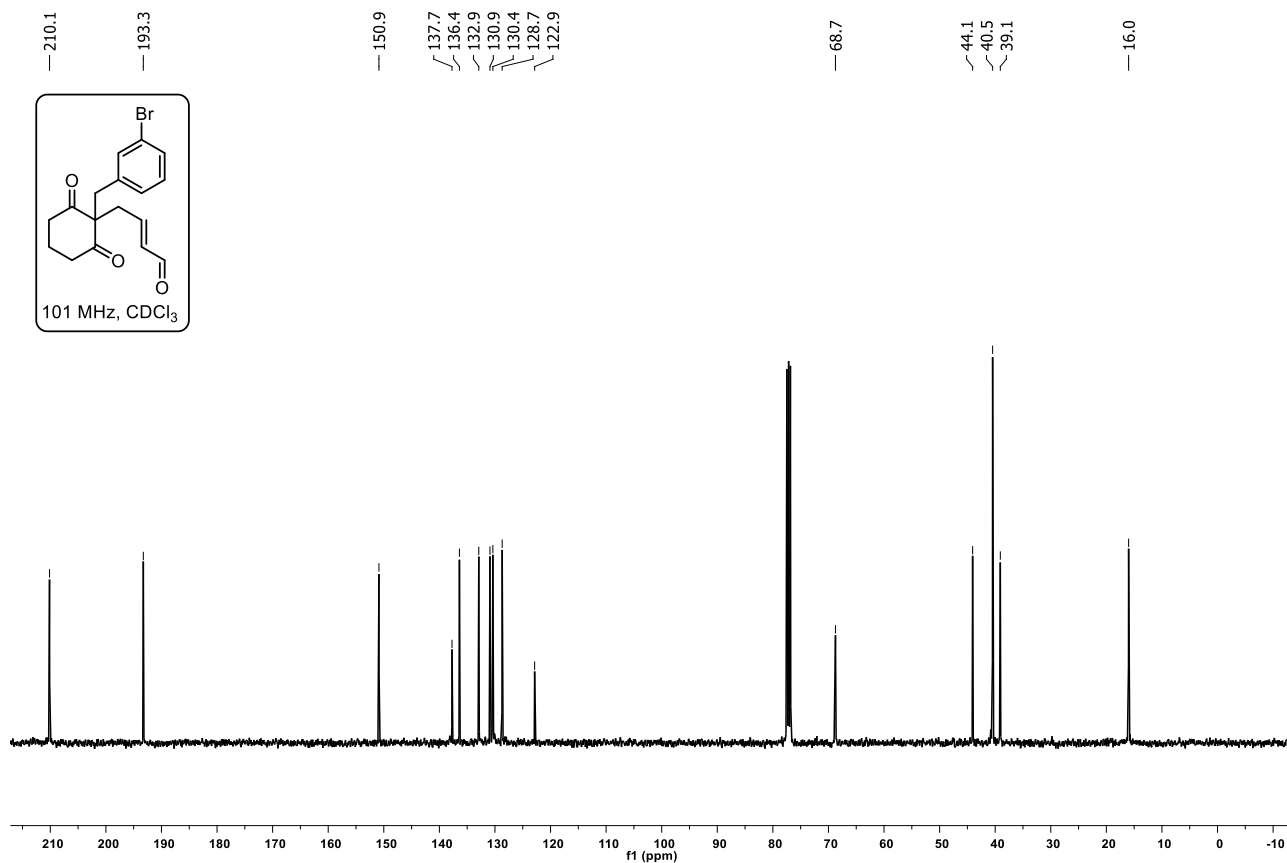

**4-(1-(3-Nitrobenzyl)-2,6-dioxocyclohexyl)but-2-enal (1j):**

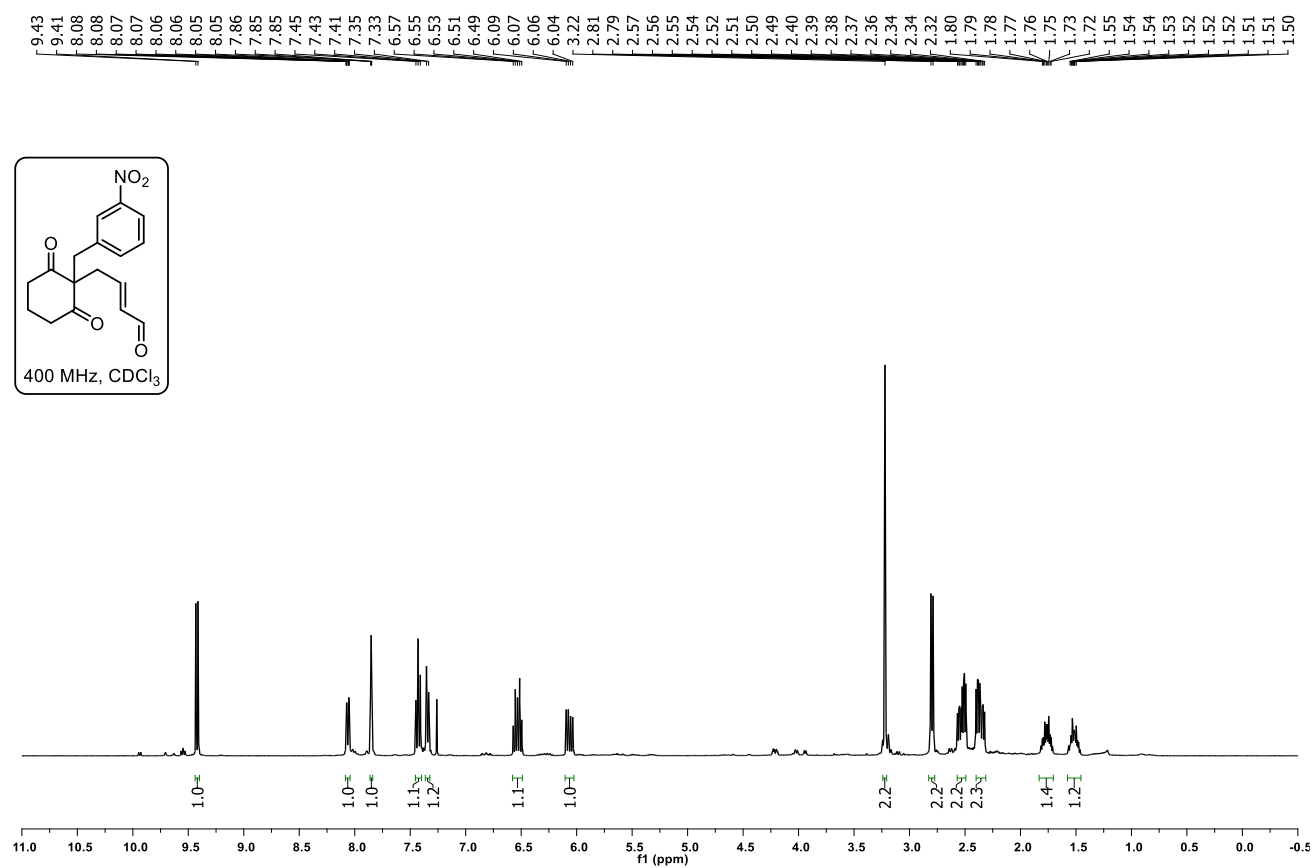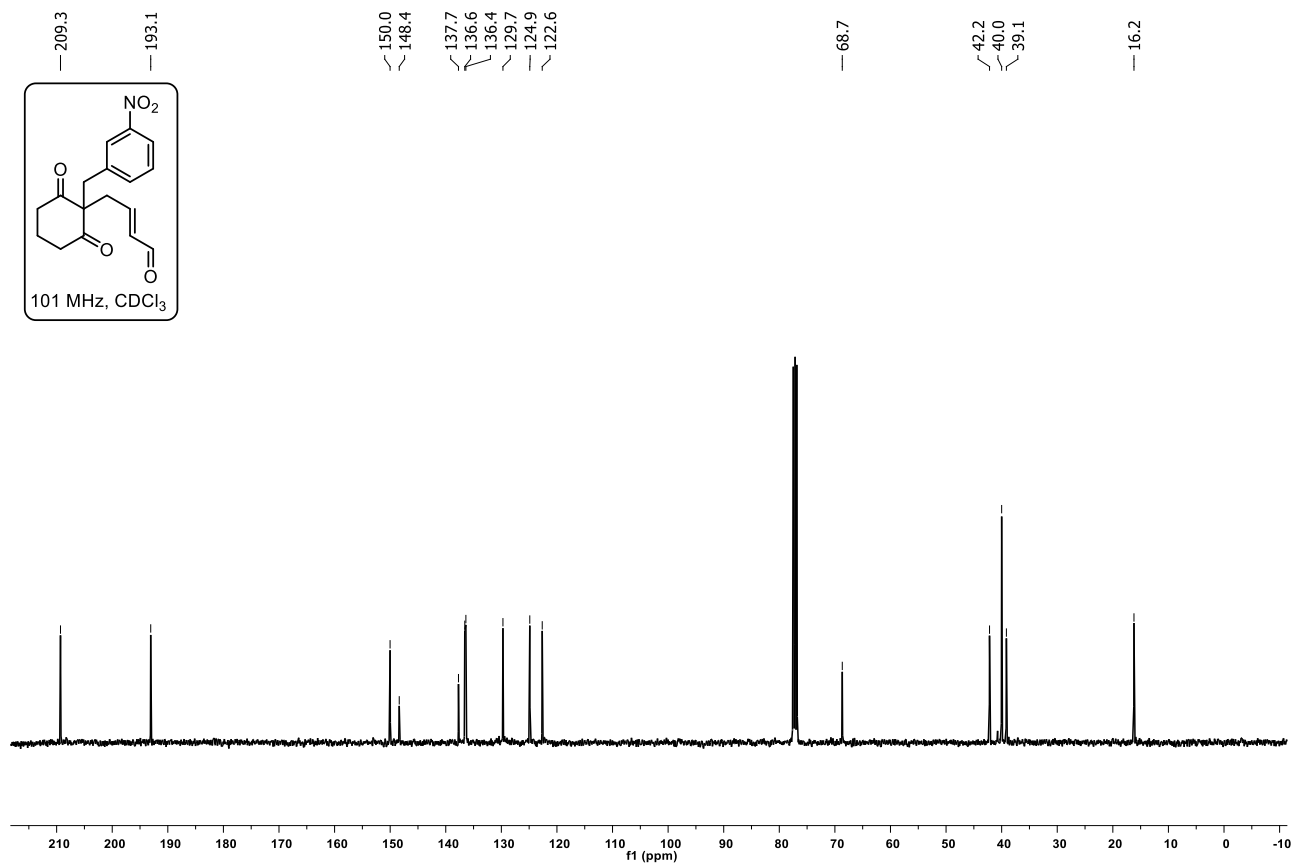

# 4-(1-(2-Chlorobenzyl)-2,6-dioxocyclohexyl)but-2-enal (1s):

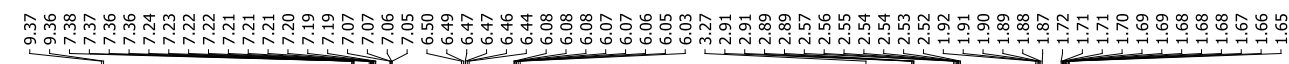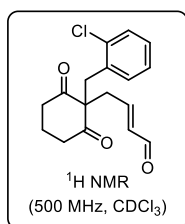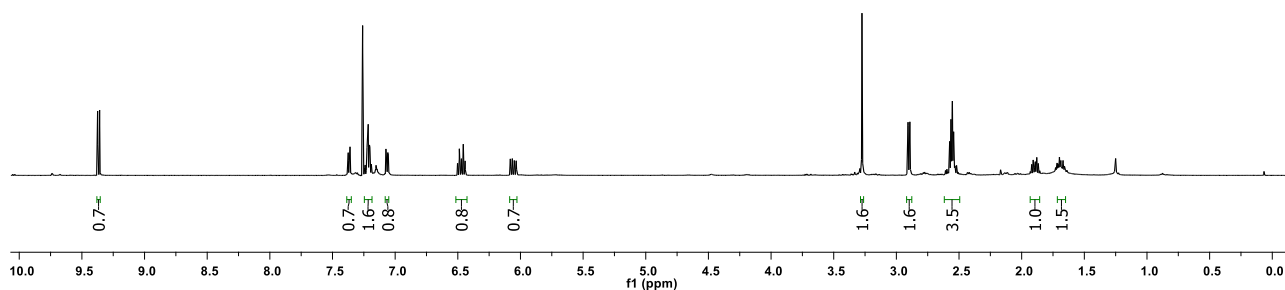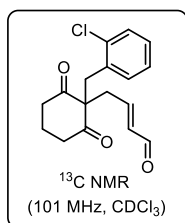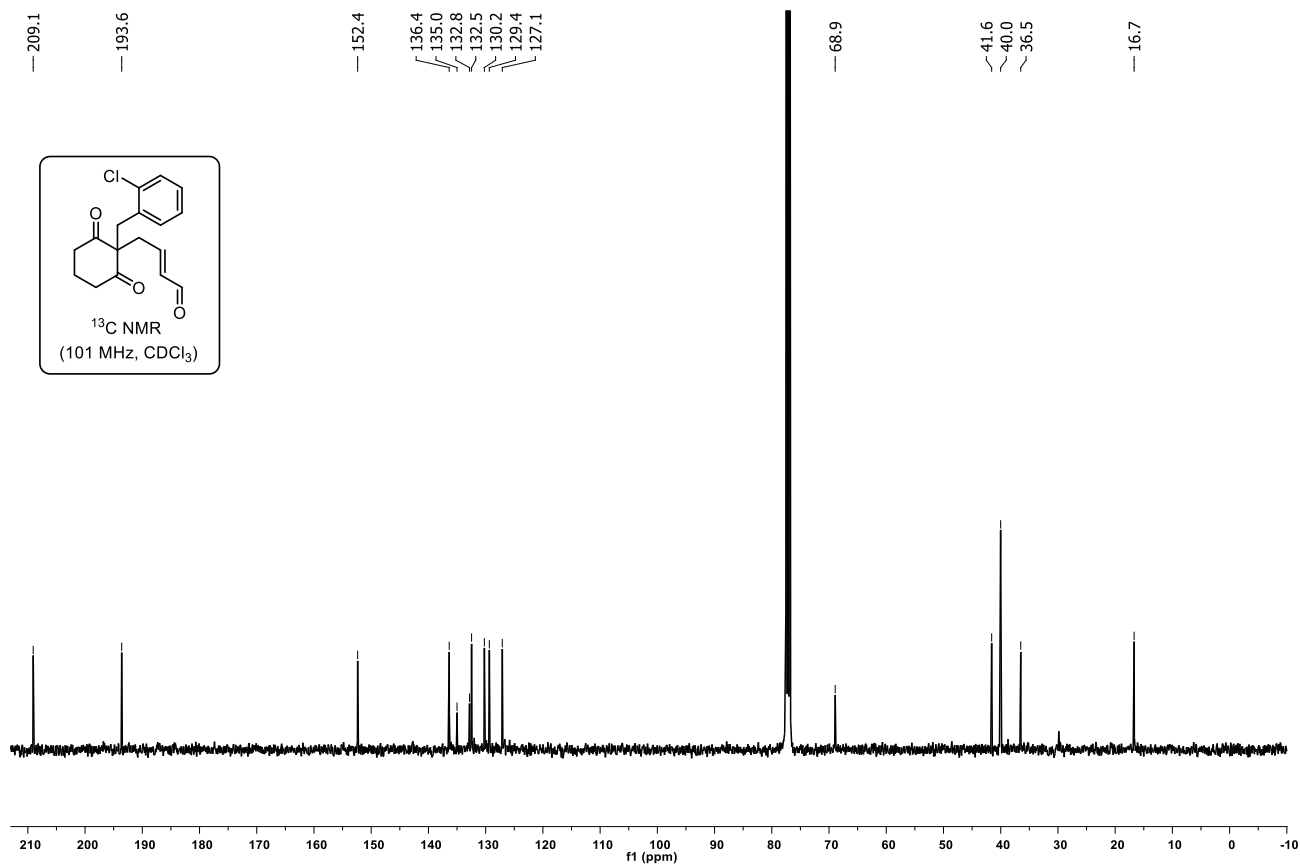

**4-(1-(2-bromobenzyl)-2,6-dioxocyclohexyl)but-2-enal (1t):**

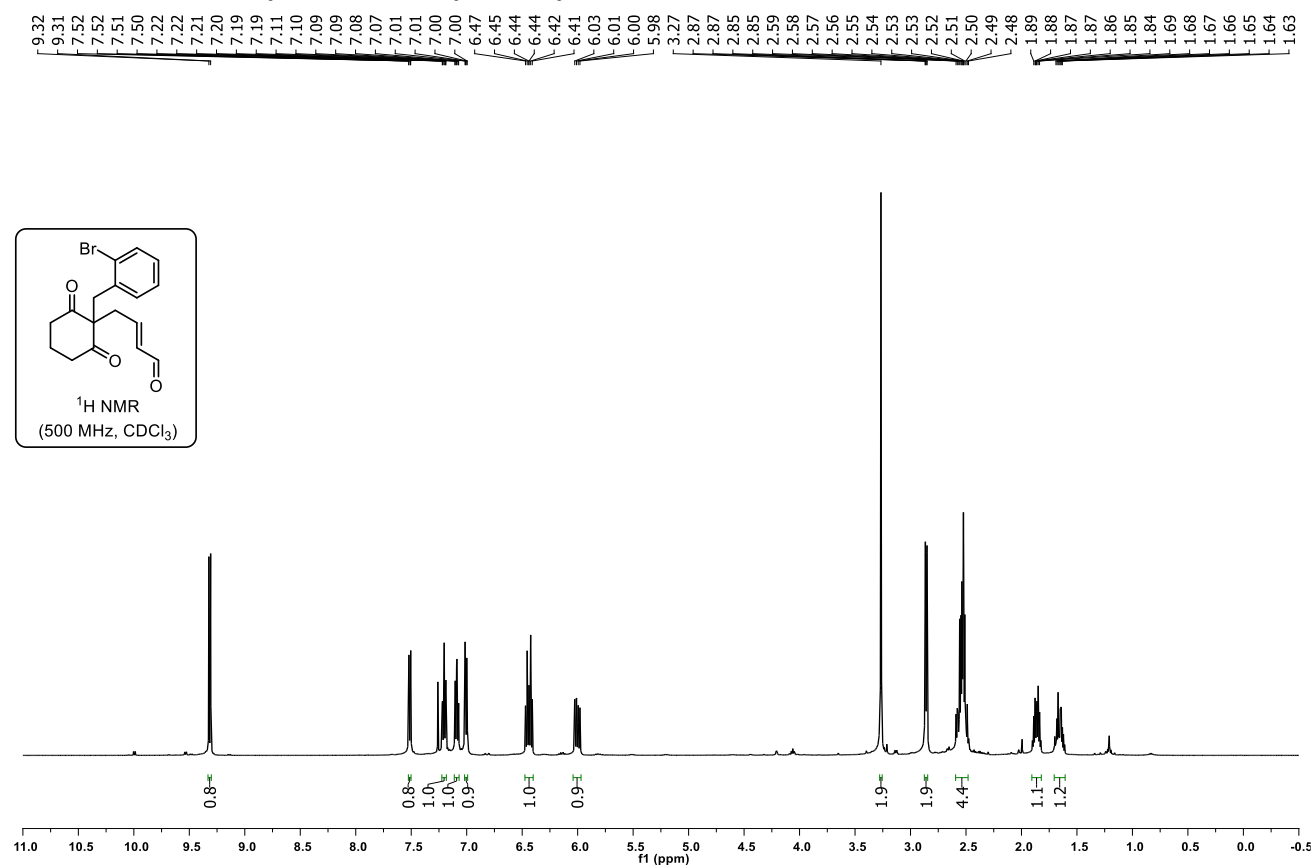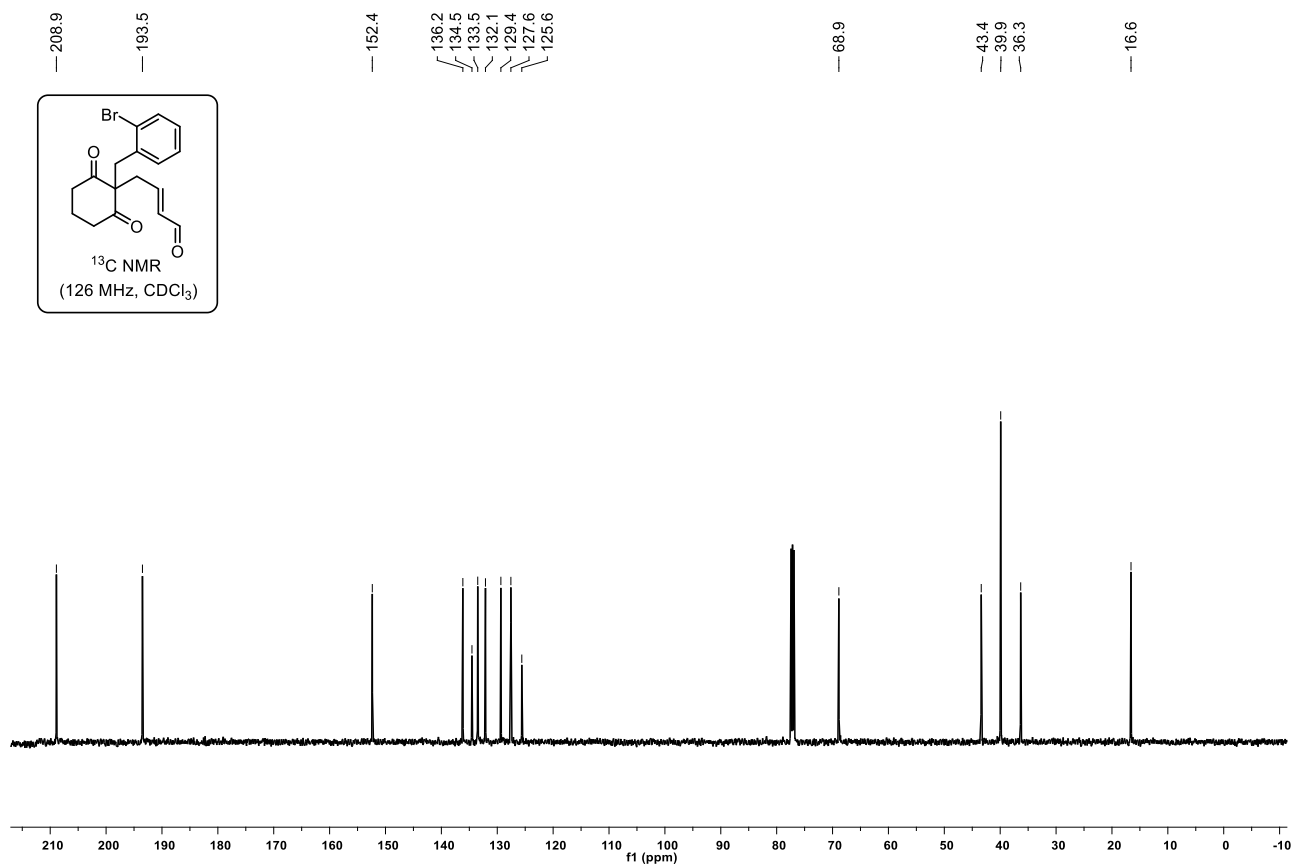

# 4-(1-(3,4-Dimethoxybenzyl)-2,6-dioxocyclohexyl)but-2-enal (1u):

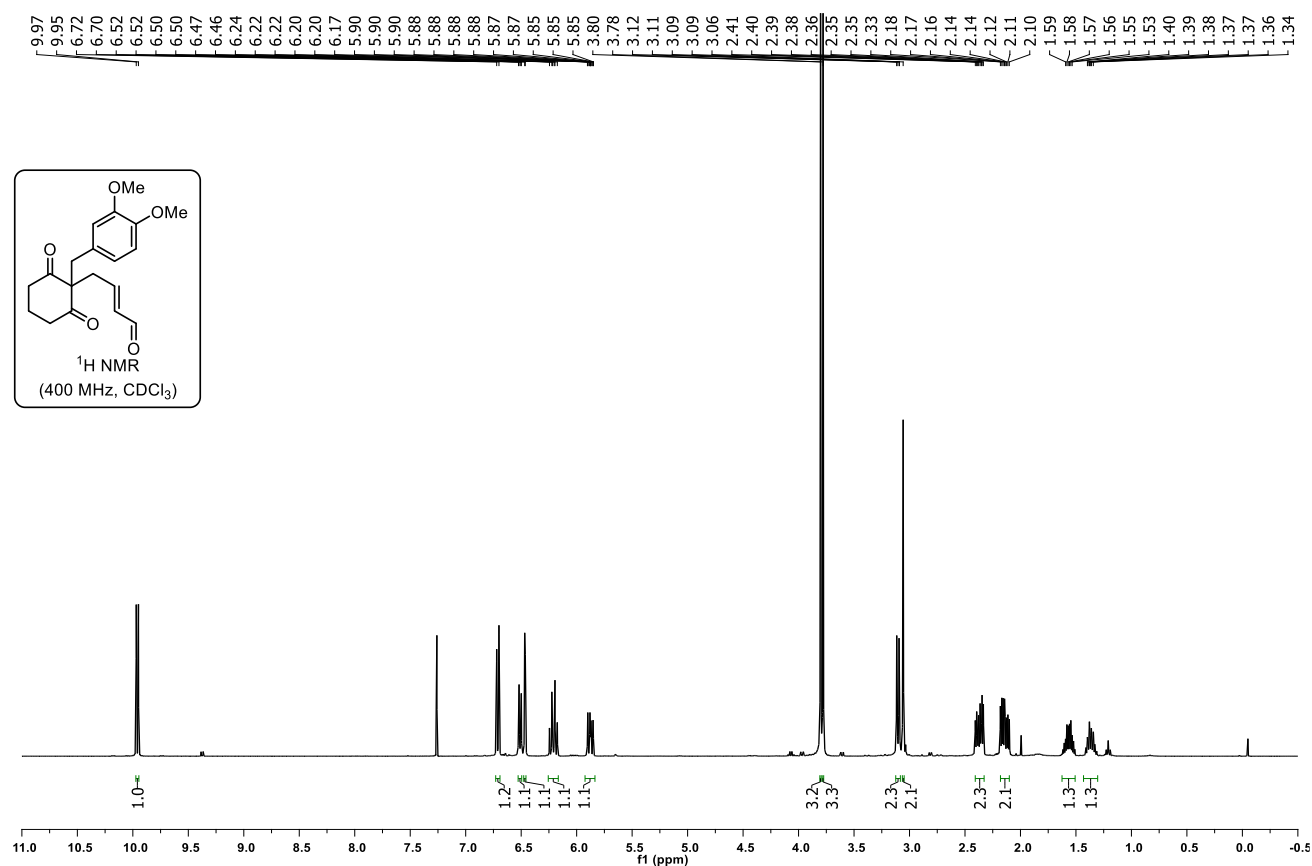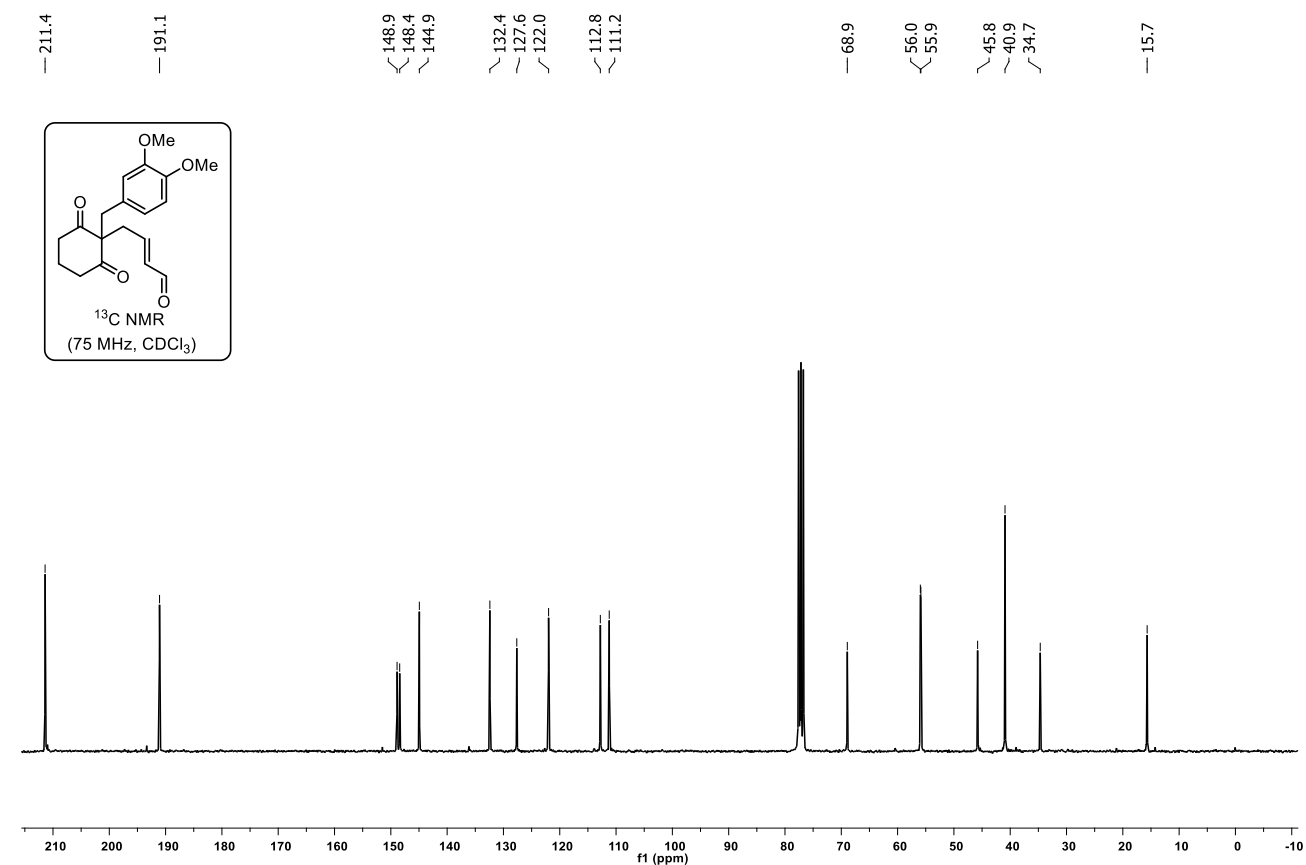

**4-(1-(2,3-Dichlorobenzyl)-2,6-dioxocyclohexyl)but-2-enal (1v):**

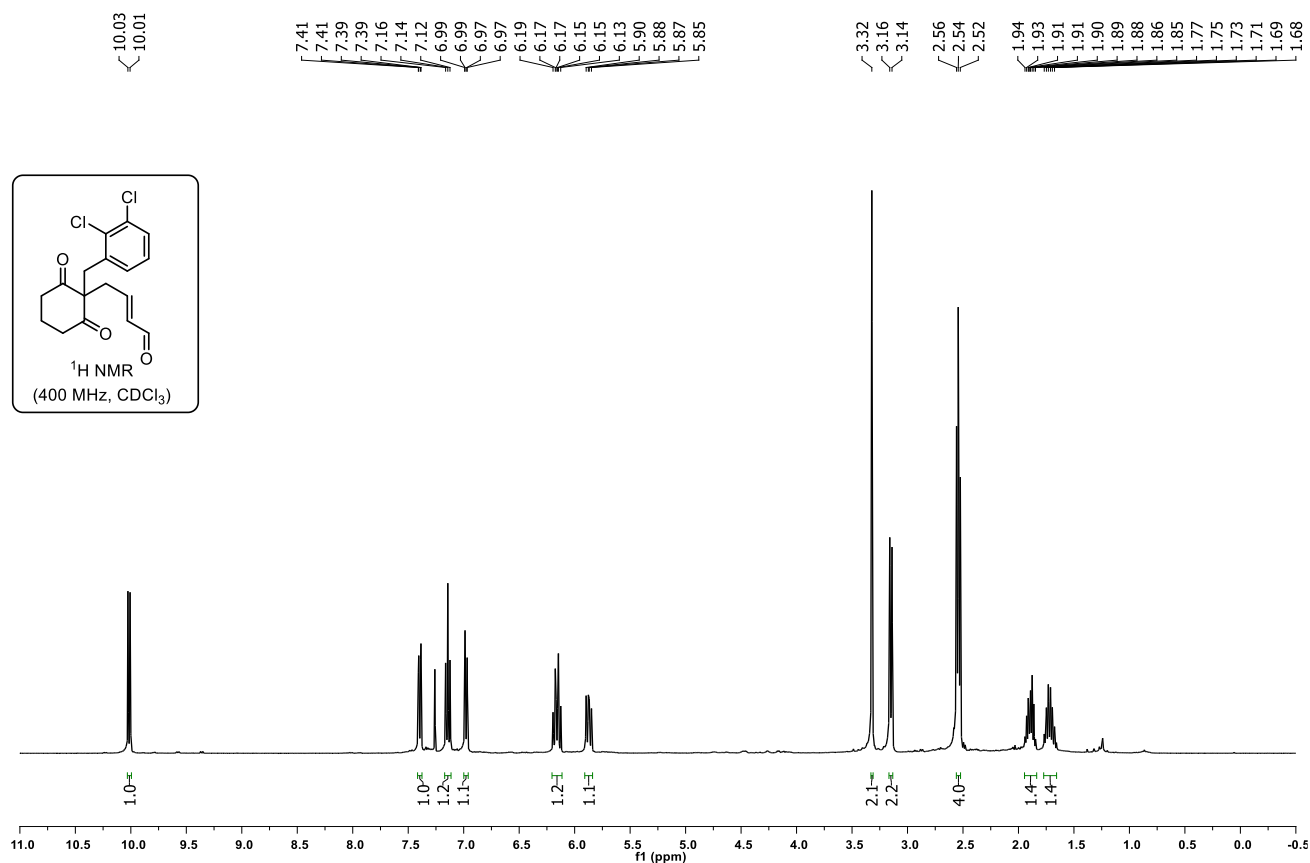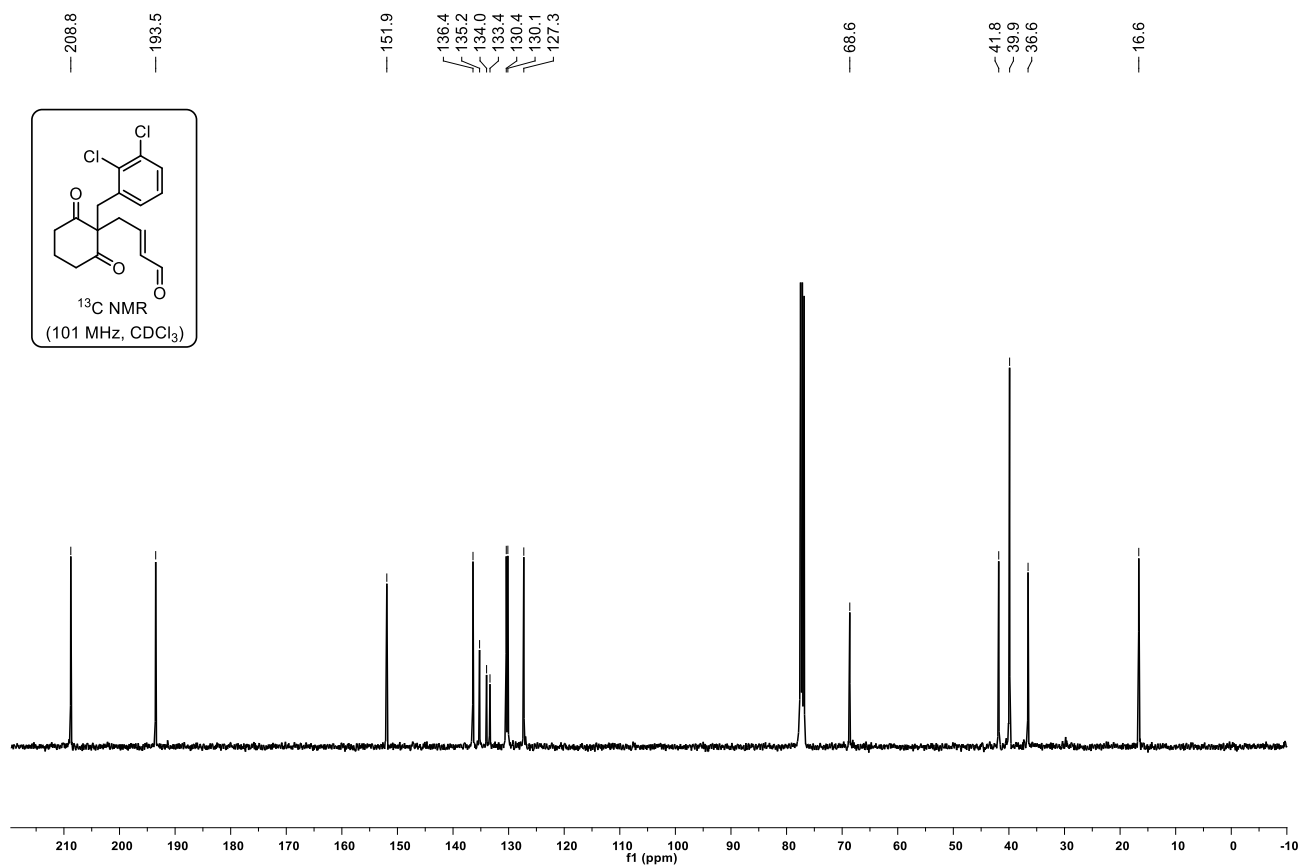

**4-(1-(Naphthalen-1-ylmethyl)-2,6-dioxocyclohexyl)but-2-enal (1w):**

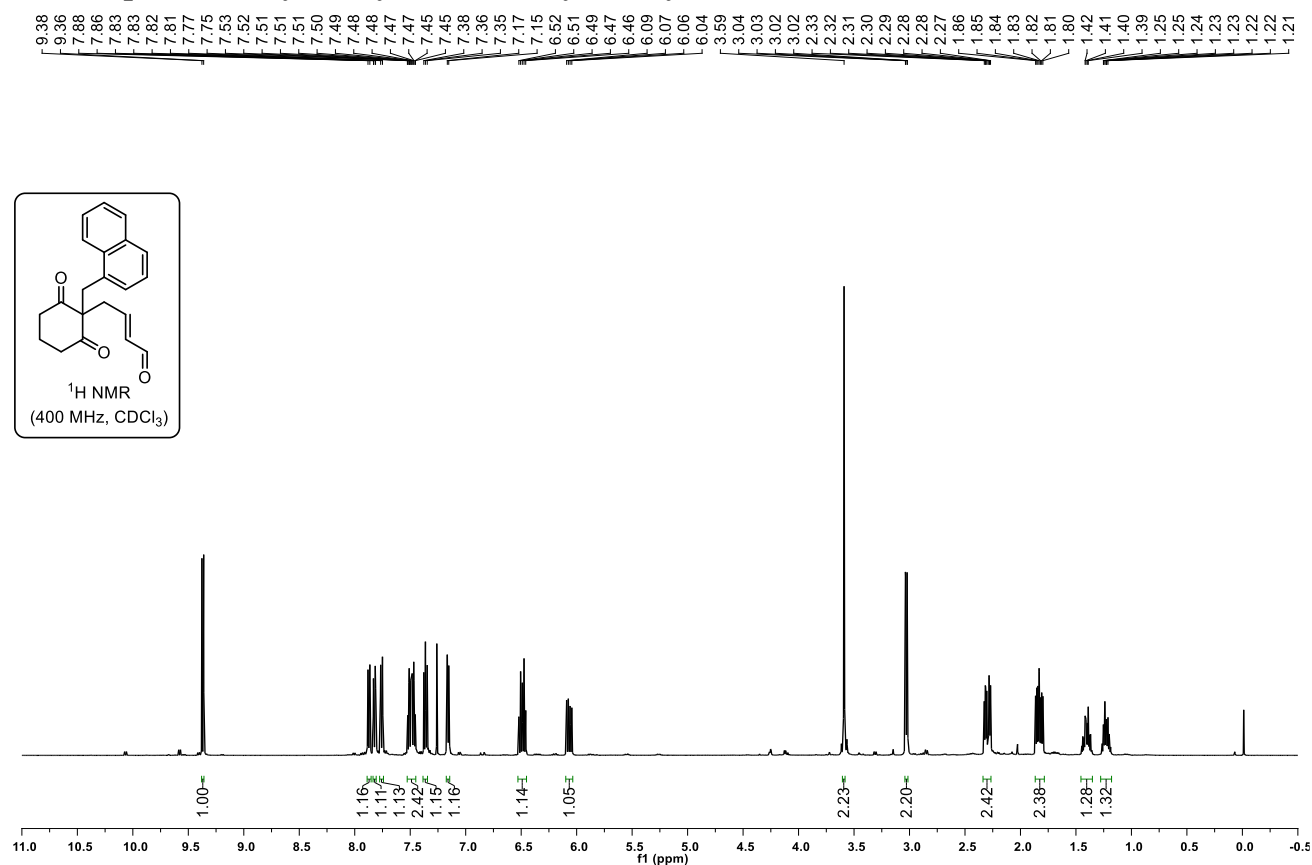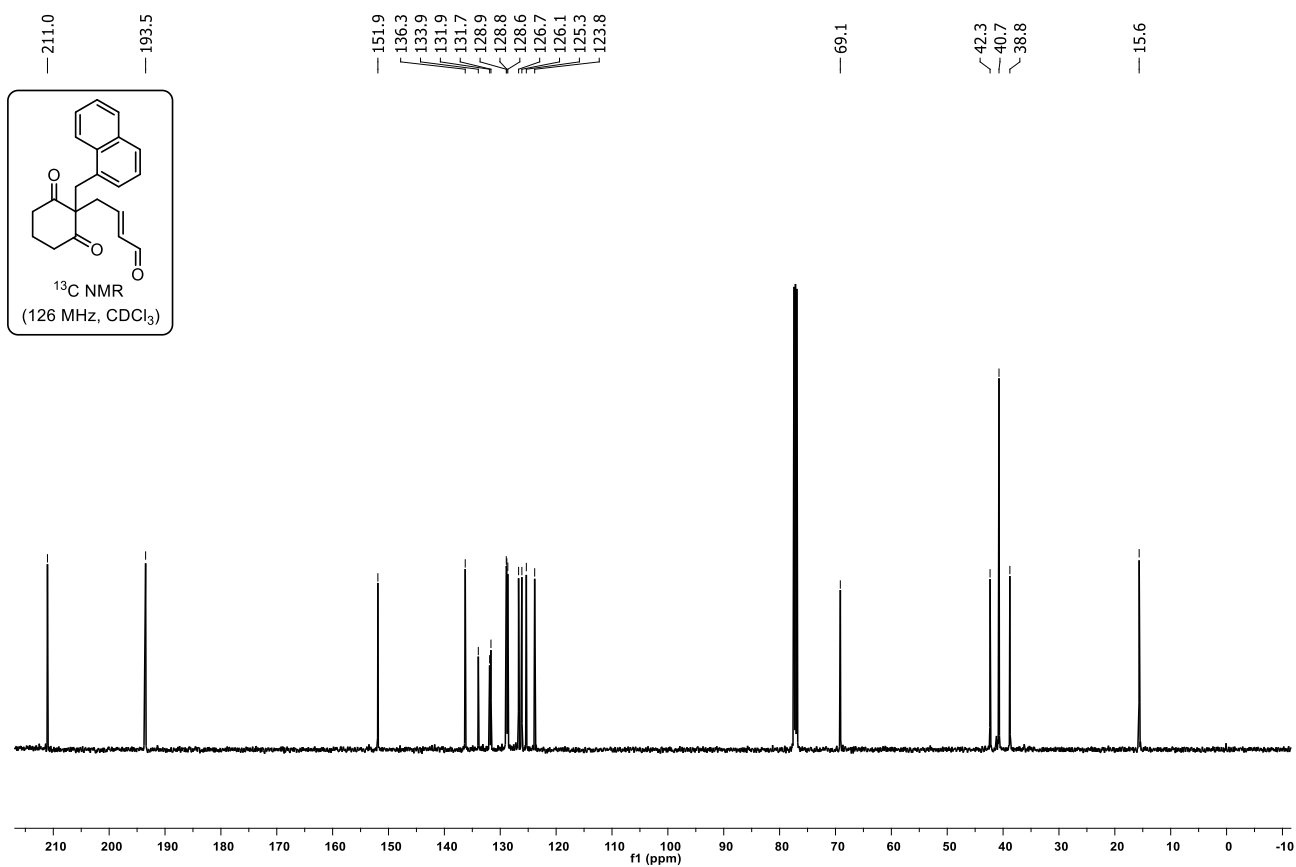

**4-(2,6-dioxo-1-(Thiophen-2-ylmethyl)cyclohexyl)but-2-enal (1x):**

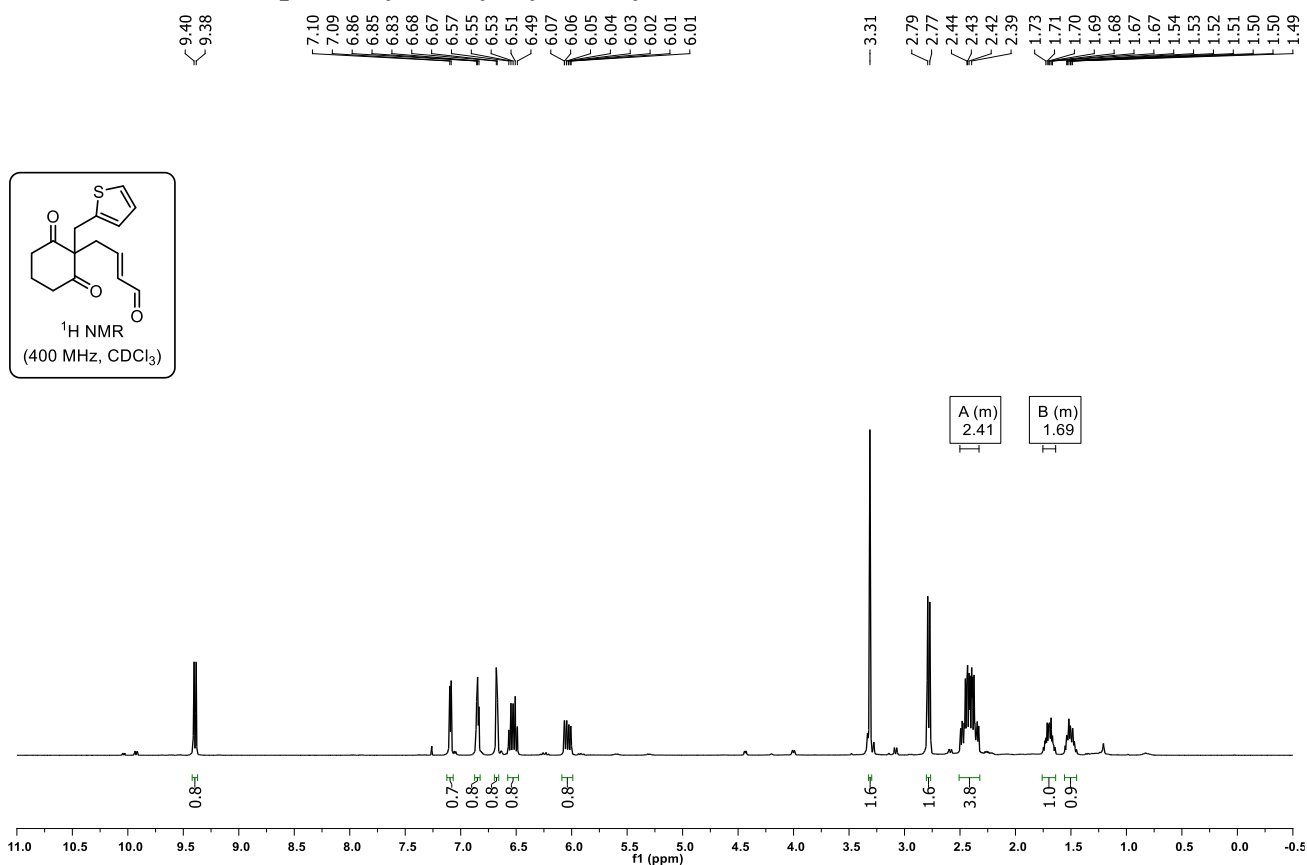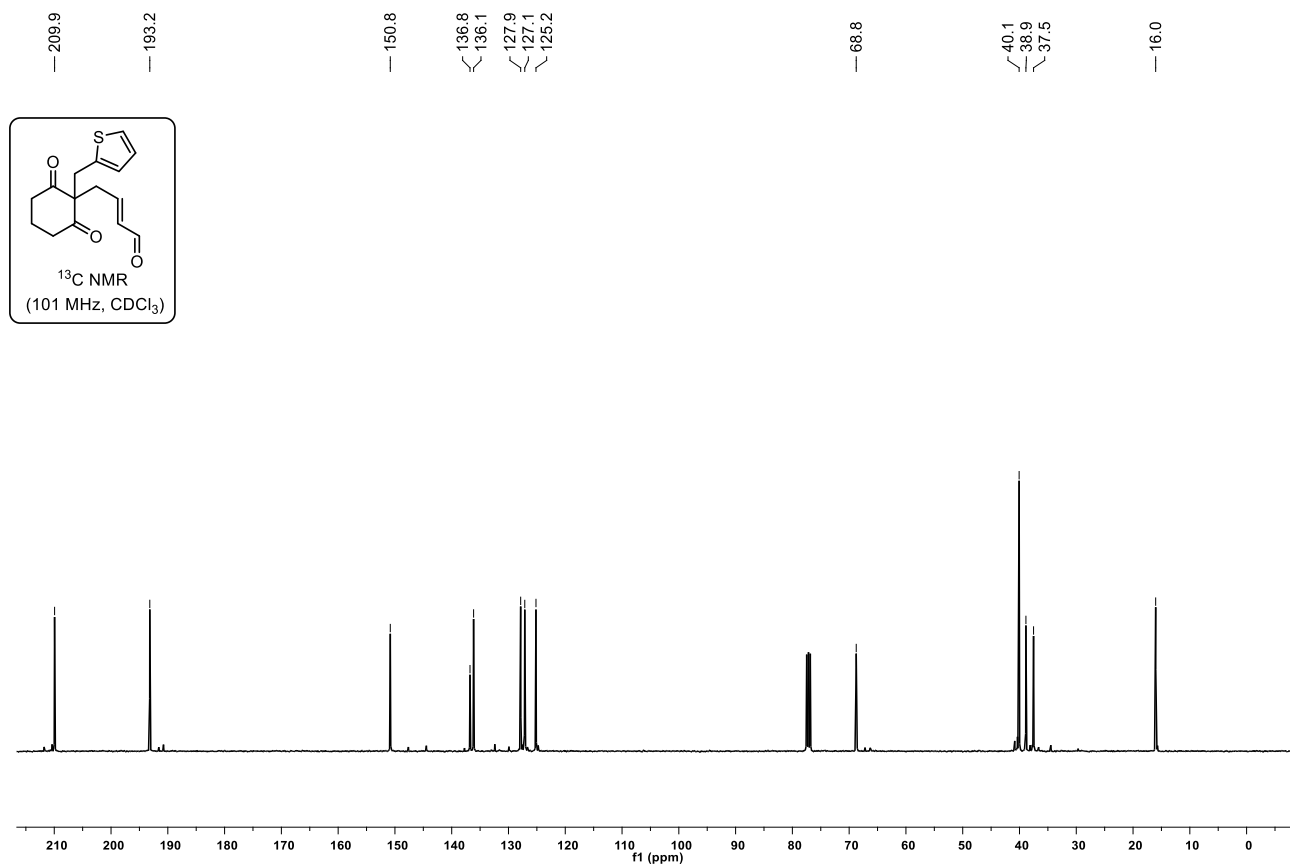

# 4-(1-(Furan-2-ylmethyl)-2,6-dioxocyclohexyl)but-2-enal (1y):

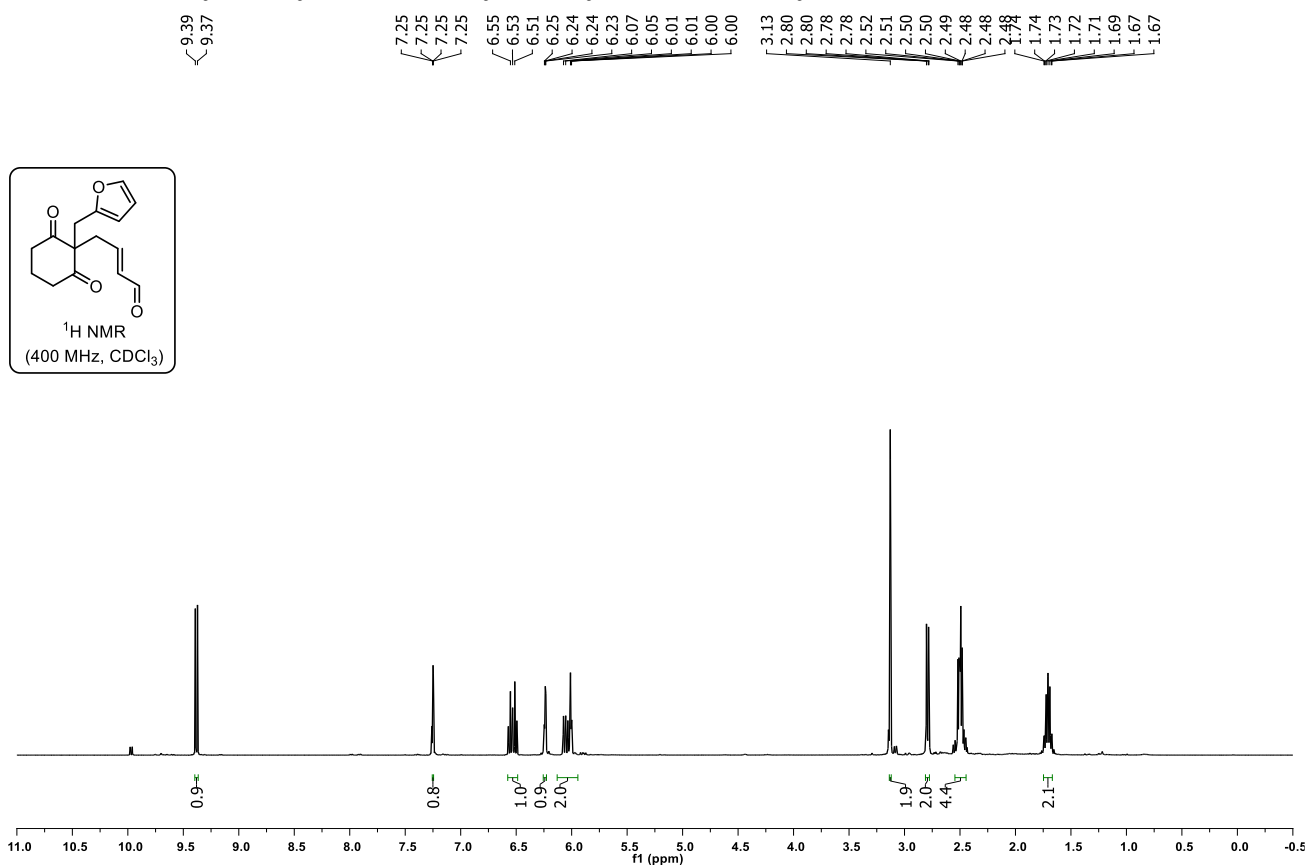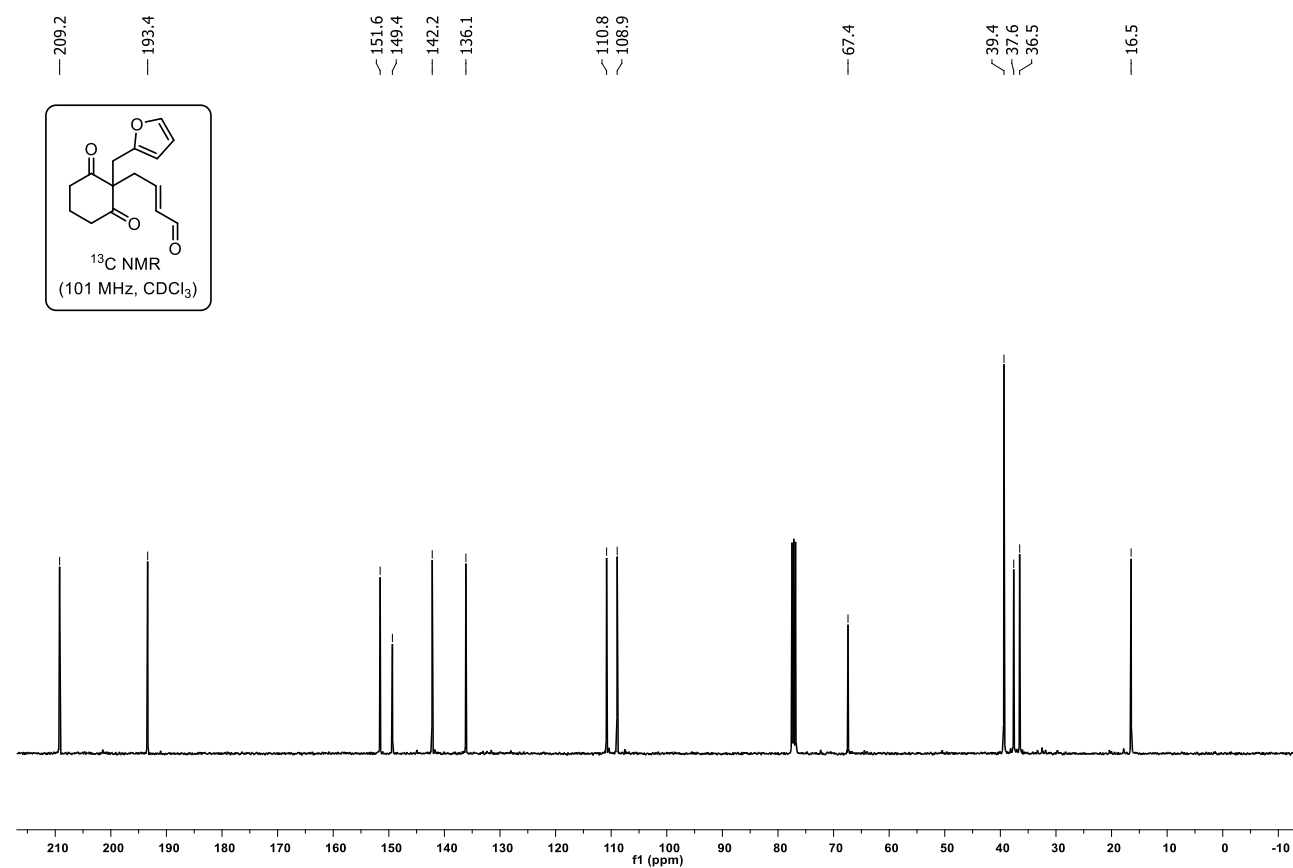

# 4-(1-methyl-2,5-dioxocyclopentyl)but-2-enal (1z):

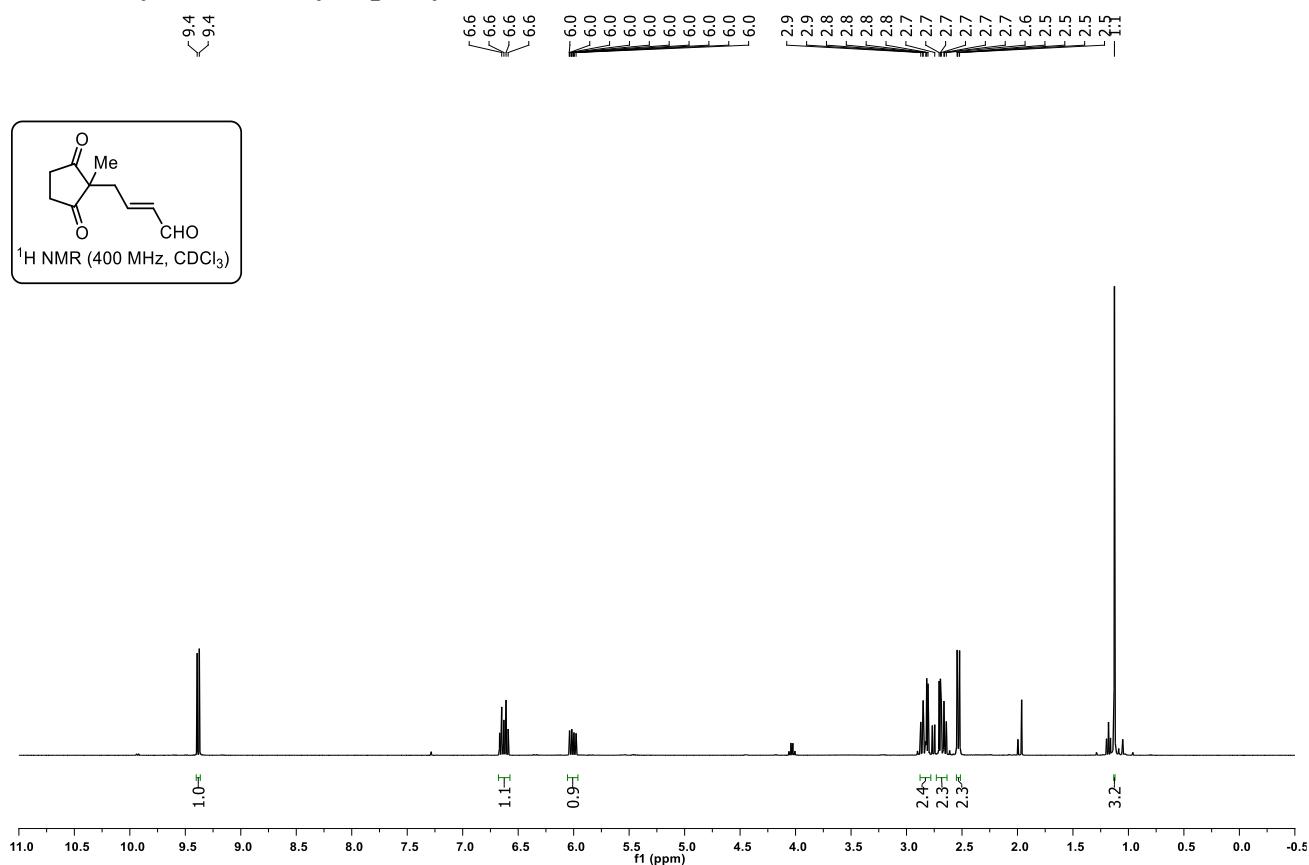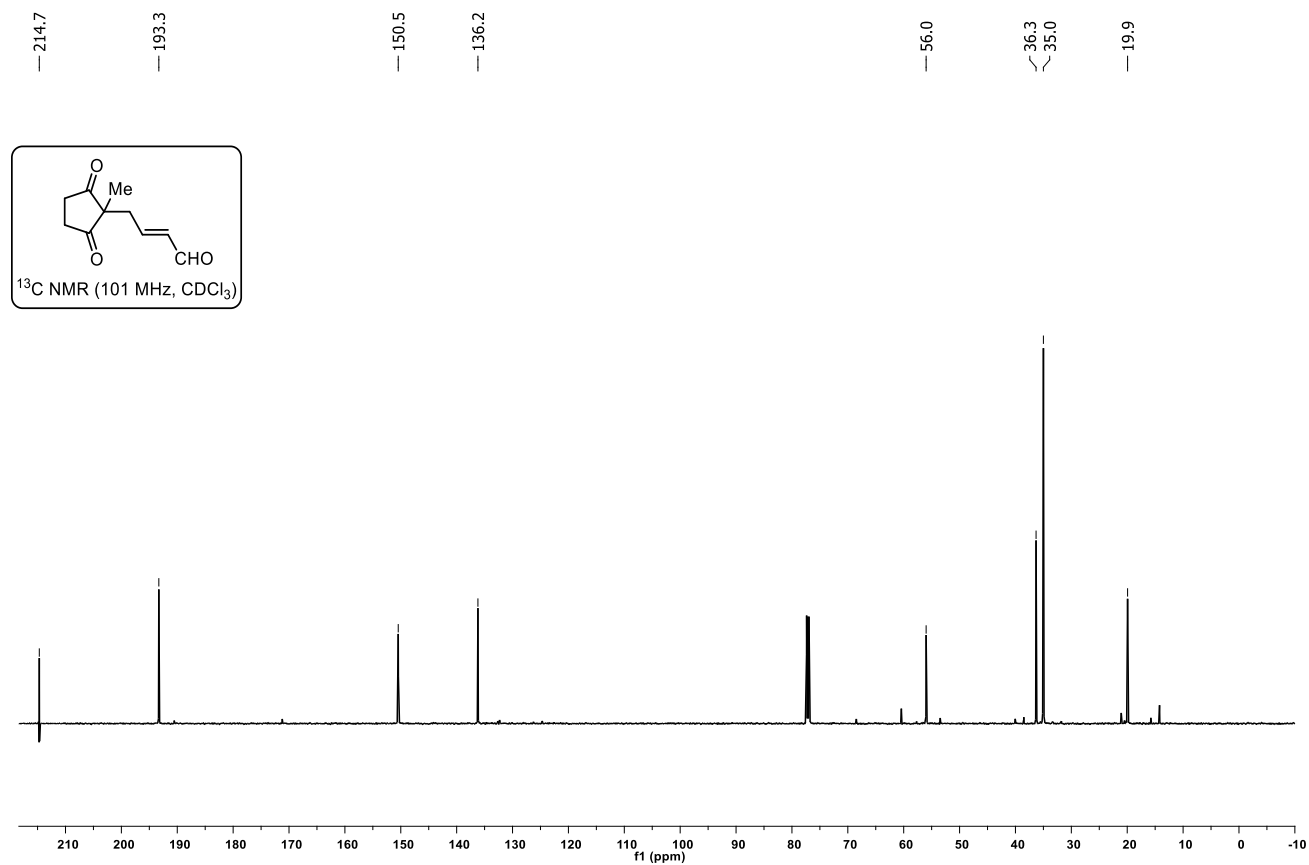

Supplement: d4cc00487f1.pdf [file d4cc00487f1.pdf]
